# Supplementary material for: Genome-Wide Association Mapping Identifies Key Genomic Regions for Grain Zinc and Iron Biofortification in Bread Wheat
Source: Front Plant Sci. 2022 Jun 30;13:903819. doi: 10.3389/fpls.2022.903819 (PMC9280339; doi:10.3389/fpls.2022.903819)
Supplement: Supplementary Table 1 — Grain zinc and iron concentrations for the 5,585 breeding lines from the International Maize and Wheat Improvement Centre’s bread wheat and zinc improvement programs. The best linear unbiased estimates (BLUEs) for grain zinc and iron concentrations in the yield trial bread wheat (YTBW), elite yield trial bread wheat (EYTBW), yield trial zinc (YTZN), and elite yield trial zinc (EYTZN) lines evaluated in the bed planting 5 irrigations environment (B5IR), bed planting 2 irrigations environment (B2IR) or small plots (SP) are given, along with the concentrations in the parcela chica (small plots) zinc (PCZN) lines. [file Data_Sheet_1.xlsx]

## Sheet: Table S1
Gid	Dataset	value
GID8776936	Iron EYTBW 2021 B2IR BLUEs	53.3655
GID8776976	Iron EYTBW 2021 B2IR BLUEs	52.1605
GID8776500	Iron EYTBW 2021 B2IR BLUEs	48.5665
GID8776532	Iron EYTBW 2021 B2IR BLUEs	47.1265
GID8790379	Iron EYTBW 2021 B2IR BLUEs	46.6767
GID8777633	Iron EYTBW 2021 B2IR BLUEs	45.8051
GID8785536	Iron EYTBW 2021 B2IR BLUEs	45.7269
GID8780310	Iron EYTBW 2021 B2IR BLUEs	45.6828
GID8779281	Iron EYTBW 2021 B2IR BLUEs	45.5903
GID8780007	Iron EYTBW 2021 B2IR BLUEs	45.4178
GID8776906	Iron EYTBW 2021 B2IR BLUEs	45.3405
GID8779462	Iron EYTBW 2021 B2IR BLUEs	45.2453
GID8776485	Iron EYTBW 2021 B2IR BLUEs	44.8715
GID8777196	Iron EYTBW 2021 B2IR BLUEs	44.7155
GID8783620	Iron EYTBW 2021 B2IR BLUEs	44.5801
GID8783333	Iron EYTBW 2021 B2IR BLUEs	44.559
GID8785571	Iron EYTBW 2021 B2IR BLUEs	44.5119
GID8777552	Iron EYTBW 2021 B2IR BLUEs	44.4751
GID8779279	Iron EYTBW 2021 B2IR BLUEs	44.4703
GID8790382	Iron EYTBW 2021 B2IR BLUEs	44.3717
GID8779152	Iron EYTBW 2021 B2IR BLUEs	44.3603
GID8780221	Iron EYTBW 2021 B2IR BLUEs	44.1028
GID8783898	Iron EYTBW 2021 B2IR BLUEs	44.0401
GID8779147	Iron EYTBW 2021 B2IR BLUEs	43.9603
GID8780745	Iron EYTBW 2021 B2IR BLUEs	43.8919
GID8777672	Iron EYTBW 2021 B2IR BLUEs	43.8201
GID8785712	Iron EYTBW 2021 B2IR BLUEs	43.7569
GID8776640	Iron EYTBW 2021 B2IR BLUEs	43.7315
GID8780050	Iron EYTBW 2021 B2IR BLUEs	43.6328
GID8777479	Iron EYTBW 2021 B2IR BLUEs	43.5588
GID8778919	Iron EYTBW 2021 B2IR BLUEs	43.5103
GID8782051	Iron EYTBW 2021 B2IR BLUEs	43.4349
GID8780285	Iron EYTBW 2021 B2IR BLUEs	43.4178
GID8781205	Iron EYTBW 2021 B2IR BLUEs	43.4134
GID8783541	Iron EYTBW 2021 B2IR BLUEs	43.379
GID8789680	Iron EYTBW 2021 B2IR BLUEs	43.3088
GID8779702	Iron EYTBW 2021 B2IR BLUEs	43.2928
GID8779999	Iron EYTBW 2021 B2IR BLUEs	43.2378
GID8780731	Iron EYTBW 2021 B2IR BLUEs	43.1969
GID8785962	Iron EYTBW 2021 B2IR BLUEs	43.1619
GID8777671	Iron EYTBW 2021 B2IR BLUEs	43.1551
GID8781635	Iron EYTBW 2021 B2IR BLUEs	43.1534
GID8778438	Iron EYTBW 2021 B2IR BLUEs	43.1239
GID8786002	Iron EYTBW 2021 B2IR BLUEs	43.1119
GID8783224	Iron EYTBW 2021 B2IR BLUEs	43.099
GID8777339	Iron EYTBW 2021 B2IR BLUEs	43.0351
GID8776489	Iron EYTBW 2021 B2IR BLUEs	43.0165
GID8777527	Iron EYTBW 2021 B2IR BLUEs	42.9701
GID8779704	Iron EYTBW 2021 B2IR BLUEs	42.9578
GID8777788	Iron EYTBW 2021 B2IR BLUEs	42.9562
GID8776788	Iron EYTBW 2021 B2IR BLUEs	42.9505
GID8778692	Iron EYTBW 2021 B2IR BLUEs	42.8622
GID8783800	Iron EYTBW 2021 B2IR BLUEs	42.8401
GID8785535	Iron EYTBW 2021 B2IR BLUEs	42.8014
GID8790160	Iron EYTBW 2021 B2IR BLUEs	42.7917
GID8780914	Iron EYTBW 2021 B2IR BLUEs	42.7072
GID8778561	Iron EYTBW 2021 B2IR BLUEs	42.6989
GID8780522	Iron EYTBW 2021 B2IR BLUEs	42.6415
GID8784091	Iron EYTBW 2021 B2IR BLUEs	42.6354
GID8783570	Iron EYTBW 2021 B2IR BLUEs	42.609
GID8784644	Iron EYTBW 2021 B2IR BLUEs	42.6054
GID8780799	Iron EYTBW 2021 B2IR BLUEs	42.5953
GID8785097	Iron EYTBW 2021 B2IR BLUEs	42.5754
GID8779461	Iron EYTBW 2021 B2IR BLUEs	42.5753
GID8777349	Iron EYTBW 2021 B2IR BLUEs	42.5701
GID8779285	Iron EYTBW 2021 B2IR BLUEs	42.5553
GID8783881	Iron EYTBW 2021 B2IR BLUEs	42.5551
GID8790584	Iron EYTBW 2021 B2IR BLUEs	42.5535
GID8776551	Iron EYTBW 2021 B2IR BLUEs	42.5265
GID8777600	Iron EYTBW 2021 B2IR BLUEs	42.4701
GID8778313	Iron EYTBW 2021 B2IR BLUEs	42.4392
GID8783977	Iron EYTBW 2021 B2IR BLUEs	42.4001
GID8783449	Iron EYTBW 2021 B2IR BLUEs	42.359
GID8779153	Iron EYTBW 2021 B2IR BLUEs	42.3453
GID8783371	Iron EYTBW 2021 B2IR BLUEs	42.344
GID8776720	Iron EYTBW 2021 B2IR BLUEs	42.3405
GID8779144	Iron EYTBW 2021 B2IR BLUEs	42.3353
GID8783432	Iron EYTBW 2021 B2IR BLUEs	42.299
GID8777470	Iron EYTBW 2021 B2IR BLUEs	42.2951
GID8753284	Iron EYTBW 2021 B2IR BLUEs	42.2738
GID8783479	Iron EYTBW 2021 B2IR BLUEs	42.259
GID8785379	Iron EYTBW 2021 B2IR BLUEs	42.2464
GID8785233	Iron EYTBW 2021 B2IR BLUEs	42.2454
GID8783709	Iron EYTBW 2021 B2IR BLUEs	42.2401
GID8777875	Iron EYTBW 2021 B2IR BLUEs	42.2312
GID8781789	Iron EYTBW 2021 B2IR BLUEs	42.2134
GID8778886	Iron EYTBW 2021 B2IR BLUEs	42.2072
GID8782949	Iron EYTBW 2021 B2IR BLUEs	42.1983
GID8784118	Iron EYTBW 2021 B2IR BLUEs	42.1954
GID8778333	Iron EYTBW 2021 B2IR BLUEs	42.1942
GID8783621	Iron EYTBW 2021 B2IR BLUEs	42.1901
GID8783474	Iron EYTBW 2021 B2IR BLUEs	42.184
GID8783632	Iron EYTBW 2021 B2IR BLUEs	42.1401
GID8779296	Iron EYTBW 2021 B2IR BLUEs	42.1253
GID8781791	Iron EYTBW 2021 B2IR BLUEs	42.1184
GID8783716	Iron EYTBW 2021 B2IR BLUEs	42.1151
GID8781530	Iron EYTBW 2021 B2IR BLUEs	42.0584
GID8790089	Iron EYTBW 2021 B2IR BLUEs	42.0517
GID8783559	Iron EYTBW 2021 B2IR BLUEs	42.039
GID8780220	Iron EYTBW 2021 B2IR BLUEs	42.0278
GID8777621	Iron EYTBW 2021 B2IR BLUEs	42.0251
GID8777273	Iron EYTBW 2021 B2IR BLUEs	42.0205
GID8780746	Iron EYTBW 2021 B2IR BLUEs	42.0103
GID8783426	Iron EYTBW 2021 B2IR BLUEs	42.004
GID8782369	Iron EYTBW 2021 B2IR BLUEs	41.9949
GID8776494	Iron EYTBW 2021 B2IR BLUEs	41.9865
GID8785538	Iron EYTBW 2021 B2IR BLUEs	41.9769
GID8778345	Iron EYTBW 2021 B2IR BLUEs	41.9689
GID8790506	Iron EYTBW 2021 B2IR BLUEs	41.9617
GID8778703	Iron EYTBW 2021 B2IR BLUEs	41.9572
GID8783828	Iron EYTBW 2021 B2IR BLUEs	41.9501
GID8785857	Iron EYTBW 2021 B2IR BLUEs	41.9364
GID8776768	Iron EYTBW 2021 B2IR BLUEs	41.9255
GID8778824	Iron EYTBW 2021 B2IR BLUEs	41.9172
GID8782379	Iron EYTBW 2021 B2IR BLUEs	41.8999
GID8777198	Iron EYTBW 2021 B2IR BLUEs	41.8755
GID8777703	Iron EYTBW 2021 B2IR BLUEs	41.8001
GID8783402	Iron EYTBW 2021 B2IR BLUEs	41.799
GID8779741	Iron EYTBW 2021 B2IR BLUEs	41.7878
GID8784542	Iron EYTBW 2021 B2IR BLUEs	41.7854
GID8782939	Iron EYTBW 2021 B2IR BLUEs	41.7833
GID8777083	Iron EYTBW 2021 B2IR BLUEs	41.7705
GID8778477	Iron EYTBW 2021 B2IR BLUEs	41.7589
GID8783850	Iron EYTBW 2021 B2IR BLUEs	41.7501
GID8783327	Iron EYTBW 2021 B2IR BLUEs	41.749
GID8785533	Iron EYTBW 2021 B2IR BLUEs	41.7464
GID8779661	Iron EYTBW 2021 B2IR BLUEs	41.7178
GID8780184	Iron EYTBW 2021 B2IR BLUEs	41.7128
GID8776934	Iron EYTBW 2021 B2IR BLUEs	41.6905
GID8777854	Iron EYTBW 2021 B2IR BLUEs	41.6812
GID8782778	Iron EYTBW 2021 B2IR BLUEs	41.6683
GID8780838	Iron EYTBW 2021 B2IR BLUEs	41.6503
GID8789683	Iron EYTBW 2021 B2IR BLUEs	41.6488
GID8783372	Iron EYTBW 2021 B2IR BLUEs	41.644
GID8783628	Iron EYTBW 2021 B2IR BLUEs	41.6251
GID8782376	Iron EYTBW 2021 B2IR BLUEs	41.6249
GID8790502	Iron EYTBW 2021 B2IR BLUEs	41.6217
GID8780697	Iron EYTBW 2021 B2IR BLUEs	41.6203
GID8785799	Iron EYTBW 2021 B2IR BLUEs	41.5914
GID8780831	Iron EYTBW 2021 B2IR BLUEs	41.5853
GID8783061	Iron EYTBW 2021 B2IR BLUEs	41.5633
GID8779650	Iron EYTBW 2021 B2IR BLUEs	41.5628
GID8778479	Iron EYTBW 2021 B2IR BLUEs	41.5539
GID8785365	Iron EYTBW 2021 B2IR BLUEs	41.5188
GID8785977	Iron EYTBW 2021 B2IR BLUEs	41.5169
GID8777505	Iron EYTBW 2021 B2IR BLUEs	41.5151
GID8783010	Iron EYTBW 2021 B2IR BLUEs	41.5133
GID8777525	Iron EYTBW 2021 B2IR BLUEs	41.4901
GID8785221	Iron EYTBW 2021 B2IR BLUEs	41.4854
GID8782586	Iron EYTBW 2021 B2IR BLUEs	41.4849
GID8783153	Iron EYTBW 2021 B2IR BLUEs	41.4833
GID8790197	Iron EYTBW 2021 B2IR BLUEs	41.4817
GID8782910	Iron EYTBW 2021 B2IR BLUEs	41.4783
GID8782125	Iron EYTBW 2021 B2IR BLUEs	41.4749
GID8782999	Iron EYTBW 2021 B2IR BLUEs	41.4683
GID8777325	Iron EYTBW 2021 B2IR BLUEs	41.4601
GID8782746	Iron EYTBW 2021 B2IR BLUEs	41.4483
GID8785521	Iron EYTBW 2021 B2IR BLUEs	41.4464
GID8777556	Iron EYTBW 2021 B2IR BLUEs	41.4251
GID8779168	Iron EYTBW 2021 B2IR BLUEs	41.4003
GID8784602	Iron EYTBW 2021 B2IR BLUEs	41.3854
GID8785543	Iron EYTBW 2021 B2IR BLUEs	41.3769
GID8777798	Iron EYTBW 2021 B2IR BLUEs	41.3769
GID8776498	Iron EYTBW 2021 B2IR BLUEs	41.3765
GID8783782	Iron EYTBW 2021 B2IR BLUEs	41.3551
GID8778678	Iron EYTBW 2021 B2IR BLUEs	41.3222
GID8779979	Iron EYTBW 2021 B2IR BLUEs	41.3128
GID8780058	Iron EYTBW 2021 B2IR BLUEs	41.3028
GID8777914	Iron EYTBW 2021 B2IR BLUEs	41.2862
GID8781528	Iron EYTBW 2021 B2IR BLUEs	41.2634
GID8783418	Iron EYTBW 2021 B2IR BLUEs	41.249
GID8784961	Iron EYTBW 2021 B2IR BLUEs	41.2469
GID8777354	Iron EYTBW 2021 B2IR BLUEs	41.2401
GID8785091	Iron EYTBW 2021 B2IR BLUEs	41.2154
GID8777862	Iron EYTBW 2021 B2IR BLUEs	41.1962
GID8777704	Iron EYTBW 2021 B2IR BLUEs	41.1901
GID8780224	Iron EYTBW 2021 B2IR BLUEs	41.1878
GID8779492	Iron EYTBW 2021 B2IR BLUEs	41.1878
GID8790528	Iron EYTBW 2021 B2IR BLUEs	41.1785
GID8781148	Iron EYTBW 2021 B2IR BLUEs	41.1772
GID8785750	Iron EYTBW 2021 B2IR BLUEs	41.1369
GID8776789	Iron EYTBW 2021 B2IR BLUEs	41.1355
GID8778195	Iron EYTBW 2021 B2IR BLUEs	41.1342
GID8781147	Iron EYTBW 2021 B2IR BLUEs	41.1322
GID8779636	Iron EYTBW 2021 B2IR BLUEs	41.1128
GID8786001	Iron EYTBW 2021 B2IR BLUEs	41.1019
GID8785544	Iron EYTBW 2021 B2IR BLUEs	41.1019
GID8785921	Iron EYTBW 2021 B2IR BLUEs	41.1014
GID8779084	Iron EYTBW 2021 B2IR BLUEs	41.0953
GID8782371	Iron EYTBW 2021 B2IR BLUEs	41.0799
GID8780764	Iron EYTBW 2021 B2IR BLUEs	41.0753
GID8783222	Iron EYTBW 2021 B2IR BLUEs	41.069
GID8783348	Iron EYTBW 2021 B2IR BLUEs	41.064
GID8776517	Iron EYTBW 2021 B2IR BLUEs	41.0565
GID8783325	Iron EYTBW 2021 B2IR BLUEs	41.044
GID8782370	Iron EYTBW 2021 B2IR BLUEs	41.0149
GID8789667	Iron EYTBW 2021 B2IR BLUEs	41.0088
GID8786027	Iron EYTBW 2021 B2IR BLUEs	40.9969
GID8781802	Iron EYTBW 2021 B2IR BLUEs	40.9849
GID8780720	Iron EYTBW 2021 B2IR BLUEs	40.9803
GID8785554	Iron EYTBW 2021 B2IR BLUEs	40.9769
GID8776535	Iron EYTBW 2021 B2IR BLUEs	40.9715
GID8780339	Iron EYTBW 2021 B2IR BLUEs	40.9628
GID8778300	Iron EYTBW 2021 B2IR BLUEs	40.9542
GID8778473	Iron EYTBW 2021 B2IR BLUEs	40.9539
GID8778602	Iron EYTBW 2021 B2IR BLUEs	40.9538
GID8777783	Iron EYTBW 2021 B2IR BLUEs	40.9512
GID8779089	Iron EYTBW 2021 B2IR BLUEs	40.9503
GID8778430	Iron EYTBW 2021 B2IR BLUEs	40.9489
GID8777602	Iron EYTBW 2021 B2IR BLUEs	40.9451
GID8779563	Iron EYTBW 2021 B2IR BLUEs	40.9328
GID8778070	Iron EYTBW 2021 B2IR BLUEs	40.9242
GID8790570	Iron EYTBW 2021 B2IR BLUEs	40.9235
GID8779677	Iron EYTBW 2021 B2IR BLUEs	40.9028
GID8777374	Iron EYTBW 2021 B2IR BLUEs	40.9001
GID8778281	Iron EYTBW 2021 B2IR BLUEs	40.8992
GID8780291	Iron EYTBW 2021 B2IR BLUEs	40.8928
GID8785490	Iron EYTBW 2021 B2IR BLUEs	40.8914
GID8785961	Iron EYTBW 2021 B2IR BLUEs	40.8819
GID8783562	Iron EYTBW 2021 B2IR BLUEs	40.854
GID8790527	Iron EYTBW 2021 B2IR BLUEs	40.8285
GID8779267	Iron EYTBW 2021 B2IR BLUEs	40.8253
GID8785057	Iron EYTBW 2021 B2IR BLUEs	40.8004
GID8785109	Iron EYTBW 2021 B2IR BLUEs	40.7954
GID8790583	Iron EYTBW 2021 B2IR BLUEs	40.7885
GID8784181	Iron EYTBW 2021 B2IR BLUEs	40.7854
GID8783639	Iron EYTBW 2021 B2IR BLUEs	40.7801
GID8777932	Iron EYTBW 2021 B2IR BLUEs	40.7762
GID8785840	Iron EYTBW 2021 B2IR BLUEs	40.7564
GID8777381	Iron EYTBW 2021 B2IR BLUEs	40.7551
GID8790783	Iron EYTBW 2021 B2IR BLUEs	40.7535
GID8776777	Iron EYTBW 2021 B2IR BLUEs	40.7505
GID8790900	Iron EYTBW 2021 B2IR BLUEs	40.7435
GID8778299	Iron EYTBW 2021 B2IR BLUEs	40.7192
GID8783292	Iron EYTBW 2021 B2IR BLUEs	40.714
GID8778336	Iron EYTBW 2021 B2IR BLUEs	40.7089
GID8786046	Iron EYTBW 2021 B2IR BLUEs	40.7053
GID8777379	Iron EYTBW 2021 B2IR BLUEs	40.7001
GID8789734	Iron EYTBW 2021 B2IR BLUEs	40.6988
GID8782950	Iron EYTBW 2021 B2IR BLUEs	40.6833
GID8777549	Iron EYTBW 2021 B2IR BLUEs	40.6701
GID8778449	Iron EYTBW 2021 B2IR BLUEs	40.6689
GID8777829	Iron EYTBW 2021 B2IR BLUEs	40.6662
GID8783572	Iron EYTBW 2021 B2IR BLUEs	40.6551
GID8785992	Iron EYTBW 2021 B2IR BLUEs	40.6519
GID8782372	Iron EYTBW 2021 B2IR BLUEs	40.6449
GID8777772	Iron EYTBW 2021 B2IR BLUEs	40.6412
GID8783336	Iron EYTBW 2021 B2IR BLUEs	40.639
GID8779985	Iron EYTBW 2021 B2IR BLUEs	40.6178
GID8790637	Iron EYTBW 2021 B2IR BLUEs	40.6135
GID8781232	Iron EYTBW 2021 B2IR BLUEs	40.6134
GID8778241	Iron EYTBW 2021 B2IR BLUEs	40.5992
GID8781588	Iron EYTBW 2021 B2IR BLUEs	40.5884
GID8785470	Iron EYTBW 2021 B2IR BLUEs	40.5864
GID8790948	Iron EYTBW 2021 B2IR BLUEs	40.5785
GID8783586	Iron EYTBW 2021 B2IR BLUEs	40.5701
GID8785823	Iron EYTBW 2021 B2IR BLUEs	40.5664
GID8776712	Iron EYTBW 2021 B2IR BLUEs	40.5555
GID8778719	Iron EYTBW 2021 B2IR BLUEs	40.5522
GID8778586	Iron EYTBW 2021 B2IR BLUEs	40.5489
GID8784143	Iron EYTBW 2021 B2IR BLUEs	40.5467
GID8785376	Iron EYTBW 2021 B2IR BLUEs	40.5464
GID8777482	Iron EYTBW 2021 B2IR BLUEs	40.5251
GID8785949	Iron EYTBW 2021 B2IR BLUEs	40.5064
GID8790048	Iron EYTBW 2021 B2IR BLUEs	40.5017
GID8777518	Iron EYTBW 2021 B2IR BLUEs	40.5001
GID8778634	Iron EYTBW 2021 B2IR BLUEs	40.4939
GID8777533	Iron EYTBW 2021 B2IR BLUEs	40.4851
GID8778946	Iron EYTBW 2021 B2IR BLUEs	40.4803
GID8784312	Iron EYTBW 2021 B2IR BLUEs	40.4754
GID8778287	Iron EYTBW 2021 B2IR BLUEs	40.4642
GID8776501	Iron EYTBW 2021 B2IR BLUEs	40.4615
GID8790046	Iron EYTBW 2021 B2IR BLUEs	40.4438
GID8783160	Iron EYTBW 2021 B2IR BLUEs	40.4283
GID8780104	Iron EYTBW 2021 B2IR BLUEs	40.4278
GID8777697	Iron EYTBW 2021 B2IR BLUEs	40.4251
GID8783283	Iron EYTBW 2021 B2IR BLUEs	40.424
GID8777027	Iron EYTBW 2021 B2IR BLUEs	40.4155
GID8780961	Iron EYTBW 2021 B2IR BLUEs	40.4022
GID8782725	Iron EYTBW 2021 B2IR BLUEs	40.3983
GID8780587	Iron EYTBW 2021 B2IR BLUEs	40.3765
GID8784308	Iron EYTBW 2021 B2IR BLUEs	40.3504
GID8785694	Iron EYTBW 2021 B2IR BLUEs	40.3469
GID8776530	Iron EYTBW 2021 B2IR BLUEs	40.3465
GID8777607	Iron EYTBW 2021 B2IR BLUEs	40.3451
GID8777283	Iron EYTBW 2021 B2IR BLUEs	40.3451
GID8783226	Iron EYTBW 2021 B2IR BLUEs	40.344
GID8782055	Iron EYTBW 2021 B2IR BLUEs	40.3319
GID8783545	Iron EYTBW 2021 B2IR BLUEs	40.329
GID8779482	Iron EYTBW 2021 B2IR BLUEs	40.3278
GID8782981	Iron EYTBW 2021 B2IR BLUEs	40.2983
GID8778326	Iron EYTBW 2021 B2IR BLUEs	40.2942
GID8789904	Iron EYTBW 2021 B2IR BLUEs	40.2838
GID8782588	Iron EYTBW 2021 B2IR BLUEs	40.2799
GID8781729	Iron EYTBW 2021 B2IR BLUEs	40.2784
GID8781332	Iron EYTBW 2021 B2IR BLUEs	40.2734
GID8782890	Iron EYTBW 2021 B2IR BLUEs	40.2733
GID8790304	Iron EYTBW 2021 B2IR BLUEs	40.2717
GID8777819	Iron EYTBW 2021 B2IR BLUEs	40.2662
GID8784900	Iron EYTBW 2021 B2IR BLUEs	40.2564
GID8785457	Iron EYTBW 2021 B2IR BLUEs	40.2514
GID8785269	Iron EYTBW 2021 B2IR BLUEs	40.2514
GID8785160	Iron EYTBW 2021 B2IR BLUEs	40.2504
GID8783722	Iron EYTBW 2021 B2IR BLUEs	40.2501
GID8778821	Iron EYTBW 2021 B2IR BLUEs	40.2472
GID8782419	Iron EYTBW 2021 B2IR BLUEs	40.2369
GID8778772	Iron EYTBW 2021 B2IR BLUEs	40.2222
GID8784313	Iron EYTBW 2021 B2IR BLUEs	40.2154
GID8783444	Iron EYTBW 2021 B2IR BLUEs	40.2069
GID8790384	Iron EYTBW 2021 B2IR BLUEs	40.2067
GID8778918	Iron EYTBW 2021 B2IR BLUEs	40.2053
GID8777956	Iron EYTBW 2021 B2IR BLUEs	40.2012
GID8790414	Iron EYTBW 2021 B2IR BLUEs	40.1967
GID8790885	Iron EYTBW 2021 B2IR BLUEs	40.1835
GID8778350	Iron EYTBW 2021 B2IR BLUEs	40.1689
GID8790337	Iron EYTBW 2021 B2IR BLUEs	40.1617
GID8777234	Iron EYTBW 2021 B2IR BLUEs	40.1605
GID8777611	Iron EYTBW 2021 B2IR BLUEs	40.1551
GID8781204	Iron EYTBW 2021 B2IR BLUEs	40.1534
GID8782912	Iron EYTBW 2021 B2IR BLUEs	40.1533
GID8779079	Iron EYTBW 2021 B2IR BLUEs	40.1503
GID8790024	Iron EYTBW 2021 B2IR BLUEs	40.1288
GID8782945	Iron EYTBW 2021 B2IR BLUEs	40.1283
GID8779300	Iron EYTBW 2021 B2IR BLUEs	40.1253
GID8782902	Iron EYTBW 2021 B2IR BLUEs	40.1233
GID8782690	Iron EYTBW 2021 B2IR BLUEs	40.1233
GID8780491	Iron EYTBW 2021 B2IR BLUEs	40.1215
GID8783997	Iron EYTBW 2021 B2IR BLUEs	40.1151
GID8781179	Iron EYTBW 2021 B2IR BLUEs	40.1084
GID8783470	Iron EYTBW 2021 B2IR BLUEs	40.104
GID8784401	Iron EYTBW 2021 B2IR BLUEs	40.0719
GID8784087	Iron EYTBW 2021 B2IR BLUEs	40.0704
GID8779498	Iron EYTBW 2021 B2IR BLUEs	40.0678
GID8776728	Iron EYTBW 2021 B2IR BLUEs	40.0455
GID8778642	Iron EYTBW 2021 B2IR BLUEs	40.0438
GID8779392	Iron EYTBW 2021 B2IR BLUEs	40.0203
GID8789881	Iron EYTBW 2021 B2IR BLUEs	40.0138
GID8781427	Iron EYTBW 2021 B2IR BLUEs	40.0134
GID8790266	Iron EYTBW 2021 B2IR BLUEs	40.0017
GID8784370	Iron EYTBW 2021 B2IR BLUEs	39.9954
GID8777200	Iron EYTBW 2021 B2IR BLUEs	39.9905
GID8783544	Iron EYTBW 2021 B2IR BLUEs	39.989
GID8778444	Iron EYTBW 2021 B2IR BLUEs	39.9739
GID8779097	Iron EYTBW 2021 B2IR BLUEs	39.9653
GID8785569	Iron EYTBW 2021 B2IR BLUEs	39.9619
GID8783948	Iron EYTBW 2021 B2IR BLUEs	39.9601
GID8778330	Iron EYTBW 2021 B2IR BLUEs	39.9542
GID8780181	Iron EYTBW 2021 B2IR BLUEs	39.9478
GID8783775	Iron EYTBW 2021 B2IR BLUEs	39.9401
GID8782141	Iron EYTBW 2021 B2IR BLUEs	39.9199
GID8790788	Iron EYTBW 2021 B2IR BLUEs	39.9185
GID8782047	Iron EYTBW 2021 B2IR BLUEs	39.9119
GID8790244	Iron EYTBW 2021 B2IR BLUEs	39.9067
GID8790515	Iron EYTBW 2021 B2IR BLUEs	39.9035
GID8789701	Iron EYTBW 2021 B2IR BLUEs	39.8788
GID8790529	Iron EYTBW 2021 B2IR BLUEs	39.8785
GID8779450	Iron EYTBW 2021 B2IR BLUEs	39.8753
GID8789960	Iron EYTBW 2021 B2IR BLUEs	39.8688
GID8790275	Iron EYTBW 2021 B2IR BLUEs	39.8667
GID8776975	Iron EYTBW 2021 B2IR BLUEs	39.8655
GID8777274	Iron EYTBW 2021 B2IR BLUEs	39.8651
GID8783477	Iron EYTBW 2021 B2IR BLUEs	39.859
GID8785948	Iron EYTBW 2021 B2IR BLUEs	39.8564
GID7806808	Iron EYTBW 2021 B2IR BLUEs	39.8545
GID8783103	Iron EYTBW 2021 B2IR BLUEs	39.8283
GID8778701	Iron EYTBW 2021 B2IR BLUEs	39.8272
GID7400769	Iron EYTBW 2021 B2IR BLUEs	39.8175
GID8782631	Iron EYTBW 2021 B2IR BLUEs	39.8133
GID8790139	Iron EYTBW 2021 B2IR BLUEs	39.8117
GID8782069	Iron EYTBW 2021 B2IR BLUEs	39.8099
GID8790800	Iron EYTBW 2021 B2IR BLUEs	39.8035
GID8784001	Iron EYTBW 2021 B2IR BLUEs	39.8001
GID8783636	Iron EYTBW 2021 B2IR BLUEs	39.7851
GID8782124	Iron EYTBW 2021 B2IR BLUEs	39.7849
GID8790300	Iron EYTBW 2021 B2IR BLUEs	39.7817
GID8781381	Iron EYTBW 2021 B2IR BLUEs	39.7784
GID8782835	Iron EYTBW 2021 B2IR BLUEs	39.7683
GID8790497	Iron EYTBW 2021 B2IR BLUEs	39.7667
GID8782977	Iron EYTBW 2021 B2IR BLUEs	39.7583
GID8780413	Iron EYTBW 2021 B2IR BLUEs	39.7565
GID8780873	Iron EYTBW 2021 B2IR BLUEs	39.7472
GID8784997	Iron EYTBW 2021 B2IR BLUEs	39.7454
GID8783512	Iron EYTBW 2021 B2IR BLUEs	39.744
GID8783468	Iron EYTBW 2021 B2IR BLUEs	39.739
GID8778082	Iron EYTBW 2021 B2IR BLUEs	39.7242
GID8784543	Iron EYTBW 2021 B2IR BLUEs	39.7154
GID8785295	Iron EYTBW 2021 B2IR BLUEs	39.7138
GID8777020	Iron EYTBW 2021 B2IR BLUEs	39.7105
GID8782135	Iron EYTBW 2021 B2IR BLUEs	39.7099
GID8779700	Iron EYTBW 2021 B2IR BLUEs	39.7078
GID8790792	Iron EYTBW 2021 B2IR BLUEs	39.6985
GID8790693	Iron EYTBW 2021 B2IR BLUEs	39.6935
GID8777775	Iron EYTBW 2021 B2IR BLUEs	39.6912
GID8778686	Iron EYTBW 2021 B2IR BLUEs	39.6872
GID8790101	Iron EYTBW 2021 B2IR BLUEs	39.6817
GID8790550	Iron EYTBW 2021 B2IR BLUEs	39.6785
GID8780392	Iron EYTBW 2021 B2IR BLUEs	39.6778
GID8790201	Iron EYTBW 2021 B2IR BLUEs	39.6717
GID8780907	Iron EYTBW 2021 B2IR BLUEs	39.6672
GID8777113	Iron EYTBW 2021 B2IR BLUEs	39.6655
GID8784314	Iron EYTBW 2021 B2IR BLUEs	39.6654
GID8784048	Iron EYTBW 2021 B2IR BLUEs	39.6604
GID8781795	Iron EYTBW 2021 B2IR BLUEs	39.6599
GID8781523	Iron EYTBW 2021 B2IR BLUEs	39.6484
GID8779397	Iron EYTBW 2021 B2IR BLUEs	39.6453
GID8778388	Iron EYTBW 2021 B2IR BLUEs	39.6439
GID8781623	Iron EYTBW 2021 B2IR BLUEs	39.6384
GID8783651	Iron EYTBW 2021 B2IR BLUEs	39.6351
GID8778627	Iron EYTBW 2021 B2IR BLUEs	39.6339
GID8784985	Iron EYTBW 2021 B2IR BLUEs	39.6304
GID8781637	Iron EYTBW 2021 B2IR BLUEs	39.6284
GID8779395	Iron EYTBW 2021 B2IR BLUEs	39.6203
GID8779149	Iron EYTBW 2021 B2IR BLUEs	39.6153
GID8779024	Iron EYTBW 2021 B2IR BLUEs	39.6153
GID8783427	Iron EYTBW 2021 B2IR BLUEs	39.609
GID8785529	Iron EYTBW 2021 B2IR BLUEs	39.6064
GID8782192	Iron EYTBW 2021 B2IR BLUEs	39.6049
GID8777950	Iron EYTBW 2021 B2IR BLUEs	39.6012
GID8784275	Iron EYTBW 2021 B2IR BLUEs	39.5904
GID8782993	Iron EYTBW 2021 B2IR BLUEs	39.5633
GID8779099	Iron EYTBW 2021 B2IR BLUEs	39.5603
GID8783445	Iron EYTBW 2021 B2IR BLUEs	39.559
GID8790344	Iron EYTBW 2021 B2IR BLUEs	39.5517
GID8780252	Iron EYTBW 2021 B2IR BLUEs	39.5478
GID8777659	Iron EYTBW 2021 B2IR BLUEs	39.5401
GID8782373	Iron EYTBW 2021 B2IR BLUEs	39.5399
GID8781081	Iron EYTBW 2021 B2IR BLUEs	39.5322
GID8780399	Iron EYTBW 2021 B2IR BLUEs	39.5315
GID8777097	Iron EYTBW 2021 B2IR BLUEs	39.5205
GID8783972	Iron EYTBW 2021 B2IR BLUEs	39.5201
GID8779895	Iron EYTBW 2021 B2IR BLUEs	39.5178
GID8783322	Iron EYTBW 2021 B2IR BLUEs	39.504
GID8790806	Iron EYTBW 2021 B2IR BLUEs	39.5035
GID8778080	Iron EYTBW 2021 B2IR BLUEs	39.4992
GID8779682	Iron EYTBW 2021 B2IR BLUEs	39.4928
GID8782283	Iron EYTBW 2021 B2IR BLUEs	39.4849
GID8778002	Iron EYTBW 2021 B2IR BLUEs	39.4762
GID8783373	Iron EYTBW 2021 B2IR BLUEs	39.474
GID8783437	Iron EYTBW 2021 B2IR BLUEs	39.4719
GID8778418	Iron EYTBW 2021 B2IR BLUEs	39.4689
GID8779085	Iron EYTBW 2021 B2IR BLUEs	39.4653
GID8777193	Iron EYTBW 2021 B2IR BLUEs	39.4605
GID8778441	Iron EYTBW 2021 B2IR BLUEs	39.4589
GID8785801	Iron EYTBW 2021 B2IR BLUEs	39.4564
GID8790289	Iron EYTBW 2021 B2IR BLUEs	39.4517
GID8784839	Iron EYTBW 2021 B2IR BLUEs	39.4464
GID8785738	Iron EYTBW 2021 B2IR BLUEs	39.4419
GID8783593	Iron EYTBW 2021 B2IR BLUEs	39.4351
GID8790309	Iron EYTBW 2021 B2IR BLUEs	39.4317
GID8777841	Iron EYTBW 2021 B2IR BLUEs	39.4312
GID8777511	Iron EYTBW 2021 B2IR BLUEs	39.4201
GID8784002	Iron EYTBW 2021 B2IR BLUEs	39.4051
GID8783102	Iron EYTBW 2021 B2IR BLUEs	39.4033
GID8776550	Iron EYTBW 2021 B2IR BLUEs	39.4015
GID8776961	Iron EYTBW 2021 B2IR BLUEs	39.3955
GID8776851	Iron EYTBW 2021 B2IR BLUEs	39.3855
GID8785993	Iron EYTBW 2021 B2IR BLUEs	39.3819
GID8781775	Iron EYTBW 2021 B2IR BLUEs	39.3684
GID8785063	Iron EYTBW 2021 B2IR BLUEs	39.3654
GID8783678	Iron EYTBW 2021 B2IR BLUEs	39.3451
GID8778352	Iron EYTBW 2021 B2IR BLUEs	39.3439
GID8778743	Iron EYTBW 2021 B2IR BLUEs	39.3338
GID8785772	Iron EYTBW 2021 B2IR BLUEs	39.3264
GID8782416	Iron EYTBW 2021 B2IR BLUEs	39.3099
GID8790075	Iron EYTBW 2021 B2IR BLUEs	39.3067
GID8777833	Iron EYTBW 2021 B2IR BLUEs	39.3062
GID8784107	Iron EYTBW 2021 B2IR BLUEs	39.3004
GID8790053	Iron EYTBW 2021 B2IR BLUEs	39.2967
GID8783616	Iron EYTBW 2021 B2IR BLUEs	39.2901
GID8753296	Iron EYTBW 2021 B2IR BLUEs	39.2888
GID8780995	Iron EYTBW 2021 B2IR BLUEs	39.2872
GID8785438	Iron EYTBW 2021 B2IR BLUEs	39.2864
GID8789669	Iron EYTBW 2021 B2IR BLUEs	39.2838
GID8780243	Iron EYTBW 2021 B2IR BLUEs	39.2778
GID8777993	Iron EYTBW 2021 B2IR BLUEs	39.2712
GID8778175	Iron EYTBW 2021 B2IR BLUEs	39.2692
GID8782911	Iron EYTBW 2021 B2IR BLUEs	39.2683
GID8782716	Iron EYTBW 2021 B2IR BLUEs	39.2633
GID8780398	Iron EYTBW 2021 B2IR BLUEs	39.2615
GID8785959	Iron EYTBW 2021 B2IR BLUEs	39.2569
GID8782332	Iron EYTBW 2021 B2IR BLUEs	39.2549
GID8784092	Iron EYTBW 2021 B2IR BLUEs	39.2504
GID8783350	Iron EYTBW 2021 B2IR BLUEs	39.249
GID8790713	Iron EYTBW 2021 B2IR BLUEs	39.2385
GID8778319	Iron EYTBW 2021 B2IR BLUEs	39.2292
GID8780608	Iron EYTBW 2021 B2IR BLUEs	39.2265
GID8777906	Iron EYTBW 2021 B2IR BLUEs	39.2262
GID8776911	Iron EYTBW 2021 B2IR BLUEs	39.2205
GID8784931	Iron EYTBW 2021 B2IR BLUEs	39.2204
GID8777452	Iron EYTBW 2021 B2IR BLUEs	39.2188
GID8784734	Iron EYTBW 2021 B2IR BLUEs	39.2154
GID8777162	Iron EYTBW 2021 B2IR BLUEs	39.2055
GID8777705	Iron EYTBW 2021 B2IR BLUEs	39.2051
GID8780946	Iron EYTBW 2021 B2IR BLUEs	39.2022
GID8776565	Iron EYTBW 2021 B2IR BLUEs	39.1965
GID8777696	Iron EYTBW 2021 B2IR BLUEs	39.1951
GID8777353	Iron EYTBW 2021 B2IR BLUEs	39.1951
GID8781784	Iron EYTBW 2021 B2IR BLUEs	39.1884
GID8790162	Iron EYTBW 2021 B2IR BLUEs	39.1867
GID8780240	Iron EYTBW 2021 B2IR BLUEs	39.1778
GID8778129	Iron EYTBW 2021 B2IR BLUEs	39.1692
GID8783557	Iron EYTBW 2021 B2IR BLUEs	39.159
GID8783543	Iron EYTBW 2021 B2IR BLUEs	39.159
GID8783271	Iron EYTBW 2021 B2IR BLUEs	39.159
GID8777487	Iron EYTBW 2021 B2IR BLUEs	39.1551
GID8778298	Iron EYTBW 2021 B2IR BLUEs	39.1442
GID8780406	Iron EYTBW 2021 B2IR BLUEs	39.1415
GID8781506	Iron EYTBW 2021 B2IR BLUEs	39.1384
GID8783338	Iron EYTBW 2021 B2IR BLUEs	39.124
GID8783829	Iron EYTBW 2021 B2IR BLUEs	39.1201
GID8781590	Iron EYTBW 2021 B2IR BLUEs	39.1084
GID8790178	Iron EYTBW 2021 B2IR BLUEs	39.1067
GID8785007	Iron EYTBW 2021 B2IR BLUEs	39.0954
GID8789958	Iron EYTBW 2021 B2IR BLUEs	39.0938
GID8779676	Iron EYTBW 2021 B2IR BLUEs	39.0878
GID8781422	Iron EYTBW 2021 B2IR BLUEs	39.0834
GID8777923	Iron EYTBW 2021 B2IR BLUEs	39.0712
GID8790699	Iron EYTBW 2021 B2IR BLUEs	39.0635
GID8785345	Iron EYTBW 2021 B2IR BLUEs	39.0564
GID8785545	Iron EYTBW 2021 B2IR BLUEs	39.0419
GID8785726	Iron EYTBW 2021 B2IR BLUEs	39.0369
GID8783561	Iron EYTBW 2021 B2IR BLUEs	39.034
GID8785514	Iron EYTBW 2021 B2IR BLUEs	39.0314
GID8777884	Iron EYTBW 2021 B2IR BLUEs	39.0312
GID8790668	Iron EYTBW 2021 B2IR BLUEs	39.0235
GID8777980	Iron EYTBW 2021 B2IR BLUEs	39.0212
GID8783873	Iron EYTBW 2021 B2IR BLUEs	39.0201
GID8783044	Iron EYTBW 2021 B2IR BLUEs	39.0133
GID8790292	Iron EYTBW 2021 B2IR BLUEs	39.0067
GID8777723	Iron EYTBW 2021 B2IR BLUEs	39.0062
GID8753285	Iron EYTBW 2021 B2IR BLUEs	38.9938
GID8790692	Iron EYTBW 2021 B2IR BLUEs	38.9885
GID8786011	Iron EYTBW 2021 B2IR BLUEs	38.9819
GID8778181	Iron EYTBW 2021 B2IR BLUEs	38.9792
GID8776958	Iron EYTBW 2021 B2IR BLUEs	38.9755
GID8778066	Iron EYTBW 2021 B2IR BLUEs	38.9642
GID8778653	Iron EYTBW 2021 B2IR BLUEs	38.9622
GID8778923	Iron EYTBW 2021 B2IR BLUEs	38.9603
GID8783982	Iron EYTBW 2021 B2IR BLUEs	38.9601
GID8790258	Iron EYTBW 2021 B2IR BLUEs	38.9467
GID8781963	Iron EYTBW 2021 B2IR BLUEs	38.9449
GID8781508	Iron EYTBW 2021 B2IR BLUEs	38.9384
GID8783655	Iron EYTBW 2021 B2IR BLUEs	38.9351
GID8781376	Iron EYTBW 2021 B2IR BLUEs	38.9234
GID8782823	Iron EYTBW 2021 B2IR BLUEs	38.9233
GID8778456	Iron EYTBW 2021 B2IR BLUEs	38.9139
GID8778359	Iron EYTBW 2021 B2IR BLUEs	38.9089
GID8783330	Iron EYTBW 2021 B2IR BLUEs	38.904
GID8783643	Iron EYTBW 2021 B2IR BLUEs	38.9001
GID8790138	Iron EYTBW 2021 B2IR BLUEs	38.8917
GID8777513	Iron EYTBW 2021 B2IR BLUEs	38.8851
GID8786042	Iron EYTBW 2021 B2IR BLUEs	38.8803
GID8778770	Iron EYTBW 2021 B2IR BLUEs	38.8722
GID8783228	Iron EYTBW 2021 B2IR BLUEs	38.869
GID8777546	Iron EYTBW 2021 B2IR BLUEs	38.8651
GID8790177	Iron EYTBW 2021 B2IR BLUEs	38.8567
GID8780633	Iron EYTBW 2021 B2IR BLUEs	38.8565
GID8789885	Iron EYTBW 2021 B2IR BLUEs	38.8538
GID8781329	Iron EYTBW 2021 B2IR BLUEs	38.8534
GID8782948	Iron EYTBW 2021 B2IR BLUEs	38.8533
GID8778525	Iron EYTBW 2021 B2IR BLUEs	38.8489
GID8782921	Iron EYTBW 2021 B2IR BLUEs	38.8483
GID8790313	Iron EYTBW 2021 B2IR BLUEs	38.8467
GID8790335	Iron EYTBW 2021 B2IR BLUEs	38.8417
GID8790315	Iron EYTBW 2021 B2IR BLUEs	38.8367
GID8780851	Iron EYTBW 2021 B2IR BLUEs	38.8322
GID8778514	Iron EYTBW 2021 B2IR BLUEs	38.8288
GID8783176	Iron EYTBW 2021 B2IR BLUEs	38.8283
GID8783664	Iron EYTBW 2021 B2IR BLUEs	38.8251
GID8783279	Iron EYTBW 2021 B2IR BLUEs	38.824
GID8778570	Iron EYTBW 2021 B2IR BLUEs	38.8139
GID8783331	Iron EYTBW 2021 B2IR BLUEs	38.809
GID8778270	Iron EYTBW 2021 B2IR BLUEs	38.8079
GID8790400	Iron EYTBW 2021 B2IR BLUEs	38.8067
GID8785303	Iron EYTBW 2021 B2IR BLUEs	38.8014
GID8782412	Iron EYTBW 2021 B2IR BLUEs	38.7849
GID8785015	Iron EYTBW 2021 B2IR BLUEs	38.7804
GID8782836	Iron EYTBW 2021 B2IR BLUEs	38.7783
GID8779552	Iron EYTBW 2021 B2IR BLUEs	38.7678
GID8783953	Iron EYTBW 2021 B2IR BLUEs	38.7651
GID8783617	Iron EYTBW 2021 B2IR BLUEs	38.7651
GID8790027	Iron EYTBW 2021 B2IR BLUEs	38.7588
GID8790552	Iron EYTBW 2021 B2IR BLUEs	38.7535
GID8785589	Iron EYTBW 2021 B2IR BLUEs	38.7472
GID8778945	Iron EYTBW 2021 B2IR BLUEs	38.7453
GID8784089	Iron EYTBW 2021 B2IR BLUEs	38.7404
GID8779815	Iron EYTBW 2021 B2IR BLUEs	38.7378
GID8781928	Iron EYTBW 2021 B2IR BLUEs	38.7349
GID8781507	Iron EYTBW 2021 B2IR BLUEs	38.7334
GID8780034	Iron EYTBW 2021 B2IR BLUEs	38.7128
GID8785111	Iron EYTBW 2021 B2IR BLUEs	38.7088
GID8777930	Iron EYTBW 2021 B2IR BLUEs	38.7062
GID8791095	Iron EYTBW 2021 B2IR BLUEs	38.7017
GID8778769	Iron EYTBW 2021 B2IR BLUEs	38.6922
GID8784490	Iron EYTBW 2021 B2IR BLUEs	38.6904
GID8778355	Iron EYTBW 2021 B2IR BLUEs	38.6739
GID8778794	Iron EYTBW 2021 B2IR BLUEs	38.6722
GID8784397	Iron EYTBW 2021 B2IR BLUEs	38.6619
GID8778690	Iron EYTBW 2021 B2IR BLUEs	38.6422
GID8784604	Iron EYTBW 2021 B2IR BLUEs	38.6404
GID8783563	Iron EYTBW 2021 B2IR BLUEs	38.639
GID8783201	Iron EYTBW 2021 B2IR BLUEs	38.6383
GID8783014	Iron EYTBW 2021 B2IR BLUEs	38.6383
GID8785988	Iron EYTBW 2021 B2IR BLUEs	38.6369
GID8777860	Iron EYTBW 2021 B2IR BLUEs	38.6312
GID8790650	Iron EYTBW 2021 B2IR BLUEs	38.6185
GID8783886	Iron EYTBW 2021 B2IR BLUEs	38.6101
GID8783469	Iron EYTBW 2021 B2IR BLUEs	38.609
GID8778553	Iron EYTBW 2021 B2IR BLUEs	38.6089
GID8782615	Iron EYTBW 2021 B2IR BLUEs	38.6049
GID8784103	Iron EYTBW 2021 B2IR BLUEs	38.5954
GID8780998	Iron EYTBW 2021 B2IR BLUEs	38.5922
GID8780410	Iron EYTBW 2021 B2IR BLUEs	38.5865
GID8778052	Iron EYTBW 2021 B2IR BLUEs	38.5842
GID8776787	Iron EYTBW 2021 B2IR BLUEs	38.5705
GID8777902	Iron EYTBW 2021 B2IR BLUEs	38.5662
GID8778944	Iron EYTBW 2021 B2IR BLUEs	38.5603
GID8789700	Iron EYTBW 2021 B2IR BLUEs	38.5538
GID8781631	Iron EYTBW 2021 B2IR BLUEs	38.5534
GID8782896	Iron EYTBW 2021 B2IR BLUEs	38.5533
GID8779527	Iron EYTBW 2021 B2IR BLUEs	38.5528
GID8780276	Iron EYTBW 2021 B2IR BLUEs	38.5478
GID8784378	Iron EYTBW 2021 B2IR BLUEs	38.5454
GID8778988	Iron EYTBW 2021 B2IR BLUEs	38.5453
GID8790683	Iron EYTBW 2021 B2IR BLUEs	38.5435
GID8790241	Iron EYTBW 2021 B2IR BLUEs	38.5351
GID8783450	Iron EYTBW 2021 B2IR BLUEs	38.529
GID8780251	Iron EYTBW 2021 B2IR BLUEs	38.5278
GID8776897	Iron EYTBW 2021 B2IR BLUEs	38.5205
GID8783973	Iron EYTBW 2021 B2IR BLUEs	38.5201
GID8781629	Iron EYTBW 2021 B2IR BLUEs	38.5184
GID8789929	Iron EYTBW 2021 B2IR BLUEs	38.5138
GID8790946	Iron EYTBW 2021 B2IR BLUEs	38.5085
GID8782390	Iron EYTBW 2021 B2IR BLUEs	38.5049
GID8782377	Iron EYTBW 2021 B2IR BLUEs	38.4999
GID8776784	Iron EYTBW 2021 B2IR BLUEs	38.4955
GID8781868	Iron EYTBW 2021 B2IR BLUEs	38.4949
GID8777803	Iron EYTBW 2021 B2IR BLUEs	38.4819
GID8780962	Iron EYTBW 2021 B2IR BLUEs	38.4772
GID8778334	Iron EYTBW 2021 B2IR BLUEs	38.4742
GID8778622	Iron EYTBW 2021 B2IR BLUEs	38.4739
GID8782985	Iron EYTBW 2021 B2IR BLUEs	38.4733
GID8778609	Iron EYTBW 2021 B2IR BLUEs	38.4688
GID8777720	Iron EYTBW 2021 B2IR BLUEs	38.4562
GID8778522	Iron EYTBW 2021 B2IR BLUEs	38.4538
GID8785045	Iron EYTBW 2021 B2IR BLUEs	38.4519
GID8778576	Iron EYTBW 2021 B2IR BLUEs	38.4439
GID8789786	Iron EYTBW 2021 B2IR BLUEs	38.4388
GID8778594	Iron EYTBW 2021 B2IR BLUEs	38.4339
GID8785358	Iron EYTBW 2021 B2IR BLUEs	38.4264
GID8784539	Iron EYTBW 2021 B2IR BLUEs	38.4254
GID8781788	Iron EYTBW 2021 B2IR BLUEs	38.4234
GID8790751	Iron EYTBW 2021 B2IR BLUEs	38.4185
GID8785115	Iron EYTBW 2021 B2IR BLUEs	38.4154
GID8779430	Iron EYTBW 2021 B2IR BLUEs	38.4103
GID8785862	Iron EYTBW 2021 B2IR BLUEs	38.4014
GID8783677	Iron EYTBW 2021 B2IR BLUEs	38.4001
GID8782968	Iron EYTBW 2021 B2IR BLUEs	38.3983
GID8778843	Iron EYTBW 2021 B2IR BLUEs	38.3972
GID8790634	Iron EYTBW 2021 B2IR BLUEs	38.3935
GID8777289	Iron EYTBW 2021 B2IR BLUEs	38.3601
GID8790532	Iron EYTBW 2021 B2IR BLUEs	38.3485
GID8778722	Iron EYTBW 2021 B2IR BLUEs	38.3422
GID8778420	Iron EYTBW 2021 B2IR BLUEs	38.3389
GID8790311	Iron EYTBW 2021 B2IR BLUEs	38.3267
GID8783786	Iron EYTBW 2021 B2IR BLUEs	38.3201
GID8790317	Iron EYTBW 2021 B2IR BLUEs	38.3167
GID8777843	Iron EYTBW 2021 B2IR BLUEs	38.3162
GID8783051	Iron EYTBW 2021 B2IR BLUEs	38.3133
GID8778316	Iron EYTBW 2021 B2IR BLUEs	38.3092
GID8778595	Iron EYTBW 2021 B2IR BLUEs	38.3089
GID8780964	Iron EYTBW 2021 B2IR BLUEs	38.3072
GID8784405	Iron EYTBW 2021 B2IR BLUEs	38.3069
GID8789808	Iron EYTBW 2021 B2IR BLUEs	38.2988
GID8784812	Iron EYTBW 2021 B2IR BLUEs	38.2964
GID8778252	Iron EYTBW 2021 B2IR BLUEs	38.2942
GID8778010	Iron EYTBW 2021 B2IR BLUEs	38.2862
GID8784147	Iron EYTBW 2021 B2IR BLUEs	38.2854
GID8780822	Iron EYTBW 2021 B2IR BLUEs	38.2853
GID8790548	Iron EYTBW 2021 B2IR BLUEs	38.2835
GID8781280	Iron EYTBW 2021 B2IR BLUEs	38.2834
GID8778600	Iron EYTBW 2021 B2IR BLUEs	38.2788
GID8790445	Iron EYTBW 2021 B2IR BLUEs	38.2667
GID8777909	Iron EYTBW 2021 B2IR BLUEs	38.2512
GID8777838	Iron EYTBW 2021 B2IR BLUEs	38.2512
GID8783893	Iron EYTBW 2021 B2IR BLUEs	38.2447
GID8789804	Iron EYTBW 2021 B2IR BLUEs	38.2438
GID8778150	Iron EYTBW 2021 B2IR BLUEs	38.2392
GID8777448	Iron EYTBW 2021 B2IR BLUEs	38.2351
GID8779055	Iron EYTBW 2021 B2IR BLUEs	38.2253
GID8783949	Iron EYTBW 2021 B2IR BLUEs	38.2251
GID8784068	Iron EYTBW 2021 B2IR BLUEs	38.2154
GID8777506	Iron EYTBW 2021 B2IR BLUEs	38.2119
GID8780661	Iron EYTBW 2021 B2IR BLUEs	38.2115
GID8790929	Iron EYTBW 2021 B2IR BLUEs	38.2085
GID8778885	Iron EYTBW 2021 B2IR BLUEs	38.2072
GID8783587	Iron EYTBW 2021 B2IR BLUEs	38.2051
GID8783439	Iron EYTBW 2021 B2IR BLUEs	38.194
GID8782880	Iron EYTBW 2021 B2IR BLUEs	38.1883
GID8785525	Iron EYTBW 2021 B2IR BLUEs	38.1864
GID8781414	Iron EYTBW 2021 B2IR BLUEs	38.1834
GID8780801	Iron EYTBW 2021 B2IR BLUEs	38.1753
GID8783377	Iron EYTBW 2021 B2IR BLUEs	38.174
GID8778453	Iron EYTBW 2021 B2IR BLUEs	38.1739
GID8778236	Iron EYTBW 2021 B2IR BLUEs	38.1542
GID8783400	Iron EYTBW 2021 B2IR BLUEs	38.154
GID8779344	Iron EYTBW 2021 B2IR BLUEs	38.1503
GID8785530	Iron EYTBW 2021 B2IR BLUEs	38.1464
GID8790790	Iron EYTBW 2021 B2IR BLUEs	38.1435
GID8782428	Iron EYTBW 2021 B2IR BLUEs	38.1399
GID8778050	Iron EYTBW 2021 B2IR BLUEs	38.1392
GID8777842	Iron EYTBW 2021 B2IR BLUEs	38.1362
GID8780452	Iron EYTBW 2021 B2IR BLUEs	38.1315
GID8785867	Iron EYTBW 2021 B2IR BLUEs	38.1314
GID8781055	Iron EYTBW 2021 B2IR BLUEs	38.1222
GID8790759	Iron EYTBW 2021 B2IR BLUEs	38.1135
GID8785804	Iron EYTBW 2021 B2IR BLUEs	38.1114
GID8778335	Iron EYTBW 2021 B2IR BLUEs	38.0939
GID8790957	Iron EYTBW 2021 B2IR BLUEs	38.0935
GID8777795	Iron EYTBW 2021 B2IR BLUEs	38.0912
GID8790784	Iron EYTBW 2021 B2IR BLUEs	38.0885
GID8781322	Iron EYTBW 2021 B2IR BLUEs	38.0834
GID8782620	Iron EYTBW 2021 B2IR BLUEs	38.0749
GID8784135	Iron EYTBW 2021 B2IR BLUEs	38.0652
GID8784784	Iron EYTBW 2021 B2IR BLUEs	38.0514
GID8777734	Iron EYTBW 2021 B2IR BLUEs	38.0512
GID8778285	Iron EYTBW 2021 B2IR BLUEs	38.0442
GID8781557	Iron EYTBW 2021 B2IR BLUEs	38.0434
GID8790333	Iron EYTBW 2021 B2IR BLUEs	38.0367
GID8790103	Iron EYTBW 2021 B2IR BLUEs	38.0367
GID8782888	Iron EYTBW 2021 B2IR BLUEs	38.0333
GID8778327	Iron EYTBW 2021 B2IR BLUEs	38.0242
GID8778248	Iron EYTBW 2021 B2IR BLUEs	38.0192
GID8781927	Iron EYTBW 2021 B2IR BLUEs	38.0149
GID8790498	Iron EYTBW 2021 B2IR BLUEs	38.0117
GID8778577	Iron EYTBW 2021 B2IR BLUEs	38.0039
GID8780255	Iron EYTBW 2021 B2IR BLUEs	37.9978
GID8785518	Iron EYTBW 2021 B2IR BLUEs	37.9914
GID8780629	Iron EYTBW 2021 B2IR BLUEs	37.9815
GID8777756	Iron EYTBW 2021 B2IR BLUEs	37.9562
GID8790778	Iron EYTBW 2021 B2IR BLUEs	37.9435
GID8778130	Iron EYTBW 2021 B2IR BLUEs	37.9392
GID8790936	Iron EYTBW 2021 B2IR BLUEs	37.9335
GID8783481	Iron EYTBW 2021 B2IR BLUEs	37.929
GID8781194	Iron EYTBW 2021 B2IR BLUEs	37.9284
GID8783100	Iron EYTBW 2021 B2IR BLUEs	37.9283
GID8779633	Iron EYTBW 2021 B2IR BLUEs	37.9278
GID8776490	Iron EYTBW 2021 B2IR BLUEs	37.9265
GID8780556	Iron EYTBW 2021 B2IR BLUEs	37.9215
GID8781888	Iron EYTBW 2021 B2IR BLUEs	37.9199
GID8790025	Iron EYTBW 2021 B2IR BLUEs	37.9188
GID8777722	Iron EYTBW 2021 B2IR BLUEs	37.9112
GID8777419	Iron EYTBW 2021 B2IR BLUEs	37.9088
GID8781780	Iron EYTBW 2021 B2IR BLUEs	37.9084
GID8783235	Iron EYTBW 2021 B2IR BLUEs	37.894
GID8785802	Iron EYTBW 2021 B2IR BLUEs	37.8814
GID8784940	Iron EYTBW 2021 B2IR BLUEs	37.8769
GID8785855	Iron EYTBW 2021 B2IR BLUEs	37.8714
GID8782290	Iron EYTBW 2021 B2IR BLUEs	37.8699
GID8789952	Iron EYTBW 2021 B2IR BLUEs	37.8588
GID8781175	Iron EYTBW 2021 B2IR BLUEs	37.8484
GID8783043	Iron EYTBW 2021 B2IR BLUEs	37.8483
GID8785878	Iron EYTBW 2021 B2IR BLUEs	37.8464
GID8777221	Iron EYTBW 2021 B2IR BLUEs	37.8455
GID8777360	Iron EYTBW 2021 B2IR BLUEs	37.8451
GID8791084	Iron EYTBW 2021 B2IR BLUEs	37.8335
GID8779366	Iron EYTBW 2021 B2IR BLUEs	37.8303
GID8781373	Iron EYTBW 2021 B2IR BLUEs	37.8234
GID8784403	Iron EYTBW 2021 B2IR BLUEs	37.8219
GID8777796	Iron EYTBW 2021 B2IR BLUEs	37.8162
GID8778641	Iron EYTBW 2021 B2IR BLUEs	37.8139
GID8785032	Iron EYTBW 2021 B2IR BLUEs	37.8104
GID8781328	Iron EYTBW 2021 B2IR BLUEs	37.8084
GID8779684	Iron EYTBW 2021 B2IR BLUEs	37.8078
GID8776510	Iron EYTBW 2021 B2IR BLUEs	37.8065
GID8777197	Iron EYTBW 2021 B2IR BLUEs	37.8055
GID8785459	Iron EYTBW 2021 B2IR BLUEs	37.8014
GID8790862	Iron EYTBW 2021 B2IR BLUEs	37.7885
GID8782885	Iron EYTBW 2021 B2IR BLUEs	37.7883
GID8784593	Iron EYTBW 2021 B2IR BLUEs	37.7854
GID8777498	Iron EYTBW 2021 B2IR BLUEs	37.7801
GID8778264	Iron EYTBW 2021 B2IR BLUEs	37.7792
GID8781323	Iron EYTBW 2021 B2IR BLUEs	37.7734
GID8780395	Iron EYTBW 2021 B2IR BLUEs	37.7715
GID8783992	Iron EYTBW 2021 B2IR BLUEs	37.7651
GID8790280	Iron EYTBW 2021 B2IR BLUEs	37.7617
GID8782714	Iron EYTBW 2021 B2IR BLUEs	37.7583
GID8785520	Iron EYTBW 2021 B2IR BLUEs	37.7464
GID8781737	Iron EYTBW 2021 B2IR BLUEs	37.7312
GID8776496	Iron EYTBW 2021 B2IR BLUEs	37.7115
GID8790752	Iron EYTBW 2021 B2IR BLUEs	37.6985
GID8777710	Iron EYTBW 2021 B2IR BLUEs	37.6912
GID8781997	Iron EYTBW 2021 B2IR BLUEs	37.6899
GID8783405	Iron EYTBW 2021 B2IR BLUEs	37.689
GID8780445	Iron EYTBW 2021 B2IR BLUEs	37.6865
GID8777918	Iron EYTBW 2021 B2IR BLUEs	37.6862
GID8779464	Iron EYTBW 2021 B2IR BLUEs	37.6853
GID8790657	Iron EYTBW 2021 B2IR BLUEs	37.6835
GID8790143	Iron EYTBW 2021 B2IR BLUEs	37.6667
GID8783699	Iron EYTBW 2021 B2IR BLUEs	37.6601
GID8778508	Iron EYTBW 2021 B2IR BLUEs	37.6539
GID8782625	Iron EYTBW 2021 B2IR BLUEs	37.6399
GID8781887	Iron EYTBW 2021 B2IR BLUEs	37.6299
GID8777900	Iron EYTBW 2021 B2IR BLUEs	37.6262
GID8782341	Iron EYTBW 2021 B2IR BLUEs	37.6199
GID8778235	Iron EYTBW 2021 B2IR BLUEs	37.6042
GID8781346	Iron EYTBW 2021 B2IR BLUEs	37.5984
GID8784017	Iron EYTBW 2021 B2IR BLUEs	37.5804
GID8784615	Iron EYTBW 2021 B2IR BLUEs	37.5604
GID8781418	Iron EYTBW 2021 B2IR BLUEs	37.5584
GID8777827	Iron EYTBW 2021 B2IR BLUEs	37.5562
GID8790753	Iron EYTBW 2021 B2IR BLUEs	37.5535
GID8785203	Iron EYTBW 2021 B2IR BLUEs	37.5488
GID8783595	Iron EYTBW 2021 B2IR BLUEs	37.5455
GID8785483	Iron EYTBW 2021 B2IR BLUEs	37.5364
GID8790029	Iron EYTBW 2021 B2IR BLUEs	37.5288
GID8783118	Iron EYTBW 2021 B2IR BLUEs	37.5267
GID8785502	Iron EYTBW 2021 B2IR BLUEs	37.5164
GID8783243	Iron EYTBW 2021 B2IR BLUEs	37.514
GID8778713	Iron EYTBW 2021 B2IR BLUEs	37.5072
GID8776817	Iron EYTBW 2021 B2IR BLUEs	37.5055
GID8783175	Iron EYTBW 2021 B2IR BLUEs	37.5033
GID8790145	Iron EYTBW 2021 B2IR BLUEs	37.5017
GID8790173	Iron EYTBW 2021 B2IR BLUEs	37.4767
GID8784029	Iron EYTBW 2021 B2IR BLUEs	37.4604
GID8790925	Iron EYTBW 2021 B2IR BLUEs	37.4585
GID8777294	Iron EYTBW 2021 B2IR BLUEs	37.4551
GID8778492	Iron EYTBW 2021 B2IR BLUEs	37.4489
GID8782399	Iron EYTBW 2021 B2IR BLUEs	37.4169
GID8781870	Iron EYTBW 2021 B2IR BLUEs	37.3849
GID8780848	Iron EYTBW 2021 B2IR BLUEs	37.3822
GID8783606	Iron EYTBW 2021 B2IR BLUEs	37.3801
GID8790664	Iron EYTBW 2021 B2IR BLUEs	37.3785
GID7627560	Iron EYTBW 2021 B2IR BLUEs	37.3555
GID8784548	Iron EYTBW 2021 B2IR BLUEs	37.3454
GID8783903	Iron EYTBW 2021 B2IR BLUEs	37.3451
GID8778198	Iron EYTBW 2021 B2IR BLUEs	37.3442
GID8785581	Iron EYTBW 2021 B2IR BLUEs	37.3422
GID8777433	Iron EYTBW 2021 B2IR BLUEs	37.3401
GID8783489	Iron EYTBW 2021 B2IR BLUEs	37.334
GID8778520	Iron EYTBW 2021 B2IR BLUEs	37.3339
GID8781901	Iron EYTBW 2021 B2IR BLUEs	37.3299
GID8778123	Iron EYTBW 2021 B2IR BLUEs	37.3242
GID8781353	Iron EYTBW 2021 B2IR BLUEs	37.3134
GID8780450	Iron EYTBW 2021 B2IR BLUEs	37.3115
GID8778699	Iron EYTBW 2021 B2IR BLUEs	37.3072
GID8785053	Iron EYTBW 2021 B2IR BLUEs	37.3069
GID8778187	Iron EYTBW 2021 B2IR BLUEs	37.3042
GID8777919	Iron EYTBW 2021 B2IR BLUEs	37.3012
GID8777916	Iron EYTBW 2021 B2IR BLUEs	37.2962
GID8778148	Iron EYTBW 2021 B2IR BLUEs	37.2792
GID8782693	Iron EYTBW 2021 B2IR BLUEs	37.2783
GID8784031	Iron EYTBW 2021 B2IR BLUEs	37.2704
GID8778879	Iron EYTBW 2021 B2IR BLUEs	37.2672
GID8780403	Iron EYTBW 2021 B2IR BLUEs	37.2565
GID8779695	Iron EYTBW 2021 B2IR BLUEs	37.2428
GID8778179	Iron EYTBW 2021 B2IR BLUEs	37.2392
GID8785175	Iron EYTBW 2021 B2IR BLUEs	37.2354
GID8790821	Iron EYTBW 2021 B2IR BLUEs	37.2335
GID8789984	Iron EYTBW 2021 B2IR BLUEs	37.2288
GID8781408	Iron EYTBW 2021 B2IR BLUEs	37.2184
GID8777212	Iron EYTBW 2021 B2IR BLUEs	37.2055
GID8789894	Iron EYTBW 2021 B2IR BLUEs	37.1938
GID8778584	Iron EYTBW 2021 B2IR BLUEs	37.1938
GID8784781	Iron EYTBW 2021 B2IR BLUEs	37.1914
GID8790705	Iron EYTBW 2021 B2IR BLUEs	37.1885
GID8778607	Iron EYTBW 2021 B2IR BLUEs	37.1839
GID8782309	Iron EYTBW 2021 B2IR BLUEs	37.1799
GID8783685	Iron EYTBW 2021 B2IR BLUEs	37.1701
GID8790299	Iron EYTBW 2021 B2IR BLUEs	37.1643
GID8782415	Iron EYTBW 2021 B2IR BLUEs	37.1619
GID8790551	Iron EYTBW 2021 B2IR BLUEs	37.1585
GID8785727	Iron EYTBW 2021 B2IR BLUEs	37.1519
GID8777866	Iron EYTBW 2021 B2IR BLUEs	37.1462
GID8789983	Iron EYTBW 2021 B2IR BLUEs	37.1388
GID8782205	Iron EYTBW 2021 B2IR BLUEs	37.1349
GID8790288	Iron EYTBW 2021 B2IR BLUEs	37.1167
GID8778437	Iron EYTBW 2021 B2IR BLUEs	37.1039
GID8777880	Iron EYTBW 2021 B2IR BLUEs	37.1012
GID8790117	Iron EYTBW 2021 B2IR BLUEs	37.0917
GID8781524	Iron EYTBW 2021 B2IR BLUEs	37.0834
GID8778139	Iron EYTBW 2021 B2IR BLUEs	37.0592
GID8780780	Iron EYTBW 2021 B2IR BLUEs	37.0565
GID8782056	Iron EYTBW 2021 B2IR BLUEs	37.0549
GID8781168	Iron EYTBW 2021 B2IR BLUEs	37.0434
GID8783218	Iron EYTBW 2021 B2IR BLUEs	37.0383
GID8778761	Iron EYTBW 2021 B2IR BLUEs	37.0272
GID8781699	Iron EYTBW 2021 B2IR BLUEs	37.0184
GID8778884	Iron EYTBW 2021 B2IR BLUEs	37.0122
GID8789754	Iron EYTBW 2021 B2IR BLUEs	37.0038
GID8778758	Iron EYTBW 2021 B2IR BLUEs	37.0022
GID8781355	Iron EYTBW 2021 B2IR BLUEs	36.9934
GID8790341	Iron EYTBW 2021 B2IR BLUEs	36.9917
GID8777886	Iron EYTBW 2021 B2IR BLUEs	36.9862
GID8778358	Iron EYTBW 2021 B2IR BLUEs	36.9739
GID8783198	Iron EYTBW 2021 B2IR BLUEs	36.9683
GID8778776	Iron EYTBW 2021 B2IR BLUEs	36.9622
GID8784735	Iron EYTBW 2021 B2IR BLUEs	36.9054
GID8783748	Iron EYTBW 2021 B2IR BLUEs	36.9051
GID8781935	Iron EYTBW 2021 B2IR BLUEs	36.8899
GID8782409	Iron EYTBW 2021 B2IR BLUEs	36.8849
GID8778371	Iron EYTBW 2021 B2IR BLUEs	36.8839
GID8785451	Iron EYTBW 2021 B2IR BLUEs	36.8764
GID8779458	Iron EYTBW 2021 B2IR BLUEs	36.8653
GID8782424	Iron EYTBW 2021 B2IR BLUEs	36.8649
GID8782298	Iron EYTBW 2021 B2IR BLUEs	36.8599
GID8780516	Iron EYTBW 2021 B2IR BLUEs	36.8565
GID8780465	Iron EYTBW 2021 B2IR BLUEs	36.8465
GID8783971	Iron EYTBW 2021 B2IR BLUEs	36.8451
GID8778292	Iron EYTBW 2021 B2IR BLUEs	36.8392
GID8783465	Iron EYTBW 2021 B2IR BLUEs	36.834
GID8783787	Iron EYTBW 2021 B2IR BLUEs	36.8201
GID8784786	Iron EYTBW 2021 B2IR BLUEs	36.8014
GID8778779	Iron EYTBW 2021 B2IR BLUEs	36.7972
GID8778204	Iron EYTBW 2021 B2IR BLUEs	36.7892
GID8790026	Iron EYTBW 2021 B2IR BLUEs	36.7838
GID8785013	Iron EYTBW 2021 B2IR BLUEs	36.7819
GID8781093	Iron EYTBW 2021 B2IR BLUEs	36.7772
GID8779638	Iron EYTBW 2021 B2IR BLUEs	36.7738
GID8778495	Iron EYTBW 2021 B2IR BLUEs	36.7539
GID8778465	Iron EYTBW 2021 B2IR BLUEs	36.7289
GID8779096	Iron EYTBW 2021 B2IR BLUEs	36.7253
GID8790951	Iron EYTBW 2021 B2IR BLUEs	36.6985
GID8780412	Iron EYTBW 2021 B2IR BLUEs	36.6915
GID8783157	Iron EYTBW 2021 B2IR BLUEs	36.6883
GID8779656	Iron EYTBW 2021 B2IR BLUEs	36.6878
GID8777096	Iron EYTBW 2021 B2IR BLUEs	36.6805
GID8782127	Iron EYTBW 2021 B2IR BLUEs	36.6749
GID8776671	Iron EYTBW 2021 B2IR BLUEs	36.6505
GID8778078	Iron EYTBW 2021 B2IR BLUEs	36.6192
GID8785030	Iron EYTBW 2021 B2IR BLUEs	36.6054
GID8790190	Iron EYTBW 2021 B2IR BLUEs	36.5967
GID8778210	Iron EYTBW 2021 B2IR BLUEs	36.5842
GID8785887	Iron EYTBW 2021 B2IR BLUEs	36.5614
GID8778021	Iron EYTBW 2021 B2IR BLUEs	36.5562
GID8780668	Iron EYTBW 2021 B2IR BLUEs	36.5219
GID8777776	Iron EYTBW 2021 B2IR BLUEs	36.5012
GID8777207	Iron EYTBW 2021 B2IR BLUEs	36.5005
GID8781510	Iron EYTBW 2021 B2IR BLUEs	36.4934
GID8778020	Iron EYTBW 2021 B2IR BLUEs	36.4862
GID8777635	Iron EYTBW 2021 B2IR BLUEs	36.4501
GID8782113	Iron EYTBW 2021 B2IR BLUEs	36.4349
GID8781767	Iron EYTBW 2021 B2IR BLUEs	36.4284
GID8789913	Iron EYTBW 2021 B2IR BLUEs	36.4238
GID8783056	Iron EYTBW 2021 B2IR BLUEs	36.4183
GID8784546	Iron EYTBW 2021 B2IR BLUEs	36.4154
GID8782400	Iron EYTBW 2021 B2IR BLUEs	36.4149
GID8785301	Iron EYTBW 2021 B2IR BLUEs	36.4064
GID8785728	Iron EYTBW 2021 B2IR BLUEs	36.3569
GID8782899	Iron EYTBW 2021 B2IR BLUEs	36.3383
GID8779655	Iron EYTBW 2021 B2IR BLUEs	36.3228
GID8780524	Iron EYTBW 2021 B2IR BLUEs	36.3215
GID8776780	Iron EYTBW 2021 B2IR BLUEs	36.3105
GID8778617	Iron EYTBW 2021 B2IR BLUEs	36.3088
GID8781085	Iron EYTBW 2021 B2IR BLUEs	36.3022
GID8781483	Iron EYTBW 2021 B2IR BLUEs	36.2884
GID8785142	Iron EYTBW 2021 B2IR BLUEs	36.2504
GID8785010	Iron EYTBW 2021 B2IR BLUEs	36.2454
GID8782678	Iron EYTBW 2021 B2IR BLUEs	36.2283
GID8778320	Iron EYTBW 2021 B2IR BLUEs	36.2042
GID8784533	Iron EYTBW 2021 B2IR BLUEs	36.1754
GID8785524	Iron EYTBW 2021 B2IR BLUEs	36.1364
GID8781731	Iron EYTBW 2021 B2IR BLUEs	36.1334
GID8778400	Iron EYTBW 2021 B2IR BLUEs	36.1089
GID8778459	Iron EYTBW 2021 B2IR BLUEs	36.0889
GID8785496	Iron EYTBW 2021 B2IR BLUEs	36.0764
GID8785134	Iron EYTBW 2021 B2IR BLUEs	36.0654
GID8789950	Iron EYTBW 2021 B2IR BLUEs	36.0638
GID8790805	Iron EYTBW 2021 B2IR BLUEs	36.0035
GID8785574	Iron EYTBW 2021 B2IR BLUEs	35.9269
GID8778018	Iron EYTBW 2021 B2IR BLUEs	35.9162
GID8785732	Iron EYTBW 2021 B2IR BLUEs	35.9069
GID8784891	Iron EYTBW 2021 B2IR BLUEs	35.9064
GID8778757	Iron EYTBW 2021 B2IR BLUEs	35.8872
GID8790287	Iron EYTBW 2021 B2IR BLUEs	35.8717
GID8778720	Iron EYTBW 2021 B2IR BLUEs	35.8622
GID8790686	Iron EYTBW 2021 B2IR BLUEs	35.8385
GID8785576	Iron EYTBW 2021 B2IR BLUEs	35.8269
GID8778296	Iron EYTBW 2021 B2IR BLUEs	35.7942
GID8780783	Iron EYTBW 2021 B2IR BLUEs	35.7915
GID8779538	Iron EYTBW 2021 B2IR BLUEs	35.7888
GID8783944	Iron EYTBW 2021 B2IR BLUEs	35.7851
GID8791007	Iron EYTBW 2021 B2IR BLUEs	35.7785
GID8790829	Iron EYTBW 2021 B2IR BLUEs	35.7085
GID8782623	Iron EYTBW 2021 B2IR BLUEs	35.6949
GID8778567	Iron EYTBW 2021 B2IR BLUEs	35.6488
GID8779838	Iron EYTBW 2021 B2IR BLUEs	35.6278
GID8790695	Iron EYTBW 2021 B2IR BLUEs	35.6185
GID8789672	Iron EYTBW 2021 B2IR BLUEs	35.6138
GID8790874	Iron EYTBW 2021 B2IR BLUEs	35.6085
GID8783936	Iron EYTBW 2021 B2IR BLUEs	35.5901
GID8778636	Iron EYTBW 2021 B2IR BLUEs	35.5889
GID8785998	Iron EYTBW 2021 B2IR BLUEs	35.5619
GID8779716	Iron EYTBW 2021 B2IR BLUEs	35.5328
GID8785707	Iron EYTBW 2021 B2IR BLUEs	35.5319
GID8778376	Iron EYTBW 2021 B2IR BLUEs	35.5239
GID8785861	Iron EYTBW 2021 B2IR BLUEs	35.5114
GID8778908	Iron EYTBW 2021 B2IR BLUEs	35.4972
GID8785531	Iron EYTBW 2021 B2IR BLUEs	35.4764
GID8780400	Iron EYTBW 2021 B2IR BLUEs	35.4515
GID8783585	Iron EYTBW 2021 B2IR BLUEs	35.4401
GID8778122	Iron EYTBW 2021 B2IR BLUEs	35.2392
GID8785684	Iron EYTBW 2021 B2IR BLUEs	35.2269
GID8785498	Iron EYTBW 2021 B2IR BLUEs	35.2014
GID8790261	Iron EYTBW 2021 B2IR BLUEs	35.1467
GID8789794	Iron EYTBW 2021 B2IR BLUEs	35.1438
GID8782848	Iron EYTBW 2021 B2IR BLUEs	35.1283
GID8785443	Iron EYTBW 2021 B2IR BLUEs	35.0664
GID8778896	Iron EYTBW 2021 B2IR BLUEs	35.0372
GID8779062	Iron EYTBW 2021 B2IR BLUEs	35.0053
GID8785987	Iron EYTBW 2021 B2IR BLUEs	34.9319
GID8778325	Iron EYTBW 2021 B2IR BLUEs	34.6992
GID8790935	Iron EYTBW 2021 B2IR BLUEs	34.4235
GID8778268	Iron EYTBW 2021 B2IR BLUEs	34.4092
GID8778342	Iron EYTBW 2021 B2IR BLUEs	34.3389
GID8785435	Iron EYTBW 2021 B2IR BLUEs	34.3364
GID8778301	Iron EYTBW 2021 B2IR BLUEs	34.1642
GID8782629	Iron EYTBW 2021 B2IR BLUEs	34.0399
GID8780552	Iron EYTBW 2021 B2IR BLUEs	34.0115
GID8785888	Iron EYTBW 2021 B2IR BLUEs	33.9564
GID8777503	Iron EYTBW 2021 B2IR BLUEs	33.5051
GID8780663	Iron EYTBW 2021 B2IR BLUEs	33.4215
GID8779144	Iron EYTBW 2021 B5IR BLUEs	48.8967
GID8790382	Iron EYTBW 2021 B5IR BLUEs	48.0223
GID8780914	Iron EYTBW 2021 B5IR BLUEs	47.0574
GID8778824	Iron EYTBW 2021 B5IR BLUEs	46.3574
GID8778313	Iron EYTBW 2021 B5IR BLUEs	46.316
GID8780962	Iron EYTBW 2021 B5IR BLUEs	46.1274
GID8779563	Iron EYTBW 2021 B5IR BLUEs	46.109
GID8785514	Iron EYTBW 2021 B5IR BLUEs	46.0959
GID8778692	Iron EYTBW 2021 B5IR BLUEs	45.5874
GID8781588	Iron EYTBW 2021 B5IR BLUEs	45.4889
GID8786002	Iron EYTBW 2021 B5IR BLUEs	45.4107
GID8782885	Iron EYTBW 2021 B5IR BLUEs	45.386
GID8782949	Iron EYTBW 2021 B5IR BLUEs	45.356
GID8776975	Iron EYTBW 2021 B5IR BLUEs	45.0416
GID8784543	Iron EYTBW 2021 B5IR BLUEs	45.0076
GID8781997	Iron EYTBW 2021 B5IR BLUEs	44.9832
GID8777659	Iron EYTBW 2021 B5IR BLUEs	44.8153
GID8782999	Iron EYTBW 2021 B5IR BLUEs	44.691
GID8785571	Iron EYTBW 2021 B5IR BLUEs	44.6507
GID8790668	Iron EYTBW 2021 B5IR BLUEs	44.5543
GID8784068	Iron EYTBW 2021 B5IR BLUEs	44.4926
GID8785569	Iron EYTBW 2021 B5IR BLUEs	44.4457
GID8776530	Iron EYTBW 2021 B5IR BLUEs	44.4101
GID8781524	Iron EYTBW 2021 B5IR BLUEs	44.3989
GID8784103	Iron EYTBW 2021 B5IR BLUEs	44.3926
GID8785521	Iron EYTBW 2021 B5IR BLUEs	44.3709
GID8783327	Iron EYTBW 2021 B5IR BLUEs	44.1428
GID8776485	Iron EYTBW 2021 B5IR BLUEs	44.0751
GID8785045	Iron EYTBW 2021 B5IR BLUEs	44.0657
GID8785379	Iron EYTBW 2021 B5IR BLUEs	44.0409
GID8781789	Iron EYTBW 2021 B5IR BLUEs	43.7639
GID8790288	Iron EYTBW 2021 B5IR BLUEs	43.7123
GID8785921	Iron EYTBW 2021 B5IR BLUEs	43.6709
GID8784985	Iron EYTBW 2021 B5IR BLUEs	43.6576
GID8790103	Iron EYTBW 2021 B5IR BLUEs	43.6323
GID8779267	Iron EYTBW 2021 B5IR BLUEs	43.6317
GID8784405	Iron EYTBW 2021 B5IR BLUEs	43.6057
GID8782690	Iron EYTBW 2021 B5IR BLUEs	43.596
GID8785799	Iron EYTBW 2021 B5IR BLUEs	43.5959
GID8785303	Iron EYTBW 2021 B5IR BLUEs	43.5959
GID8781147	Iron EYTBW 2021 B5IR BLUEs	43.5724
GID8790400	Iron EYTBW 2021 B5IR BLUEs	43.5173
GID8784048	Iron EYTBW 2021 B5IR BLUEs	43.4376
GID8783445	Iron EYTBW 2021 B5IR BLUEs	43.4278
GID8783829	Iron EYTBW 2021 B5IR BLUEs	43.4177
GID8779392	Iron EYTBW 2021 B5IR BLUEs	43.4167
GID8783561	Iron EYTBW 2021 B5IR BLUEs	43.4028
GID8777533	Iron EYTBW 2021 B5IR BLUEs	43.3703
GID8779492	Iron EYTBW 2021 B5IR BLUEs	43.369
GID8778703	Iron EYTBW 2021 B5IR BLUEs	43.3174
GID8783333	Iron EYTBW 2021 B5IR BLUEs	43.3078
GID8778195	Iron EYTBW 2021 B5IR BLUEs	43.296
GID8785712	Iron EYTBW 2021 B5IR BLUEs	43.2807
GID8785301	Iron EYTBW 2021 B5IR BLUEs	43.2659
GID8785010	Iron EYTBW 2021 B5IR BLUEs	43.2176
GID8790287	Iron EYTBW 2021 B5IR BLUEs	43.1973
GID8780961	Iron EYTBW 2021 B5IR BLUEs	43.1624
GID8784001	Iron EYTBW 2021 B5IR BLUEs	43.1477
GID8783617	Iron EYTBW 2021 B5IR BLUEs	43.1427
GID8790379	Iron EYTBW 2021 B5IR BLUEs	43.1223
GID8780746	Iron EYTBW 2021 B5IR BLUEs	43.1217
GID8779147	Iron EYTBW 2021 B5IR BLUEs	43.0917
GID8777798	Iron EYTBW 2021 B5IR BLUEs	43.0907
GID8782069	Iron EYTBW 2021 B5IR BLUEs	43.0782
GID8778336	Iron EYTBW 2021 B5IR BLUEs	43.0313
GID8778686	Iron EYTBW 2021 B5IR BLUEs	42.9974
GID8783336	Iron EYTBW 2021 B5IR BLUEs	42.9328
GID8776500	Iron EYTBW 2021 B5IR BLUEs	42.9051
GID8779153	Iron EYTBW 2021 B5IR BLUEs	42.9017
GID8777198	Iron EYTBW 2021 B5IR BLUEs	42.8816
GID8785993	Iron EYTBW 2021 B5IR BLUEs	42.8707
GID8790244	Iron EYTBW 2021 B5IR BLUEs	42.8673
GID8781791	Iron EYTBW 2021 B5IR BLUEs	42.8339
GID8778473	Iron EYTBW 2021 B5IR BLUEs	42.8263
GID8780398	Iron EYTBW 2021 B5IR BLUEs	42.8151
GID8780556	Iron EYTBW 2021 B5IR BLUEs	42.8051
GID8790258	Iron EYTBW 2021 B5IR BLUEs	42.7923
GID8783775	Iron EYTBW 2021 B5IR BLUEs	42.7827
GID8783973	Iron EYTBW 2021 B5IR BLUEs	42.7777
GID8778319	Iron EYTBW 2021 B5IR BLUEs	42.746
GID8784107	Iron EYTBW 2021 B5IR BLUEs	42.7376
GID8783160	Iron EYTBW 2021 B5IR BLUEs	42.736
GID8786001	Iron EYTBW 2021 B5IR BLUEs	42.7207
GID8782620	Iron EYTBW 2021 B5IR BLUEs	42.7182
GID8781332	Iron EYTBW 2021 B5IR BLUEs	42.7039
GID8782372	Iron EYTBW 2021 B5IR BLUEs	42.6932
GID8781887	Iron EYTBW 2021 B5IR BLUEs	42.6732
GID8783100	Iron EYTBW 2021 B5IR BLUEs	42.661
GID8778300	Iron EYTBW 2021 B5IR BLUEs	42.611
GID8778066	Iron EYTBW 2021 B5IR BLUEs	42.611
GID8783545	Iron EYTBW 2021 B5IR BLUEs	42.6078
GID8778627	Iron EYTBW 2021 B5IR BLUEs	42.5963
GID8783621	Iron EYTBW 2021 B5IR BLUEs	42.5927
GID8784087	Iron EYTBW 2021 B5IR BLUEs	42.5676
GID8778761	Iron EYTBW 2021 B5IR BLUEs	42.5574
GID8790498	Iron EYTBW 2021 B5IR BLUEs	42.5423
GID8777479	Iron EYTBW 2021 B5IR BLUEs	42.5313
GID8779279	Iron EYTBW 2021 B5IR BLUEs	42.5017
GID8782945	Iron EYTBW 2021 B5IR BLUEs	42.496
GID8779152	Iron EYTBW 2021 B5IR BLUEs	42.4567
GID8779482	Iron EYTBW 2021 B5IR BLUEs	42.449
GID8778236	Iron EYTBW 2021 B5IR BLUEs	42.436
GID8785977	Iron EYTBW 2021 B5IR BLUEs	42.4257
GID8785554	Iron EYTBW 2021 B5IR BLUEs	42.4057
GID8776517	Iron EYTBW 2021 B5IR BLUEs	42.3701
GID8790344	Iron EYTBW 2021 B5IR BLUEs	42.3523
GID8782888	Iron EYTBW 2021 B5IR BLUEs	42.336
GID8785063	Iron EYTBW 2021 B5IR BLUEs	42.3276
GID8782390	Iron EYTBW 2021 B5IR BLUEs	42.3082
GID8776550	Iron EYTBW 2021 B5IR BLUEs	42.3051
GID8783572	Iron EYTBW 2021 B5IR BLUEs	42.2977
GID8785457	Iron EYTBW 2021 B5IR BLUEs	42.2759
GID8782192	Iron EYTBW 2021 B5IR BLUEs	42.2532
GID8783449	Iron EYTBW 2021 B5IR BLUEs	42.2528
GID8781081	Iron EYTBW 2021 B5IR BLUEs	42.2524
GID8790713	Iron EYTBW 2021 B5IR BLUEs	42.2393
GID8782950	Iron EYTBW 2021 B5IR BLUEs	42.221
GID8783873	Iron EYTBW 2021 B5IR BLUEs	42.2127
GID8786011	Iron EYTBW 2021 B5IR BLUEs	42.1907
GID8777325	Iron EYTBW 2021 B5IR BLUEs	42.1903
GID8782056	Iron EYTBW 2021 B5IR BLUEs	42.1832
GID8778299	Iron EYTBW 2021 B5IR BLUEs	42.151
GID8778070	Iron EYTBW 2021 B5IR BLUEs	42.136
GID8784091	Iron EYTBW 2021 B5IR BLUEs	42.1226
GID8780907	Iron EYTBW 2021 B5IR BLUEs	42.1174
GID8784542	Iron EYTBW 2021 B5IR BLUEs	42.0976
GID8790275	Iron EYTBW 2021 B5IR BLUEs	42.0873
GID8780220	Iron EYTBW 2021 B5IR BLUEs	42.084
GID8782370	Iron EYTBW 2021 B5IR BLUEs	42.0732
GID8783898	Iron EYTBW 2021 B5IR BLUEs	42.0627
GID8783850	Iron EYTBW 2021 B5IR BLUEs	42.0577
GID8777549	Iron EYTBW 2021 B5IR BLUEs	42.0353
GID8779084	Iron EYTBW 2021 B5IR BLUEs	42.0317
GID8790900	Iron EYTBW 2021 B5IR BLUEs	42.0243
GID8783881	Iron EYTBW 2021 B5IR BLUEs	42.0127
GID8790497	Iron EYTBW 2021 B5IR BLUEs	41.9873
GID8777525	Iron EYTBW 2021 B5IR BLUEs	41.9653
GID8783350	Iron EYTBW 2021 B5IR BLUEs	41.9528
GID8780764	Iron EYTBW 2021 B5IR BLUEs	41.9317
GID8776934	Iron EYTBW 2021 B5IR BLUEs	41.9166
GID8780399	Iron EYTBW 2021 B5IR BLUEs	41.8851
GID7806808	Iron EYTBW 2021 B5IR BLUEs	41.8798
GID8785365	Iron EYTBW 2021 B5IR BLUEs	41.8663
GID8785750	Iron EYTBW 2021 B5IR BLUEs	41.8507
GID8781901	Iron EYTBW 2021 B5IR BLUEs	41.8382
GID8784002	Iron EYTBW 2021 B5IR BLUEs	41.8377
GID8785057	Iron EYTBW 2021 B5IR BLUEs	41.8376
GID8780058	Iron EYTBW 2021 B5IR BLUEs	41.829
GID8780946	Iron EYTBW 2021 B5IR BLUEs	41.8274
GID8784781	Iron EYTBW 2021 B5IR BLUEs	41.8159
GID8779085	Iron EYTBW 2021 B5IR BLUEs	41.7917
GID8778281	Iron EYTBW 2021 B5IR BLUEs	41.716
GID8785538	Iron EYTBW 2021 B5IR BLUEs	41.7107
GID8777274	Iron EYTBW 2021 B5IR BLUEs	41.6953
GID8783465	Iron EYTBW 2021 B5IR BLUEs	41.6728
GID8782051	Iron EYTBW 2021 B5IR BLUEs	41.6682
GID8781148	Iron EYTBW 2021 B5IR BLUEs	41.6624
GID8782588	Iron EYTBW 2021 B5IR BLUEs	41.6482
GID8791095	Iron EYTBW 2021 B5IR BLUEs	41.6473
GID8780745	Iron EYTBW 2021 B5IR BLUEs	41.6457
GID8778355	Iron EYTBW 2021 B5IR BLUEs	41.6413
GID8777027	Iron EYTBW 2021 B5IR BLUEs	41.5666
GID8782047	Iron EYTBW 2021 B5IR BLUEs	41.5507
GID8789904	Iron EYTBW 2021 B5IR BLUEs	41.5463
GID8785544	Iron EYTBW 2021 B5IR BLUEs	41.5357
GID8781427	Iron EYTBW 2021 B5IR BLUEs	41.5189
GID8780252	Iron EYTBW 2021 B5IR BLUEs	41.504
GID8776494	Iron EYTBW 2021 B5IR BLUEs	41.5001
GID8785535	Iron EYTBW 2021 B5IR BLUEs	41.4859
GID8782693	Iron EYTBW 2021 B5IR BLUEs	41.476
GID8778722	Iron EYTBW 2021 B5IR BLUEs	41.4724
GID8785109	Iron EYTBW 2021 B5IR BLUEs	41.4676
GID8779149	Iron EYTBW 2021 B5IR BLUEs	41.4667
GID8778078	Iron EYTBW 2021 B5IR BLUEs	41.466
GID8779461	Iron EYTBW 2021 B5IR BLUEs	41.4617
GID8782379	Iron EYTBW 2021 B5IR BLUEs	41.4532
GID7627560	Iron EYTBW 2021 B5IR BLUEs	41.4528
GID8779462	Iron EYTBW 2021 B5IR BLUEs	41.4467
GID8790197	Iron EYTBW 2021 B5IR BLUEs	41.4423
GID8785543	Iron EYTBW 2021 B5IR BLUEs	41.4257
GID8782899	Iron EYTBW 2021 B5IR BLUEs	41.401
GID8781767	Iron EYTBW 2021 B5IR BLUEs	41.3989
GID8790683	Iron EYTBW 2021 B5IR BLUEs	41.3693
GID8790527	Iron EYTBW 2021 B5IR BLUEs	41.3593
GID8783543	Iron EYTBW 2021 B5IR BLUEs	41.3528
GID8781329	Iron EYTBW 2021 B5IR BLUEs	41.3489
GID8778885	Iron EYTBW 2021 B5IR BLUEs	41.3424
GID8776510	Iron EYTBW 2021 B5IR BLUEs	41.3001
GID8783748	Iron EYTBW 2021 B5IR BLUEs	41.2977
GID8783541	Iron EYTBW 2021 B5IR BLUEs	41.2878
GID8780848	Iron EYTBW 2021 B5IR BLUEs	41.2874
GID8783716	Iron EYTBW 2021 B5IR BLUEs	41.2677
GID8777482	Iron EYTBW 2021 B5IR BLUEs	41.2603
GID8778690	Iron EYTBW 2021 B5IR BLUEs	41.2474
GID8777819	Iron EYTBW 2021 B5IR BLUEs	41.2421
GID8790177	Iron EYTBW 2021 B5IR BLUEs	41.2323
GID8785531	Iron EYTBW 2021 B5IR BLUEs	41.2259
GID8784784	Iron EYTBW 2021 B5IR BLUEs	41.2259
GID8785959	Iron EYTBW 2021 B5IR BLUEs	41.2157
GID8782948	Iron EYTBW 2021 B5IR BLUEs	41.206
GID8777886	Iron EYTBW 2021 B5IR BLUEs	41.1721
GID8777783	Iron EYTBW 2021 B5IR BLUEs	41.1721
GID8778441	Iron EYTBW 2021 B5IR BLUEs	41.1713
GID8781414	Iron EYTBW 2021 B5IR BLUEs	41.1639
GID8778945	Iron EYTBW 2021 B5IR BLUEs	41.1567
GID8779344	Iron EYTBW 2021 B5IR BLUEs	41.1417
GID8777723	Iron EYTBW 2021 B5IR BLUEs	41.1321
GID8790506	Iron EYTBW 2021 B5IR BLUEs	41.1273
GID8785533	Iron EYTBW 2021 B5IR BLUEs	41.1109
GID8784401	Iron EYTBW 2021 B5IR BLUEs	41.1107
GID8785097	Iron EYTBW 2021 B5IR BLUEs	41.1026
GID8778699	Iron EYTBW 2021 B5IR BLUEs	41.0974
GID8780697	Iron EYTBW 2021 B5IR BLUEs	41.0967
GID8753284	Iron EYTBW 2021 B5IR BLUEs	41.0963
GID8786046	Iron EYTBW 2021 B5IR BLUEs	41.0767
GID8782428	Iron EYTBW 2021 B5IR BLUEs	41.0732
GID8778577	Iron EYTBW 2021 B5IR BLUEs	41.0713
GID8782880	Iron EYTBW 2021 B5IR BLUEs	41.071
GID8783102	Iron EYTBW 2021 B5IR BLUEs	41.061
GID8782298	Iron EYTBW 2021 B5IR BLUEs	41.0432
GID8783271	Iron EYTBW 2021 B5IR BLUEs	41.0378
GID8777289	Iron EYTBW 2021 B5IR BLUEs	41.0203
GID8778719	Iron EYTBW 2021 B5IR BLUEs	40.9974
GID8777956	Iron EYTBW 2021 B5IR BLUEs	40.9971
GID8778287	Iron EYTBW 2021 B5IR BLUEs	40.996
GID8782912	Iron EYTBW 2021 B5IR BLUEs	40.976
GID8780224	Iron EYTBW 2021 B5IR BLUEs	40.974
GID8781418	Iron EYTBW 2021 B5IR BLUEs	40.9639
GID8782716	Iron EYTBW 2021 B5IR BLUEs	40.936
GID8782419	Iron EYTBW 2021 B5IR BLUEs	40.9357
GID8783400	Iron EYTBW 2021 B5IR BLUEs	40.9178
GID8790570	Iron EYTBW 2021 B5IR BLUEs	40.9093
GID8776496	Iron EYTBW 2021 B5IR BLUEs	40.8951
GID8783722	Iron EYTBW 2021 B5IR BLUEs	40.8877
GID8778886	Iron EYTBW 2021 B5IR BLUEs	40.8574
GID8776489	Iron EYTBW 2021 B5IR BLUEs	40.8551
GID8783903	Iron EYTBW 2021 B5IR BLUEs	40.8527
GID8785581	Iron EYTBW 2021 B5IR BLUEs	40.8524
GID8781507	Iron EYTBW 2021 B5IR BLUEs	40.8489
GID8781205	Iron EYTBW 2021 B5IR BLUEs	40.8389
GID8776789	Iron EYTBW 2021 B5IR BLUEs	40.8366
GID8779430	Iron EYTBW 2021 B5IR BLUEs	40.8317
GID8781323	Iron EYTBW 2021 B5IR BLUEs	40.8089
GID8781729	Iron EYTBW 2021 B5IR BLUEs	40.7989
GID8780731	Iron EYTBW 2021 B5IR BLUEs	40.7857
GID8783479	Iron EYTBW 2021 B5IR BLUEs	40.7828
GID8780251	Iron EYTBW 2021 B5IR BLUEs	40.779
GID8780406	Iron EYTBW 2021 B5IR BLUEs	40.7751
GID8785840	Iron EYTBW 2021 B5IR BLUEs	40.7659
GID8780873	Iron EYTBW 2021 B5IR BLUEs	40.7424
GID8780452	Iron EYTBW 2021 B5IR BLUEs	40.7401
GID8778002	Iron EYTBW 2021 B5IR BLUEs	40.7321
GID8781795	Iron EYTBW 2021 B5IR BLUEs	40.7282
GID8783628	Iron EYTBW 2021 B5IR BLUEs	40.7277
GID8790304	Iron EYTBW 2021 B5IR BLUEs	40.7173
GID8785992	Iron EYTBW 2021 B5IR BLUEs	40.7157
GID8780412	Iron EYTBW 2021 B5IR BLUEs	40.7151
GID8783570	Iron EYTBW 2021 B5IR BLUEs	40.7078
GID8784403	Iron EYTBW 2021 B5IR BLUEs	40.7007
GID8782341	Iron EYTBW 2021 B5IR BLUEs	40.6782
GID8778586	Iron EYTBW 2021 B5IR BLUEs	40.6713
GID8778345	Iron EYTBW 2021 B5IR BLUEs	40.6713
GID8778327	Iron EYTBW 2021 B5IR BLUEs	40.671
GID8790552	Iron EYTBW 2021 B5IR BLUEs	40.6693
GID8785221	Iron EYTBW 2021 B5IR BLUEs	40.6626
GID8785987	Iron EYTBW 2021 B5IR BLUEs	40.6607
GID8783439	Iron EYTBW 2021 B5IR BLUEs	40.6578
GID8785376	Iron EYTBW 2021 B5IR BLUEs	40.6509
GID8778418	Iron EYTBW 2021 B5IR BLUEs	40.6463
GID8783283	Iron EYTBW 2021 B5IR BLUEs	40.6378
GID8778388	Iron EYTBW 2021 B5IR BLUEs	40.6363
GID8783061	Iron EYTBW 2021 B5IR BLUEs	40.636
GID8783228	Iron EYTBW 2021 B5IR BLUEs	40.6278
GID8789683	Iron EYTBW 2021 B5IR BLUEs	40.6263
GID8785115	Iron EYTBW 2021 B5IR BLUEs	40.6226
GID8777527	Iron EYTBW 2021 B5IR BLUEs	40.6203
GID8781935	Iron EYTBW 2021 B5IR BLUEs	40.6182
GID8783325	Iron EYTBW 2021 B5IR BLUEs	40.6078
GID8783010	Iron EYTBW 2021 B5IR BLUEs	40.596
GID8783886	Iron EYTBW 2021 B5IR BLUEs	40.5877
GID8785142	Iron EYTBW 2021 B5IR BLUEs	40.5826
GID8785545	Iron EYTBW 2021 B5IR BLUEs	40.5807
GID8783427	Iron EYTBW 2021 B5IR BLUEs	40.5778
GID8777950	Iron EYTBW 2021 B5IR BLUEs	40.5771
GID8782424	Iron EYTBW 2021 B5IR BLUEs	40.5632
GID8782835	Iron EYTBW 2021 B5IR BLUEs	40.551
GID8785536	Iron EYTBW 2021 B5IR BLUEs	40.5257
GID8778438	Iron EYTBW 2021 B5IR BLUEs	40.5163
GID8779296	Iron EYTBW 2021 B5IR BLUEs	40.5117
GID8781422	Iron EYTBW 2021 B5IR BLUEs	40.5089
GID8785962	Iron EYTBW 2021 B5IR BLUEs	40.5007
GID8780783	Iron EYTBW 2021 B5IR BLUEs	40.4951
GID8778210	Iron EYTBW 2021 B5IR BLUEs	40.491
GID8779655	Iron EYTBW 2021 B5IR BLUEs	40.489
GID8780240	Iron EYTBW 2021 B5IR BLUEs	40.474
GID8790384	Iron EYTBW 2021 B5IR BLUEs	40.4673
GID8776936	Iron EYTBW 2021 B5IR BLUEs	40.4616
GID8777113	Iron EYTBW 2021 B5IR BLUEs	40.4566
GID8777900	Iron EYTBW 2021 B5IR BLUEs	40.4521
GID8784397	Iron EYTBW 2021 B5IR BLUEs	40.4407
GID8780831	Iron EYTBW 2021 B5IR BLUEs	40.4367
GID8779089	Iron EYTBW 2021 B5IR BLUEs	40.4367
GID8778050	Iron EYTBW 2021 B5IR BLUEs	40.436
GID8776490	Iron EYTBW 2021 B5IR BLUEs	40.4351
GID8783709	Iron EYTBW 2021 B5IR BLUEs	40.4277
GID8784735	Iron EYTBW 2021 B5IR BLUEs	40.4276
GID8778642	Iron EYTBW 2021 B5IR BLUEs	40.4213
GID8778794	Iron EYTBW 2021 B5IR BLUEs	40.4124
GID8781346	Iron EYTBW 2021 B5IR BLUEs	40.4089
GID8777914	Iron EYTBW 2021 B5IR BLUEs	40.4071
GID8777795	Iron EYTBW 2021 B5IR BLUEs	40.4071
GID8777607	Iron EYTBW 2021 B5IR BLUEs	40.4053
GID8783655	Iron EYTBW 2021 B5IR BLUEs	40.4027
GID8779684	Iron EYTBW 2021 B5IR BLUEs	40.394
GID8785888	Iron EYTBW 2021 B5IR BLUEs	40.3909
GID8779055	Iron EYTBW 2021 B5IR BLUEs	40.3867
GID8783450	Iron EYTBW 2021 B5IR BLUEs	40.3778
GID8785823	Iron EYTBW 2021 B5IR BLUEs	40.3709
GID8781590	Iron EYTBW 2021 B5IR BLUEs	40.3539
GID8786042	Iron EYTBW 2021 B5IR BLUEs	40.3517
GID8781355	Iron EYTBW 2021 B5IR BLUEs	40.3489
GID8778743	Iron EYTBW 2021 B5IR BLUEs	40.3213
GID8780838	Iron EYTBW 2021 B5IR BLUEs	40.3117
GID8781802	Iron EYTBW 2021 B5IR BLUEs	40.3032
GID8782309	Iron EYTBW 2021 B5IR BLUEs	40.2982
GID8780243	Iron EYTBW 2021 B5IR BLUEs	40.279
GID8778884	Iron EYTBW 2021 B5IR BLUEs	40.2774
GID8784031	Iron EYTBW 2021 B5IR BLUEs	40.2726
GID8776851	Iron EYTBW 2021 B5IR BLUEs	40.2716
GID8782399	Iron EYTBW 2021 B5IR BLUEs	40.2507
GID8782125	Iron EYTBW 2021 B5IR BLUEs	40.2432
GID8776787	Iron EYTBW 2021 B5IR BLUEs	40.2416
GID8783322	Iron EYTBW 2021 B5IR BLUEs	40.2328
GID8777854	Iron EYTBW 2021 B5IR BLUEs	40.2271
GID8778420	Iron EYTBW 2021 B5IR BLUEs	40.2263
GID8785961	Iron EYTBW 2021 B5IR BLUEs	40.2107
GID8785732	Iron EYTBW 2021 B5IR BLUEs	40.2107
GID8780413	Iron EYTBW 2021 B5IR BLUEs	40.2101
GID8790201	Iron EYTBW 2021 B5IR BLUEs	40.2073
GID8785269	Iron EYTBW 2021 B5IR BLUEs	40.2059
GID8784017	Iron EYTBW 2021 B5IR BLUEs	40.1976
GID8790515	Iron EYTBW 2021 B5IR BLUEs	40.1893
GID8785589	Iron EYTBW 2021 B5IR BLUEs	40.1874
GID8782290	Iron EYTBW 2021 B5IR BLUEs	40.1832
GID8783636	Iron EYTBW 2021 B5IR BLUEs	40.1827
GID8783944	Iron EYTBW 2021 B5IR BLUEs	40.1777
GID8777020	Iron EYTBW 2021 B5IR BLUEs	40.1666
GID8777884	Iron EYTBW 2021 B5IR BLUEs	40.1271
GID8777498	Iron EYTBW 2021 B5IR BLUEs	40.1253
GID8780034	Iron EYTBW 2021 B5IR BLUEs	40.124
GID8781322	Iron EYTBW 2021 B5IR BLUEs	40.1239
GID8785111	Iron EYTBW 2021 B5IR BLUEs	40.1163
GID8778179	Iron EYTBW 2021 B5IR BLUEs	40.116
GID8778465	Iron EYTBW 2021 B5IR BLUEs	40.0963
GID8779458	Iron EYTBW 2021 B5IR BLUEs	40.0917
GID8777487	Iron EYTBW 2021 B5IR BLUEs	40.0903
GID8784370	Iron EYTBW 2021 B5IR BLUEs	40.0876
GID8783044	Iron EYTBW 2021 B5IR BLUEs	40.076
GID8790075	Iron EYTBW 2021 B5IR BLUEs	40.0723
GID8777788	Iron EYTBW 2021 B5IR BLUEs	40.0671
GID8777880	Iron EYTBW 2021 B5IR BLUEs	40.0571
GID8778080	Iron EYTBW 2021 B5IR BLUEs	40.056
GID8780491	Iron EYTBW 2021 B5IR BLUEs	40.0551
GID8785233	Iron EYTBW 2021 B5IR BLUEs	40.0526
GID8784602	Iron EYTBW 2021 B5IR BLUEs	40.0526
GID8782977	Iron EYTBW 2021 B5IR BLUEs	40.051
GID8781888	Iron EYTBW 2021 B5IR BLUEs	40.0132
GID8782911	Iron EYTBW 2021 B5IR BLUEs	40.011
GID8783997	Iron EYTBW 2021 B5IR BLUEs	40.0077
GID8784539	Iron EYTBW 2021 B5IR BLUEs	40.0076
GID8779464	Iron EYTBW 2021 B5IR BLUEs	40.0017
GID8783372	Iron EYTBW 2021 B5IR BLUEs	39.9928
GID8782910	Iron EYTBW 2021 B5IR BLUEs	39.991
GID8783977	Iron EYTBW 2021 B5IR BLUEs	39.9777
GID8777772	Iron EYTBW 2021 B5IR BLUEs	39.9771
GID8784275	Iron EYTBW 2021 B5IR BLUEs	39.9726
GID8782376	Iron EYTBW 2021 B5IR BLUEs	39.9682
GID8777980	Iron EYTBW 2021 B5IR BLUEs	39.9671
GID8778923	Iron EYTBW 2021 B5IR BLUEs	39.9667
GID8780465	Iron EYTBW 2021 B5IR BLUEs	39.9601
GID8776551	Iron EYTBW 2021 B5IR BLUEs	39.9601
GID8782400	Iron EYTBW 2021 B5IR BLUEs	39.9482
GID8789929	Iron EYTBW 2021 B5IR BLUEs	39.9413
GID8782415	Iron EYTBW 2021 B5IR BLUEs	39.9407
GID8782124	Iron EYTBW 2021 B5IR BLUEs	39.9282
GID8790502	Iron EYTBW 2021 B5IR BLUEs	39.9217
GID8780285	Iron EYTBW 2021 B5IR BLUEs	39.919
GID8789960	Iron EYTBW 2021 B5IR BLUEs	39.9163
GID8780221	Iron EYTBW 2021 B5IR BLUEs	39.899
GID8784089	Iron EYTBW 2021 B5IR BLUEs	39.8976
GID8778770	Iron EYTBW 2021 B5IR BLUEs	39.8874
GID8783982	Iron EYTBW 2021 B5IR BLUEs	39.8727
GID8778444	Iron EYTBW 2021 B5IR BLUEs	39.8713
GID8777829	Iron EYTBW 2021 B5IR BLUEs	39.8671
GID8782055	Iron EYTBW 2021 B5IR BLUEs	39.8607
GID8790584	Iron EYTBW 2021 B5IR BLUEs	39.8543
GID8790936	Iron EYTBW 2021 B5IR BLUEs	39.8493
GID8780007	Iron EYTBW 2021 B5IR BLUEs	39.849
GID8790145	Iron EYTBW 2021 B5IR BLUEs	39.8373
GID8776784	Iron EYTBW 2021 B5IR BLUEs	39.8316
GID8783243	Iron EYTBW 2021 B5IR BLUEs	39.8278
GID8776535	Iron EYTBW 2021 B5IR BLUEs	39.8251
GID8785134	Iron EYTBW 2021 B5IR BLUEs	39.8126
GID8785470	Iron EYTBW 2021 B5IR BLUEs	39.8059
GID8779702	Iron EYTBW 2021 B5IR BLUEs	39.804
GID8785726	Iron EYTBW 2021 B5IR BLUEs	39.7757
GID8777909	Iron EYTBW 2021 B5IR BLUEs	39.7721
GID8784900	Iron EYTBW 2021 B5IR BLUEs	39.7409
GID8780410	Iron EYTBW 2021 B5IR BLUEs	39.7201
GID8783468	Iron EYTBW 2021 B5IR BLUEs	39.7178
GID8776788	Iron EYTBW 2021 B5IR BLUEs	39.7166
GID8777866	Iron EYTBW 2021 B5IR BLUEs	39.7121
GID8776976	Iron EYTBW 2021 B5IR BLUEs	39.7016
GID8776728	Iron EYTBW 2021 B5IR BLUEs	39.6966
GID8778371	Iron EYTBW 2021 B5IR BLUEs	39.6963
GID8783426	Iron EYTBW 2021 B5IR BLUEs	39.6928
GID8783338	Iron EYTBW 2021 B5IR BLUEs	39.6928
GID8783948	Iron EYTBW 2021 B5IR BLUEs	39.6927
GID8783014	Iron EYTBW 2021 B5IR BLUEs	39.681
GID8777635	Iron EYTBW 2021 B5IR BLUEs	39.6653
GID8781328	Iron EYTBW 2021 B5IR BLUEs	39.6639
GID8790528	Iron EYTBW 2021 B5IR BLUEs	39.6593
GID8781623	Iron EYTBW 2021 B5IR BLUEs	39.6589
GID8784314	Iron EYTBW 2021 B5IR BLUEs	39.6576
GID8782939	Iron EYTBW 2021 B5IR BLUEs	39.651
GID8780629	Iron EYTBW 2021 B5IR BLUEs	39.6351
GID8783153	Iron EYTBW 2021 B5IR BLUEs	39.611
GID8780400	Iron EYTBW 2021 B5IR BLUEs	39.6101
GID8785459	Iron EYTBW 2021 B5IR BLUEs	39.6059
GID8777993	Iron EYTBW 2021 B5IR BLUEs	39.5921
GID8778325	Iron EYTBW 2021 B5IR BLUEs	39.591
GID8777433	Iron EYTBW 2021 B5IR BLUEs	39.5903
GID8781508	Iron EYTBW 2021 B5IR BLUEs	39.5889
GID8790300	Iron EYTBW 2021 B5IR BLUEs	39.5873
GID8783103	Iron EYTBW 2021 B5IR BLUEs	39.586
GID8790657	Iron EYTBW 2021 B5IR BLUEs	39.5843
GID8778430	Iron EYTBW 2021 B5IR BLUEs	39.5813
GID8777621	Iron EYTBW 2021 B5IR BLUEs	39.5703
GID8783292	Iron EYTBW 2021 B5IR BLUEs	39.5678
GID8783118	Iron EYTBW 2021 B5IR BLUEs	39.5673
GID8780310	Iron EYTBW 2021 B5IR BLUEs	39.564
GID8782586	Iron EYTBW 2021 B5IR BLUEs	39.5582
GID8782377	Iron EYTBW 2021 B5IR BLUEs	39.5432
GID8778553	Iron EYTBW 2021 B5IR BLUEs	39.5413
GID8777294	Iron EYTBW 2021 B5IR BLUEs	39.5403
GID8783470	Iron EYTBW 2021 B5IR BLUEs	39.5378
GID8777196	Iron EYTBW 2021 B5IR BLUEs	39.5216
GID8779285	Iron EYTBW 2021 B5IR BLUEs	39.5167
GID8778359	Iron EYTBW 2021 B5IR BLUEs	39.5113
GID8784378	Iron EYTBW 2021 B5IR BLUEs	39.5076
GID8777374	Iron EYTBW 2021 B5IR BLUEs	39.5003
GID8783373	Iron EYTBW 2021 B5IR BLUEs	39.4978
GID8776498	Iron EYTBW 2021 B5IR BLUEs	39.4901
GID8778292	Iron EYTBW 2021 B5IR BLUEs	39.486
GID8783157	Iron EYTBW 2021 B5IR BLUEs	39.481
GID8790783	Iron EYTBW 2021 B5IR BLUEs	39.4793
GID8785091	Iron EYTBW 2021 B5IR BLUEs	39.4776
GID8790583	Iron EYTBW 2021 B5IR BLUEs	39.4743
GID8779704	Iron EYTBW 2021 B5IR BLUEs	39.474
GID8783559	Iron EYTBW 2021 B5IR BLUEs	39.4628
GID8785525	Iron EYTBW 2021 B5IR BLUEs	39.4609
GID8780851	Iron EYTBW 2021 B5IR BLUEs	39.4574
GID8778316	Iron EYTBW 2021 B5IR BLUEs	39.446
GID8781510	Iron EYTBW 2021 B5IR BLUEs	39.4389
GID8783377	Iron EYTBW 2021 B5IR BLUEs	39.4328
GID8783787	Iron EYTBW 2021 B5IR BLUEs	39.4327
GID8778052	Iron EYTBW 2021 B5IR BLUEs	39.431
GID8777556	Iron EYTBW 2021 B5IR BLUEs	39.4303
GID8789672	Iron EYTBW 2021 B5IR BLUEs	39.4213
GID8785345	Iron EYTBW 2021 B5IR BLUEs	39.4109
GID8784786	Iron EYTBW 2021 B5IR BLUEs	39.4109
GID8784615	Iron EYTBW 2021 B5IR BLUEs	39.4076
GID8784147	Iron EYTBW 2021 B5IR BLUEs	39.4026
GID8779168	Iron EYTBW 2021 B5IR BLUEs	39.4017
GID8778944	Iron EYTBW 2021 B5IR BLUEs	39.3967
GID8782896	Iron EYTBW 2021 B5IR BLUEs	39.396
GID8783595	Iron EYTBW 2021 B5IR BLUEs	39.3927
GID8784604	Iron EYTBW 2021 B5IR BLUEs	39.3826
GID8778129	Iron EYTBW 2021 B5IR BLUEs	39.371
GID8785857	Iron EYTBW 2021 B5IR BLUEs	39.3709
GID8781376	Iron EYTBW 2021 B5IR BLUEs	39.3589
GID8783418	Iron EYTBW 2021 B5IR BLUEs	39.3528
GID8790160	Iron EYTBW 2021 B5IR BLUEs	39.3423
GID8782625	Iron EYTBW 2021 B5IR BLUEs	39.3382
GID8785998	Iron EYTBW 2021 B5IR BLUEs	39.3307
GID8778320	Iron EYTBW 2021 B5IR BLUEs	39.326
GID8784092	Iron EYTBW 2021 B5IR BLUEs	39.3026
GID8782623	Iron EYTBW 2021 B5IR BLUEs	39.2882
GID8790335	Iron EYTBW 2021 B5IR BLUEs	39.2873
GID8777511	Iron EYTBW 2021 B5IR BLUEs	39.2853
GID8783226	Iron EYTBW 2021 B5IR BLUEs	39.2628
GID8790686	Iron EYTBW 2021 B5IR BLUEs	39.2543
GID8781870	Iron EYTBW 2021 B5IR BLUEs	39.2482
GID8785032	Iron EYTBW 2021 B5IR BLUEs	39.2476
GID8790053	Iron EYTBW 2021 B5IR BLUEs	39.2473
GID8778561	Iron EYTBW 2021 B5IR BLUEs	39.2463
GID8777930	Iron EYTBW 2021 B5IR BLUEs	39.2321
GID8785518	Iron EYTBW 2021 B5IR BLUEs	39.2309
GID8781784	Iron EYTBW 2021 B5IR BLUEs	39.2289
GID8784118	Iron EYTBW 2021 B5IR BLUEs	39.2126
GID8782725	Iron EYTBW 2021 B5IR BLUEs	39.211
GID8790341	Iron EYTBW 2021 B5IR BLUEs	39.1973
GID8777756	Iron EYTBW 2021 B5IR BLUEs	39.1821
GID8777506	Iron EYTBW 2021 B5IR BLUEs	39.1757
GID8777083	Iron EYTBW 2021 B5IR BLUEs	39.1716
GID8783331	Iron EYTBW 2021 B5IR BLUEs	39.1678
GID8777775	Iron EYTBW 2021 B5IR BLUEs	39.1671
GID8783402	Iron EYTBW 2021 B5IR BLUEs	39.1628
GID8783437	Iron EYTBW 2021 B5IR BLUEs	39.1607
GID8778908	Iron EYTBW 2021 B5IR BLUEs	39.1424
GID8782412	Iron EYTBW 2021 B5IR BLUEs	39.1382
GID8776780	Iron EYTBW 2021 B5IR BLUEs	39.1316
GID8785529	Iron EYTBW 2021 B5IR BLUEs	39.1309
GID8782369	Iron EYTBW 2021 B5IR BLUEs	39.1182
GID8789984	Iron EYTBW 2021 B5IR BLUEs	39.1113
GID8780403	Iron EYTBW 2021 B5IR BLUEs	39.1051
GID8784312	Iron EYTBW 2021 B5IR BLUEs	39.0876
GID8785948	Iron EYTBW 2021 B5IR BLUEs	39.0859
GID8777704	Iron EYTBW 2021 B5IR BLUEs	39.0853
GID8781381	Iron EYTBW 2021 B5IR BLUEs	39.0839
GID8780799	Iron EYTBW 2021 B5IR BLUEs	39.0817
GID8778758	Iron EYTBW 2021 B5IR BLUEs	39.0724
GID8779695	Iron EYTBW 2021 B5IR BLUEs	39.069
GID8781194	Iron EYTBW 2021 B5IR BLUEs	39.0689
GID8784143	Iron EYTBW 2021 B5IR BLUEs	39.0623
GID8780663	Iron EYTBW 2021 B5IR BLUEs	39.0501
GID8777918	Iron EYTBW 2021 B5IR BLUEs	39.0421
GID8780720	Iron EYTBW 2021 B5IR BLUEs	39.0367
GID8789894	Iron EYTBW 2021 B5IR BLUEs	39.0363
GID8778584	Iron EYTBW 2021 B5IR BLUEs	39.0363
GID8777546	Iron EYTBW 2021 B5IR BLUEs	39.0353
GID8790929	Iron EYTBW 2021 B5IR BLUEs	39.0343
GID8780964	Iron EYTBW 2021 B5IR BLUEs	39.0324
GID8790162	Iron EYTBW 2021 B5IR BLUEs	39.0323
GID8779700	Iron EYTBW 2021 B5IR BLUEs	39.029
GID8779895	Iron EYTBW 2021 B5IR BLUEs	39.024
GID8790101	Iron EYTBW 2021 B5IR BLUEs	38.9973
GID8783664	Iron EYTBW 2021 B5IR BLUEs	38.9927
GID8785707	Iron EYTBW 2021 B5IR BLUEs	38.9907
GID8780291	Iron EYTBW 2021 B5IR BLUEs	38.989
GID8780276	Iron EYTBW 2021 B5IR BLUEs	38.974
GID8783224	Iron EYTBW 2021 B5IR BLUEs	38.9728
GID8789680	Iron EYTBW 2021 B5IR BLUEs	38.9613
GID8779999	Iron EYTBW 2021 B5IR BLUEs	38.959
GID8777470	Iron EYTBW 2021 B5IR BLUEs	38.9553
GID8790048	Iron EYTBW 2021 B5IR BLUEs	38.9473
GID8782746	Iron EYTBW 2021 B5IR BLUEs	38.946
GID8789913	Iron EYTBW 2021 B5IR BLUEs	38.9413
GID8777283	Iron EYTBW 2021 B5IR BLUEs	38.9403
GID8783562	Iron EYTBW 2021 B5IR BLUEs	38.9378
GID8783432	Iron EYTBW 2021 B5IR BLUEs	38.9378
GID8778181	Iron EYTBW 2021 B5IR BLUEs	38.936
GID8785694	Iron EYTBW 2021 B5IR BLUEs	38.9307
GID8778821	Iron EYTBW 2021 B5IR BLUEs	38.9274
GID8777902	Iron EYTBW 2021 B5IR BLUEs	38.9271
GID8780822	Iron EYTBW 2021 B5IR BLUEs	38.9267
GID8783563	Iron EYTBW 2021 B5IR BLUEs	38.9178
GID8778701	Iron EYTBW 2021 B5IR BLUEs	38.9124
GID8779677	Iron EYTBW 2021 B5IR BLUEs	38.909
GID8781408	Iron EYTBW 2021 B5IR BLUEs	38.8989
GID8789667	Iron EYTBW 2021 B5IR BLUEs	38.8913
GID8778946	Iron EYTBW 2021 B5IR BLUEs	38.8867
GID8780552	Iron EYTBW 2021 B5IR BLUEs	38.8851
GID8778918	Iron EYTBW 2021 B5IR BLUEs	38.8817
GID8783828	Iron EYTBW 2021 B5IR BLUEs	38.8679
GID8784313	Iron EYTBW 2021 B5IR BLUEs	38.8676
GID8783348	Iron EYTBW 2021 B5IR BLUEs	38.8628
GID8790089	Iron EYTBW 2021 B5IR BLUEs	38.8623
GID8781280	Iron EYTBW 2021 B5IR BLUEs	38.8589
GID8777353	Iron EYTBW 2021 B5IR BLUEs	38.8403
GID8781731	Iron EYTBW 2021 B5IR BLUEs	38.8389
GID8790753	Iron EYTBW 2021 B5IR BLUEs	38.8293
GID8780801	Iron EYTBW 2021 B5IR BLUEs	38.8267
GID8785855	Iron EYTBW 2021 B5IR BLUEs	38.8259
GID8784961	Iron EYTBW 2021 B5IR BLUEs	38.8207
GID8783557	Iron EYTBW 2021 B5IR BLUEs	38.8178
GID8790299	Iron EYTBW 2021 B5IR BLUEs	38.8173
GID8778453	Iron EYTBW 2021 B5IR BLUEs	38.8113
GID8780104	Iron EYTBW 2021 B5IR BLUEs	38.809
GID8781175	Iron EYTBW 2021 B5IR BLUEs	38.8039
GID8781232	Iron EYTBW 2021 B5IR BLUEs	38.7839
GID8777710	Iron EYTBW 2021 B5IR BLUEs	38.7821
GID8781523	Iron EYTBW 2021 B5IR BLUEs	38.7689
GID8778653	Iron EYTBW 2021 B5IR BLUEs	38.7674
GID7400769	Iron EYTBW 2021 B5IR BLUEs	38.7302
GID8781085	Iron EYTBW 2021 B5IR BLUEs	38.7274
GID8778449	Iron EYTBW 2021 B5IR BLUEs	38.7213
GID8779281	Iron EYTBW 2021 B5IR BLUEs	38.7117
GID8782993	Iron EYTBW 2021 B5IR BLUEs	38.711
GID8776532	Iron EYTBW 2021 B5IR BLUEs	38.7101
GID8790178	Iron EYTBW 2021 B5IR BLUEs	38.7023
GID8790173	Iron EYTBW 2021 B5IR BLUEs	38.7023
GID8790143	Iron EYTBW 2021 B5IR BLUEs	38.7023
GID8780524	Iron EYTBW 2021 B5IR BLUEs	38.7001
GID8780392	Iron EYTBW 2021 B5IR BLUEs	38.694
GID8784931	Iron EYTBW 2021 B5IR BLUEs	38.6926
GID8780995	Iron EYTBW 2021 B5IR BLUEs	38.6824
GID8779985	Iron EYTBW 2021 B5IR BLUEs	38.664
GID8778358	Iron EYTBW 2021 B5IR BLUEs	38.6513
GID8781483	Iron EYTBW 2021 B5IR BLUEs	38.6489
GID8783620	Iron EYTBW 2021 B5IR BLUEs	38.6427
GID8777796	Iron EYTBW 2021 B5IR BLUEs	38.6421
GID8779097	Iron EYTBW 2021 B5IR BLUEs	38.6417
GID8781506	Iron EYTBW 2021 B5IR BLUEs	38.6339
GID8790313	Iron EYTBW 2021 B5IR BLUEs	38.6323
GID8777379	Iron EYTBW 2021 B5IR BLUEs	38.6253
GID8783222	Iron EYTBW 2021 B5IR BLUEs	38.6228
GID8790046	Iron EYTBW 2021 B5IR BLUEs	38.6213
GID8778333	Iron EYTBW 2021 B5IR BLUEs	38.621
GID8778123	Iron EYTBW 2021 B5IR BLUEs	38.616
GID8776501	Iron EYTBW 2021 B5IR BLUEs	38.6051
GID8785949	Iron EYTBW 2021 B5IR BLUEs	38.5959
GID8783469	Iron EYTBW 2021 B5IR BLUEs	38.5928
GID8785520	Iron EYTBW 2021 B5IR BLUEs	38.5909
GID8783587	Iron EYTBW 2021 B5IR BLUEs	38.5877
GID8785443	Iron EYTBW 2021 B5IR BLUEs	38.5859
GID8777197	Iron EYTBW 2021 B5IR BLUEs	38.5766
GID8790414	Iron EYTBW 2021 B5IR BLUEs	38.5723
GID8781204	Iron EYTBW 2021 B5IR BLUEs	38.5689
GID8777862	Iron EYTBW 2021 B5IR BLUEs	38.5621
GID8778600	Iron EYTBW 2021 B5IR BLUEs	38.5563
GID8785802	Iron EYTBW 2021 B5IR BLUEs	38.5559
GID8784135	Iron EYTBW 2021 B5IR BLUEs	38.5476
GID8779062	Iron EYTBW 2021 B5IR BLUEs	38.5467
GID8778330	Iron EYTBW 2021 B5IR BLUEs	38.546
GID8779741	Iron EYTBW 2021 B5IR BLUEs	38.524
GID8781629	Iron EYTBW 2021 B5IR BLUEs	38.5239
GID8785988	Iron EYTBW 2021 B5IR BLUEs	38.5207
GID8783481	Iron EYTBW 2021 B5IR BLUEs	38.5028
GID8780608	Iron EYTBW 2021 B5IR BLUEs	38.4901
GID8778437	Iron EYTBW 2021 B5IR BLUEs	38.4713
GID8777611	Iron EYTBW 2021 B5IR BLUEs	38.4653
GID8780050	Iron EYTBW 2021 B5IR BLUEs	38.449
GID8782135	Iron EYTBW 2021 B5IR BLUEs	38.4482
GID8777860	Iron EYTBW 2021 B5IR BLUEs	38.4371
GID8778285	Iron EYTBW 2021 B5IR BLUEs	38.436
GID8783405	Iron EYTBW 2021 B5IR BLUEs	38.4278
GID8790317	Iron EYTBW 2021 B5IR BLUEs	38.4273
GID8783699	Iron EYTBW 2021 B5IR BLUEs	38.4227
GID8778018	Iron EYTBW 2021 B5IR BLUEs	38.4221
GID8778175	Iron EYTBW 2021 B5IR BLUEs	38.411
GID8780587	Iron EYTBW 2021 B5IR BLUEs	38.4051
GID8781927	Iron EYTBW 2021 B5IR BLUEs	38.3982
GID8782848	Iron EYTBW 2021 B5IR BLUEs	38.396
GID8782778	Iron EYTBW 2021 B5IR BLUEs	38.396
GID8790752	Iron EYTBW 2021 B5IR BLUEs	38.3943
GID8778602	Iron EYTBW 2021 B5IR BLUEs	38.3863
GID8783371	Iron EYTBW 2021 B5IR BLUEs	38.3828
GID8783949	Iron EYTBW 2021 B5IR BLUEs	38.3777
GID8781699	Iron EYTBW 2021 B5IR BLUEs	38.3739
GID8780998	Iron EYTBW 2021 B5IR BLUEs	38.3724
GID8784308	Iron EYTBW 2021 B5IR BLUEs	38.3676
GID8779079	Iron EYTBW 2021 B5IR BLUEs	38.3667
GID8780395	Iron EYTBW 2021 B5IR BLUEs	38.3601
GID8782371	Iron EYTBW 2021 B5IR BLUEs	38.3532
GID8783201	Iron EYTBW 2021 B5IR BLUEs	38.336
GID8785530	Iron EYTBW 2021 B5IR BLUEs	38.3359
GID8779552	Iron EYTBW 2021 B5IR BLUEs	38.329
GID8777200	Iron EYTBW 2021 B5IR BLUEs	38.3266
GID8777273	Iron EYTBW 2021 B5IR BLUEs	38.3216
GID8780181	Iron EYTBW 2021 B5IR BLUEs	38.319
GID8779682	Iron EYTBW 2021 B5IR BLUEs	38.309
GID8783651	Iron EYTBW 2021 B5IR BLUEs	38.3077
GID8776958	Iron EYTBW 2021 B5IR BLUEs	38.3066
GID8777906	Iron EYTBW 2021 B5IR BLUEs	38.2871
GID8779450	Iron EYTBW 2021 B5IR BLUEs	38.2867
GID8783586	Iron EYTBW 2021 B5IR BLUEs	38.2827
GID8777552	Iron EYTBW 2021 B5IR BLUEs	38.2803
GID8790664	Iron EYTBW 2021 B5IR BLUEs	38.2793
GID8782890	Iron EYTBW 2021 B5IR BLUEs	38.271
GID8779656	Iron EYTBW 2021 B5IR BLUEs	38.254
GID8782141	Iron EYTBW 2021 B5IR BLUEs	38.2532
GID8783953	Iron EYTBW 2021 B5IR BLUEs	38.2477
GID8784548	Iron EYTBW 2021 B5IR BLUEs	38.2426
GID8778919	Iron EYTBW 2021 B5IR BLUEs	38.2267
GID8778622	Iron EYTBW 2021 B5IR BLUEs	38.2063
GID8782332	Iron EYTBW 2021 B5IR BLUEs	38.2032
GID8781353	Iron EYTBW 2021 B5IR BLUEs	38.1939
GID8785490	Iron EYTBW 2021 B5IR BLUEs	38.1859
GID8778198	Iron EYTBW 2021 B5IR BLUEs	38.181
GID8786027	Iron EYTBW 2021 B5IR BLUEs	38.1807
GID8780255	Iron EYTBW 2021 B5IR BLUEs	38.174
GID8781788	Iron EYTBW 2021 B5IR BLUEs	38.1739
GID8790529	Iron EYTBW 2021 B5IR BLUEs	38.1693
GID8777776	Iron EYTBW 2021 B5IR BLUEs	38.1621
GID8781168	Iron EYTBW 2021 B5IR BLUEs	38.1439
GID8777842	Iron EYTBW 2021 B5IR BLUEs	38.1371
GID8778634	Iron EYTBW 2021 B5IR BLUEs	38.1363
GID8781557	Iron EYTBW 2021 B5IR BLUEs	38.1289
GID8790309	Iron EYTBW 2021 B5IR BLUEs	38.1273
GID8778720	Iron EYTBW 2021 B5IR BLUEs	38.1224
GID8791007	Iron EYTBW 2021 B5IR BLUEs	38.1093
GID8790315	Iron EYTBW 2021 B5IR BLUEs	38.1023
GID8785203	Iron EYTBW 2021 B5IR BLUEs	38.1013
GID8783056	Iron EYTBW 2021 B5IR BLUEs	38.096
GID8790699	Iron EYTBW 2021 B5IR BLUEs	38.0943
GID8777843	Iron EYTBW 2021 B5IR BLUEs	38.0621
GID8785576	Iron EYTBW 2021 B5IR BLUEs	38.0557
GID8777381	Iron EYTBW 2021 B5IR BLUEs	38.0503
GID8784734	Iron EYTBW 2021 B5IR BLUEs	38.0226
GID8777452	Iron EYTBW 2021 B5IR BLUEs	38.0213
GID8784839	Iron EYTBW 2021 B5IR BLUEs	38.0209
GID8790261	Iron EYTBW 2021 B5IR BLUEs	38.0173
GID8777672	Iron EYTBW 2021 B5IR BLUEs	38.0153
GID8785483	Iron EYTBW 2021 B5IR BLUEs	38.0109
GID8781775	Iron EYTBW 2021 B5IR BLUEs	38.0089
GID8783585	Iron EYTBW 2021 B5IR BLUEs	38.0027
GID8783616	Iron EYTBW 2021 B5IR BLUEs	37.9927
GID8790445	Iron EYTBW 2021 B5IR BLUEs	37.9923
GID8777193	Iron EYTBW 2021 B5IR BLUEs	37.9916
GID8790139	Iron EYTBW 2021 B5IR BLUEs	37.9873
GID8777803	Iron EYTBW 2021 B5IR BLUEs	37.9857
GID8783632	Iron EYTBW 2021 B5IR BLUEs	37.9777
GID8778326	Iron EYTBW 2021 B5IR BLUEs	37.976
GID8789808	Iron EYTBW 2021 B5IR BLUEs	37.9563
GID8778252	Iron EYTBW 2021 B5IR BLUEs	37.956
GID8778148	Iron EYTBW 2021 B5IR BLUEs	37.956
GID8783800	Iron EYTBW 2021 B5IR BLUEs	37.9527
GID8779638	Iron EYTBW 2021 B5IR BLUEs	37.9313
GID8753296	Iron EYTBW 2021 B5IR BLUEs	37.9263
GID8790862	Iron EYTBW 2021 B5IR BLUEs	37.9243
GID8778576	Iron EYTBW 2021 B5IR BLUEs	37.9213
GID8782205	Iron EYTBW 2021 B5IR BLUEs	37.9182
GID8781868	Iron EYTBW 2021 B5IR BLUEs	37.9182
GID8782615	Iron EYTBW 2021 B5IR BLUEs	37.9132
GID8783330	Iron EYTBW 2021 B5IR BLUEs	37.9128
GID8782902	Iron EYTBW 2021 B5IR BLUEs	37.911
GID8783992	Iron EYTBW 2021 B5IR BLUEs	37.8977
GID8790532	Iron EYTBW 2021 B5IR BLUEs	37.8943
GID8778609	Iron EYTBW 2021 B5IR BLUEs	37.8913
GID8782836	Iron EYTBW 2021 B5IR BLUEs	37.881
GID8782678	Iron EYTBW 2021 B5IR BLUEs	37.876
GID8778139	Iron EYTBW 2021 B5IR BLUEs	37.871
GID8790695	Iron EYTBW 2021 B5IR BLUEs	37.8693
GID8778678	Iron EYTBW 2021 B5IR BLUEs	37.8674
GID8785801	Iron EYTBW 2021 B5IR BLUEs	37.8659
GID8780184	Iron EYTBW 2021 B5IR BLUEs	37.859
GID8783279	Iron EYTBW 2021 B5IR BLUEs	37.8328
GID8790935	Iron EYTBW 2021 B5IR BLUEs	37.8143
GID8778713	Iron EYTBW 2021 B5IR BLUEs	37.8124
GID8783639	Iron EYTBW 2021 B5IR BLUEs	37.8027
GID8778495	Iron EYTBW 2021 B5IR BLUEs	37.8013
GID8783936	Iron EYTBW 2021 B5IR BLUEs	37.7977
GID8777703	Iron EYTBW 2021 B5IR BLUEs	37.7903
GID8777932	Iron EYTBW 2021 B5IR BLUEs	37.7871
GID8779979	Iron EYTBW 2021 B5IR BLUEs	37.774
GID8781631	Iron EYTBW 2021 B5IR BLUEs	37.7589
GID8790138	Iron EYTBW 2021 B5IR BLUEs	37.7573
GID8783218	Iron EYTBW 2021 B5IR BLUEs	37.741
GID8785574	Iron EYTBW 2021 B5IR BLUEs	37.7407
GID8785684	Iron EYTBW 2021 B5IR BLUEs	37.7357
GID8790705	Iron EYTBW 2021 B5IR BLUEs	37.7243
GID8783477	Iron EYTBW 2021 B5IR BLUEs	37.7228
GID8777697	Iron EYTBW 2021 B5IR BLUEs	37.7203
GID8777696	Iron EYTBW 2021 B5IR BLUEs	37.7103
GID8785524	Iron EYTBW 2021 B5IR BLUEs	37.7009
GID8777602	Iron EYTBW 2021 B5IR BLUEs	37.6953
GID8785053	Iron EYTBW 2021 B5IR BLUEs	37.6907
GID8779527	Iron EYTBW 2021 B5IR BLUEs	37.684
GID8782921	Iron EYTBW 2021 B5IR BLUEs	37.676
GID8778334	Iron EYTBW 2021 B5IR BLUEs	37.666
GID8776720	Iron EYTBW 2021 B5IR BLUEs	37.6616
GID8776911	Iron EYTBW 2021 B5IR BLUEs	37.6566
GID8789952	Iron EYTBW 2021 B5IR BLUEs	37.6513
GID8790874	Iron EYTBW 2021 B5IR BLUEs	37.6493
GID8782985	Iron EYTBW 2021 B5IR BLUEs	37.646
GID8778241	Iron EYTBW 2021 B5IR BLUEs	37.641
GID8778130	Iron EYTBW 2021 B5IR BLUEs	37.636
GID8781928	Iron EYTBW 2021 B5IR BLUEs	37.6282
GID8783235	Iron EYTBW 2021 B5IR BLUEs	37.6278
GID8778641	Iron EYTBW 2021 B5IR BLUEs	37.6213
GID8781528	Iron EYTBW 2021 B5IR BLUEs	37.6189
GID8781373	Iron EYTBW 2021 B5IR BLUEs	37.6189
GID8780668	Iron EYTBW 2021 B5IR BLUEs	37.6107
GID8777419	Iron EYTBW 2021 B5IR BLUEs	37.5913
GID8785861	Iron EYTBW 2021 B5IR BLUEs	37.5859
GID8785738	Iron EYTBW 2021 B5IR BLUEs	37.5857
GID8777360	Iron EYTBW 2021 B5IR BLUEs	37.5853
GID8783786	Iron EYTBW 2021 B5IR BLUEs	37.5827
GID8783678	Iron EYTBW 2021 B5IR BLUEs	37.5827
GID8783444	Iron EYTBW 2021 B5IR BLUEs	37.5807
GID8778204	Iron EYTBW 2021 B5IR BLUEs	37.576
GID8785862	Iron EYTBW 2021 B5IR BLUEs	37.5759
GID8790241	Iron EYTBW 2021 B5IR BLUEs	37.5527
GID8783971	Iron EYTBW 2021 B5IR BLUEs	37.5377
GID8779838	Iron EYTBW 2021 B5IR BLUEs	37.519
GID8782283	Iron EYTBW 2021 B5IR BLUEs	37.5182
GID8790951	Iron EYTBW 2021 B5IR BLUEs	37.5143
GID8783972	Iron EYTBW 2021 B5IR BLUEs	37.5027
GID8785160	Iron EYTBW 2021 B5IR BLUEs	37.5026
GID8781635	Iron EYTBW 2021 B5IR BLUEs	37.4939
GID8778508	Iron EYTBW 2021 B5IR BLUEs	37.4863
GID8785887	Iron EYTBW 2021 B5IR BLUEs	37.4859
GID8785498	Iron EYTBW 2021 B5IR BLUEs	37.4859
GID8785358	Iron EYTBW 2021 B5IR BLUEs	37.4859
GID8782629	Iron EYTBW 2021 B5IR BLUEs	37.4782
GID8776777	Iron EYTBW 2021 B5IR BLUEs	37.4766
GID8789700	Iron EYTBW 2021 B5IR BLUEs	37.4663
GID8777923	Iron EYTBW 2021 B5IR BLUEs	37.4621
GID8782127	Iron EYTBW 2021 B5IR BLUEs	37.4582
GID8778335	Iron EYTBW 2021 B5IR BLUEs	37.4563
GID8778776	Iron EYTBW 2021 B5IR BLUEs	37.4324
GID8778988	Iron EYTBW 2021 B5IR BLUEs	37.4317
GID8782823	Iron EYTBW 2021 B5IR BLUEs	37.426
GID8791084	Iron EYTBW 2021 B5IR BLUEs	37.4243
GID8783474	Iron EYTBW 2021 B5IR BLUEs	37.4178
GID8782113	Iron EYTBW 2021 B5IR BLUEs	37.4082
GID8784644	Iron EYTBW 2021 B5IR BLUEs	37.3976
GID8790190	Iron EYTBW 2021 B5IR BLUEs	37.3773
GID8778636	Iron EYTBW 2021 B5IR BLUEs	37.3663
GID8781179	Iron EYTBW 2021 B5IR BLUEs	37.3639
GID8789881	Iron EYTBW 2021 B5IR BLUEs	37.3613
GID8778082	Iron EYTBW 2021 B5IR BLUEs	37.341
GID8785438	Iron EYTBW 2021 B5IR BLUEs	37.3359
GID8785015	Iron EYTBW 2021 B5IR BLUEs	37.3326
GID8782373	Iron EYTBW 2021 B5IR BLUEs	37.3282
GID8785728	Iron EYTBW 2021 B5IR BLUEs	37.3257
GID8782409	Iron EYTBW 2021 B5IR BLUEs	37.3132
GID8790551	Iron EYTBW 2021 B5IR BLUEs	37.3093
GID8783043	Iron EYTBW 2021 B5IR BLUEs	37.301
GID8783051	Iron EYTBW 2021 B5IR BLUEs	37.291
GID8785451	Iron EYTBW 2021 B5IR BLUEs	37.2809
GID8778270	Iron EYTBW 2021 B5IR BLUEs	37.271
GID8780522	Iron EYTBW 2021 B5IR BLUEs	37.2651
GID8776712	Iron EYTBW 2021 B5IR BLUEs	37.2616
GID8790027	Iron EYTBW 2021 B5IR BLUEs	37.2613
GID8789701	Iron EYTBW 2021 B5IR BLUEs	37.2363
GID8778525	Iron EYTBW 2021 B5IR BLUEs	37.2263
GID8783643	Iron EYTBW 2021 B5IR BLUEs	37.2227
GID8783593	Iron EYTBW 2021 B5IR BLUEs	37.2127
GID8780780	Iron EYTBW 2021 B5IR BLUEs	37.2001
GID8784029	Iron EYTBW 2021 B5IR BLUEs	37.1876
GID8779661	Iron EYTBW 2021 B5IR BLUEs	37.184
GID8785502	Iron EYTBW 2021 B5IR BLUEs	37.1559
GID8790280	Iron EYTBW 2021 B5IR BLUEs	37.1473
GID8781055	Iron EYTBW 2021 B5IR BLUEs	37.1374
GID8783175	Iron EYTBW 2021 B5IR BLUEs	37.116
GID8785435	Iron EYTBW 2021 B5IR BLUEs	37.1159
GID8779498	Iron EYTBW 2021 B5IR BLUEs	37.114
GID8779300	Iron EYTBW 2021 B5IR BLUEs	37.1017
GID8789754	Iron EYTBW 2021 B5IR BLUEs	37.0963
GID8778879	Iron EYTBW 2021 B5IR BLUEs	37.0924
GID8778520	Iron EYTBW 2021 B5IR BLUEs	37.0763
GID8789794	Iron EYTBW 2021 B5IR BLUEs	37.0713
GID8778122	Iron EYTBW 2021 B5IR BLUEs	37.071
GID8790759	Iron EYTBW 2021 B5IR BLUEs	37.0693
GID8785295	Iron EYTBW 2021 B5IR BLUEs	37.0513
GID8780445	Iron EYTBW 2021 B5IR BLUEs	37.0501
GID8785496	Iron EYTBW 2021 B5IR BLUEs	37.0309
GID8790029	Iron EYTBW 2021 B5IR BLUEs	37.0213
GID8780661	Iron EYTBW 2021 B5IR BLUEs	37.0101
GID8783677	Iron EYTBW 2021 B5IR BLUEs	37.0077
GID8778594	Iron EYTBW 2021 B5IR BLUEs	37.0013
GID8785772	Iron EYTBW 2021 B5IR BLUEs	36.9959
GID8777339	Iron EYTBW 2021 B5IR BLUEs	36.9953
GID8784546	Iron EYTBW 2021 B5IR BLUEs	36.9926
GID8776565	Iron EYTBW 2021 B5IR BLUEs	36.9901
GID8784533	Iron EYTBW 2021 B5IR BLUEs	36.9876
GID8777838	Iron EYTBW 2021 B5IR BLUEs	36.9821
GID8790292	Iron EYTBW 2021 B5IR BLUEs	36.9773
GID8790311	Iron EYTBW 2021 B5IR BLUEs	36.9673
GID8781530	Iron EYTBW 2021 B5IR BLUEs	36.9639
GID8790948	Iron EYTBW 2021 B5IR BLUEs	36.9593
GID8784997	Iron EYTBW 2021 B5IR BLUEs	36.9576
GID8778298	Iron EYTBW 2021 B5IR BLUEs	36.951
GID8777722	Iron EYTBW 2021 B5IR BLUEs	36.9421
GID8777221	Iron EYTBW 2021 B5IR BLUEs	36.9266
GID8778020	Iron EYTBW 2021 B5IR BLUEs	36.9071
GID8776906	Iron EYTBW 2021 B5IR BLUEs	36.9066
GID8781963	Iron EYTBW 2021 B5IR BLUEs	36.9032
GID8777448	Iron EYTBW 2021 B5IR BLUEs	36.8953
GID8783544	Iron EYTBW 2021 B5IR BLUEs	36.8928
GID8778595	Iron EYTBW 2021 B5IR BLUEs	36.8863
GID8789734	Iron EYTBW 2021 B5IR BLUEs	36.8413
GID8781780	Iron EYTBW 2021 B5IR BLUEs	36.8339
GID8783489	Iron EYTBW 2021 B5IR BLUEs	36.8328
GID8776671	Iron EYTBW 2021 B5IR BLUEs	36.8216
GID8790885	Iron EYTBW 2021 B5IR BLUEs	36.8143
GID8789669	Iron EYTBW 2021 B5IR BLUEs	36.8113
GID8790790	Iron EYTBW 2021 B5IR BLUEs	36.8093
GID8778779	Iron EYTBW 2021 B5IR BLUEs	36.8024
GID8790800	Iron EYTBW 2021 B5IR BLUEs	36.7943
GID8779096	Iron EYTBW 2021 B5IR BLUEs	36.7917
GID8778514	Iron EYTBW 2021 B5IR BLUEs	36.7713
GID8790693	Iron EYTBW 2021 B5IR BLUEs	36.7693
GID8785804	Iron EYTBW 2021 B5IR BLUEs	36.7659
GID8778769	Iron EYTBW 2021 B5IR BLUEs	36.7624
GID8778479	Iron EYTBW 2021 B5IR BLUEs	36.7613
GID8778187	Iron EYTBW 2021 B5IR BLUEs	36.756
GID8776768	Iron EYTBW 2021 B5IR BLUEs	36.7316
GID8777705	Iron EYTBW 2021 B5IR BLUEs	36.7203
GID8784490	Iron EYTBW 2021 B5IR BLUEs	36.7126
GID8779024	Iron EYTBW 2021 B5IR BLUEs	36.6967
GID8785007	Iron EYTBW 2021 B5IR BLUEs	36.6776
GID8777633	Iron EYTBW 2021 B5IR BLUEs	36.6753
GID8778522	Iron EYTBW 2021 B5IR BLUEs	36.6663
GID8790784	Iron EYTBW 2021 B5IR BLUEs	36.6593
GID8780633	Iron EYTBW 2021 B5IR BLUEs	36.6501
GID8777875	Iron EYTBW 2021 B5IR BLUEs	36.6321
GID8785030	Iron EYTBW 2021 B5IR BLUEs	36.6226
GID8782631	Iron EYTBW 2021 B5IR BLUEs	36.611
GID8782981	Iron EYTBW 2021 B5IR BLUEs	36.581
GID8777720	Iron EYTBW 2021 B5IR BLUEs	36.5771
GID8778021	Iron EYTBW 2021 B5IR BLUEs	36.5721
GID8790634	Iron EYTBW 2021 B5IR BLUEs	36.5693
GID8781637	Iron EYTBW 2021 B5IR BLUEs	36.5589
GID8778477	Iron EYTBW 2021 B5IR BLUEs	36.5563
GID8777518	Iron EYTBW 2021 B5IR BLUEs	36.5153
GID8780450	Iron EYTBW 2021 B5IR BLUEs	36.5101
GID8790117	Iron EYTBW 2021 B5IR BLUEs	36.5073
GID8789983	Iron EYTBW 2021 B5IR BLUEs	36.5013
GID8790637	Iron EYTBW 2021 B5IR BLUEs	36.4993
GID8790337	Iron EYTBW 2021 B5IR BLUEs	36.4923
GID8779636	Iron EYTBW 2021 B5IR BLUEs	36.464
GID8785175	Iron EYTBW 2021 B5IR BLUEs	36.4626
GID8779633	Iron EYTBW 2021 B5IR BLUEs	36.459
GID8778301	Iron EYTBW 2021 B5IR BLUEs	36.446
GID8777097	Iron EYTBW 2021 B5IR BLUEs	36.4366
GID8783512	Iron EYTBW 2021 B5IR BLUEs	36.4278
GID8782714	Iron EYTBW 2021 B5IR BLUEs	36.396
GID8777600	Iron EYTBW 2021 B5IR BLUEs	36.3903
GID8778772	Iron EYTBW 2021 B5IR BLUEs	36.3874
GID8790805	Iron EYTBW 2021 B5IR BLUEs	36.3843
GID8783176	Iron EYTBW 2021 B5IR BLUEs	36.381
GID8778235	Iron EYTBW 2021 B5IR BLUEs	36.366
GID8790751	Iron EYTBW 2021 B5IR BLUEs	36.3393
GID8777212	Iron EYTBW 2021 B5IR BLUEs	36.3316
GID8777827	Iron EYTBW 2021 B5IR BLUEs	36.3271
GID8776640	Iron EYTBW 2021 B5IR BLUEs	36.3101
GID8779650	Iron EYTBW 2021 B5IR BLUEs	36.264
GID8778843	Iron EYTBW 2021 B5IR BLUEs	36.1924
GID8790289	Iron EYTBW 2021 B5IR BLUEs	36.1923
GID8781737	Iron EYTBW 2021 B5IR BLUEs	36.1889
GID8790550	Iron EYTBW 2021 B5IR BLUEs	36.1743
GID8778376	Iron EYTBW 2021 B5IR BLUEs	36.1663
GID8790925	Iron EYTBW 2021 B5IR BLUEs	36.1643
GID8785878	Iron EYTBW 2021 B5IR BLUEs	36.1609
GID8790946	Iron EYTBW 2021 B5IR BLUEs	36.1593
GID8783893	Iron EYTBW 2021 B5IR BLUEs	36.1427
GID8790333	Iron EYTBW 2021 B5IR BLUEs	36.1123
GID8784593	Iron EYTBW 2021 B5IR BLUEs	36.1076
GID8777162	Iron EYTBW 2021 B5IR BLUEs	36.1066
GID8778352	Iron EYTBW 2021 B5IR BLUEs	36.1063
GID8778456	Iron EYTBW 2021 B5IR BLUEs	36.0963
GID8778492	Iron EYTBW 2021 B5IR BLUEs	36.0913
GID8778296	Iron EYTBW 2021 B5IR BLUEs	36.091
GID8778459	Iron EYTBW 2021 B5IR BLUEs	36.0863
GID8781093	Iron EYTBW 2021 B5IR BLUEs	36.0524
GID8777513	Iron EYTBW 2021 B5IR BLUEs	36.0353
GID8784181	Iron EYTBW 2021 B5IR BLUEs	36.0176
GID8753285	Iron EYTBW 2021 B5IR BLUEs	36.0163
GID8790806	Iron EYTBW 2021 B5IR BLUEs	36.0093
GID8777349	Iron EYTBW 2021 B5IR BLUEs	36.0053
GID8777207	Iron EYTBW 2021 B5IR BLUEs	35.9966
GID8776897	Iron EYTBW 2021 B5IR BLUEs	35.9966
GID8778570	Iron EYTBW 2021 B5IR BLUEs	35.9963
GID8790266	Iron EYTBW 2021 B5IR BLUEs	35.9873
GID8779397	Iron EYTBW 2021 B5IR BLUEs	35.9867
GID8776817	Iron EYTBW 2021 B5IR BLUEs	35.9766
GID8778617	Iron EYTBW 2021 B5IR BLUEs	35.9513
GID8790650	Iron EYTBW 2021 B5IR BLUEs	35.8943
GID8777354	Iron EYTBW 2021 B5IR BLUEs	35.8753
GID8777505	Iron EYTBW 2021 B5IR BLUEs	35.8553
GID8782416	Iron EYTBW 2021 B5IR BLUEs	35.8282
GID8785013	Iron EYTBW 2021 B5IR BLUEs	35.8157
GID8778607	Iron EYTBW 2021 B5IR BLUEs	35.7913
GID8782968	Iron EYTBW 2021 B5IR BLUEs	35.761
GID8783606	Iron EYTBW 2021 B5IR BLUEs	35.7477
GID8777916	Iron EYTBW 2021 B5IR BLUEs	35.7121
GID8778896	Iron EYTBW 2021 B5IR BLUEs	35.6774
GID8785867	Iron EYTBW 2021 B5IR BLUEs	35.6509
GID8790548	Iron EYTBW 2021 B5IR BLUEs	35.6243
GID8778350	Iron EYTBW 2021 B5IR BLUEs	35.5713
GID8779395	Iron EYTBW 2021 B5IR BLUEs	35.5517
GID8780339	Iron EYTBW 2021 B5IR BLUEs	35.469
GID8785727	Iron EYTBW 2021 B5IR BLUEs	35.4307
GID8790692	Iron EYTBW 2021 B5IR BLUEs	35.4293
[truncated: 17,440 more rows]

## Sheet: Table S2
Micro-nutrient	Dataset	Mean	Standard deviation	Minimum	Maximum	Median	Range
Zinc	YTBW 2020 B5IR BLUEs	39.3	4.3	27	53.3	39.3	26.3
Zinc	YTBW 2021 B5IR BLUEs	41.4	3.4	29.7	53.5	41.2	23.8
Zinc	EYTBW 2021 B2IR BLUEs	39.8	2.6	32.4	49.1	39.6	16.7
Zinc	EYTBW 2021 B5IR BLUEs	43.3	3.4	33	59.1	43.1	26.1
Zinc	EYTBW 2021 SP BLUEs	49	3.3	40	60.1	49	20.1
Zinc	YTZN 2019 B5IR BLUEs	53.5	5.3	36.9	73.3	53.4	36.4
Zinc	YTZN 2020 B5IR BLUEs	52.9	4.7	41.2	64.1	52.7	23
Zinc	YTZN 2021 B5IR BLUEs	55.2	5.4	38.5	74.7	55.2	36.1
Zinc	EYTZN 2020 B5IR BLUEs	55.2	4.7	44.5	70.1	54.9	25.6
Zinc	EYTZN 2021 B5IR BLUEs	54.5	4.5	42.7	67.8	54	25.1
Zinc	PCZN 2018 SP	47.1	4.7	30.8	67.6	46.3	36.8
Zinc	PCZN 2021 SP	43.5	4.4	31	58.5	43.4	27.5
Iron	YTBW 2020 B5IR BLUEs	33.3	2.5	27	42.7	33.2	15.7
Iron	YTBW 2021 B5IR BLUEs	38.9	2.4	31.7	47.2	39	15.5
Iron	EYTBW 2021 B5IR BLUEs	39.3	2.4	29.3	48.9	39.1	19.5
Iron	EYTBW 2021 B2IR BLUEs	39.3	2.2	33.4	53.4	39.1	19.9
Iron	EYTBW 2021 SP BLUEs	38.4	2.5	30.5	46.2	38.3	15.6
Iron	YTZN 2019 B5IR BLUEs	37.1	2.3	30	44.6	37	14.7
Iron	YTZN 2020 B5IR BLUEs	35.8	2.3	29.7	43	35.8	13.3
Iron	YTZN 2021 B5IR BLUEs	41.8	2.8	34.7	51.9	41.6	17.2
Iron	EYTZN 2020 B5IR BLUEs	35.1	2.2	29.7	43.1	35.1	13.5
Iron	EYTZN 2021 B5IR BLUEs	41.9	2.4	36	49.3	41.9	13.3
Iron	PCZN 2021 SP	38.1	3	29.3	52.7	38	23.4

## Sheet: Table S3
Dataset 1	Dataset 2	Pearson's correlations	Correlation between	Within/across year
Zinc YTZN 2019 B5IR Rep 1	Zinc YTZN 2019 B5IR Rep 2	0.58	Replications	Within year
Zinc YTZN 2019 B5IR Rep 1	Zinc YTZN 2019 B5IR Rep 3	0.57	Replications	Within year
Zinc YTZN 2019 B5IR Rep 2	Zinc YTZN 2019 B5IR Rep 3	0.59	Replications	Within year
Iron YTZN 2019 B5IR Rep 1	Iron YTZN 2019 B5IR Rep 2	0.5	Replications	Within year
Iron YTZN 2019 B5IR Rep 1	Iron YTZN 2019 B5IR Rep 3	0.45	Replications	Within year
Iron YTZN 2019 B5IR Rep 2	Iron YTZN 2019 B5IR Rep 3	0.48	Replications	Within year
Iron YTBW 2020 B5IR Rep 1	Iron YTBW 2020 B5IR Rep 2	0.48	Replications	Within year
Zinc YTBW 2020 B5IR Rep 1	Zinc YTBW 2020 B5IR Rep 2	0.7	Replications	Within year
Zinc YTZN 2020 B5IR Rep 1	Zinc YTZN 2020 B5IR Rep 2	0.63	Replications	Within year
Zinc YTZN 2020 B5IR Rep 1	Zinc YTZN 2020 B5IR Rep 3	0.6	Replications	Within year
Zinc YTZN 2020 B5IR Rep 2	Zinc YTZN 2020 B5IR Rep 3	0.61	Replications	Within year
Iron YTZN 2020 B5IR Rep 1	Iron YTZN 2020 B5IR Rep 2	0.51	Replications	Within year
Iron YTZN 2020 B5IR Rep 1	Iron YTZN 2020 B5IR Rep 3	0.51	Replications	Within year
Iron YTZN 2020 B5IR Rep 2	Iron YTZN 2020 B5IR Rep 3	0.52	Replications	Within year
Zinc EYTZN 2020 B5IR Rep 1	Zinc EYTZN 2020 B5IR Rep 2	0.49	Replications	Within year
Zinc EYTZN 2020 B5IR Rep 1	Zinc EYTZN 2020 B5IR Rep 3	0.54	Replications	Within year
Zinc EYTZN 2020 B5IR Rep 2	Zinc EYTZN 2020 B5IR Rep 3	0.54	Replications	Within year
Iron EYTZN 2020 B5IR Rep 1	Iron EYTZN 2020 B5IR Rep 2	0.38	Replications	Within year
Iron EYTZN 2020 B5IR Rep 1	Iron EYTZN 2020 B5IR Rep 3	0.47	Replications	Within year
Iron EYTZN 2020 B5IR Rep 2	Iron EYTZN 2020 B5IR Rep 3	0.46	Replications	Within year
Iron EYTBW 2021 B2IR Rep 1	Iron EYTBW 2021 B2IR Rep 2	0.26	Replications	Within year
Iron EYTBW 2021 B5IR Rep 1	Iron EYTBW 2021 B5IR Rep 2	0.39	Replications	Within year
Iron EYTBW 2021 SP Rep 1	Iron EYTBW 2021 SP Rep 2	0.4	Replications	Within year
Zinc EYTBW 2021 B2IR Rep 1	Zinc EYTBW 2021 B2IR Rep 2	0.43	Replications	Within year
Zinc EYTBW 2021 B5IR Rep 1	Zinc EYTBW 2021 B5IR Rep 2	0.48	Replications	Within year
Zinc EYTBW 2021 SP Rep 1	Zinc EYTBW 2021 SP Rep 2	0.44	Replications	Within year
Zinc YTBW 2021 B5IR Rep 1	Zinc YTBW 2021 B5IR Rep 2	0.61	Replications	Within year
Iron YTBW 2021 B5IR Rep 1	Iron YTBW 2021 B5IR Rep 2	0.35	Replications	Within year
Zinc YTZN 2021 B5IR Rep 1	Zinc YTZN 2021 B5IR Rep 2	0.63	Replications	Within year
Iron YTZN 2021 B5IR Rep 1	Iron YTZN 2021 B5IR Rep 2	0.46	Replications	Within year
Zinc EYTZN 2021 B5IR Rep 1	Zinc EYTZN 2021 B5IR Rep 2	0.49	Replications	Within year
Iron EYTZN 2021 B5IR Rep 1	Iron EYTZN 2021 B5IR Rep 2	0.42	Replications	Within year
Zinc EYTBW 2021 B2IR BLUEs	Zinc EYTBW 2021 SP BLUEs	0.43	Zinc content in different environments	Within year
Zinc EYTBW 2021 B5IR BLUEs	Zinc EYTBW 2021 SP BLUEs	0.46	Zinc content in different environments	Within year
Zinc EYTBW 2021 B5IR BLUEs	Zinc EYTBW 2021 B2IR BLUEs	0.43	Zinc content in different environments	Within year
Zinc YTZN 2019 B5IR BLUEs	Zinc PCZN 2018 SP Rep 1	0.3	Zinc content in different environments	Across years
Zinc EYTZN 2020 B5IR BLUEs	Zinc YTZN 2019 B5IR BLUEs	0.39	Zinc content in different environments	Across years
Zinc YTBW 2020 B5IR BLUEs	Zinc EYTBW 2021 B5IR BLUEs	0.45	Zinc content in different environments	Across years
Zinc YTBW 2020 B5IR BLUEs	Zinc EYTBW 2021 B2IR BLUEs	0.26	Zinc content in different environments	Across years
Zinc YTBW 2020 B5IR BLUEs	Zinc EYTBW 2021 SP BLUEs	0.25	Zinc content in different environments	Across years
Zinc YTZN 2020 B5IR BLUEs	Zinc EYTZN 2021 B5IR BLUEs	0.54	Zinc content in different environments	Across years
Zinc EYTZN 2020 B5IR BLUEs	Zinc PCZN 2018 SP Rep 1	0.17	Zinc content in different environments	Across years
Iron EYTBW 2021 B2IR BLUEs	Iron EYTBW 2021 SP BLUEs	0.28	Iron content in different environments	Within year
Iron EYTBW 2021 B5IR BLUEs	Iron EYTBW 2021 SP BLUEs	0.35	Iron content in different environments	Within year
Iron EYTBW 2021 B5IR BLUEs	Iron EYTBW 2021 B2IR BLUEs	0.31	Iron content in different environments	Within year
Iron EYTZN 2020 B5IR BLUEs	Iron YTZN 2019 B5IR BLUEs	0.52	Iron content in different environments	Across years
Iron YTBW 2020 B5IR BLUEs	Iron EYTBW 2021 B5IR BLUEs	0.48	Iron content in different environments	Across years
Iron YTBW 2020 B5IR BLUEs	Iron EYTBW 2021 SP BLUEs	0.39	Iron content in different environments	Across years
Iron YTBW 2020 B5IR BLUEs	Iron EYTBW 2021 B2IR BLUEs	0.36	Iron content in different environments	Across years
Iron YTZN 2020 B5IR BLUEs	Iron EYTZN 2021 B5IR BLUEs	0.37	Iron content in different environments	Across years
Iron YTZN 2019 B5IR BLUEs	Zinc YTZN 2019 B5IR BLUEs	0.52	Zinc and iron content in different environments	Within year
Iron EYTZN 2020 B5IR BLUEs	Zinc EYTZN 2020 B5IR BLUEs	0.52	Zinc and iron content in different environments	Within year
Iron YTBW 2020 B5IR BLUEs	Zinc YTBW 2020 B5IR BLUEs	0.49	Zinc and iron content in different environments	Within year
Iron YTZN 2020 B5IR BLUEs	Zinc YTZN 2020 B5IR BLUEs	0.4	Zinc and iron content in different environments	Within year
Iron EYTBW 2021 B2IR BLUEs	Zinc EYTBW 2021 B2IR BLUEs	0.4	Zinc and iron content in different environments	Within year
Iron EYTBW 2021 B2IR BLUEs	Zinc EYTBW 2021 B5IR BLUEs	0.25	Zinc and iron content in different environments	Within year
Iron EYTBW 2021 B2IR BLUEs	Zinc EYTBW 2021 SP BLUEs	0.12	Zinc and iron content in different environments	Within year
Iron EYTBW 2021 B5IR BLUEs	Zinc EYTBW 2021 B5IR BLUEs	0.64	Zinc and iron content in different environments	Within year
Iron EYTBW 2021 B5IR BLUEs	Zinc EYTBW 2021 SP BLUEs	0.29	Zinc and iron content in different environments	Within year
Iron EYTBW 2021 B5IR BLUEs	Zinc EYTBW 2021 B2IR BLUEs	0.23	Zinc and iron content in different environments	Within year
Iron EYTBW 2021 SP BLUEs	Zinc EYTBW 2021 SP BLUEs	0.43	Zinc and iron content in different environments	Within year
Iron EYTBW 2021 SP BLUEs	Zinc EYTBW 2021 B5IR BLUEs	0.31	Zinc and iron content in different environments	Within year
Iron EYTBW 2021 SP BLUEs	Zinc EYTBW 2021 B2IR BLUEs	0.18	Zinc and iron content in different environments	Within year
Iron EYTZN 2021 B5IR BLUEs	Zinc EYTZN 2021 B5IR BLUEs	0.37	Zinc and iron content in different environments	Within year
Iron PCZN 2021 SP Rep 1	Zinc PCZN 2021 SP Rep 1	0.6	Zinc and iron content in different environments	Within year
Iron YTBW 2021 B5IR BLUEs	Zinc YTBW 2021 B5IR BLUEs	0.6	Zinc and iron content in different environments	Within year
Iron YTZN 2021 B5IR BLUEs	Zinc YTZN 2021 B5IR BLUEs	0.55	Zinc and iron content in different environments	Within year
Iron YTZN 2019 B5IR BLUEs	Zinc EYTZN 2020 B5IR BLUEs	0.2	Zinc and iron content in different environments	Across years
Iron YTZN 2019 B5IR BLUEs	Zinc PCZN 2018 SP Rep 1	0.21	Zinc and iron content in different environments	Across years
Iron EYTZN 2020 B5IR BLUEs	Zinc YTZN 2019 B5IR BLUEs	0.16	Zinc and iron content in different environments	Across years
Iron YTBW 2020 B5IR BLUEs	Zinc EYTBW 2021 B5IR BLUEs	0.39	Zinc and iron content in different environments	Across years
Iron YTBW 2020 B5IR BLUEs	Zinc EYTBW 2021 SP BLUEs	0.28	Zinc and iron content in different environments	Across years
Iron YTBW 2020 B5IR BLUEs	Zinc EYTBW 2021 B2IR BLUEs	0.27	Zinc and iron content in different environments	Across years
Iron YTZN 2020 B5IR BLUEs	Zinc EYTZN 2021 B5IR BLUEs	0.26	Zinc and iron content in different environments	Across years
Iron EYTZN 2020 B5IR BLUEs	Zinc PCZN 2018 SP Rep 1	0.07	Zinc and iron content in different environments	Across years
Iron EYTBW 2021 B2IR BLUEs	Zinc YTBW 2020 B5IR BLUEs	0.24	Zinc and iron content in different environments	Across years
Iron EYTBW 2021 B5IR BLUEs	Zinc YTBW 2020 B5IR BLUEs	0.26	Zinc and iron content in different environments	Across years
Iron EYTBW 2021 SP BLUEs	Zinc YTBW 2020 B5IR BLUEs	0.24	Zinc and iron content in different environments	Across years
Iron EYTZN 2021 B5IR BLUEs	Zinc YTZN 2020 B5IR BLUEs	0.07	Zinc and iron content in different environments	Across years

## Sheet: Table S4
Marker	Chromosome	Position	Dataset	p-value	Significance after Bonferroni correction
1B_625232015	1B	625232015	Iron EYTBW 2021 B2IR BLUEs	7.5231e-06	Significant after Bonferroni correction
1B_631257174	1B	631257174	Iron EYTBW 2021 B2IR Rep 1	1.56e-18	Significant after Bonferroni correction
1B_631257174	1B	631257174	Iron EYTBW 2021 B2IR BLUEs	2.29e-10	Significant after Bonferroni correction
1B_634242993	1B	634242993	Zinc EYTZN 2021 B5IR Rep 1	1.0166e-05	Significant after Bonferroni correction
1B_635977848	1B	635977848	Iron EYTBW 2021 all environments BLUEs	6.3287e-06	Significant after Bonferroni correction
1B_635977848	1B	635977848	Iron EYTBW 2021 B2IR BLUEs	1.2813e-05	Significant after Bonferroni correction
1D_4243791	1D	4243791	Zinc PCZN 2021 SP Rep 1	4.7949e-06	Significant after Bonferroni correction
2A_770713812	2A	770713812	Iron EYTBW 2021 SP Rep 1	1.597e-05	Significant after Bonferroni correction
2B_29873989	2B	29873989	Zinc YTZN 2019 B5IR Rep 1	2.4088e-06	Significant after Bonferroni correction
2B_242990335	2B	242990335	Iron EYTBW 2021 SP BLUEs	3.63e-08	Significant after Bonferroni correction
2B_242990335	2B	242990335	Iron EYTBW 2021 SP Rep 2	1.9204e-06	Significant after Bonferroni correction
2B_602765846	2B	602765846	Iron EYTBW 2021 B5IR Rep 1	6.8855e-06	Significant after Bonferroni correction
2B_694520871	2B	694520871	Iron EYTBW 2021 B2IR BLUEs	1.621e-05	Significant after Bonferroni correction
2D_19472162	2D	19472162	Zinc EYTBW 2021 B2IR BLUEs	1.0197e-06	Significant after Bonferroni correction
2D_19472162	2D	19472162	Zinc EYTBW 2021 B2IR Rep 2	1.8055e-06	Significant after Bonferroni correction
2D_69242948	2D	69242948	Iron YTBW 2020 B5IR BLUEs	3.6402e-06	Significant after Bonferroni correction
2D_284570413	2D	284570413	Iron YTBW 2020 B5IR BLUEs	4.7499e-06	Significant after Bonferroni correction
2D_284570413	2D	284570413	Iron YTBW 2020 B5IR Rep 1	5.7488e-06	Significant after Bonferroni correction
2D_284570413	2D	284570413	Iron combined panel B5IR % check	1.4956e-05	Significant after Bonferroni correction
2D_286384945	2D	286384945	Iron YTBW 2020 B5IR Rep 1	5.3408e-06	Significant after Bonferroni correction
2D_290559279	2D	290559279	Iron YTBW 2020 B5IR Rep 1	3.6568e-06	Significant after Bonferroni correction
2D_290559279	2D	290559279	Iron YTBW 2020 B5IR BLUEs	9.9516e-06	Significant after Bonferroni correction
2D_601567327	2D	601567327	Zinc PCZN 2018 SP Rep 1	3.1182e-05	Significant after Bonferroni correction
3B_71646700	3B	71646700	Iron EYTBW 2021 B2IR Rep 1	5.4427e-06	Significant after Bonferroni correction
3B_756626946	3B	756626946	Zinc YTBW 2020 B5IR BLUEs	9.4472e-06	Significant after Bonferroni correction
3B_794884822	3B	794884822	Iron EYTBW 2021 B2IR BLUEs	5.1261e-06	Significant after Bonferroni correction
3B_825858545	3B	825858545	Iron EYTZN 2020 B5IR Rep 1	5.7063e-06	Significant after Bonferroni correction
4A_672877364	4A	672877364	Zinc YTBW 2021 B5IR Rep 1	2.5679e-05	Significant after Bonferroni correction
4B_14396319	4B	14396319	Iron YTBW 2020 B5IR Rep 1	4.2706e-06	Significant after Bonferroni correction
4B_14653083	4B	14653083	Iron YTBW 2020 B5IR Rep 1	3.709e-06	Significant after Bonferroni correction
4B_20011503	4B	20011503	Iron YTBW 2020 B5IR Rep 1	9.2379e-06	Significant after Bonferroni correction
4B_20011503	4B	20011503	Iron YTBW 2020 B5IR BLUEs	1.5307e-05	Significant after Bonferroni correction
4B_20591269	4B	20591269	Iron YTBW 2020 B5IR BLUEs	8.0501e-06	Significant after Bonferroni correction
4B_20591269	4B	20591269	Iron YTBW 2020 B5IR Rep 1	1.1922e-05	Significant after Bonferroni correction
4B_20679079	4B	20679079	Iron YTBW 2020 B5IR Rep 1	6.8382e-06	Significant after Bonferroni correction
4B_21378087	4B	21378087	Iron YTBW 2020 B5IR BLUEs	9.36e-07	Significant after Bonferroni correction
4B_21379808	4B	21379808	Iron YTBW 2020 B5IR BLUEs	1.0794e-06	Significant after Bonferroni correction
4B_105957097	4B	105957097	Zinc YTZN 2019 B5IR Rep 1	1.0321e-05	Significant after Bonferroni correction
4B_399360686	4B	399360686	Zinc EYTBW 2021 B5IR Rep 2	1.024e-06	Significant after Bonferroni correction
4B_414184900	4B	414184900	Zinc EYTBW 2021 SP Rep 2	1.3973e-05	Significant after Bonferroni correction
4B_536121564	4B	536121564	Zinc EYTBW 2021 B5IR Rep 2	2.1791e-06	Significant after Bonferroni correction
5A_594079971	5A	594079971	Zinc YTBW 2021 B5IR Rep 1	1.9965e-06	Significant after Bonferroni correction
5A_607673246	5A	607673246	Iron EYTBW 2021 all environments BLUEs	7.3232e-06	Significant after Bonferroni correction
5A_608360107	5A	608360107	Iron EYTBW 2021 all environments BLUEs	9.7185e-06	Significant after Bonferroni correction
5B_316011853	5B	316011853	Zinc PCZN 2018 SP Rep 1	2.1144e-05	Significant after Bonferroni correction
5B_571635082	5B	571635082	Zinc EYTBW 2021 SP BLUEs	1.4713e-05	Significant after Bonferroni correction
6A_577020054	6A	577020054	Zinc EYTBW 2021 B2IR Rep 2	5.8373e-06	Significant after Bonferroni correction
6B_129478574	6B	129478574	Zinc EYTBW 2021 B2IR Rep 1	3.7411e-06	Significant after Bonferroni correction
6B_183278496	6B	183278496	Zinc EYTBW 2021 all environments BLUEs	4.8144e-06	Significant after Bonferroni correction
6B_188684286	6B	188684286	Zinc EYTBW 2021 all environments BLUEs	1.2468e-05	Significant after Bonferroni correction
6B_193334002	6B	193334002	Zinc EYTBW 2021 all environments BLUEs	3.5782e-06	Significant after Bonferroni correction
6B_204602976	6B	204602976	Zinc EYTBW 2021 all environments BLUEs	9.0486e-06	Significant after Bonferroni correction
6B_226747335	6B	226747335	Zinc EYTBW 2021 B2IR Rep 1	9.5088e-06	Significant after Bonferroni correction
6B_235778775	6B	235778775	Zinc EYTBW 2021 B2IR Rep 1	1.7588e-06	Significant after Bonferroni correction
6B_235778775	6B	235778775	Zinc EYTBW 2021 B2IR BLUEs	4.1553e-06	Significant after Bonferroni correction
6D_5945276	6D	5945276	Zinc EYTBW 2021 B2IR Rep 1	3.78e-07	Significant after Bonferroni correction
6D_470544313	6D	470544313	Iron PCZN 2021 SP Rep 1	2.0723e-05	Significant after Bonferroni correction
7A_9450917	7A	9450917	Zinc PCZN 2018 SP Rep 1	5.5893e-06	Significant after Bonferroni correction
7A_232523043	7A	232523043	Iron EYTBW 2021 B2IR BLUEs	9.336e-06	Significant after Bonferroni correction
7A_495927542	7A	495927542	Iron EYTBW 2021 B2IR BLUEs	5.8204e-06	Significant after Bonferroni correction
7A_596685453	7A	596685453	Iron EYTBW 2021 B2IR BLUEs	1.333e-05	Significant after Bonferroni correction
7A_600556352	7A	600556352	Iron EYTBW 2021 B2IR BLUEs	9.6114e-06	Significant after Bonferroni correction
7B_65592090	7B	65592090	Iron EYTBW 2021 B2IR Rep 1	1.4655e-05	Significant after Bonferroni correction
7B_115480504	7B	115480504	Zinc YTBW 2020 B5IR BLUEs	2.2729e-06	Significant after Bonferroni correction
7B_115480504	7B	115480504	Zinc YTBW 2020 B5IR Rep 1	1.0689e-05	Significant after Bonferroni correction
7B_196275863	7B	196275863	Iron EYTBW 2021 B2IR BLUEs	8.526e-06	Significant after Bonferroni correction
7B_393314447	7B	393314447	Zinc EYTBW 2021 B2IR BLUEs	6.1708e-06	Significant after Bonferroni correction
7B_516450006	7B	516450006	Zinc EYTBW 2021 B2IR BLUEs	5.1532e-06	Significant after Bonferroni correction
7B_520632340	7B	520632340	Zinc EYTBW 2021 B2IR BLUEs	2.84e-07	Significant after Bonferroni correction
7B_521279280	7B	521279280	Zinc EYTBW 2021 B2IR BLUEs	1.79e-07	Significant after Bonferroni correction
7B_521279280	7B	521279280	Zinc EYTBW 2021 B2IR Rep 1	1.2969e-05	Significant after Bonferroni correction
7B_523105384	7B	523105384	Zinc EYTBW 2021 B2IR BLUEs	1.133e-07	Significant after Bonferroni correction
7B_523105384	7B	523105384	Zinc EYTBW 2021 B2IR Rep 1	9.8011e-06	Significant after Bonferroni correction
7B_528946179	7B	528946179	Zinc EYTBW 2021 B2IR BLUEs	3.5115e-06	Significant after Bonferroni correction
7B_529147819	7B	529147819	Zinc EYTBW 2021 B2IR BLUEs	1.7491e-06	Significant after Bonferroni correction
7B_529832236	7B	529832236	Zinc EYTBW 2021 B2IR BLUEs	3.91e-07	Significant after Bonferroni correction
7B_529832236	7B	529832236	Zinc EYTBW 2021 all environments BLUEs	8.8119e-06	Significant after Bonferroni correction
7B_530459507	7B	530459507	Zinc EYTBW 2021 B2IR BLUEs	4.32e-07	Significant after Bonferroni correction
7B_530459507	7B	530459507	Zinc EYTBW 2021 all environments BLUEs	1.5766e-05	Significant after Bonferroni correction
7B_530585647	7B	530585647	Zinc EYTBW 2021 B2IR BLUEs	9.11e-08	Significant after Bonferroni correction
7B_530585647	7B	530585647	Zinc EYTBW 2021 all environments BLUEs	2.9981e-06	Significant after Bonferroni correction
7B_530585647	7B	530585647	Zinc EYTBW 2021 B2IR Rep 1	1.3221e-05	Significant after Bonferroni correction
7B_530585647	7B	530585647	Zinc EYTBW 2021 B2IR Rep 2	1.4862e-05	Significant after Bonferroni correction
7B_539879402	7B	539879402	Zinc EYTBW 2021 B2IR BLUEs	7.43e-08	Significant after Bonferroni correction
7B_539879402	7B	539879402	Zinc EYTBW 2021 B2IR Rep 2	1.3591e-05	Significant after Bonferroni correction
7B_539879737	7B	539879737	Zinc EYTBW 2021 B2IR BLUEs	4.48e-08	Significant after Bonferroni correction
7B_539879737	7B	539879737	Zinc EYTBW 2021 B2IR Rep 2	1.1203e-05	Significant after Bonferroni correction
7B_539879737	7B	539879737	Zinc EYTBW 2021 B2IR Rep 1	1.2397e-05	Significant after Bonferroni correction
7B_541485456	7B	541485456	Zinc EYTBW 2021 B2IR BLUEs	1.0476e-05	Significant after Bonferroni correction
7B_541697492	7B	541697492	Zinc EYTBW 2021 B2IR BLUEs	3.08e-08	Significant after Bonferroni correction
7B_541697492	7B	541697492	Zinc EYTBW 2021 B2IR Rep 2	5.8587e-06	Significant after Bonferroni correction
7B_541697492	7B	541697492	Zinc EYTBW 2021 B2IR Rep 1	1.1151e-05	Significant after Bonferroni correction
7B_544032561	7B	544032561	Zinc EYTBW 2021 B2IR BLUEs	5.97e-08	Significant after Bonferroni correction
7B_544032561	7B	544032561	Zinc EYTBW 2021 B2IR Rep 2	9.7925e-06	Significant after Bonferroni correction
7B_545991219	7B	545991219	Zinc EYTBW 2021 B2IR BLUEs	1.79e-08	Significant after Bonferroni correction
7B_545991219	7B	545991219	Zinc EYTBW 2021 B2IR Rep 1	5.8525e-06	Significant after Bonferroni correction
7B_545991219	7B	545991219	Zinc EYTBW 2021 B2IR Rep 2	6.4773e-06	Significant after Bonferroni correction
7B_546172988	7B	546172988	Zinc EYTBW 2021 B2IR BLUEs	6.1379e-06	Significant after Bonferroni correction
7B_547714243	7B	547714243	Zinc EYTBW 2021 B2IR BLUEs	6.3362e-06	Significant after Bonferroni correction
7B_549230804	7B	549230804	Zinc EYTBW 2021 B2IR BLUEs	2.012e-06	Significant after Bonferroni correction
7B_558326652	7B	558326652	Zinc EYTBW 2021 B2IR BLUEs	5.37e-07	Significant after Bonferroni correction
7B_558326652	7B	558326652	Zinc EYTBW 2021 B2IR Rep 2	1.5433e-05	Significant after Bonferroni correction
7B_560802461	7B	560802461	Zinc EYTBW 2021 B2IR BLUEs	5.6783e-06	Significant after Bonferroni correction
7B_562159307	7B	562159307	Zinc EYTBW 2021 B2IR BLUEs	1.1377e-05	Significant after Bonferroni correction
7B_562835425	7B	562835425	Zinc EYTBW 2021 B2IR BLUEs	1.4449e-05	Significant after Bonferroni correction
7B_565054902	7B	565054902	Zinc EYTBW 2021 B2IR BLUEs	1.2471e-05	Significant after Bonferroni correction
7B_568668310	7B	568668310	Zinc EYTBW 2021 B2IR BLUEs	7.4369e-06	Significant after Bonferroni correction
7B_572421910	7B	572421910	Zinc EYTBW 2021 B2IR BLUEs	5.9072e-06	Significant after Bonferroni correction
1A_3943497	1A	3943497	Iron YTZN 2020 B5IR Rep 2	0.0008868	Not significant after Bonferroni correction
1A_4159194	1A	4159194	Zinc YTBW 2020 B5IR BLUEs	0.0002468	Not significant after Bonferroni correction
1A_4159194	1A	4159194	Zinc YTBW 2020 B5IR Rep 1	0.00065392	Not significant after Bonferroni correction
1A_4159194	1A	4159194	Zinc YTBW 2020 B5IR Rep 2	0.00086811	Not significant after Bonferroni correction
1A_9940159	1A	9940159	Iron EYTBW 2021 SP Rep 1	0.00041345	Not significant after Bonferroni correction
1A_10423260	1A	10423260	Zinc YTBW 2021 B5IR Rep 1	0.00075492	Not significant after Bonferroni correction
1A_12113521	1A	12113521	Iron EYTBW 2021 SP Rep 1	0.00082277	Not significant after Bonferroni correction
1A_12115889	1A	12115889	Iron EYTBW 2021 SP Rep 1	0.00050607	Not significant after Bonferroni correction
1A_12142757	1A	12142757	Iron YTBW 2020 B5IR BLUEs	0.00030035	Not significant after Bonferroni correction
1A_12142757	1A	12142757	Iron YTBW 2020 B5IR Rep 2	0.00088675	Not significant after Bonferroni correction
1A_14050313	1A	14050313	Iron EYTBW 2021 SP Rep 1	0.00077302	Not significant after Bonferroni correction
1A_15345707	1A	15345707	Iron EYTBW 2021 SP Rep 1	0.00089361	Not significant after Bonferroni correction
1A_15525079	1A	15525079	Iron EYTBW 2021 B2IR Rep 2	0.00030699	Not significant after Bonferroni correction
1A_22059287	1A	22059287	Zinc EYTBW 2021 SP Rep 2	0.00069613	Not significant after Bonferroni correction
1A_26318712	1A	26318712	Zinc YTBW 2020 B5IR Rep 1	0.0004255	Not significant after Bonferroni correction
1A_38715697	1A	38715697	Zinc EYTZN 2021 B5IR BLUEs	0.0003881	Not significant after Bonferroni correction
1A_38715697	1A	38715697	Zinc EYTZN 2021 B5IR Rep 1	0.00099706	Not significant after Bonferroni correction
1A_89590707	1A	89590707	Zinc YTBW 2020 B5IR BLUEs	0.00013443	Not significant after Bonferroni correction
1A_89590707	1A	89590707	Zinc YTBW 2020 B5IR Rep 2	0.00019409	Not significant after Bonferroni correction
1A_89590707	1A	89590707	Zinc YTBW 2020 B5IR Rep 1	0.00065998	Not significant after Bonferroni correction
1A_463431306	1A	463431306	Iron YTZN 2019 B5IR Rep 2	0.00037433	Not significant after Bonferroni correction
1A_489286099	1A	489286099	Iron EYTZN 2021 B5IR Rep 2	0.00070092	Not significant after Bonferroni correction
1A_489286099	1A	489286099	Iron EYTZN 2021 B5IR BLUEs	0.00081309	Not significant after Bonferroni correction
1A_490469677	1A	490469677	Iron EYTBW 2021 all environments BLUEs	0.00024134	Not significant after Bonferroni correction
1A_531885906	1A	531885906	Iron EYTBW 2021 B5IR Rep 2	0.00040667	Not significant after Bonferroni correction
1A_532644655	1A	532644655	Zinc EYTBW 2021 B2IR Rep 1	0.00043957	Not significant after Bonferroni correction
1A_532814490	1A	532814490	Iron YTBW 2020 B5IR Rep 2	0.00080862	Not significant after Bonferroni correction
1A_536664231	1A	536664231	Zinc EYTBW 2021 B5IR Rep 1	0.00044543	Not significant after Bonferroni correction
1A_536664231	1A	536664231	Iron EYTBW 2021 B2IR BLUEs	0.00083738	Not significant after Bonferroni correction
1A_536664231	1A	536664231	Iron YTBW 2020 B5IR Rep 1	0.00095808	Not significant after Bonferroni correction
1A_543171561	1A	543171561	Iron YTBW 2020 B5IR Rep 1	0.00080447	Not significant after Bonferroni correction
1A_545762254	1A	545762254	Iron YTBW 2020 B5IR Rep 1	0.00055729	Not significant after Bonferroni correction
1A_549511417	1A	549511417	Iron EYTBW 2021 B5IR Rep 2	0.00045002	Not significant after Bonferroni correction
1A_549707035	1A	549707035	Iron YTBW 2020 B5IR Rep 1	0.00040384	Not significant after Bonferroni correction
1A_551170221	1A	551170221	Iron EYTBW 2021 all environments BLUEs	0.00085411	Not significant after Bonferroni correction
1A_551170221	1A	551170221	Iron YTBW 2020 B5IR Rep 1	0.00091521	Not significant after Bonferroni correction
1A_551428126	1A	551428126	Iron EYTBW 2021 B5IR Rep 1	6.1761e-05	Not significant after Bonferroni correction
1A_551428126	1A	551428126	Iron EYTBW 2021 B5IR BLUEs	0.00011199	Not significant after Bonferroni correction
1A_551428126	1A	551428126	Iron EYTBW 2021 all environments BLUEs	0.00016025	Not significant after Bonferroni correction
1A_552280058	1A	552280058	Iron YTBW 2020 B5IR BLUEs	0.00046218	Not significant after Bonferroni correction
1A_552281805	1A	552281805	Iron EYTBW 2021 all environments BLUEs	0.00059833	Not significant after Bonferroni correction
1A_556829267	1A	556829267	Zinc EYTBW 2021 SP Rep 2	8.4517e-05	Not significant after Bonferroni correction
1A_556846508	1A	556846508	Zinc EYTBW 2021 SP Rep 2	0.00063465	Not significant after Bonferroni correction
1A_557108968	1A	557108968	Zinc EYTBW 2021 SP Rep 2	0.00083191	Not significant after Bonferroni correction
1A_557295620	1A	557295620	Iron YTBW 2020 B5IR Rep 1	0.00096442	Not significant after Bonferroni correction
1A_557295935	1A	557295935	Iron EYTBW 2021 all environments BLUEs	2.7117e-05	Not significant after Bonferroni correction
1A_557295935	1A	557295935	Iron EYTBW 2021 B5IR BLUEs	0.00082509	Not significant after Bonferroni correction
1A_557314695	1A	557314695	Iron YTBW 2020 B5IR Rep 1	4.6519e-05	Not significant after Bonferroni correction
1A_557314695	1A	557314695	Iron YTBW 2020 B5IR BLUEs	0.00020473	Not significant after Bonferroni correction
1A_557314695	1A	557314695	Iron EYTBW 2021 all environments BLUEs	0.00042022	Not significant after Bonferroni correction
1A_558316677	1A	558316677	Iron YTZN 2021 B5IR Rep 1	0.00096473	Not significant after Bonferroni correction
1A_558464613	1A	558464613	Iron YTBW 2020 B5IR Rep 1	0.00030075	Not significant after Bonferroni correction
1A_558541135	1A	558541135	Iron YTBW 2020 B5IR Rep 1	0.00034331	Not significant after Bonferroni correction
1A_558541135	1A	558541135	Iron EYTBW 2021 B5IR BLUEs	0.00035348	Not significant after Bonferroni correction
1A_558541135	1A	558541135	Iron combined panel B5IR % check	0.00074867	Not significant after Bonferroni correction
1A_558591438	1A	558591438	Iron EYTBW 2021 all environments BLUEs	0.00019674	Not significant after Bonferroni correction
1A_558598761	1A	558598761	Iron YTBW 2020 B5IR Rep 1	0.00083587	Not significant after Bonferroni correction
1A_565187582	1A	565187582	Iron YTBW 2020 B5IR Rep 1	0.0005396	Not significant after Bonferroni correction
1A_565614284	1A	565614284	Iron YTBW 2020 B5IR Rep 1	0.00015654	Not significant after Bonferroni correction
1A_568003154	1A	568003154	Iron YTBW 2020 B5IR Rep 1	0.00038908	Not significant after Bonferroni correction
1A_568003154	1A	568003154	Iron YTBW 2020 B5IR BLUEs	0.00079538	Not significant after Bonferroni correction
1A_568032856	1A	568032856	Iron YTBW 2020 B5IR Rep 1	9.5597e-05	Not significant after Bonferroni correction
1A_568032856	1A	568032856	Iron YTBW 2020 B5IR BLUEs	0.00087043	Not significant after Bonferroni correction
1A_570615890	1A	570615890	Iron YTBW 2020 B5IR Rep 1	0.00038337	Not significant after Bonferroni correction
1A_570615890	1A	570615890	Zinc EYTBW 2021 B5IR Rep 2	0.00040719	Not significant after Bonferroni correction
1A_570615890	1A	570615890	Iron EYTBW 2021 all environments BLUEs	0.00084422	Not significant after Bonferroni correction
1A_570615890	1A	570615890	Iron YTBW 2020 B5IR BLUEs	0.00088379	Not significant after Bonferroni correction
1A_570620150	1A	570620150	Iron EYTBW 2021 all environments BLUEs	0.00018645	Not significant after Bonferroni correction
1A_570620150	1A	570620150	Iron EYTBW 2021 B5IR BLUEs	0.00045465	Not significant after Bonferroni correction
1A_572747081	1A	572747081	Iron EYTBW 2021 SP BLUEs	0.00032252	Not significant after Bonferroni correction
1A_572747081	1A	572747081	Iron YTBW 2020 B5IR Rep 1	0.00064474	Not significant after Bonferroni correction
1A_573393087	1A	573393087	Iron EYTBW 2021 all environments BLUEs	0.00034118	Not significant after Bonferroni correction
1A_585652280	1A	585652280	Iron EYTBW 2021 B2IR Rep 1	0.00012244	Not significant after Bonferroni correction
1A_585656558	1A	585656558	Zinc YTZN 2021 B5IR Rep 2	0.00039801	Not significant after Bonferroni correction
1A_586603730	1A	586603730	Iron EYTBW 2021 B5IR BLUEs	0.00055752	Not significant after Bonferroni correction
1A_586603730	1A	586603730	Iron EYTBW 2021 B5IR Rep 2	0.00086874	Not significant after Bonferroni correction
1A_588098228	1A	588098228	Iron YTZN 2020 B5IR Rep 2	0.00081565	Not significant after Bonferroni correction
1A_589510618	1A	589510618	Zinc YTBW 2021 B5IR BLUEs	0.00028741	Not significant after Bonferroni correction
1A_589510618	1A	589510618	Zinc YTBW 2021 B5IR Rep 2	0.00037327	Not significant after Bonferroni correction
1A_592325581	1A	592325581	Iron EYTBW 2021 all environments BLUEs	0.00047122	Not significant after Bonferroni correction
1B_1533898	1B	1533898	Zinc EYTBW 2021 SP Rep 2	0.00048111	Not significant after Bonferroni correction
1B_6756178	1B	6756178	Zinc YTBW 2020 B5IR Rep 2	0.00044598	Not significant after Bonferroni correction
1B_45375569	1B	45375569	Zinc EYTBW 2021 B2IR BLUEs	0.00031174	Not significant after Bonferroni correction
1B_45375569	1B	45375569	Zinc EYTBW 2021 all environments BLUEs	0.00080993	Not significant after Bonferroni correction
1B_46660489	1B	46660489	Iron EYTBW 2021 B2IR BLUEs	0.00091129	Not significant after Bonferroni correction
1B_51017202	1B	51017202	Iron EYTBW 2021 B2IR Rep 1	0.0009758	Not significant after Bonferroni correction
1B_176291120	1B	176291120	Zinc YTBW 2021 B5IR Rep 2	0.00084114	Not significant after Bonferroni correction
1B_253471642	1B	253471642	Iron EYTBW 2021 SP Rep 1	0.00022859	Not significant after Bonferroni correction
1B_253471642	1B	253471642	Iron EYTBW 2021 SP BLUEs	0.00052353	Not significant after Bonferroni correction
1B_327840276	1B	327840276	Iron EYTBW 2021 B2IR BLUEs	0.00092558	Not significant after Bonferroni correction
1B_329376610	1B	329376610	Iron EYTBW 2021 B5IR Rep 2	0.00080218	Not significant after Bonferroni correction
1B_381650384	1B	381650384	Iron YTBW 2020 B5IR Rep 1	0.00047751	Not significant after Bonferroni correction
1B_402113039	1B	402113039	Zinc EYTBW 2021 SP Rep 2	0.00063126	Not significant after Bonferroni correction
1B_448740348	1B	448740348	Zinc EYTBW 2021 B2IR Rep 2	0.00030793	Not significant after Bonferroni correction
1B_461300962	1B	461300962	Zinc EYTZN 2021 B5IR Rep 2	0.00076067	Not significant after Bonferroni correction
1B_518877213	1B	518877213	Zinc YTBW 2020 B5IR Rep 1	0.00096724	Not significant after Bonferroni correction
1B_529854670	1B	529854670	Iron EYTZN 2021 B5IR Rep 1	0.00089737	Not significant after Bonferroni correction
1B_532711549	1B	532711549	Iron EYTBW 2021 B2IR Rep 1	0.00075374	Not significant after Bonferroni correction
1B_550288164	1B	550288164	Zinc EYTBW 2021 SP Rep 2	0.00032327	Not significant after Bonferroni correction
1B_564653560	1B	564653560	Iron YTZN 2020 B5IR Rep 3	0.00070658	Not significant after Bonferroni correction
1B_564717970	1B	564717970	Iron YTZN 2020 B5IR Rep 3	0.00066033	Not significant after Bonferroni correction
1B_575712674	1B	575712674	Iron EYTBW 2021 all environments BLUEs	0.00067278	Not significant after Bonferroni correction
1B_577037097	1B	577037097	Iron EYTBW 2021 SP Rep 2	0.00018608	Not significant after Bonferroni correction
1B_582905056	1B	582905056	Iron EYTBW 2021 all environments BLUEs	0.00076188	Not significant after Bonferroni correction
1B_587024581	1B	587024581	Iron YTBW 2021 B5IR Rep 2	0.00033412	Not significant after Bonferroni correction
1B_587138373	1B	587138373	Iron EYTBW 2021 SP BLUEs	0.00062068	Not significant after Bonferroni correction
1B_587501379	1B	587501379	Iron YTBW 2021 B5IR Rep 2	0.0003348	Not significant after Bonferroni correction
1B_593176868	1B	593176868	Zinc EYTBW 2021 B2IR Rep 1	0.00010559	Not significant after Bonferroni correction
1B_593566439	1B	593566439	Zinc EYTBW 2021 B2IR Rep 1	0.00014745	Not significant after Bonferroni correction
1B_593566439	1B	593566439	Zinc EYTBW 2021 B2IR BLUEs	0.00095163	Not significant after Bonferroni correction
1B_593910579	1B	593910579	Zinc EYTBW 2021 B2IR Rep 1	0.00014495	Not significant after Bonferroni correction
1B_593916951	1B	593916951	Zinc EYTBW 2021 B2IR Rep 1	0.00040977	Not significant after Bonferroni correction
1B_594654831	1B	594654831	Zinc EYTBW 2021 B2IR Rep 1	0.00060889	Not significant after Bonferroni correction
1B_595163852	1B	595163852	Zinc EYTBW 2021 B2IR Rep 1	0.00015948	Not significant after Bonferroni correction
1B_595177521	1B	595177521	Zinc EYTBW 2021 B2IR Rep 1	0.00084068	Not significant after Bonferroni correction
1B_595471200	1B	595471200	Zinc EYTBW 2021 B2IR Rep 1	0.00037338	Not significant after Bonferroni correction
1B_596895036	1B	596895036	Zinc EYTBW 2021 B2IR Rep 1	0.00012255	Not significant after Bonferroni correction
1B_624322383	1B	624322383	Iron EYTBW 2021 all environments BLUEs	0.00010804	Not significant after Bonferroni correction
1B_624322383	1B	624322383	Iron EYTBW 2021 B2IR BLUEs	0.0006177	Not significant after Bonferroni correction
1B_624651182	1B	624651182	Iron EYTBW 2021 all environments BLUEs	0.00017007	Not significant after Bonferroni correction
1B_624651182	1B	624651182	Iron EYTBW 2021 B2IR BLUEs	0.00031337	Not significant after Bonferroni correction
1B_625077030	1B	625077030	Iron EYTBW 2021 B2IR BLUEs	5.1608e-05	Not significant after Bonferroni correction
1B_625077030	1B	625077030	Iron EYTBW 2021 all environments BLUEs	8.5541e-05	Not significant after Bonferroni correction
1B_625077030	1B	625077030	Iron EYTBW 2021 B2IR Rep 2	0.000471	Not significant after Bonferroni correction
1B_625232015	1B	625232015	Iron EYTBW 2021 all environments BLUEs	1.9685e-05	Not significant after Bonferroni correction
1B_625232015	1B	625232015	Iron EYTBW 2021 B2IR Rep 2	0.00046986	Not significant after Bonferroni correction
1B_626069867	1B	626069867	Iron EYTBW 2021 B2IR BLUEs	0.00013277	Not significant after Bonferroni correction
1B_626069867	1B	626069867	Iron EYTBW 2021 all environments BLUEs	0.0001988	Not significant after Bonferroni correction
1B_626228962	1B	626228962	Iron YTZN 2019 B5IR Rep 2	0.00063952	Not significant after Bonferroni correction
1B_626761331	1B	626761331	Iron EYTBW 2021 all environments BLUEs	0.00029757	Not significant after Bonferroni correction
1B_626761331	1B	626761331	Iron EYTBW 2021 B2IR BLUEs	0.00046212	Not significant after Bonferroni correction
1B_626761370	1B	626761370	Iron EYTBW 2021 all environments BLUEs	8.5586e-05	Not significant after Bonferroni correction
1B_626761370	1B	626761370	Iron EYTBW 2021 B2IR BLUEs	0.00014337	Not significant after Bonferroni correction
1B_627920559	1B	627920559	Iron EYTBW 2021 all environments BLUEs	6.833e-05	Not significant after Bonferroni correction
1B_627920559	1B	627920559	Iron EYTBW 2021 B2IR BLUEs	0.00076218	Not significant after Bonferroni correction
1B_628983900	1B	628983900	Iron EYTBW 2021 all environments BLUEs	3.9868e-05	Not significant after Bonferroni correction
1B_628983900	1B	628983900	Iron EYTBW 2021 B2IR BLUEs	0.00016073	Not significant after Bonferroni correction
1B_629304240	1B	629304240	Iron EYTBW 2021 all environments BLUEs	0.00041217	Not significant after Bonferroni correction
1B_629322659	1B	629322659	Zinc EYTBW 2021 B2IR Rep 1	0.00026726	Not significant after Bonferroni correction
1B_629322659	1B	629322659	Iron EYTBW 2021 B2IR Rep 1	0.0007953	Not significant after Bonferroni correction
1B_629470985	1B	629470985	Iron EYTBW 2021 B2IR BLUEs	0.00069562	Not significant after Bonferroni correction
1B_629489631	1B	629489631	Iron EYTBW 2021 all environments BLUEs	0.0008268	Not significant after Bonferroni correction
1B_629489631	1B	629489631	Iron EYTBW 2021 B2IR BLUEs	0.00084769	Not significant after Bonferroni correction
1B_629644189	1B	629644189	Iron EYTBW 2021 B2IR BLUEs	0.00022284	Not significant after Bonferroni correction
1B_629644189	1B	629644189	Iron EYTBW 2021 all environments BLUEs	0.00077708	Not significant after Bonferroni correction
1B_630501665	1B	630501665	Zinc EYTBW 2021 B2IR Rep 1	0.00048169	Not significant after Bonferroni correction
1B_631257174	1B	631257174	Iron EYTBW 2021 all environments BLUEs	0.00023947	Not significant after Bonferroni correction
1B_631665988	1B	631665988	Iron EYTBW 2021 B2IR Rep 1	4.561e-05	Not significant after Bonferroni correction
1B_632652455	1B	632652455	Iron EYTBW 2021 all environments BLUEs	0.00010741	Not significant after Bonferroni correction
1B_632652455	1B	632652455	Iron EYTBW 2021 B2IR BLUEs	0.00086757	Not significant after Bonferroni correction
1B_633291592	1B	633291592	Zinc EYTZN 2021 B5IR Rep 1	0.00086246	Not significant after Bonferroni correction
1B_633982710	1B	633982710	Zinc YTBW 2020 B5IR BLUEs	0.00024582	Not significant after Bonferroni correction
1B_633982710	1B	633982710	Zinc YTBW 2020 B5IR Rep 1	0.00062185	Not significant after Bonferroni correction
1B_634242993	1B	634242993	Zinc EYTZN 2021 B5IR BLUEs	7.5946e-05	Not significant after Bonferroni correction
1B_634242993	1B	634242993	Zinc YTBW 2020 B5IR BLUEs	0.00084682	Not significant after Bonferroni correction
1B_635437386	1B	635437386	Iron EYTBW 2021 all environments BLUEs	9.7021e-05	Not significant after Bonferroni correction
1B_635437386	1B	635437386	Iron EYTBW 2021 B2IR BLUEs	0.00010275	Not significant after Bonferroni correction
1B_635977848	1B	635977848	Iron EYTBW 2021 B2IR Rep 1	0.00015186	Not significant after Bonferroni correction
1B_635977848	1B	635977848	Zinc YTZN 2021 B5IR BLUEs	0.00039011	Not significant after Bonferroni correction
1B_635977848	1B	635977848	Zinc YTZN 2021 B5IR Rep 2	0.0004429	Not significant after Bonferroni correction
1B_636098920	1B	636098920	Zinc YTBW 2020 B5IR BLUEs	0.00013131	Not significant after Bonferroni correction
1B_636098920	1B	636098920	Zinc YTBW 2020 B5IR Rep 1	0.00054825	Not significant after Bonferroni correction
1B_636796017	1B	636796017	Iron EYTBW 2021 B2IR BLUEs	0.00010853	Not significant after Bonferroni correction
1B_636840957	1B	636840957	Iron EYTBW 2021 B5IR Rep 1	6.9787e-05	Not significant after Bonferroni correction
1B_636840957	1B	636840957	Iron EYTBW 2021 all environments BLUEs	0.00020584	Not significant after Bonferroni correction
1B_636840957	1B	636840957	Iron EYTBW 2021 B5IR BLUEs	0.00099924	Not significant after Bonferroni correction
1B_637901362	1B	637901362	Iron EYTBW 2021 all environments BLUEs	2.1269e-05	Not significant after Bonferroni correction
1B_637901362	1B	637901362	Iron EYTBW 2021 B2IR BLUEs	3.0977e-05	Not significant after Bonferroni correction
1B_637901362	1B	637901362	Iron EYTBW 2021 B2IR Rep 2	0.00032961	Not significant after Bonferroni correction
1B_637938406	1B	637938406	Iron EYTBW 2021 B2IR Rep 2	0.00082689	Not significant after Bonferroni correction
1B_638012348	1B	638012348	Iron EYTBW 2021 B2IR Rep 2	0.00036903	Not significant after Bonferroni correction
1B_638012348	1B	638012348	Iron EYTBW 2021 B2IR BLUEs	0.00066971	Not significant after Bonferroni correction
1B_638888458	1B	638888458	Iron EYTBW 2021 B2IR BLUEs	0.00061227	Not significant after Bonferroni correction
1B_638944475	1B	638944475	Iron EYTBW 2021 all environments BLUEs	6.5245e-05	Not significant after Bonferroni correction
1B_638944475	1B	638944475	Iron EYTBW 2021 B2IR BLUEs	0.00014967	Not significant after Bonferroni correction
1B_638944475	1B	638944475	Iron EYTBW 2021 B2IR Rep 2	0.00021791	Not significant after Bonferroni correction
1B_638944475	1B	638944475	Iron EYTBW 2021 B5IR BLUEs	0.00087747	Not significant after Bonferroni correction
1B_638944475	1B	638944475	Iron YTBW 2021 B5IR Rep 2	0.00093518	Not significant after Bonferroni correction
1B_639042225	1B	639042225	Iron EYTBW 2021 all environments BLUEs	0.00024411	Not significant after Bonferroni correction
1B_639042225	1B	639042225	Iron EYTBW 2021 B2IR BLUEs	0.00028525	Not significant after Bonferroni correction
1B_641131482	1B	641131482	Iron EYTBW 2021 B2IR BLUEs	0.00011333	Not significant after Bonferroni correction
1B_641131482	1B	641131482	Iron EYTBW 2021 B2IR Rep 2	0.00037473	Not significant after Bonferroni correction
1B_641131482	1B	641131482	Iron EYTBW 2021 all environments BLUEs	0.00085465	Not significant after Bonferroni correction
1B_641200228	1B	641200228	Iron EYTBW 2021 B2IR BLUEs	0.00020994	Not significant after Bonferroni correction
1B_641218839	1B	641218839	Zinc EYTBW 2021 all environments BLUEs	5.0193e-05	Not significant after Bonferroni correction
1B_641218839	1B	641218839	Zinc EYTBW 2021 B5IR Rep 1	0.0001345	Not significant after Bonferroni correction
1B_641218839	1B	641218839	Zinc EYTBW 2021 B5IR BLUEs	0.00047525	Not significant after Bonferroni correction
1B_641218839	1B	641218839	Iron EYTBW 2021 all environments BLUEs	0.00054356	Not significant after Bonferroni correction
1B_645139699	1B	645139699	Iron EYTBW 2021 B2IR Rep 2	0.00080402	Not significant after Bonferroni correction
1B_655839852	1B	655839852	Zinc EYTBW 2021 B2IR Rep 2	0.00038994	Not significant after Bonferroni correction
1B_655908290	1B	655908290	Zinc EYTBW 2021 B2IR Rep 2	0.00076998	Not significant after Bonferroni correction
1B_655908290	1B	655908290	Zinc EYTBW 2021 B2IR BLUEs	0.00080714	Not significant after Bonferroni correction
1B_656083100	1B	656083100	Zinc EYTBW 2021 B2IR Rep 2	0.00061099	Not significant after Bonferroni correction
1B_656450103	1B	656450103	Zinc EYTBW 2021 B2IR Rep 2	0.00044939	Not significant after Bonferroni correction
1B_656507627	1B	656507627	Iron YTBW 2020 B5IR Rep 1	0.00067727	Not significant after Bonferroni correction
1B_656507627	1B	656507627	Zinc EYTBW 2021 B2IR Rep 2	0.00068267	Not significant after Bonferroni correction
1B_656666455	1B	656666455	Zinc EYTZN 2020 B5IR Rep 1	0.00050977	Not significant after Bonferroni correction
1B_659759447	1B	659759447	Iron YTBW 2020 B5IR BLUEs	0.00029729	Not significant after Bonferroni correction
1B_659759447	1B	659759447	Iron YTBW 2020 B5IR Rep 1	0.00063638	Not significant after Bonferroni correction
1B_660463502	1B	660463502	Iron YTBW 2020 B5IR BLUEs	8.2853e-05	Not significant after Bonferroni correction
1B_660463502	1B	660463502	Iron YTBW 2020 B5IR Rep 1	9.7432e-05	Not significant after Bonferroni correction
1B_665793223	1B	665793223	Iron YTBW 2020 B5IR Rep 1	0.00057007	Not significant after Bonferroni correction
1B_665793223	1B	665793223	Iron YTBW 2020 B5IR BLUEs	0.00069973	Not significant after Bonferroni correction
1B_666035472	1B	666035472	Iron EYTBW 2021 SP Rep 1	0.00097909	Not significant after Bonferroni correction
1B_666942337	1B	666942337	Zinc YTBW 2021 B5IR Rep 1	0.00070775	Not significant after Bonferroni correction
1B_673948840	1B	673948840	Iron EYTBW 2021 B5IR BLUEs	0.00070888	Not significant after Bonferroni correction
1D_78777	1D	78777	Iron EYTBW 2021 B5IR Rep 1	5.2615e-05	Not significant after Bonferroni correction
1D_2430803	1D	2430803	Iron EYTBW 2021 SP Rep 2	6.3809e-05	Not significant after Bonferroni correction
1D_2430803	1D	2430803	Iron EYTBW 2021 all environments BLUEs	6.6842e-05	Not significant after Bonferroni correction
1D_2430803	1D	2430803	Iron EYTBW 2021 SP BLUEs	0.00018558	Not significant after Bonferroni correction
1D_2430803	1D	2430803	Iron EYTBW 2021 B5IR Rep 1	0.0004627	Not significant after Bonferroni correction
1D_2510391	1D	2510391	Iron EYTBW 2021 B5IR BLUEs	5.8356e-05	Not significant after Bonferroni correction
1D_2510391	1D	2510391	Iron EYTBW 2021 B5IR Rep 1	6.5654e-05	Not significant after Bonferroni correction
1D_2510391	1D	2510391	Iron EYTBW 2021 all environments BLUEs	0.00015121	Not significant after Bonferroni correction
1D_2510391	1D	2510391	Zinc EYTBW 2021 all environments BLUEs	0.00023025	Not significant after Bonferroni correction
1D_2510391	1D	2510391	Zinc EYTBW 2021 B5IR BLUEs	0.00034285	Not significant after Bonferroni correction
1D_2510391	1D	2510391	Zinc EYTBW 2021 B5IR Rep 1	0.00053626	Not significant after Bonferroni correction
1D_2531230	1D	2531230	Iron EYTBW 2021 B5IR BLUEs	0.00034444	Not significant after Bonferroni correction
1D_2531230	1D	2531230	Iron EYTBW 2021 all environments BLUEs	0.00042767	Not significant after Bonferroni correction
1D_2531230	1D	2531230	Zinc EYTBW 2021 B5IR BLUEs	0.00061346	Not significant after Bonferroni correction
1D_2531230	1D	2531230	Iron EYTBW 2021 B5IR Rep 1	0.00073497	Not significant after Bonferroni correction
1D_2531230	1D	2531230	Zinc EYTBW 2021 all environments BLUEs	0.000934	Not significant after Bonferroni correction
1D_2691857	1D	2691857	Iron EYTBW 2021 B5IR BLUEs	0.00087143	Not significant after Bonferroni correction
1D_2948257	1D	2948257	Iron EYTBW 2021 B5IR Rep 1	0.00087572	Not significant after Bonferroni correction
1D_2948257	1D	2948257	Iron EYTBW 2021 B5IR BLUEs	0.00099632	Not significant after Bonferroni correction
1D_3232634	1D	3232634	Zinc PCZN 2021 SP Rep 1	0.00095366	Not significant after Bonferroni correction
1D_3519948	1D	3519948	Zinc PCZN 2021 SP Rep 1	0.00099384	Not significant after Bonferroni correction
1D_3756690	1D	3756690	Iron EYTBW 2021 B2IR Rep 1	0.00029563	Not significant after Bonferroni correction
1D_5009429	1D	5009429	Zinc EYTBW 2021 B5IR Rep 1	0.00029882	Not significant after Bonferroni correction
1D_5131731	1D	5131731	Zinc PCZN 2021 SP Rep 1	0.00084188	Not significant after Bonferroni correction
1D_8237892	1D	8237892	Zinc EYTBW 2021 B2IR Rep 1	0.00011898	Not significant after Bonferroni correction
1D_11646338	1D	11646338	Zinc EYTBW 2021 B2IR Rep 1	0.00054846	Not significant after Bonferroni correction
1D_11849919	1D	11849919	Zinc EYTBW 2021 B2IR Rep 1	0.00028521	Not significant after Bonferroni correction
1D_16138055	1D	16138055	Zinc EYTBW 2021 B2IR BLUEs	0.00067147	Not significant after Bonferroni correction
1D_25121971	1D	25121971	Iron EYTBW 2021 SP Rep 1	0.00079395	Not significant after Bonferroni correction
1D_32974495	1D	32974495	Zinc EYTBW 2021 B2IR BLUEs	0.00075846	Not significant after Bonferroni correction
1D_32974495	1D	32974495	Zinc EYTBW 2021 B2IR Rep 1	0.00081564	Not significant after Bonferroni correction
1D_57506439	1D	57506439	Zinc PCZN 2018 SP Rep 1	0.0002569	Not significant after Bonferroni correction
1D_193726555	1D	193726555	Zinc EYTBW 2021 B2IR BLUEs	0.00029492	Not significant after Bonferroni correction
1D_193726555	1D	193726555	Zinc EYTBW 2021 B2IR Rep 1	0.00083036	Not significant after Bonferroni correction
1D_196096385	1D	196096385	Zinc PCZN 2021 SP Rep 1	0.00027356	Not significant after Bonferroni correction
1D_328325674	1D	328325674	Zinc YTZN 2020 B5IR Rep 2	0.00040539	Not significant after Bonferroni correction
1D_363251633	1D	363251633	Iron EYTBW 2021 SP Rep 1	0.00033388	Not significant after Bonferroni correction
1D_370742369	1D	370742369	Zinc YTZN 2020 B5IR Rep 1	0.00047234	Not significant after Bonferroni correction
1D_370742369	1D	370742369	Zinc YTZN 2020 B5IR BLUEs	0.00069545	Not significant after Bonferroni correction
1D_397623804	1D	397623804	Iron YTBW 2021 B5IR Rep 2	0.00087102	Not significant after Bonferroni correction
1D_412169869	1D	412169869	Zinc YTBW 2020 B5IR BLUEs	0.00032702	Not significant after Bonferroni correction
1D_412169869	1D	412169869	Zinc YTBW 2020 B5IR Rep 2	0.00049403	Not significant after Bonferroni correction
1D_418517994	1D	418517994	Zinc YTBW 2020 B5IR BLUEs	0.00049866	Not significant after Bonferroni correction
1D_427868715	1D	427868715	Zinc YTBW 2020 B5IR BLUEs	0.00025546	Not significant after Bonferroni correction
1D_433254100	1D	433254100	Zinc YTBW 2020 B5IR BLUEs	0.00066874	Not significant after Bonferroni correction
1D_435259003	1D	435259003	Iron EYTBW 2021 B2IR Rep 1	0.0001579	Not significant after Bonferroni correction
1D_435465609	1D	435465609	Iron EYTBW 2021 B2IR Rep 1	0.00073724	Not significant after Bonferroni correction
1D_463950244	1D	463950244	Iron YTBW 2021 B5IR Rep 1	0.00025069	Not significant after Bonferroni correction
1D_493978993	1D	493978993	Iron PCZN 2021 SP Rep 1	0.00044393	Not significant after Bonferroni correction
2A_32886829	2A	32886829	Zinc EYTBW 2021 B2IR Rep 2	0.00028679	Not significant after Bonferroni correction
2A_65950702	2A	65950702	Zinc YTBW 2021 B5IR Rep 1	0.00038211	Not significant after Bonferroni correction
2A_67081371	2A	67081371	Iron EYTBW 2021 SP Rep 1	0.00037458	Not significant after Bonferroni correction
2A_159882069	2A	159882069	Iron EYTBW 2021 B5IR Rep 1	0.00086136	Not significant after Bonferroni correction
2A_187042623	2A	187042623	Zinc EYTBW 2021 B5IR BLUEs	0.00076001	Not significant after Bonferroni correction
2A_194178609	2A	194178609	Zinc EYTBW 2021 B2IR Rep 1	0.00066342	Not significant after Bonferroni correction
2A_219345295	2A	219345295	Iron EYTBW 2021 B5IR Rep 1	0.00060789	Not significant after Bonferroni correction
2A_287459828	2A	287459828	Iron EYTBW 2021 B2IR BLUEs	0.0004958	Not significant after Bonferroni correction
2A_428372781	2A	428372781	Zinc EYTZN 2021 B5IR Rep 1	0.00023874	Not significant after Bonferroni correction
2A_428372781	2A	428372781	Zinc EYTZN 2021 B5IR BLUEs	0.00042648	Not significant after Bonferroni correction
2A_428372781	2A	428372781	Zinc YTZN 2020 B5IR BLUEs	0.00042925	Not significant after Bonferroni correction
2A_428372781	2A	428372781	Zinc EYTBW 2021 B2IR Rep 1	0.00061121	Not significant after Bonferroni correction
2A_429809228	2A	429809228	Iron EYTBW 2021 B5IR Rep 1	0.00023902	Not significant after Bonferroni correction
2A_478911698	2A	478911698	Iron YTZN 2019 B5IR Rep 1	0.00045675	Not significant after Bonferroni correction
2A_557198729	2A	557198729	Iron EYTBW 2021 B5IR Rep 2	0.00034705	Not significant after Bonferroni correction
2A_557967841	2A	557967841	Iron EYTBW 2021 B5IR Rep 2	0.00061151	Not significant after Bonferroni correction
2A_559828485	2A	559828485	Iron EYTBW 2021 B5IR Rep 2	0.0008477	Not significant after Bonferroni correction
2A_610117465	2A	610117465	Zinc YTZN 2021 B5IR Rep 2	0.00033826	Not significant after Bonferroni correction
2A_715409520	2A	715409520	Iron EYTBW 2021 B5IR BLUEs	0.00055308	Not significant after Bonferroni correction
2A_716906727	2A	716906727	Zinc EYTZN 2020 B5IR Rep 1	0.00054893	Not significant after Bonferroni correction
2A_716906727	2A	716906727	Iron EYTZN 2020 B5IR Rep 1	0.0009783	Not significant after Bonferroni correction
2A_727624701	2A	727624701	Iron YTZN 2020 B5IR Rep 2	0.00089533	Not significant after Bonferroni correction
2A_729345636	2A	729345636	Zinc PCZN 2021 SP Rep 1	0.00084942	Not significant after Bonferroni correction
2A_733657403	2A	733657403	Zinc EYTBW 2021 SP BLUEs	0.00052015	Not significant after Bonferroni correction
2A_733657403	2A	733657403	Zinc EYTBW 2021 SP Rep 1	0.00069276	Not significant after Bonferroni correction
2A_733700443	2A	733700443	Zinc EYTBW 2021 SP Rep 1	0.00024393	Not significant after Bonferroni correction
2A_733819257	2A	733819257	Iron PCZN 2021 SP Rep 1	0.00048449	Not significant after Bonferroni correction
2A_740095545	2A	740095545	Iron EYTBW 2021 B5IR Rep 1	0.00067234	Not significant after Bonferroni correction
2A_750111140	2A	750111140	Zinc YTBW 2020 B5IR Rep 2	0.00036341	Not significant after Bonferroni correction
2A_750144121	2A	750144121	Zinc YTBW 2020 B5IR Rep 2	0.00091561	Not significant after Bonferroni correction
2A_750225283	2A	750225283	Zinc YTBW 2020 B5IR Rep 2	0.00020242	Not significant after Bonferroni correction
2A_753261678	2A	753261678	Zinc EYTBW 2021 SP Rep 2	0.00083211	Not significant after Bonferroni correction
2A_753382980	2A	753382980	Zinc EYTBW 2021 SP Rep 2	0.00071523	Not significant after Bonferroni correction
2A_753779720	2A	753779720	Iron EYTBW 2021 all environments BLUEs	0.00045247	Not significant after Bonferroni correction
2A_754712884	2A	754712884	Iron EYTBW 2021 all environments BLUEs	0.00064325	Not significant after Bonferroni correction
2A_755058465	2A	755058465	Iron EYTBW 2021 all environments BLUEs	0.00079599	Not significant after Bonferroni correction
2A_755058546	2A	755058546	Iron EYTBW 2021 all environments BLUEs	0.00026368	Not significant after Bonferroni correction
2A_755068015	2A	755068015	Iron EYTBW 2021 all environments BLUEs	0.00059775	Not significant after Bonferroni correction
2A_755078940	2A	755078940	Iron EYTBW 2021 all environments BLUEs	0.00052005	Not significant after Bonferroni correction
2A_755107103	2A	755107103	Iron EYTBW 2021 all environments BLUEs	7.5594e-05	Not significant after Bonferroni correction
2A_755740567	2A	755740567	Iron EYTBW 2021 all environments BLUEs	7.6898e-05	Not significant after Bonferroni correction
2A_755740567	2A	755740567	Iron EYTBW 2021 SP BLUEs	0.00014941	Not significant after Bonferroni correction
2A_755740567	2A	755740567	Iron EYTBW 2021 SP Rep 1	0.00070309	Not significant after Bonferroni correction
2A_756166964	2A	756166964	Iron YTBW 2020 B5IR BLUEs	0.00032956	Not significant after Bonferroni correction
2A_756166964	2A	756166964	Iron YTBW 2020 B5IR Rep 1	0.00053439	Not significant after Bonferroni correction
2A_756611398	2A	756611398	Iron YTBW 2020 B5IR Rep 1	0.000661	Not significant after Bonferroni correction
2A_756611412	2A	756611412	Iron YTBW 2020 B5IR Rep 1	0.00060356	Not significant after Bonferroni correction
2A_756949358	2A	756949358	Iron EYTBW 2021 all environments BLUEs	0.00068054	Not significant after Bonferroni correction
2A_757985853	2A	757985853	Iron YTBW 2021 B5IR Rep 2	0.00016632	Not significant after Bonferroni correction
2A_758588563	2A	758588563	Iron YTZN 2020 B5IR BLUEs	0.00095941	Not significant after Bonferroni correction
2A_758607303	2A	758607303	Iron YTZN 2020 B5IR BLUEs	0.00043794	Not significant after Bonferroni correction
2A_758607303	2A	758607303	Zinc EYTZN 2021 B5IR BLUEs	0.00060001	Not significant after Bonferroni correction
2A_759821818	2A	759821818	Iron EYTBW 2021 all environments BLUEs	0.00018607	Not significant after Bonferroni correction
2A_760579448	2A	760579448	Zinc YTZN 2020 B5IR Rep 2	0.00041138	Not significant after Bonferroni correction
2A_760579448	2A	760579448	Zinc EYTZN 2021 B5IR Rep 2	0.0005207	Not significant after Bonferroni correction
2A_760579448	2A	760579448	Zinc EYTZN 2021 B5IR BLUEs	0.00060754	Not significant after Bonferroni correction
2A_769614284	2A	769614284	Iron EYTBW 2021 SP Rep 1	0.00037773	Not significant after Bonferroni correction
2A_769614284	2A	769614284	Iron EYTBW 2021 all environments BLUEs	0.00065811	Not significant after Bonferroni correction
2A_770713812	2A	770713812	Iron EYTBW 2021 all environments BLUEs	0.00011861	Not significant after Bonferroni correction
2A_770713812	2A	770713812	Iron EYTBW 2021 SP BLUEs	0.00023578	Not significant after Bonferroni correction
2A_771353502	2A	771353502	Zinc EYTBW 2021 SP Rep 2	0.00035556	Not significant after Bonferroni correction
2A_772884753	2A	772884753	Iron EYTBW 2021 all environments BLUEs	0.00031887	Not significant after Bonferroni correction
2A_773286526	2A	773286526	Iron EYTBW 2021 SP Rep 1	0.00055429	Not significant after Bonferroni correction
2A_773342571	2A	773342571	Iron EYTBW 2021 SP Rep 1	0.00023478	Not significant after Bonferroni correction
2A_775107786	2A	775107786	Zinc EYTBW 2021 SP BLUEs	6.7062e-05	Not significant after Bonferroni correction
2A_775107786	2A	775107786	Zinc EYTBW 2021 SP Rep 1	7.8808e-05	Not significant after Bonferroni correction
2A_779337824	2A	779337824	Iron YTZN 2020 B5IR BLUEs	0.00013541	Not significant after Bonferroni correction
2A_779337824	2A	779337824	Zinc EYTZN 2021 B5IR Rep 2	0.0005191	Not significant after Bonferroni correction
2B_739314	2B	739314	Iron EYTZN 2020 B5IR Rep 3	0.00046412	Not significant after Bonferroni correction
2B_798283	2B	798283	Iron YTZN 2021 B5IR Rep 1	0.00023497	Not significant after Bonferroni correction
2B_870084	2B	870084	Iron EYTBW 2021 B2IR BLUEs	0.00081385	Not significant after Bonferroni correction
2B_2522705	2B	2522705	Iron PCZN 2021 SP Rep 1	0.00091645	Not significant after Bonferroni correction
2B_16863488	2B	16863488	Iron EYTBW 2021 B5IR Rep 2	8.3182e-05	Not significant after Bonferroni correction
2B_16863488	2B	16863488	Zinc EYTBW 2021 B5IR Rep 2	0.00010034	Not significant after Bonferroni correction
2B_16863488	2B	16863488	Iron EYTBW 2021 B5IR BLUEs	0.00027417	Not significant after Bonferroni correction
2B_16863488	2B	16863488	Zinc EYTBW 2021 all environments BLUEs	0.00058546	Not significant after Bonferroni correction
2B_29046034	2B	29046034	Zinc EYTBW 2021 B2IR Rep 1	0.00013872	Not significant after Bonferroni correction
2B_29046034	2B	29046034	Zinc EYTBW 2021 B2IR BLUEs	0.00046218	Not significant after Bonferroni correction
2B_40323549	2B	40323549	Iron EYTBW 2021 B2IR BLUEs	0.00019466	Not significant after Bonferroni correction
2B_40323549	2B	40323549	Iron EYTBW 2021 all environments BLUEs	0.00067788	Not significant after Bonferroni correction
2B_40479012	2B	40479012	Zinc EYTBW 2021 B2IR BLUEs	0.00035358	Not significant after Bonferroni correction
2B_40479012	2B	40479012	Zinc EYTBW 2021 B2IR Rep 1	0.00089203	Not significant after Bonferroni correction
2B_49980887	2B	49980887	Iron EYTBW 2021 all environments BLUEs	0.00092878	Not significant after Bonferroni correction
2B_52990679	2B	52990679	Iron YTBW 2020 B5IR Rep 2	0.00068804	Not significant after Bonferroni correction
2B_58298863	2B	58298863	Iron EYTBW 2021 all environments BLUEs	0.00093508	Not significant after Bonferroni correction
2B_58723224	2B	58723224	Iron EYTBW 2021 SP Rep 2	0.00066482	Not significant after Bonferroni correction
2B_71594288	2B	71594288	Iron EYTBW 2021 SP Rep 2	0.00073769	Not significant after Bonferroni correction
2B_73380220	2B	73380220	Zinc EYTBW 2021 SP Rep 2	0.00036889	Not significant after Bonferroni correction
2B_73380220	2B	73380220	Zinc EYTBW 2021 all environments BLUEs	0.00072199	Not significant after Bonferroni correction
2B_95097146	2B	95097146	Zinc EYTBW 2021 B5IR Rep 1	0.00045609	Not significant after Bonferroni correction
2B_103905079	2B	103905079	Iron EYTBW 2021 SP BLUEs	0.0008574	Not significant after Bonferroni correction
2B_110963577	2B	110963577	Iron EYTBW 2021 B5IR Rep 1	0.00091087	Not significant after Bonferroni correction
2B_111070730	2B	111070730	Zinc PCZN 2018 SP Rep 1	0.00062968	Not significant after Bonferroni correction
2B_149463971	2B	149463971	Iron EYTBW 2021 B2IR BLUEs	0.00050783	Not significant after Bonferroni correction
2B_242990335	2B	242990335	Iron EYTBW 2021 SP Rep 1	4.896e-05	Not significant after Bonferroni correction
2B_246642557	2B	246642557	Iron EYTBW 2021 SP BLUEs	0.00012211	Not significant after Bonferroni correction
2B_247369978	2B	247369978	Zinc EYTZN 2021 B5IR BLUEs	0.00098441	Not significant after Bonferroni correction
2B_353075308	2B	353075308	Zinc YTZN 2020 B5IR Rep 1	0.00052914	Not significant after Bonferroni correction
2B_406877929	2B	406877929	Zinc EYTBW 2021 B5IR Rep 1	0.00025126	Not significant after Bonferroni correction
2B_419320960	2B	419320960	Iron EYTZN 2021 B5IR Rep 1	0.00068531	Not significant after Bonferroni correction
2B_423836280	2B	423836280	Iron EYTBW 2021 B2IR BLUEs	0.00053148	Not significant after Bonferroni correction
2B_522833387	2B	522833387	Zinc PCZN 2021 SP Rep 1	0.00073324	Not significant after Bonferroni correction
2B_547429774	2B	547429774	Iron EYTBW 2021 B2IR BLUEs	0.00088304	Not significant after Bonferroni correction
2B_561981065	2B	561981065	Iron EYTBW 2021 B2IR BLUEs	0.00051306	Not significant after Bonferroni correction
2B_562270248	2B	562270248	Iron EYTBW 2021 B2IR BLUEs	0.00051824	Not significant after Bonferroni correction
2B_563184715	2B	563184715	Iron EYTBW 2021 B2IR BLUEs	0.00089538	Not significant after Bonferroni correction
2B_564816352	2B	564816352	Iron EYTBW 2021 B2IR BLUEs	2.8296e-05	Not significant after Bonferroni correction
2B_564816352	2B	564816352	Iron EYTBW 2021 B2IR Rep 2	6.3639e-05	Not significant after Bonferroni correction
2B_602765846	2B	602765846	Iron EYTBW 2021 all environments BLUEs	0.00031701	Not significant after Bonferroni correction
2B_602765846	2B	602765846	Iron EYTBW 2021 B5IR BLUEs	0.0004604	Not significant after Bonferroni correction
2B_602765846	2B	602765846	Iron EYTBW 2021 B2IR Rep 2	0.00075283	Not significant after Bonferroni correction
2B_602765846	2B	602765846	Zinc combined panel B5IR % check	0.00083136	Not significant after Bonferroni correction
2B_613532321	2B	613532321	Iron YTZN 2020 B5IR Rep 3	0.00011345	Not significant after Bonferroni correction
2B_655015353	2B	655015353	Iron EYTBW 2021 B2IR BLUEs	0.00022369	Not significant after Bonferroni correction
2B_658485742	2B	658485742	Iron EYTBW 2021 B2IR Rep 1	0.00073334	Not significant after Bonferroni correction
2B_661452850	2B	661452850	Iron EYTBW 2021 B2IR BLUEs	0.00048642	Not significant after Bonferroni correction
2B_666048156	2B	666048156	Iron EYTBW 2021 B2IR Rep 1	0.00029296	Not significant after Bonferroni correction
2B_666099932	2B	666099932	Iron EYTBW 2021 B2IR Rep 1	0.00065274	Not significant after Bonferroni correction
2B_666456821	2B	666456821	Iron YTBW 2020 B5IR Rep 1	0.00050237	Not significant after Bonferroni correction
2B_666479256	2B	666479256	Iron EYTBW 2021 B2IR BLUEs	0.00016978	Not significant after Bonferroni correction
2B_666923922	2B	666923922	Iron YTBW 2020 B5IR Rep 1	0.00079062	Not significant after Bonferroni correction
2B_667274288	2B	667274288	Iron YTBW 2020 B5IR Rep 1	0.00022515	Not significant after Bonferroni correction
2B_667426036	2B	667426036	Iron YTBW 2020 B5IR Rep 1	1.9716e-05	Not significant after Bonferroni correction
2B_667426036	2B	667426036	Iron YTBW 2020 B5IR BLUEs	5.5835e-05	Not significant after Bonferroni correction
2B_667426036	2B	667426036	Zinc EYTZN 2021 B5IR Rep 1	0.00070405	Not significant after Bonferroni correction
2B_672646834	2B	672646834	Iron EYTBW 2021 B2IR BLUEs	0.00027017	Not significant after Bonferroni correction
2B_673628814	2B	673628814	Iron EYTBW 2021 B2IR BLUEs	0.00066318	Not significant after Bonferroni correction
2B_673961576	2B	673961576	Iron EYTBW 2021 B2IR BLUEs	4.8636e-05	Not significant after Bonferroni correction
2B_673961576	2B	673961576	Iron EYTBW 2021 B2IR Rep 1	0.00030063	Not significant after Bonferroni correction
2B_680321151	2B	680321151	Iron EYTBW 2021 B2IR BLUEs	0.00024593	Not significant after Bonferroni correction
2B_689306192	2B	689306192	Iron EYTBW 2021 B2IR BLUEs	0.0001229	Not significant after Bonferroni correction
2B_689306192	2B	689306192	Iron EYTBW 2021 all environments BLUEs	0.0009733	Not significant after Bonferroni correction
2B_689306234	2B	689306234	Zinc YTZN 2020 B5IR Rep 1	8.9905e-05	Not significant after Bonferroni correction
2B_689777458	2B	689777458	Iron EYTBW 2021 B2IR BLUEs	0.00097884	Not significant after Bonferroni correction
2B_691768582	2B	691768582	Iron EYTBW 2021 B2IR BLUEs	0.0001891	Not significant after Bonferroni correction
2B_691772148	2B	691772148	Iron YTZN 2019 B5IR Rep 2	0.00064099	Not significant after Bonferroni correction
2B_692615373	2B	692615373	Iron EYTBW 2021 B2IR BLUEs	0.00061841	Not significant after Bonferroni correction
2B_692735083	2B	692735083	Iron EYTBW 2021 B2IR Rep 1	0.00052493	Not significant after Bonferroni correction
2B_693074615	2B	693074615	Iron EYTBW 2021 B2IR BLUEs	6.4581e-05	Not significant after Bonferroni correction
2B_694440013	2B	694440013	Iron EYTBW 2021 B2IR BLUEs	0.0001811	Not significant after Bonferroni correction
2B_694490803	2B	694490803	Iron EYTBW 2021 B2IR BLUEs	0.000156	Not significant after Bonferroni correction
2B_694520871	2B	694520871	Iron EYTBW 2021 B2IR Rep 2	0.00028759	Not significant after Bonferroni correction
2B_695103309	2B	695103309	Iron EYTBW 2021 B2IR BLUEs	0.00020826	Not significant after Bonferroni correction
2B_700411147	2B	700411147	Iron EYTBW 2021 B2IR BLUEs	0.00032873	Not significant after Bonferroni correction
2B_700411147	2B	700411147	Iron EYTBW 2021 B2IR Rep 1	0.00086737	Not significant after Bonferroni correction
2B_701650104	2B	701650104	Zinc EYTBW 2021 B2IR Rep 2	0.0009018	Not significant after Bonferroni correction
2B_703052201	2B	703052201	Zinc EYTBW 2021 B2IR Rep 1	0.00049699	Not significant after Bonferroni correction
2B_708396545	2B	708396545	Iron EYTBW 2021 B2IR BLUEs	0.00092689	Not significant after Bonferroni correction
2B_716978331	2B	716978331	Zinc EYTBW 2021 B2IR Rep 2	0.00022331	Not significant after Bonferroni correction
2B_717010409	2B	717010409	Zinc EYTBW 2021 B2IR Rep 2	0.0007142	Not significant after Bonferroni correction
2B_717090344	2B	717090344	Zinc EYTBW 2021 B2IR Rep 2	0.00061256	Not significant after Bonferroni correction
2B_717090709	2B	717090709	Zinc EYTBW 2021 B2IR Rep 2	0.0006532	Not significant after Bonferroni correction
2B_717237729	2B	717237729	Zinc EYTBW 2021 B2IR BLUEs	0.00081128	Not significant after Bonferroni correction
2B_717237729	2B	717237729	Zinc EYTBW 2021 B2IR Rep 2	0.00098	Not significant after Bonferroni correction
2B_734266688	2B	734266688	Zinc YTBW 2020 B5IR Rep 1	0.00032238	Not significant after Bonferroni correction
2B_734266688	2B	734266688	Zinc YTBW 2020 B5IR BLUEs	0.00086704	Not significant after Bonferroni correction
2B_748575012	2B	748575012	Zinc YTBW 2020 B5IR BLUEs	0.00054008	Not significant after Bonferroni correction
2B_748575116	2B	748575116	Iron EYTBW 2021 B2IR Rep 1	0.0002757	Not significant after Bonferroni correction
2B_763493365	2B	763493365	Zinc EYTBW 2021 SP Rep 2	0.00065126	Not significant after Bonferroni correction
2B_769071732	2B	769071732	Iron EYTBW 2021 B5IR Rep 2	0.00020507	Not significant after Bonferroni correction
2B_773899161	2B	773899161	Zinc EYTZN 2020 B5IR Rep 1	0.00082365	Not significant after Bonferroni correction
2B_779255182	2B	779255182	Zinc EYTBW 2021 SP Rep 1	0.00038327	Not significant after Bonferroni correction
2B_783689439	2B	783689439	Zinc EYTZN 2021 B5IR Rep 1	0.00025644	Not significant after Bonferroni correction
2B_784436376	2B	784436376	Zinc EYTZN 2021 B5IR Rep 1	0.00022491	Not significant after Bonferroni correction
2B_784905791	2B	784905791	Zinc EYTZN 2021 B5IR Rep 1	0.00083781	Not significant after Bonferroni correction
2B_785074460	2B	785074460	Zinc EYTZN 2021 B5IR Rep 1	0.00070485	Not significant after Bonferroni correction
2B_800730006	2B	800730006	Zinc EYTBW 2021 B2IR Rep 1	0.00072556	Not significant after Bonferroni correction
2D_15857449	2D	15857449	Zinc EYTBW 2021 B2IR Rep 2	0.00043763	Not significant after Bonferroni correction
2D_15857449	2D	15857449	Zinc EYTBW 2021 B2IR BLUEs	0.0009064	Not significant after Bonferroni correction
2D_19472162	2D	19472162	Zinc EYTBW 2021 all environments BLUEs	0.0007183	Not significant after Bonferroni correction
2D_19580182	2D	19580182	Iron EYTZN 2020 B5IR Rep 3	0.00011304	Not significant after Bonferroni correction
2D_19580182	2D	19580182	Iron EYTZN 2020 B5IR BLUEs	0.00011473	Not significant after Bonferroni correction
2D_20322292	2D	20322292	Zinc EYTBW 2021 B2IR BLUEs	3.3763e-05	Not significant after Bonferroni correction
2D_20322292	2D	20322292	Zinc EYTBW 2021 B2IR Rep 2	4.5125e-05	Not significant after Bonferroni correction
2D_20330398	2D	20330398	Zinc EYTBW 2021 B2IR BLUEs	9.4378e-05	Not significant after Bonferroni correction
2D_20330398	2D	20330398	Zinc EYTBW 2021 B2IR Rep 2	0.00018291	Not significant after Bonferroni correction
2D_20349013	2D	20349013	Zinc EYTBW 2021 B2IR Rep 2	7.5501e-05	Not significant after Bonferroni correction
2D_20349013	2D	20349013	Zinc EYTBW 2021 B2IR BLUEs	0.00011014	Not significant after Bonferroni correction
2D_20381995	2D	20381995	Zinc EYTBW 2021 B2IR Rep 2	0.0003484	Not significant after Bonferroni correction
2D_20381995	2D	20381995	Zinc EYTBW 2021 B2IR BLUEs	0.00057159	Not significant after Bonferroni correction
2D_28881670	2D	28881670	Iron EYTZN 2020 B5IR BLUEs	0.00060352	Not significant after Bonferroni correction
2D_28881670	2D	28881670	Iron EYTZN 2020 B5IR Rep 3	0.00093661	Not significant after Bonferroni correction
2D_38019436	2D	38019436	Iron EYTBW 2021 all environments BLUEs	0.00071892	Not significant after Bonferroni correction
2D_45161755	2D	45161755	Iron EYTBW 2021 SP BLUEs	0.00063654	Not significant after Bonferroni correction
2D_63214629	2D	63214629	Iron YTBW 2020 B5IR BLUEs	0.00049352	Not significant after Bonferroni correction
2D_63526400	2D	63526400	Iron YTBW 2020 B5IR BLUEs	0.00076383	Not significant after Bonferroni correction
2D_63536732	2D	63536732	Iron YTBW 2020 B5IR BLUEs	0.0005999	Not significant after Bonferroni correction
2D_63634405	2D	63634405	Iron YTBW 2020 B5IR BLUEs	0.0002575	Not significant after Bonferroni correction
2D_63634405	2D	63634405	Iron YTBW 2020 B5IR Rep 1	0.00030421	Not significant after Bonferroni correction
2D_63868967	2D	63868967	Iron YTBW 2020 B5IR Rep 2	0.00031453	Not significant after Bonferroni correction
2D_63868967	2D	63868967	Iron YTBW 2020 B5IR BLUEs	0.00049549	Not significant after Bonferroni correction
2D_64597397	2D	64597397	Iron YTBW 2020 B5IR BLUEs	0.00077366	Not significant after Bonferroni correction
2D_65110180	2D	65110180	Iron YTBW 2020 B5IR BLUEs	0.00062279	Not significant after Bonferroni correction
2D_65110180	2D	65110180	Iron YTBW 2020 B5IR Rep 1	0.00078788	Not significant after Bonferroni correction
2D_65531910	2D	65531910	Iron YTBW 2020 B5IR BLUEs	0.00060604	Not significant after Bonferroni correction
2D_66144097	2D	66144097	Iron YTBW 2020 B5IR BLUEs	0.00055021	Not significant after Bonferroni correction
2D_66144097	2D	66144097	Iron YTBW 2020 B5IR Rep 1	0.0009151	Not significant after Bonferroni correction
2D_66871623	2D	66871623	Iron EYTBW 2021 B2IR Rep 1	0.00028362	Not significant after Bonferroni correction
2D_66871623	2D	66871623	Iron YTBW 2020 B5IR BLUEs	0.00098148	Not significant after Bonferroni correction
2D_69242948	2D	69242948	Iron YTBW 2020 B5IR Rep 2	0.00015787	Not significant after Bonferroni correction
2D_69242948	2D	69242948	Iron YTBW 2020 B5IR Rep 1	0.00019717	Not significant after Bonferroni correction
2D_69502623	2D	69502623	Iron YTBW 2020 B5IR BLUEs	0.00040196	Not significant after Bonferroni correction
2D_70507272	2D	70507272	Iron YTBW 2020 B5IR BLUEs	0.00031037	Not significant after Bonferroni correction
2D_70507272	2D	70507272	Iron YTBW 2020 B5IR Rep 1	0.00066559	Not significant after Bonferroni correction
2D_71205854	2D	71205854	Iron YTBW 2020 B5IR BLUEs	0.00093038	Not significant after Bonferroni correction
2D_72780208	2D	72780208	Iron YTBW 2020 B5IR BLUEs	0.00020995	Not significant after Bonferroni correction
2D_72780208	2D	72780208	Iron YTBW 2020 B5IR Rep 1	0.00078248	Not significant after Bonferroni correction
2D_72954581	2D	72954581	Iron YTBW 2020 B5IR BLUEs	0.00028734	Not significant after Bonferroni correction
2D_72954581	2D	72954581	Iron YTBW 2020 B5IR Rep 1	0.00051387	Not significant after Bonferroni correction
2D_73592194	2D	73592194	Iron YTBW 2020 B5IR BLUEs	0.0009933	Not significant after Bonferroni correction
2D_73965771	2D	73965771	Iron YTBW 2020 B5IR BLUEs	0.00073184	Not significant after Bonferroni correction
2D_75556699	2D	75556699	Iron YTBW 2020 B5IR BLUEs	0.00071851	Not significant after Bonferroni correction
2D_75556699	2D	75556699	Iron YTBW 2020 B5IR Rep 1	0.00089892	Not significant after Bonferroni correction
2D_76530008	2D	76530008	Iron YTBW 2020 B5IR Rep 1	0.00064499	Not significant after Bonferroni correction
2D_76530008	2D	76530008	Iron YTBW 2020 B5IR BLUEs	0.00072812	Not significant after Bonferroni correction
2D_76580949	2D	76580949	Iron YTBW 2020 B5IR BLUEs	0.00021517	Not significant after Bonferroni correction
2D_78710082	2D	78710082	Iron YTBW 2020 B5IR BLUEs	0.00035799	Not significant after Bonferroni correction
2D_82283457	2D	82283457	Iron EYTBW 2021 B2IR BLUEs	0.00083901	Not significant after Bonferroni correction
2D_135478757	2D	135478757	Iron EYTBW 2021 all environments BLUEs	0.00012306	Not significant after Bonferroni correction
2D_135478757	2D	135478757	Iron EYTBW 2021 B5IR Rep 1	0.0001887	Not significant after Bonferroni correction
2D_135478757	2D	135478757	Zinc EYTBW 2021 B5IR BLUEs	0.0008259	Not significant after Bonferroni correction
2D_135478757	2D	135478757	Zinc EYTBW 2021 B5IR Rep 1	0.00089159	Not significant after Bonferroni correction
2D_215596214	2D	215596214	Iron YTBW 2020 B5IR Rep 1	0.00014839	Not significant after Bonferroni correction
2D_215596214	2D	215596214	Iron YTBW 2020 B5IR BLUEs	0.00092497	Not significant after Bonferroni correction
2D_224333851	2D	224333851	Iron YTBW 2020 B5IR Rep 1	2.7284e-05	Not significant after Bonferroni correction
2D_224333851	2D	224333851	Iron YTBW 2020 B5IR BLUEs	0.00010826	Not significant after Bonferroni correction
2D_243809045	2D	243809045	Iron YTBW 2020 B5IR Rep 1	0.0001644	Not significant after Bonferroni correction
2D_284570413	2D	284570413	Iron EYTZN 2020 B5IR Rep 1	0.00029226	Not significant after Bonferroni correction
2D_284570413	2D	284570413	Iron EYTBW 2021 all environments BLUEs	0.00079209	Not significant after Bonferroni correction
2D_286384945	2D	286384945	Iron YTBW 2020 B5IR BLUEs	2.1896e-05	Not significant after Bonferroni correction
2D_286384945	2D	286384945	Iron YTZN 2019 B5IR BLUEs	7.8112e-05	Not significant after Bonferroni correction
2D_286384945	2D	286384945	Iron YTZN 2019 B5IR Rep 1	8.9717e-05	Not significant after Bonferroni correction
2D_286384945	2D	286384945	Iron combined panel B5IR % check	0.00011196	Not significant after Bonferroni correction
2D_286384945	2D	286384945	Iron EYTBW 2021 all environments BLUEs	0.00033493	Not significant after Bonferroni correction
2D_286384945	2D	286384945	Iron YTBW 2021 B5IR Rep 1	0.00067091	Not significant after Bonferroni correction
2D_290559279	2D	290559279	Iron EYTBW 2021 all environments BLUEs	0.00041349	Not significant after Bonferroni correction
2D_346584533	2D	346584533	Zinc YTBW 2020 B5IR Rep 1	0.00065987	Not significant after Bonferroni correction
2D_346584535	2D	346584535	Iron YTBW 2020 B5IR Rep 1	0.0004343	Not significant after Bonferroni correction
2D_346584535	2D	346584535	Zinc YTBW 2020 B5IR Rep 1	0.00046468	Not significant after Bonferroni correction
2D_475616899	2D	475616899	Iron EYTBW 2021 all environments BLUEs	0.00016264	Not significant after Bonferroni correction
2D_475616899	2D	475616899	Zinc EYTBW 2021 B2IR Rep 1	0.00090051	Not significant after Bonferroni correction
2D_572256847	2D	572256847	Iron EYTBW 2021 B2IR BLUEs	0.00018387	Not significant after Bonferroni correction
2D_572256847	2D	572256847	Iron EYTBW 2021 B2IR Rep 1	0.00044069	Not significant after Bonferroni correction
2D_601266784	2D	601266784	Zinc YTZN 2019 B5IR Rep 3	0.0004452	Not significant after Bonferroni correction
2D_601567327	2D	601567327	Zinc YTBW 2021 B5IR Rep 2	0.00053196	Not significant after Bonferroni correction
2D_603543256	2D	603543256	Zinc YTZN 2020 B5IR Rep 2	0.00015947	Not significant after Bonferroni correction
2D_603543256	2D	603543256	Zinc YTZN 2020 B5IR BLUEs	0.00019485	Not significant after Bonferroni correction
2D_609315703	2D	609315703	Zinc EYTBW 2021 B2IR Rep 1	0.00047	Not significant after Bonferroni correction
2D_609493910	2D	609493910	Zinc EYTBW 2021 B2IR Rep 1	0.00018079	Not significant after Bonferroni correction
2D_648168915	2D	648168915	Zinc PCZN 2021 SP Rep 1	0.00063583	Not significant after Bonferroni correction
3A_1937649	3A	1937649	Iron YTZN 2019 B5IR Rep 2	0.00010626	Not significant after Bonferroni correction
3A_1937649	3A	1937649	Iron YTZN 2019 B5IR BLUEs	0.00099873	Not significant after Bonferroni correction
3A_6254907	3A	6254907	Zinc EYTBW 2021 B2IR Rep 1	0.00086583	Not significant after Bonferroni correction
3A_16867261	3A	16867261	Zinc PCZN 2018 SP Rep 1	0.00010385	Not significant after Bonferroni correction
3A_21223614	3A	21223614	Zinc PCZN 2021 SP Rep 1	0.00092572	Not significant after Bonferroni correction
3A_22625242	3A	22625242	Iron EYTZN 2020 B5IR Rep 1	0.00021066	Not significant after Bonferroni correction
3A_22625242	3A	22625242	Iron EYTZN 2020 B5IR BLUEs	0.00045286	Not significant after Bonferroni correction
3A_23394072	3A	23394072	Iron YTZN 2021 B5IR Rep 1	0.00075577	Not significant after Bonferroni correction
3A_25879839	3A	25879839	Zinc YTBW 2020 B5IR Rep 1	0.00098114	Not significant after Bonferroni correction
3A_26820384	3A	26820384	Iron PCZN 2021 SP Rep 1	0.00012538	Not significant after Bonferroni correction
3A_39734771	3A	39734771	Iron YTZN 2021 B5IR Rep 1	0.00030579	Not significant after Bonferroni correction
3A_52103643	3A	52103643	Zinc EYTBW 2021 SP Rep 1	0.00039842	Not significant after Bonferroni correction
3A_54163398	3A	54163398	Zinc EYTBW 2021 SP Rep 1	0.00066013	Not significant after Bonferroni correction
3A_54163398	3A	54163398	Zinc EYTBW 2021 SP BLUEs	0.00074898	Not significant after Bonferroni correction
3A_58953738	3A	58953738	Zinc YTBW 2020 B5IR BLUEs	0.0005988	Not significant after Bonferroni correction
3A_58953738	3A	58953738	Zinc YTBW 2020 B5IR Rep 1	0.00074083	Not significant after Bonferroni correction
3A_65825687	3A	65825687	Iron EYTBW 2021 all environments BLUEs	0.00078443	Not significant after Bonferroni correction
3A_65825687	3A	65825687	Iron EYTBW 2021 B2IR BLUEs	0.00080542	Not significant after Bonferroni correction
3A_72256581	3A	72256581	Zinc EYTBW 2021 B2IR Rep 1	0.0002512	Not significant after Bonferroni correction
3A_143491853	3A	143491853	Iron EYTBW 2021 all environments BLUEs	0.00056738	Not significant after Bonferroni correction
3A_143491853	3A	143491853	Zinc YTBW 2021 B5IR Rep 2	0.00091924	Not significant after Bonferroni correction
3A_144145519	3A	144145519	Zinc EYTZN 2021 B5IR Rep 1	0.00015452	Not significant after Bonferroni correction
3A_435447288	3A	435447288	Iron EYTBW 2021 B2IR BLUEs	0.00073709	Not significant after Bonferroni correction
3A_448654329	3A	448654329	Iron EYTZN 2021 B5IR Rep 2	0.00065206	Not significant after Bonferroni correction
3A_476383953	3A	476383953	Iron YTBW 2020 B5IR Rep 2	0.00018707	Not significant after Bonferroni correction
3A_476383953	3A	476383953	Iron YTBW 2020 B5IR BLUEs	0.00041025	Not significant after Bonferroni correction
3A_477136352	3A	477136352	Zinc YTBW 2020 B5IR Rep 1	0.00063265	Not significant after Bonferroni correction
3A_487256902	3A	487256902	Zinc YTBW 2020 B5IR Rep 1	0.00014923	Not significant after Bonferroni correction
3A_487256902	3A	487256902	Zinc YTBW 2020 B5IR BLUEs	0.00061582	Not significant after Bonferroni correction
3A_489310872	3A	489310872	Zinc EYTZN 2021 B5IR Rep 1	0.00084449	Not significant after Bonferroni correction
3A_502497791	3A	502497791	Zinc EYTBW 2021 B5IR Rep 1	0.00019177	Not significant after Bonferroni correction
3A_510719536	3A	510719536	Iron EYTBW 2021 B2IR BLUEs	0.0002381	Not significant after Bonferroni correction
3A_518907688	3A	518907688	Zinc YTBW 2021 B5IR Rep 1	0.00095557	Not significant after Bonferroni correction
3A_532468678	3A	532468678	Zinc YTBW 2021 B5IR Rep 1	0.00083996	Not significant after Bonferroni correction
3A_533994803	3A	533994803	Zinc YTBW 2020 B5IR BLUEs	0.00052699	Not significant after Bonferroni correction
3A_533994803	3A	533994803	Zinc YTBW 2020 B5IR Rep 2	0.00062354	Not significant after Bonferroni correction
3A_556260101	3A	556260101	Iron EYTBW 2021 B2IR BLUEs	1.8638e-05	Not significant after Bonferroni correction
3A_556260101	3A	556260101	Iron EYTBW 2021 B2IR Rep 1	0.00038905	Not significant after Bonferroni correction
3A_648020824	3A	648020824	Zinc EYTBW 2021 B2IR Rep 2	0.0005179	Not significant after Bonferroni correction
3A_659159211	3A	659159211	Zinc YTZN 2020 B5IR Rep 2	0.00011091	Not significant after Bonferroni correction
3A_659162358	3A	659162358	Zinc YTZN 2020 B5IR Rep 2	0.00039201	Not significant after Bonferroni correction
3A_659798530	3A	659798530	Zinc YTZN 2020 B5IR Rep 2	0.00042601	Not significant after Bonferroni correction
3A_662792936	3A	662792936	Iron EYTBW 2021 B2IR Rep 1	0.00028471	Not significant after Bonferroni correction
3A_662792936	3A	662792936	Iron EYTBW 2021 B2IR BLUEs	0.00059166	Not significant after Bonferroni correction
3A_669564706	3A	669564706	Iron EYTBW 2021 B5IR Rep 2	0.00011513	Not significant after Bonferroni correction
3A_675313885	3A	675313885	Zinc EYTBW 2021 B2IR BLUEs	0.00012869	Not significant after Bonferroni correction
3A_675313885	3A	675313885	Zinc EYTBW 2021 B2IR Rep 2	0.00013491	Not significant after Bonferroni correction
3A_688984361	3A	688984361	Iron EYTZN 2020 B5IR Rep 2	0.00074008	Not significant after Bonferroni correction
3A_713539294	3A	713539294	Zinc EYTBW 2021 SP BLUEs	0.0008162	Not significant after Bonferroni correction
3A_715444786	3A	715444786	Zinc combined panel B5IR % check	0.00031584	Not significant after Bonferroni correction
3A_726993908	3A	726993908	Iron PCZN 2021 SP Rep 1	0.00053182	Not significant after Bonferroni correction
3A_727358316	3A	727358316	Iron EYTBW 2021 B5IR Rep 2	0.00087895	Not significant after Bonferroni correction
3A_731226014	3A	731226014	Zinc YTBW 2021 B5IR Rep 1	8.6113e-05	Not significant after Bonferroni correction
3A_731226014	3A	731226014	Zinc YTBW 2021 B5IR BLUEs	0.00029509	Not significant after Bonferroni correction
3A_731514801	3A	731514801	Zinc YTBW 2020 B5IR Rep 2	0.00097887	Not significant after Bonferroni correction
3A_735592821	3A	735592821	Iron EYTBW 2021 B2IR Rep 2	0.00028061	Not significant after Bonferroni correction
3A_736973919	3A	736973919	Iron EYTBW 2021 all environments BLUEs	0.00026614	Not significant after Bonferroni correction
3A_743234772	3A	743234772	Iron YTBW 2020 B5IR Rep 1	0.00095402	Not significant after Bonferroni correction
3A_749402874	3A	749402874	Iron EYTBW 2021 SP BLUEs	0.00089235	Not significant after Bonferroni correction
3A_749862398	3A	749862398	Zinc EYTBW 2021 SP Rep 1	0.00037934	Not significant after Bonferroni correction
3B_680659	3B	680659	Iron EYTBW 2021 B2IR Rep 1	0.00048119	Not significant after Bonferroni correction
3B_9570369	3B	9570369	Iron EYTBW 2021 B2IR Rep 1	0.0003278	Not significant after Bonferroni correction
3B_9570369	3B	9570369	Iron EYTBW 2021 B2IR BLUEs	0.00095973	Not significant after Bonferroni correction
3B_17070378	3B	17070378	Iron EYTBW 2021 B2IR Rep 2	0.00012022	Not significant after Bonferroni correction
3B_28804852	3B	28804852	Iron YTBW 2020 B5IR Rep 2	0.00050644	Not significant after Bonferroni correction
3B_28804852	3B	28804852	Iron YTBW 2020 B5IR BLUEs	0.00061924	Not significant after Bonferroni correction
3B_31663331	3B	31663331	Iron EYTBW 2021 B2IR Rep 2	0.00053939	Not significant after Bonferroni correction
3B_48665283	3B	48665283	Zinc YTBW 2020 B5IR Rep 2	0.00042024	Not significant after Bonferroni correction
3B_60737258	3B	60737258	Zinc YTZN 2019 B5IR Rep 2	0.00033288	Not significant after Bonferroni correction
3B_82495634	3B	82495634	Zinc YTBW 2020 B5IR Rep 1	0.00076257	Not significant after Bonferroni correction
3B_82495634	3B	82495634	Zinc YTBW 2020 B5IR BLUEs	0.00077259	Not significant after Bonferroni correction
3B_95751880	3B	95751880	Zinc YTZN 2019 B5IR Rep 3	0.00031922	Not significant after Bonferroni correction
3B_125930373	3B	125930373	Zinc YTBW 2020 B5IR Rep 1	0.00049363	Not significant after Bonferroni correction
3B_125930410	3B	125930410	Zinc YTBW 2020 B5IR Rep 1	0.00063307	Not significant after Bonferroni correction
3B_142241701	3B	142241701	Zinc YTBW 2020 B5IR BLUEs	0.00037504	Not significant after Bonferroni correction
3B_142241701	3B	142241701	Zinc YTBW 2020 B5IR Rep 1	0.00088401	Not significant after Bonferroni correction
3B_242174561	3B	242174561	Zinc YTBW 2020 B5IR BLUEs	0.00054906	Not significant after Bonferroni correction
3B_560591465	3B	560591465	Zinc YTZN 2019 B5IR Rep 3	0.00050467	Not significant after Bonferroni correction
3B_567807780	3B	567807780	Zinc EYTBW 2021 B2IR Rep 1	0.00032473	Not significant after Bonferroni correction
3B_690092770	3B	690092770	Zinc EYTZN 2021 B5IR BLUEs	0.00022064	Not significant after Bonferroni correction
3B_690092770	3B	690092770	Zinc EYTZN 2021 B5IR Rep 1	0.00037363	Not significant after Bonferroni correction
3B_707576896	3B	707576896	Zinc YTBW 2020 B5IR BLUEs	0.00034718	Not significant after Bonferroni correction
3B_711071642	3B	711071642	Zinc YTBW 2020 B5IR BLUEs	0.00068356	Not significant after Bonferroni correction
3B_711379354	3B	711379354	Zinc YTBW 2020 B5IR BLUEs	0.00030889	Not significant after Bonferroni correction
3B_711881968	3B	711881968	Zinc YTBW 2020 B5IR BLUEs	0.00058411	Not significant after Bonferroni correction
3B_734497793	3B	734497793	Zinc YTBW 2020 B5IR BLUEs	0.00027608	Not significant after Bonferroni correction
3B_734497793	3B	734497793	Iron EYTBW 2021 B2IR Rep 1	0.0006334	Not significant after Bonferroni correction
3B_734497793	3B	734497793	Zinc YTBW 2020 B5IR Rep 2	0.00086531	Not significant after Bonferroni correction
3B_735416813	3B	735416813	Zinc YTBW 2020 B5IR Rep 2	0.00055828	Not significant after Bonferroni correction
3B_736313377	3B	736313377	Zinc YTBW 2020 B5IR Rep 2	0.00085888	Not significant after Bonferroni correction
3B_736410298	3B	736410298	Zinc YTBW 2020 B5IR BLUEs	0.00075085	Not significant after Bonferroni correction
3B_737069696	3B	737069696	Zinc YTBW 2020 B5IR Rep 2	0.00060725	Not significant after Bonferroni correction
3B_737596601	3B	737596601	Zinc YTBW 2020 B5IR Rep 2	0.00052517	Not significant after Bonferroni correction
3B_738504067	3B	738504067	Zinc YTBW 2021 B5IR Rep 1	0.00054283	Not significant after Bonferroni correction
3B_739026297	3B	739026297	Zinc YTBW 2021 B5IR Rep 1	0.00069537	Not significant after Bonferroni correction
3B_742110340	3B	742110340	Zinc YTBW 2020 B5IR Rep 2	0.00024344	Not significant after Bonferroni correction
3B_742110340	3B	742110340	Zinc YTBW 2020 B5IR BLUEs	0.00090024	Not significant after Bonferroni correction
3B_742457591	3B	742457591	Zinc YTBW 2020 B5IR BLUEs	6.6829e-05	Not significant after Bonferroni correction
3B_742457591	3B	742457591	Zinc YTBW 2020 B5IR Rep 2	0.00010623	Not significant after Bonferroni correction
3B_742465783	3B	742465783	Zinc YTBW 2020 B5IR BLUEs	0.00061997	Not significant after Bonferroni correction
3B_742465783	3B	742465783	Zinc YTBW 2020 B5IR Rep 2	0.00062912	Not significant after Bonferroni correction
3B_742548604	3B	742548604	Zinc YTBW 2020 B5IR BLUEs	0.00023603	Not significant after Bonferroni correction
3B_742548604	3B	742548604	Zinc YTBW 2020 B5IR Rep 2	0.00028102	Not significant after Bonferroni correction
3B_742659357	3B	742659357	Zinc YTBW 2020 B5IR Rep 2	0.00061799	Not significant after Bonferroni correction
3B_743812482	3B	743812482	Zinc YTBW 2020 B5IR Rep 2	0.00030015	Not significant after Bonferroni correction
3B_743812482	3B	743812482	Zinc YTBW 2020 B5IR BLUEs	0.00077146	Not significant after Bonferroni correction
3B_749024831	3B	749024831	Zinc YTBW 2020 B5IR Rep 2	0.00034663	Not significant after Bonferroni correction
3B_749024831	3B	749024831	Zinc YTBW 2020 B5IR BLUEs	0.00040332	Not significant after Bonferroni correction
3B_750897696	3B	750897696	Zinc YTBW 2020 B5IR Rep 2	0.00043567	Not significant after Bonferroni correction
3B_755079586	3B	755079586	Zinc YTBW 2020 B5IR Rep 1	0.00020859	Not significant after Bonferroni correction
3B_755079586	3B	755079586	Zinc YTBW 2020 B5IR BLUEs	0.00027261	Not significant after Bonferroni correction
3B_756626946	3B	756626946	Zinc YTBW 2020 B5IR Rep 2	2.7253e-05	Not significant after Bonferroni correction
3B_756626946	3B	756626946	Zinc YTBW 2021 B5IR Rep 1	0.00016128	Not significant after Bonferroni correction
3B_756626946	3B	756626946	Zinc YTBW 2020 B5IR Rep 1	0.00029765	Not significant after Bonferroni correction
3B_756889088	3B	756889088	Zinc YTBW 2021 B5IR Rep 2	0.00017361	Not significant after Bonferroni correction
3B_756889088	3B	756889088	Iron EYTBW 2021 all environments BLUEs	0.00063521	Not significant after Bonferroni correction
3B_758201335	3B	758201335	Zinc YTBW 2021 B5IR Rep 1	0.00033804	Not significant after Bonferroni correction
3B_758201335	3B	758201335	Zinc YTBW 2020 B5IR Rep 2	0.00049061	Not significant after Bonferroni correction
3B_764314025	3B	764314025	Zinc EYTBW 2021 B2IR BLUEs	0.00075517	Not significant after Bonferroni correction
3B_771689170	3B	771689170	Iron YTZN 2020 B5IR Rep 2	2.8171e-05	Not significant after Bonferroni correction
3B_771689170	3B	771689170	Iron YTZN 2020 B5IR BLUEs	5.015e-05	Not significant after Bonferroni correction
3B_787804962	3B	787804962	Zinc PCZN 2018 SP Rep 1	0.00045424	Not significant after Bonferroni correction
3B_790608443	3B	790608443	Zinc EYTBW 2021 all environments BLUEs	0.00014901	Not significant after Bonferroni correction
3B_790608443	3B	790608443	Iron EYTBW 2021 B5IR BLUEs	0.00080189	Not significant after Bonferroni correction
3B_794884822	3B	794884822	Iron EYTBW 2021 B2IR Rep 2	0.00015721	Not significant after Bonferroni correction
3B_794884822	3B	794884822	Iron EYTBW 2021 all environments BLUEs	0.00050844	Not significant after Bonferroni correction
3B_795569963	3B	795569963	Iron EYTBW 2021 B2IR Rep 1	0.00027476	Not significant after Bonferroni correction
3B_818494935	3B	818494935	Zinc YTBW 2020 B5IR BLUEs	0.00093242	Not significant after Bonferroni correction
3B_822180082	3B	822180082	Iron EYTZN 2020 B5IR BLUEs	0.00068954	Not significant after Bonferroni correction
3B_823583003	3B	823583003	Iron EYTZN 2020 B5IR Rep 1	0.00049975	Not significant after Bonferroni correction
3B_823838192	3B	823838192	Zinc EYTBW 2021 B2IR BLUEs	0.00094758	Not significant after Bonferroni correction
3B_823875455	3B	823875455	Iron EYTZN 2020 B5IR Rep 1	0.00018547	Not significant after Bonferroni correction
3B_825490091	3B	825490091	Iron EYTZN 2020 B5IR Rep 1	0.00029405	Not significant after Bonferroni correction
3B_825858545	3B	825858545	Iron EYTZN 2020 B5IR BLUEs	0.00048726	Not significant after Bonferroni correction
3B_826654792	3B	826654792	Iron YTZN 2019 B5IR Rep 3	0.00051765	Not significant after Bonferroni correction
3B_828301472	3B	828301472	Iron EYTZN 2020 B5IR Rep 1	0.00040786	Not significant after Bonferroni correction
3B_829472747	3B	829472747	Zinc YTZN 2019 B5IR Rep 1	0.00091794	Not significant after Bonferroni correction
3D_26956164	3D	26956164	Iron YTBW 2020 B5IR Rep 1	0.00057718	Not significant after Bonferroni correction
3D_48836648	3D	48836648	Zinc EYTBW 2021 B5IR Rep 1	0.00081394	Not significant after Bonferroni correction
3D_169392981	3D	169392981	Iron EYTBW 2021 all environments BLUEs	0.00034672	Not significant after Bonferroni correction
3D_177038832	3D	177038832	Iron YTBW 2020 B5IR BLUEs	7.4495e-05	Not significant after Bonferroni correction
3D_177038832	3D	177038832	Iron EYTBW 2021 B2IR BLUEs	0.00012831	Not significant after Bonferroni correction
3D_177038832	3D	177038832	Iron EYTBW 2021 all environments BLUEs	0.00019988	Not significant after Bonferroni correction
3D_177038832	3D	177038832	Iron YTBW 2020 B5IR Rep 1	0.00020886	Not significant after Bonferroni correction
3D_177038832	3D	177038832	Iron EYTBW 2021 B2IR Rep 1	0.00035079	Not significant after Bonferroni correction
3D_179533184	3D	179533184	Iron EYTBW 2021 B2IR Rep 1	0.00021994	Not significant after Bonferroni correction
3D_179533184	3D	179533184	Iron YTBW 2020 B5IR BLUEs	0.00030409	Not significant after Bonferroni correction
3D_206028658	3D	206028658	Iron YTBW 2020 B5IR Rep 1	0.00089507	Not significant after Bonferroni correction
3D_291712985	3D	291712985	Zinc EYTBW 2021 B5IR Rep 1	0.00048752	Not significant after Bonferroni correction
3D_381888611	3D	381888611	Iron combined panel B5IR % check	0.00011754	Not significant after Bonferroni correction
3D_529775477	3D	529775477	Zinc YTZN 2019 B5IR Rep 1	0.00054676	Not significant after Bonferroni correction
3D_535221821	3D	535221821	Iron YTBW 2020 B5IR Rep 1	0.00045373	Not significant after Bonferroni correction
3D_554140351	3D	554140351	Iron EYTBW 2021 all environments BLUEs	0.00019007	Not significant after Bonferroni correction
3D_600181658	3D	600181658	Iron EYTBW 2021 all environments BLUEs	0.0009243	Not significant after Bonferroni correction
3D_600181658	3D	600181658	Iron EYTBW 2021 B2IR BLUEs	0.00093418	Not significant after Bonferroni correction
3D_600181724	3D	600181724	Iron EYTBW 2021 all environments BLUEs	0.00036812	Not significant after Bonferroni correction
3D_601442355	3D	601442355	Iron EYTBW 2021 all environments BLUEs	0.0006644	Not significant after Bonferroni correction
3D_603625341	3D	603625341	Iron EYTZN 2020 B5IR Rep 1	0.00054653	Not significant after Bonferroni correction
4A_4780964	4A	4780964	Zinc YTZN 2019 B5IR Rep 3	0.00072077	Not significant after Bonferroni correction
4A_37291665	4A	37291665	Iron EYTBW 2021 B5IR Rep 1	0.00020786	Not significant after Bonferroni correction
4A_37291665	4A	37291665	Iron EYTBW 2021 B5IR BLUEs	0.00057225	Not significant after Bonferroni correction
4A_68560061	4A	68560061	Zinc combined panel B5IR % check	0.00051823	Not significant after Bonferroni correction
4A_68560061	4A	68560061	Zinc EYTBW 2021 B5IR BLUEs	0.00092602	Not significant after Bonferroni correction
4A_87400962	4A	87400962	Zinc YTZN 2021 B5IR BLUEs	0.00059815	Not significant after Bonferroni correction
4A_226190688	4A	226190688	Iron EYTZN 2020 B5IR Rep 3	0.0003108	Not significant after Bonferroni correction
4A_507588893	4A	507588893	Zinc EYTBW 2021 SP Rep 2	0.00054812	Not significant after Bonferroni correction
4A_558059830	4A	558059830	Zinc EYTBW 2021 B2IR Rep 2	6.567e-05	Not significant after Bonferroni correction
4A_558059830	4A	558059830	Zinc EYTBW 2021 SP Rep 2	8.6552e-05	Not significant after Bonferroni correction
4A_558059830	4A	558059830	Zinc EYTBW 2021 B2IR BLUEs	0.00048714	Not significant after Bonferroni correction
4A_584515096	4A	584515096	Zinc EYTBW 2021 SP Rep 2	0.00092663	Not significant after Bonferroni correction
4A_603050415	4A	603050415	Zinc YTZN 2019 B5IR Rep 1	0.00030486	Not significant after Bonferroni correction
4A_612662321	4A	612662321	Iron YTZN 2021 B5IR Rep 2	0.00015429	Not significant after Bonferroni correction
4A_620940732	4A	620940732	Zinc EYTZN 2020 B5IR BLUEs	0.00054089	Not significant after Bonferroni correction
4A_622443498	4A	622443498	Zinc YTZN 2021 B5IR Rep 2	0.000992	Not significant after Bonferroni correction
4A_631976793	4A	631976793	Iron EYTBW 2021 B2IR Rep 1	0.0002763	Not significant after Bonferroni correction
4A_641399820	4A	641399820	Iron EYTBW 2021 all environments BLUEs	0.00078567	Not significant after Bonferroni correction
4A_646730848	4A	646730848	Iron EYTBW 2021 B5IR BLUEs	0.00036374	Not significant after Bonferroni correction
4A_646730848	4A	646730848	Iron EYTBW 2021 B5IR Rep 2	0.00039718	Not significant after Bonferroni correction
4A_646730848	4A	646730848	Iron EYTBW 2021 all environments BLUEs	0.00040103	Not significant after Bonferroni correction
4A_646730856	4A	646730856	Iron EYTBW 2021 all environments BLUEs	0.00023237	Not significant after Bonferroni correction
4A_646730856	4A	646730856	Iron EYTBW 2021 B5IR Rep 2	0.00068667	Not significant after Bonferroni correction
4A_647917670	4A	647917670	Zinc EYTBW 2021 B2IR Rep 1	0.00069958	Not significant after Bonferroni correction
4A_663677733	4A	663677733	Zinc YTBW 2021 B5IR Rep 1	0.00062859	Not significant after Bonferroni correction
4A_672513731	4A	672513731	Zinc YTBW 2021 B5IR Rep 1	0.00036613	Not significant after Bonferroni correction
4A_672877364	4A	672877364	Zinc YTBW 2021 B5IR BLUEs	0.00012401	Not significant after Bonferroni correction
4A_672877364	4A	672877364	Zinc YTBW 2021 B5IR Rep 2	0.00022898	Not significant after Bonferroni correction
4A_690667669	4A	690667669	Zinc YTBW 2020 B5IR Rep 2	0.00063546	Not significant after Bonferroni correction
4A_691140722	4A	691140722	Iron EYTBW 2021 B2IR Rep 1	0.0008144	Not significant after Bonferroni correction
4A_694753000	4A	694753000	Iron EYTBW 2021 B2IR BLUEs	0.00093224	Not significant after Bonferroni correction
4A_701653464	4A	701653464	Zinc YTBW 2021 B5IR Rep 2	0.00076816	Not significant after Bonferroni correction
4A_702330247	4A	702330247	Zinc EYTBW 2021 B2IR Rep 1	0.00045114	Not significant after Bonferroni correction
4A_703167907	4A	703167907	Zinc YTBW 2020 B5IR BLUEs	9.5459e-05	Not significant after Bonferroni correction
4A_703167907	4A	703167907	Zinc YTBW 2020 B5IR Rep 2	0.00029827	Not significant after Bonferroni correction
4A_703167907	4A	703167907	Zinc YTBW 2020 B5IR Rep 1	0.00066658	Not significant after Bonferroni correction
4A_703167907	4A	703167907	Iron YTBW 2020 B5IR BLUEs	0.00084784	Not significant after Bonferroni correction
4A_703167987	4A	703167987	Zinc YTBW 2020 B5IR BLUEs	0.00034956	Not significant after Bonferroni correction
4A_703167987	4A	703167987	Zinc YTBW 2020 B5IR Rep 2	0.00049876	Not significant after Bonferroni correction
4A_703167987	4A	703167987	Iron YTBW 2020 B5IR Rep 2	0.00073323	Not significant after Bonferroni correction
4A_703230434	4A	703230434	Iron EYTBW 2021 all environments BLUEs	0.00025894	Not significant after Bonferroni correction
4A_707868791	4A	707868791	Zinc YTBW 2020 B5IR BLUEs	0.00085324	Not significant after Bonferroni correction
4A_709116087	4A	709116087	Iron combined panel B5IR % check	0.00078773	Not significant after Bonferroni correction
4A_709206204	4A	709206204	Zinc YTBW 2020 B5IR Rep 2	0.00060304	Not significant after Bonferroni correction
4A_709684361	4A	709684361	Zinc YTBW 2020 B5IR Rep 2	0.00049351	Not significant after Bonferroni correction
4A_709684361	4A	709684361	Zinc YTBW 2020 B5IR BLUEs	0.00070678	Not significant after Bonferroni correction
4A_709806404	4A	709806404	Zinc YTBW 2020 B5IR Rep 2	0.00037884	Not significant after Bonferroni correction
4A_709851729	4A	709851729	Iron EYTBW 2021 all environments BLUEs	0.00038363	Not significant after Bonferroni correction
4A_710177715	4A	710177715	Zinc YTBW 2020 B5IR BLUEs	0.00057618	Not significant after Bonferroni correction
4A_710177715	4A	710177715	Iron EYTBW 2021 all environments BLUEs	0.00062129	Not significant after Bonferroni correction
4A_710177715	4A	710177715	Zinc YTBW 2020 B5IR Rep 2	0.00072141	Not significant after Bonferroni correction
4A_711228574	4A	711228574	Iron EYTBW 2021 all environments BLUEs	9.2191e-05	Not significant after Bonferroni correction
4A_711229076	4A	711229076	Iron EYTBW 2021 all environments BLUEs	0.00039678	Not significant after Bonferroni correction
4A_711229076	4A	711229076	Iron EYTBW 2021 B5IR BLUEs	0.00098594	Not significant after Bonferroni correction
4A_711229113	4A	711229113	Iron EYTBW 2021 all environments BLUEs	0.0001099	Not significant after Bonferroni correction
4A_711331984	4A	711331984	Iron EYTBW 2021 all environments BLUEs	2.4182e-05	Not significant after Bonferroni correction
4A_711664614	4A	711664614	Iron EYTBW 2021 all environments BLUEs	3.4688e-05	Not significant after Bonferroni correction
4A_711664614	4A	711664614	Iron EYTBW 2021 B5IR BLUEs	0.00088056	Not significant after Bonferroni correction
4A_712151647	4A	712151647	Iron EYTBW 2021 all environments BLUEs	0.00021447	Not significant after Bonferroni correction
4A_717628963	4A	717628963	Zinc YTBW 2021 B5IR Rep 1	0.00043198	Not significant after Bonferroni correction
4A_719976216	4A	719976216	Iron YTZN 2021 B5IR Rep 1	0.00017794	Not significant after Bonferroni correction
4A_725538462	4A	725538462	Zinc EYTZN 2020 B5IR Rep 3	0.00021554	Not significant after Bonferroni correction
4A_742463696	4A	742463696	Zinc YTBW 2020 B5IR Rep 2	0.00022861	Not significant after Bonferroni correction
4A_742608382	4A	742608382	Zinc YTBW 2020 B5IR Rep 2	0.0001856	Not significant after Bonferroni correction
4A_742608382	4A	742608382	Iron YTZN 2021 B5IR Rep 1	0.00091643	Not significant after Bonferroni correction
4A_742751446	4A	742751446	Zinc YTBW 2020 B5IR Rep 2	0.00024773	Not significant after Bonferroni correction
4A_742751446	4A	742751446	Iron YTZN 2021 B5IR Rep 1	0.00089636	Not significant after Bonferroni correction
4A_742791963	4A	742791963	Iron YTBW 2020 B5IR BLUEs	0.00017227	Not significant after Bonferroni correction
4B_622455	4B	622455	Iron YTBW 2020 B5IR BLUEs	0.00049073	Not significant after Bonferroni correction
4B_622455	4B	622455	Iron combined panel B5IR % check	0.00099577	Not significant after Bonferroni correction
4B_1114441	4B	1114441	Iron EYTBW 2021 all environments BLUEs	0.0008717	Not significant after Bonferroni correction
4B_1114441	4B	1114441	Zinc EYTBW 2021 B5IR Rep 1	0.00092253	Not significant after Bonferroni correction
4B_3711054	4B	3711054	Iron combined panel B5IR % check	0.00070201	Not significant after Bonferroni correction
4B_3854505	4B	3854505	Iron YTZN 2019 B5IR Rep 2	0.00035567	Not significant after Bonferroni correction
4B_6674223	4B	6674223	Zinc YTZN 2021 B5IR Rep 2	0.00049248	Not significant after Bonferroni correction
4B_14001023	4B	14001023	Iron YTBW 2020 B5IR Rep 1	0.0001407	Not significant after Bonferroni correction
4B_14001023	4B	14001023	Iron YTBW 2020 B5IR BLUEs	0.0007354	Not significant after Bonferroni correction
4B_14001061	4B	14001061	Iron YTBW 2020 B5IR Rep 1	0.00017725	Not significant after Bonferroni correction
4B_14001061	4B	14001061	Iron YTBW 2020 B5IR BLUEs	0.00069575	Not significant after Bonferroni correction
4B_14396319	4B	14396319	Iron YTBW 2020 B5IR BLUEs	3.2186e-05	Not significant after Bonferroni correction
4B_14396319	4B	14396319	Iron combined panel B5IR % check	0.00070779	Not significant after Bonferroni correction
4B_14396319	4B	14396319	Zinc EYTZN 2021 B5IR Rep 2	0.00077312	Not significant after Bonferroni correction
4B_14653083	4B	14653083	Iron YTBW 2020 B5IR BLUEs	2.1998e-05	Not significant after Bonferroni correction
4B_18703228	4B	18703228	Iron YTZN 2019 B5IR Rep 1	3.8955e-05	Not significant after Bonferroni correction
4B_20567798	4B	20567798	Iron combined panel B5IR % check	0.00029327	Not significant after Bonferroni correction
4B_20567798	4B	20567798	Iron YTZN 2019 B5IR Rep 3	0.00042961	Not significant after Bonferroni correction
4B_20567798	4B	20567798	Iron YTZN 2019 B5IR Rep 1	0.00068451	Not significant after Bonferroni correction
4B_20568400	4B	20568400	Iron YTZN 2019 B5IR Rep 1	0.00035735	Not significant after Bonferroni correction
4B_20679079	4B	20679079	Iron YTBW 2020 B5IR BLUEs	1.9273e-05	Not significant after Bonferroni correction
4B_21378087	4B	21378087	Iron YTBW 2020 B5IR Rep 1	2.1788e-05	Not significant after Bonferroni correction
4B_21378087	4B	21378087	Iron YTBW 2020 B5IR Rep 2	0.00018211	Not significant after Bonferroni correction
4B_21378087	4B	21378087	Iron EYTBW 2021 all environments BLUEs	0.00034031	Not significant after Bonferroni correction
4B_21379808	4B	21379808	Iron YTBW 2020 B5IR Rep 1	5.1064e-05	Not significant after Bonferroni correction
4B_21379808	4B	21379808	Iron YTBW 2020 B5IR Rep 2	0.00010243	Not significant after Bonferroni correction
4B_21379808	4B	21379808	Iron EYTBW 2021 B5IR Rep 2	0.00059548	Not significant after Bonferroni correction
4B_21379808	4B	21379808	Iron EYTBW 2021 B5IR BLUEs	0.00062977	Not significant after Bonferroni correction
4B_21379808	4B	21379808	Iron EYTBW 2021 all environments BLUEs	0.00064666	Not significant after Bonferroni correction
4B_41870978	4B	41870978	Zinc YTZN 2019 B5IR Rep 2	0.0008482	Not significant after Bonferroni correction
4B_101301774	4B	101301774	Iron YTZN 2019 B5IR BLUEs	0.0005035	Not significant after Bonferroni correction
4B_101301774	4B	101301774	Zinc YTZN 2019 B5IR Rep 1	0.00087381	Not significant after Bonferroni correction
4B_102702464	4B	102702464	Zinc EYTBW 2021 B5IR BLUEs	0.00059558	Not significant after Bonferroni correction
4B_105478427	4B	105478427	Zinc EYTZN 2020 B5IR BLUEs	0.00038224	Not significant after Bonferroni correction
4B_105957097	4B	105957097	Zinc YTZN 2019 B5IR BLUEs	0.00013134	Not significant after Bonferroni correction
4B_140960705	4B	140960705	Zinc YTZN 2019 B5IR Rep 2	0.00019681	Not significant after Bonferroni correction
4B_399360686	4B	399360686	Zinc EYTBW 2021 B5IR BLUEs	0.00054606	Not significant after Bonferroni correction
4B_414184900	4B	414184900	Zinc EYTBW 2021 SP BLUEs	3.6983e-05	Not significant after Bonferroni correction
4B_484015990	4B	484015990	Zinc EYTBW 2021 B2IR BLUEs	0.00070638	Not significant after Bonferroni correction
4B_484015990	4B	484015990	Zinc EYTBW 2021 B2IR Rep 2	0.00098081	Not significant after Bonferroni correction
4B_519404696	4B	519404696	Iron YTZN 2019 B5IR Rep 1	0.00010309	Not significant after Bonferroni correction
4B_519404696	4B	519404696	Zinc YTZN 2019 B5IR Rep 1	0.00021161	Not significant after Bonferroni correction
4B_519477927	4B	519477927	Iron YTZN 2019 B5IR Rep 1	0.00055317	Not significant after Bonferroni correction
4B_535979111	4B	535979111	Zinc EYTBW 2021 SP Rep 2	0.0007359	Not significant after Bonferroni correction
4B_536121564	4B	536121564	Zinc EYTBW 2021 B5IR BLUEs	0.00023369	Not significant after Bonferroni correction
4B_542291739	4B	542291739	Zinc EYTZN 2020 B5IR Rep 1	0.00041874	Not significant after Bonferroni correction
4B_568655527	4B	568655527	Iron EYTBW 2021 B2IR BLUEs	0.00056392	Not significant after Bonferroni correction
4B_572128780	4B	572128780	Zinc EYTBW 2021 SP BLUEs	0.00061413	Not significant after Bonferroni correction
4B_572128780	4B	572128780	Zinc EYTBW 2021 SP Rep 2	0.00068602	Not significant after Bonferroni correction
4B_618683087	4B	618683087	Zinc EYTBW 2021 SP Rep 2	0.00098918	Not significant after Bonferroni correction
4B_620123495	4B	620123495	Zinc EYTBW 2021 SP BLUEs	0.00019124	Not significant after Bonferroni correction
4B_624043751	4B	624043751	Zinc EYTBW 2021 B2IR Rep 2	0.00031007	Not significant after Bonferroni correction
4B_624043751	4B	624043751	Zinc EYTBW 2021 B2IR BLUEs	0.00089597	Not significant after Bonferroni correction
4B_625376928	4B	625376928	Zinc EYTBW 2021 all environments BLUEs	0.00041537	Not significant after Bonferroni correction
4B_648759658	4B	648759658	Iron EYTBW 2021 all environments BLUEs	0.00019593	Not significant after Bonferroni correction
4B_651774345	4B	651774345	Zinc EYTBW 2021 SP Rep 2	0.00029095	Not significant after Bonferroni correction
4B_660591179	4B	660591179	Iron EYTBW 2021 B5IR Rep 1	0.00063441	Not significant after Bonferroni correction
4B_663102729	4B	663102729	Zinc EYTBW 2021 B5IR Rep 1	4.9012e-05	Not significant after Bonferroni correction
4B_663102729	4B	663102729	Iron EYTBW 2021 B5IR Rep 1	0.0001337	Not significant after Bonferroni correction
4B_663443594	4B	663443594	Zinc EYTBW 2021 B5IR BLUEs	0.00083595	Not significant after Bonferroni correction
4B_664650387	4B	664650387	Iron EYTBW 2021 B2IR Rep 1	0.00038388	Not significant after Bonferroni correction
4B_665552172	4B	665552172	Zinc EYTBW 2021 B5IR Rep 1	8.9486e-05	Not significant after Bonferroni correction
4B_665552172	4B	665552172	Iron EYTBW 2021 B5IR Rep 1	0.0003014	Not significant after Bonferroni correction
4B_665552172	4B	665552172	Iron EYTBW 2021 B5IR BLUEs	0.00092373	Not significant after Bonferroni correction
4B_666785702	4B	666785702	Iron EYTBW 2021 all environments BLUEs	0.00086013	Not significant after Bonferroni correction
4D_1615896	4D	1615896	Zinc EYTZN 2020 B5IR Rep 2	0.00012164	Not significant after Bonferroni correction
4D_137022424	4D	137022424	Zinc EYTBW 2021 B5IR Rep 1	0.00029663	Not significant after Bonferroni correction
4D_165567936	4D	165567936	Zinc combined panel B5IR % check	0.00030254	Not significant after Bonferroni correction
4D_165567936	4D	165567936	Iron combined panel B5IR % check	0.00072033	Not significant after Bonferroni correction
4D_193752034	4D	193752034	Zinc combined panel B5IR % check	0.00047522	Not significant after Bonferroni correction
4D_220375728	4D	220375728	Zinc EYTBW 2021 B5IR Rep 1	0.00051136	Not significant after Bonferroni correction
4D_303849551	4D	303849551	Zinc EYTBW 2021 all environments BLUEs	0.00083409	Not significant after Bonferroni correction
4D_303849551	4D	303849551	Zinc EYTBW 2021 B5IR Rep 1	0.00097505	Not significant after Bonferroni correction
4D_307658807	4D	307658807	Iron EYTBW 2021 all environments BLUEs	0.00095137	Not significant after Bonferroni correction
4D_360914337	4D	360914337	Iron EYTBW 2021 all environments BLUEs	6.31e-05	Not significant after Bonferroni correction
4D_360914337	4D	360914337	Iron EYTBW 2021 B5IR BLUEs	0.00015255	Not significant after Bonferroni correction
4D_360914337	4D	360914337	Iron EYTBW 2021 B5IR Rep 2	0.00087779	Not significant after Bonferroni correction
4D_401082726	4D	401082726	Iron EYTBW 2021 all environments BLUEs	0.00036477	Not significant after Bonferroni correction
4D_419338348	4D	419338348	Zinc combined panel B5IR % check	2.1129e-05	Not significant after Bonferroni correction
4D_438790257	4D	438790257	Zinc combined panel B5IR % check	0.00022979	Not significant after Bonferroni correction
4D_438790257	4D	438790257	Iron combined panel B5IR % check	0.00044183	Not significant after Bonferroni correction
4D_438790257	4D	438790257	Zinc EYTBW 2021 all environments BLUEs	0.00071937	Not significant after Bonferroni correction
4D_455090934	4D	455090934	Zinc combined panel B5IR % check	0.000502	Not significant after Bonferroni correction
4D_502639145	4D	502639145	Iron EYTBW 2021 B2IR Rep 2	0.0002223	Not significant after Bonferroni correction
5A_6960731	5A	6960731	Iron EYTBW 2021 B5IR BLUEs	7.7708e-05	Not significant after Bonferroni correction
5A_6960731	5A	6960731	Iron EYTBW 2021 all environments BLUEs	0.00025065	Not significant after Bonferroni correction
5A_6960731	5A	6960731	Iron EYTBW 2021 B5IR Rep 2	0.00029208	Not significant after Bonferroni correction
5A_8056453	5A	8056453	Iron YTBW 2021 B5IR Rep 2	0.00072528	Not significant after Bonferroni correction
5A_8236707	5A	8236707	Zinc EYTBW 2021 B2IR Rep 1	0.00020935	Not significant after Bonferroni correction
5A_8236707	5A	8236707	Zinc EYTBW 2021 B2IR BLUEs	0.00025744	Not significant after Bonferroni correction
5A_9616613	5A	9616613	Iron EYTBW 2021 SP BLUEs	0.00038759	Not significant after Bonferroni correction
5A_19540764	5A	19540764	Iron EYTZN 2020 B5IR Rep 1	0.00033854	Not significant after Bonferroni correction
5A_32675612	5A	32675612	Zinc EYTBW 2021 B5IR BLUEs	1.8154e-05	Not significant after Bonferroni correction
5A_32675612	5A	32675612	Zinc EYTBW 2021 all environments BLUEs	5.1378e-05	Not significant after Bonferroni correction
5A_68971422	5A	68971422	Iron EYTZN 2020 B5IR Rep 2	0.00067241	Not significant after Bonferroni correction
5A_352860849	5A	352860849	Iron EYTZN 2020 B5IR Rep 3	0.00073301	Not significant after Bonferroni correction
5A_382294123	5A	382294123	Iron YTZN 2019 B5IR Rep 3	0.00045711	Not significant after Bonferroni correction
5A_445286862	5A	445286862	Iron EYTBW 2021 B5IR Rep 2	0.00073325	Not significant after Bonferroni correction
5A_473010043	5A	473010043	Zinc EYTBW 2021 B5IR BLUEs	0.00015192	Not significant after Bonferroni correction
5A_502540495	5A	502540495	Zinc EYTBW 2021 B2IR BLUEs	0.00031678	Not significant after Bonferroni correction
5A_502540495	5A	502540495	Zinc EYTBW 2021 B2IR Rep 1	0.00065613	Not significant after Bonferroni correction
5A_509486026	5A	509486026	Iron EYTBW 2021 B2IR Rep 1	0.00096547	Not significant after Bonferroni correction
5A_510211856	5A	510211856	Zinc EYTZN 2020 B5IR Rep 3	0.00031402	Not significant after Bonferroni correction
5A_510211856	5A	510211856	Iron EYTZN 2020 B5IR Rep 2	0.00065331	Not significant after Bonferroni correction
5A_510211856	5A	510211856	Iron EYTZN 2020 B5IR BLUEs	0.00090542	Not significant after Bonferroni correction
5A_514265955	5A	514265955	Iron PCZN 2021 SP Rep 1	0.00051299	Not significant after Bonferroni correction
5A_539502134	5A	539502134	Iron YTBW 2021 B5IR Rep 2	0.00048783	Not significant after Bonferroni correction
5A_549157188	5A	549157188	Zinc PCZN 2018 SP Rep 1	0.0004771	Not significant after Bonferroni correction
5A_550503810	5A	550503810	Zinc YTBW 2021 B5IR Rep 1	0.00013021	Not significant after Bonferroni correction
5A_561143478	5A	561143478	Zinc YTBW 2020 B5IR Rep 2	0.00038069	Not significant after Bonferroni correction
5A_572407329	5A	572407329	Zinc YTZN 2019 B5IR Rep 2	0.00065296	Not significant after Bonferroni correction
5A_585608055	5A	585608055	Zinc EYTBW 2021 SP Rep 1	2.1209e-05	Not significant after Bonferroni correction
5A_585608055	5A	585608055	Zinc EYTBW 2021 SP BLUEs	7.499e-05	Not significant after Bonferroni correction
5A_585608055	5A	585608055	Zinc EYTBW 2021 all environments BLUEs	0.00014703	Not significant after Bonferroni correction
5A_586599769	5A	586599769	Iron EYTZN 2020 B5IR Rep 3	0.00084478	Not significant after Bonferroni correction
5A_587335271	5A	587335271	Iron EYTZN 2020 B5IR Rep 3	0.00014697	Not significant after Bonferroni correction
5A_590977340	5A	590977340	Iron YTBW 2020 B5IR BLUEs	0.00083808	Not significant after Bonferroni correction
5A_593122629	5A	593122629	Iron YTBW 2020 B5IR Rep 1	0.00036519	Not significant after Bonferroni correction
5A_594079971	5A	594079971	Zinc YTBW 2021 B5IR BLUEs	5.5942e-05	Not significant after Bonferroni correction
5A_596027540	5A	596027540	Iron EYTBW 2021 B2IR Rep 2	0.00095862	Not significant after Bonferroni correction
5A_597750832	5A	597750832	Iron YTBW 2020 B5IR BLUEs	0.00056752	Not significant after Bonferroni correction
5A_607673246	5A	607673246	Iron EYTBW 2021 B2IR BLUEs	0.00010241	Not significant after Bonferroni correction
5A_607673246	5A	607673246	Zinc YTBW 2020 B5IR Rep 2	0.00018965	Not significant after Bonferroni correction
5A_607673246	5A	607673246	Zinc YTBW 2020 B5IR BLUEs	0.0008136	Not significant after Bonferroni correction
5A_607673246	5A	607673246	Iron EYTBW 2021 B2IR Rep 1	0.0009176	Not significant after Bonferroni correction
5A_607673246	5A	607673246	Iron YTBW 2020 B5IR BLUEs	0.00097273	Not significant after Bonferroni correction
5A_608344326	5A	608344326	Iron EYTBW 2021 all environments BLUEs	2.1974e-05	Not significant after Bonferroni correction
5A_608344326	5A	608344326	Zinc YTBW 2020 B5IR Rep 2	3.4902e-05	Not significant after Bonferroni correction
5A_608344326	5A	608344326	Iron EYTBW 2021 B2IR BLUEs	5.4298e-05	Not significant after Bonferroni correction
5A_608344326	5A	608344326	Iron YTBW 2020 B5IR BLUEs	0.0003132	Not significant after Bonferroni correction
5A_608344326	5A	608344326	Iron EYTBW 2021 B2IR Rep 1	0.00035242	Not significant after Bonferroni correction
5A_608344326	5A	608344326	Zinc YTBW 2020 B5IR BLUEs	0.0005309	Not significant after Bonferroni correction
5A_608360107	5A	608360107	Zinc YTBW 2020 B5IR Rep 2	3.2144e-05	Not significant after Bonferroni correction
5A_608360107	5A	608360107	Iron EYTBW 2021 B2IR BLUEs	3.2717e-05	Not significant after Bonferroni correction
5A_608360107	5A	608360107	Iron YTBW 2020 B5IR Rep 1	5.9056e-05	Not significant after Bonferroni correction
5A_608360107	5A	608360107	Iron YTBW 2020 B5IR BLUEs	6.8003e-05	Not significant after Bonferroni correction
5A_608360107	5A	608360107	Zinc YTBW 2020 B5IR BLUEs	0.00013291	Not significant after Bonferroni correction
5A_608360107	5A	608360107	Iron EYTBW 2021 B2IR Rep 1	0.00081278	Not significant after Bonferroni correction
5A_611547165	5A	611547165	Iron YTBW 2020 B5IR BLUEs	7.7099e-05	Not significant after Bonferroni correction
5A_611547165	5A	611547165	Iron YTBW 2020 B5IR Rep 2	0.00068975	Not significant after Bonferroni correction
5A_611568811	5A	611568811	Iron YTBW 2020 B5IR BLUEs	7.8388e-05	Not significant after Bonferroni correction
5A_611568811	5A	611568811	Iron YTBW 2020 B5IR Rep 1	0.00062093	Not significant after Bonferroni correction
5A_611631216	5A	611631216	Iron YTBW 2020 B5IR BLUEs	0.00028345	Not significant after Bonferroni correction
5A_613532774	5A	613532774	Iron YTBW 2020 B5IR BLUEs	0.00051374	Not significant after Bonferroni correction
5A_613532774	5A	613532774	Iron YTBW 2020 B5IR Rep 2	0.0007934	Not significant after Bonferroni correction
5A_618265845	5A	618265845	Zinc YTBW 2020 B5IR Rep 2	4.6314e-05	Not significant after Bonferroni correction
5A_618265845	5A	618265845	Iron EYTBW 2021 B5IR BLUEs	0.00011165	Not significant after Bonferroni correction
5A_618265845	5A	618265845	Iron YTBW 2020 B5IR BLUEs	0.00019114	Not significant after Bonferroni correction
5A_618265845	5A	618265845	Zinc YTBW 2020 B5IR BLUEs	0.00063372	Not significant after Bonferroni correction
5A_618265845	5A	618265845	Iron YTBW 2020 B5IR Rep 1	0.00063535	Not significant after Bonferroni correction
5A_635233376	5A	635233376	Iron EYTZN 2020 B5IR Rep 3	0.00078771	Not significant after Bonferroni correction
5A_644448968	5A	644448968	Zinc YTBW 2021 B5IR Rep 1	0.00071577	Not significant after Bonferroni correction
5A_657992033	5A	657992033	Iron YTBW 2020 B5IR BLUEs	0.0004891	Not significant after Bonferroni correction
5A_666106484	5A	666106484	Iron EYTBW 2021 B5IR Rep 2	0.0003442	Not significant after Bonferroni correction
5A_666106484	5A	666106484	Iron EYTBW 2021 B5IR BLUEs	0.00049252	Not significant after Bonferroni correction
5A_666696192	5A	666696192	Iron EYTBW 2021 B5IR Rep 2	0.00085062	Not significant after Bonferroni correction
5A_671394573	5A	671394573	Iron EYTBW 2021 all environments BLUEs	0.00030083	Not significant after Bonferroni correction
5A_671449176	5A	671449176	Iron EYTBW 2021 all environments BLUEs	0.0003006	Not significant after Bonferroni correction
5A_672448344	5A	672448344	Iron YTBW 2021 B5IR Rep 2	0.00054241	Not significant after Bonferroni correction
5A_678232514	5A	678232514	Zinc PCZN 2018 SP Rep 1	0.00046286	Not significant after Bonferroni correction
5A_684942630	5A	684942630	Iron EYTBW 2021 B2IR BLUEs	6.5641e-05	Not significant after Bonferroni correction
5A_684942630	5A	684942630	Iron EYTBW 2021 B2IR Rep 1	7.3937e-05	Not significant after Bonferroni correction
5A_692488853	5A	692488853	Zinc EYTBW 2021 B2IR BLUEs	0.00082226	Not significant after Bonferroni correction
5A_692488853	5A	692488853	Iron EYTBW 2021 B2IR BLUEs	0.00086842	Not significant after Bonferroni correction
5A_695581531	5A	695581531	Iron EYTBW 2021 B2IR BLUEs	0.00016307	Not significant after Bonferroni correction
5A_695581531	5A	695581531	Iron EYTBW 2021 B2IR Rep 1	0.00069703	Not significant after Bonferroni correction
5B_11477524	5B	11477524	Zinc EYTBW 2021 SP BLUEs	0.00029622	Not significant after Bonferroni correction
5B_28812368	5B	28812368	Iron EYTBW 2021 all environments BLUEs	0.00054605	Not significant after Bonferroni correction
5B_31439705	5B	31439705	Iron EYTBW 2021 all environments BLUEs	0.00040348	Not significant after Bonferroni correction
5B_32478662	5B	32478662	Iron EYTBW 2021 all environments BLUEs	0.00020686	Not significant after Bonferroni correction
5B_35809337	5B	35809337	Iron EYTBW 2021 all environments BLUEs	0.00058867	Not significant after Bonferroni correction
5B_38452816	5B	38452816	Iron EYTBW 2021 all environments BLUEs	0.00011076	Not significant after Bonferroni correction
5B_41097371	5B	41097371	Iron EYTBW 2021 B2IR Rep 2	0.00028945	Not significant after Bonferroni correction
5B_41097371	5B	41097371	Iron EYTBW 2021 all environments BLUEs	0.00039134	Not significant after Bonferroni correction
5B_41097371	5B	41097371	Iron EYTBW 2021 B2IR BLUEs	0.00088425	Not significant after Bonferroni correction
5B_41881849	5B	41881849	Iron EYTBW 2021 B2IR BLUEs	0.0003498	Not significant after Bonferroni correction
5B_42533382	5B	42533382	Iron YTZN 2019 B5IR Rep 1	0.00082487	Not significant after Bonferroni correction
5B_43374715	5B	43374715	Iron EYTBW 2021 B2IR Rep 2	9.0412e-05	Not significant after Bonferroni correction
5B_62154065	5B	62154065	Zinc EYTBW 2021 SP Rep 2	0.00064816	Not significant after Bonferroni correction
5B_78260518	5B	78260518	Iron YTZN 2019 B5IR BLUEs	0.00061853	Not significant after Bonferroni correction
5B_78260589	5B	78260589	Iron YTZN 2019 B5IR BLUEs	0.00059987	Not significant after Bonferroni correction
5B_78260589	5B	78260589	Iron YTZN 2019 B5IR Rep 1	0.00089659	Not significant after Bonferroni correction
5B_78706502	5B	78706502	Iron YTZN 2019 B5IR BLUEs	0.00069171	Not significant after Bonferroni correction
5B_117517157	5B	117517157	Iron EYTZN 2020 B5IR Rep 2	0.00080301	Not significant after Bonferroni correction
5B_121011494	5B	121011494	Iron EYTZN 2020 B5IR BLUEs	0.00088243	Not significant after Bonferroni correction
5B_121133316	5B	121133316	Iron EYTZN 2020 B5IR Rep 2	0.00036944	Not significant after Bonferroni correction
5B_142529045	5B	142529045	Iron EYTZN 2020 B5IR Rep 2	3.3403e-05	Not significant after Bonferroni correction
5B_142529045	5B	142529045	Iron EYTZN 2020 B5IR BLUEs	0.00010336	Not significant after Bonferroni correction
5B_179974019	5B	179974019	Zinc EYTBW 2021 B2IR Rep 2	0.00076203	Not significant after Bonferroni correction
5B_243259384	5B	243259384	Zinc EYTBW 2021 SP Rep 1	0.0002317	Not significant after Bonferroni correction
5B_258670753	5B	258670753	Zinc EYTZN 2020 B5IR BLUEs	0.0002609	Not significant after Bonferroni correction
5B_316011853	5B	316011853	Zinc YTZN 2019 B5IR BLUEs	0.00034168	Not significant after Bonferroni correction
5B_316011853	5B	316011853	Zinc YTZN 2019 B5IR Rep 1	0.00067991	Not significant after Bonferroni correction
5B_330218437	5B	330218437	Zinc EYTBW 2021 B2IR BLUEs	0.00091274	Not significant after Bonferroni correction
5B_397682312	5B	397682312	Zinc EYTBW 2021 all environments BLUEs	0.00093574	Not significant after Bonferroni correction
5B_408227862	5B	408227862	Zinc EYTBW 2021 B5IR BLUEs	0.00065058	Not significant after Bonferroni correction
5B_430290844	5B	430290844	Zinc EYTBW 2021 all environments BLUEs	0.00012453	Not significant after Bonferroni correction
5B_430290844	5B	430290844	Zinc EYTBW 2021 SP BLUEs	0.00048894	Not significant after Bonferroni correction
5B_431291651	5B	431291651	Iron combined panel B5IR % check	9.4064e-05	Not significant after Bonferroni correction
5B_436219853	5B	436219853	Iron EYTBW 2021 all environments BLUEs	0.00015528	Not significant after Bonferroni correction
5B_448442202	5B	448442202	Zinc EYTBW 2021 all environments BLUEs	0.00052187	Not significant after Bonferroni correction
5B_487906631	5B	487906631	Zinc EYTBW 2021 SP BLUEs	2.6528e-05	Not significant after Bonferroni correction
5B_487906631	5B	487906631	Zinc EYTBW 2021 SP Rep 2	0.00032157	Not significant after Bonferroni correction
5B_496819737	5B	496819737	Zinc PCZN 2018 SP Rep 1	0.0004088	Not significant after Bonferroni correction
5B_498876732	5B	498876732	Zinc YTBW 2021 B5IR Rep 1	0.00013385	Not significant after Bonferroni correction
5B_506801521	5B	506801521	Zinc EYTBW 2021 B2IR Rep 2	0.00045521	Not significant after Bonferroni correction
5B_507815500	5B	507815500	Zinc YTZN 2020 B5IR Rep 1	0.00089433	Not significant after Bonferroni correction
5B_517584743	5B	517584743	Zinc EYTBW 2021 B2IR Rep 2	0.00093144	Not significant after Bonferroni correction
5B_526607407	5B	526607407	Zinc EYTBW 2021 B2IR Rep 2	0.00042846	Not significant after Bonferroni correction
5B_526607407	5B	526607407	Zinc EYTBW 2021 B2IR BLUEs	0.00090003	Not significant after Bonferroni correction
5B_530914522	5B	530914522	Iron EYTBW 2021 B5IR Rep 1	0.00054239	Not significant after Bonferroni correction
5B_538548049	5B	538548049	Iron EYTBW 2021 B2IR BLUEs	0.00031755	Not significant after Bonferroni correction
5B_538705987	5B	538705987	Zinc YTBW 2020 B5IR Rep 2	0.00043211	Not significant after Bonferroni correction
5B_546132836	5B	546132836	Zinc EYTBW 2021 SP Rep 2	0.00092022	Not significant after Bonferroni correction
5B_551671290	5B	551671290	Iron EYTBW 2021 B5IR BLUEs	9.2917e-05	Not significant after Bonferroni correction
5B_551804209	5B	551804209	Iron EYTBW 2021 B5IR BLUEs	0.00051703	Not significant after Bonferroni correction
5B_553696471	5B	553696471	Zinc EYTZN 2021 B5IR Rep 2	0.00031498	Not significant after Bonferroni correction
5B_559689190	5B	559689190	Iron EYTBW 2021 SP Rep 2	0.00083975	Not significant after Bonferroni correction
5B_559689190	5B	559689190	Iron YTBW 2020 B5IR BLUEs	0.00085516	Not significant after Bonferroni correction
5B_559726088	5B	559726088	Zinc EYTBW 2021 B5IR BLUEs	0.00032008	Not significant after Bonferroni correction
5B_559726088	5B	559726088	Zinc EYTBW 2021 all environments BLUEs	0.0003357	Not significant after Bonferroni correction
5B_559726088	5B	559726088	Iron EYTBW 2021 B5IR BLUEs	0.00043318	Not significant after Bonferroni correction
5B_559726088	5B	559726088	Zinc EYTBW 2021 SP BLUEs	0.00073053	Not significant after Bonferroni correction
5B_559726088	5B	559726088	Zinc EYTBW 2021 B5IR Rep 1	0.00099926	Not significant after Bonferroni correction
5B_561296413	5B	561296413	Zinc EYTZN 2021 B5IR Rep 2	0.00031102	Not significant after Bonferroni correction
5B_561296413	5B	561296413	Zinc EYTZN 2021 B5IR BLUEs	0.00089428	Not significant after Bonferroni correction
5B_561981647	5B	561981647	Zinc EYTBW 2021 SP BLUEs	0.00047224	Not significant after Bonferroni correction
5B_571213548	5B	571213548	Iron YTZN 2021 B5IR BLUEs	0.00076045	Not significant after Bonferroni correction
5B_571635082	5B	571635082	Zinc EYTBW 2021 SP Rep 1	0.00036363	Not significant after Bonferroni correction
5B_571635082	5B	571635082	Zinc EYTBW 2021 SP Rep 2	0.00037857	Not significant after Bonferroni correction
5B_580847795	5B	580847795	Zinc YTBW 2021 B5IR BLUEs	5.8113e-05	Not significant after Bonferroni correction
5B_580847795	5B	580847795	Zinc YTBW 2021 B5IR Rep 1	0.00013486	Not significant after Bonferroni correction
5B_582830486	5B	582830486	Zinc EYTBW 2021 SP BLUEs	0.00050409	Not significant after Bonferroni correction
5B_582974222	5B	582974222	Zinc EYTBW 2021 SP Rep 2	0.00011791	Not significant after Bonferroni correction
5B_582974222	5B	582974222	Zinc EYTBW 2021 SP BLUEs	0.00029099	Not significant after Bonferroni correction
5B_583910468	5B	583910468	Iron YTBW 2021 B5IR Rep 1	0.00044112	Not significant after Bonferroni correction
5B_583910468	5B	583910468	Zinc EYTBW 2021 SP BLUEs	0.00056529	Not significant after Bonferroni correction
5B_586610468	5B	586610468	Zinc YTBW 2021 B5IR Rep 1	0.00010246	Not significant after Bonferroni correction
5B_586610468	5B	586610468	Zinc EYTBW 2021 SP Rep 1	0.0001192	Not significant after Bonferroni correction
5B_586610468	5B	586610468	Zinc EYTBW 2021 SP BLUEs	0.00029392	Not significant after Bonferroni correction
5B_586715328	5B	586715328	Zinc EYTBW 2021 SP BLUEs	0.00016407	Not significant after Bonferroni correction
5B_586715328	5B	586715328	Zinc EYTBW 2021 SP Rep 1	0.00035272	Not significant after Bonferroni correction
5B_586715328	5B	586715328	Iron EYTBW 2021 B5IR BLUEs	0.00074829	Not significant after Bonferroni correction
5B_586715328	5B	586715328	Iron EYTBW 2021 all environments BLUEs	0.00093189	Not significant after Bonferroni correction
5B_592792409	5B	592792409	Zinc YTZN 2021 B5IR Rep 1	0.00034934	Not significant after Bonferroni correction
5B_592792409	5B	592792409	Zinc EYTBW 2021 SP Rep 1	0.00074033	Not significant after Bonferroni correction
5B_592792409	5B	592792409	Zinc EYTBW 2021 SP BLUEs	0.00078198	Not significant after Bonferroni correction
5B_597098833	5B	597098833	Iron EYTBW 2021 B5IR Rep 2	0.0003828	Not significant after Bonferroni correction
5B_600131111	5B	600131111	Iron EYTBW 2021 B5IR BLUEs	0.0003326	Not significant after Bonferroni correction
5B_600131111	5B	600131111	Iron EYTBW 2021 B5IR Rep 2	0.00034547	Not significant after Bonferroni correction
5B_603693542	5B	603693542	Iron YTZN 2019 B5IR Rep 1	0.00038828	Not significant after Bonferroni correction
5B_606300129	5B	606300129	Iron EYTBW 2021 B5IR BLUEs	0.00072652	Not significant after Bonferroni correction
5B_606300129	5B	606300129	Iron EYTBW 2021 all environments BLUEs	0.00073189	Not significant after Bonferroni correction
5B_606483457	5B	606483457	Iron EYTBW 2021 B5IR BLUEs	0.00052524	Not significant after Bonferroni correction
5B_607020013	5B	607020013	Zinc EYTZN 2020 B5IR Rep 1	6.4587e-05	Not significant after Bonferroni correction
5B_607020013	5B	607020013	Zinc EYTZN 2020 B5IR BLUEs	0.00083006	Not significant after Bonferroni correction
5B_607078264	5B	607078264	Iron EYTBW 2021 B5IR BLUEs	0.00093822	Not significant after Bonferroni correction
5B_641174734	5B	641174734	Iron YTBW 2020 B5IR Rep 2	0.0009177	Not significant after Bonferroni correction
5B_641429288	5B	641429288	Iron YTZN 2019 B5IR Rep 2	0.00066059	Not significant after Bonferroni correction
5B_656840762	5B	656840762	Iron EYTBW 2021 B5IR Rep 2	0.00020539	Not significant after Bonferroni correction
5B_656840762	5B	656840762	Iron EYTBW 2021 all environments BLUEs	0.00035387	Not significant after Bonferroni correction
5B_657411790	5B	657411790	Zinc YTZN 2021 B5IR Rep 2	0.00072094	Not significant after Bonferroni correction
5B_679746034	5B	679746034	Iron EYTBW 2021 B2IR Rep 1	1.6714e-05	Not significant after Bonferroni correction
5B_681078405	5B	681078405	Iron EYTBW 2021 B2IR Rep 1	0.00094341	Not significant after Bonferroni correction
5B_692844406	5B	692844406	Zinc EYTBW 2021 B2IR Rep 1	0.00018551	Not significant after Bonferroni correction
5B_692844406	5B	692844406	Zinc EYTBW 2021 B2IR BLUEs	0.00082491	Not significant after Bonferroni correction
5B_693674579	5B	693674579	Iron YTBW 2020 B5IR Rep 1	0.00094124	Not significant after Bonferroni correction
5B_700036644	5B	700036644	Zinc EYTBW 2021 B2IR Rep 1	0.00026769	Not significant after Bonferroni correction
5B_700036644	5B	700036644	Zinc EYTBW 2021 B2IR BLUEs	0.00069494	Not significant after Bonferroni correction
5B_700373009	5B	700373009	Zinc YTZN 2019 B5IR Rep 1	0.00082919	Not significant after Bonferroni correction
5B_701589375	5B	701589375	Iron EYTBW 2021 B2IR BLUEs	0.0006328	Not significant after Bonferroni correction
5B_703899801	5B	703899801	Iron YTZN 2019 B5IR Rep 2	0.00088	Not significant after Bonferroni correction
5B_712940770	5B	712940770	Zinc YTBW 2020 B5IR Rep 2	0.00030265	Not significant after Bonferroni correction
5B_712940770	5B	712940770	Zinc EYTZN 2020 B5IR Rep 3	0.00060808	Not significant after Bonferroni correction
5D_251953310	5D	251953310	Iron YTBW 2020 B5IR Rep 2	0.00049496	Not significant after Bonferroni correction
5D_251953310	5D	251953310	Iron YTBW 2020 B5IR BLUEs	0.00078549	Not significant after Bonferroni correction
5D_385132035	5D	385132035	Zinc YTBW 2020 B5IR BLUEs	0.00012627	Not significant after Bonferroni correction
5D_385132035	5D	385132035	Zinc YTBW 2020 B5IR Rep 2	0.00043886	Not significant after Bonferroni correction
5D_385132035	5D	385132035	Zinc YTBW 2020 B5IR Rep 1	0.0006618	Not significant after Bonferroni correction
5D_432445476	5D	432445476	Iron EYTZN 2021 B5IR BLUEs	0.00014032	Not significant after Bonferroni correction
5D_432445476	5D	432445476	Iron EYTZN 2021 B5IR Rep 2	0.00095424	Not significant after Bonferroni correction
5D_433017840	5D	433017840	Iron EYTZN 2021 B5IR BLUEs	3.4614e-05	Not significant after Bonferroni correction
5D_433017840	5D	433017840	Iron EYTZN 2021 B5IR Rep 1	0.00048348	Not significant after Bonferroni correction
5D_433017840	5D	433017840	Iron EYTZN 2021 B5IR Rep 2	0.00079356	Not significant after Bonferroni correction
5D_465364040	5D	465364040	Zinc YTBW 2021 B5IR BLUEs	0.00086305	Not significant after Bonferroni correction
5D_524041435	5D	524041435	Zinc PCZN 2018 SP Rep 1	0.00081383	Not significant after Bonferroni correction
5D_542412000	5D	542412000	Iron YTZN 2020 B5IR Rep 2	0.00012926	Not significant after Bonferroni correction
6A_926724	6A	926724	Zinc EYTBW 2021 B2IR Rep 1	0.00092582	Not significant after Bonferroni correction
6A_2408343	6A	2408343	Zinc PCZN 2018 SP Rep 1	0.00010467	Not significant after Bonferroni correction
6A_3015745	6A	3015745	Zinc PCZN 2018 SP Rep 1	0.00047293	Not significant after Bonferroni correction
6A_7992090	6A	7992090	Zinc EYTBW 2021 B2IR Rep 1	0.00070556	Not significant after Bonferroni correction
6A_19310412	6A	19310412	Iron EYTBW 2021 B2IR Rep 1	0.00044144	Not significant after Bonferroni correction
6A_19470640	6A	19470640	Zinc YTZN 2020 B5IR Rep 2	0.00089839	Not significant after Bonferroni correction
6A_23815289	6A	23815289	Iron EYTBW 2021 all environments BLUEs	0.00021016	Not significant after Bonferroni correction
6A_23959761	6A	23959761	Iron YTBW 2020 B5IR Rep 1	0.00023935	Not significant after Bonferroni correction
6A_49151548	6A	49151548	Iron EYTZN 2020 B5IR BLUEs	0.00075207	Not significant after Bonferroni correction
6A_49768776	6A	49768776	Iron PCZN 2021 SP Rep 1	0.00033337	Not significant after Bonferroni correction
6A_53159132	6A	53159132	Iron EYTBW 2021 all environments BLUEs	0.00014756	Not significant after Bonferroni correction
6A_61080142	6A	61080142	Iron EYTBW 2021 B5IR Rep 1	0.00035167	Not significant after Bonferroni correction
6A_61080142	6A	61080142	Iron YTZN 2020 B5IR Rep 2	0.00041583	Not significant after Bonferroni correction
6A_61080142	6A	61080142	Iron EYTBW 2021 B5IR BLUEs	0.00058709	Not significant after Bonferroni correction
6A_61212031	6A	61212031	Iron EYTBW 2021 B5IR Rep 1	0.00098556	Not significant after Bonferroni correction
6A_63109075	6A	63109075	Iron EYTBW 2021 B5IR Rep 1	0.0001536	Not significant after Bonferroni correction
6A_63109075	6A	63109075	Iron EYTBW 2021 B5IR BLUEs	0.00083247	Not significant after Bonferroni correction
6A_71546814	6A	71546814	Iron EYTZN 2020 B5IR Rep 2	0.00075012	Not significant after Bonferroni correction
6A_74106770	6A	74106770	Iron YTZN 2019 B5IR Rep 1	0.00012976	Not significant after Bonferroni correction
6A_74106770	6A	74106770	Iron combined panel B5IR % check	0.00055556	Not significant after Bonferroni correction
6A_76625816	6A	76625816	Iron combined panel B5IR % check	4.4495e-05	Not significant after Bonferroni correction
6A_76666619	6A	76666619	Iron YTZN 2020 B5IR Rep 1	0.00095057	Not significant after Bonferroni correction
6A_76758222	6A	76758222	Iron YTZN 2020 B5IR BLUEs	0.00072	Not significant after Bonferroni correction
6A_76758376	6A	76758376	Iron YTBW 2021 B5IR Rep 1	5.1262e-05	Not significant after Bonferroni correction
6A_76758376	6A	76758376	Iron combined panel B5IR % check	0.00076657	Not significant after Bonferroni correction
6A_76926356	6A	76926356	Iron combined panel B5IR % check	0.00051103	Not significant after Bonferroni correction
6A_77083118	6A	77083118	Iron YTBW 2021 B5IR Rep 1	0.00079396	Not significant after Bonferroni correction
6A_77083118	6A	77083118	Iron combined panel B5IR % check	0.00083344	Not significant after Bonferroni correction
6A_109489944	6A	109489944	Iron YTBW 2020 B5IR Rep 1	0.00056425	Not significant after Bonferroni correction
6A_114457003	6A	114457003	Iron EYTBW 2021 B2IR Rep 1	4.7195e-05	Not significant after Bonferroni correction
6A_229288890	6A	229288890	Iron EYTZN 2020 B5IR Rep 2	0.00040953	Not significant after Bonferroni correction
6A_327487187	6A	327487187	Zinc EYTBW 2021 SP Rep 1	0.00071058	Not significant after Bonferroni correction
6A_417637725	6A	417637725	Iron YTBW 2020 B5IR BLUEs	0.00099707	Not significant after Bonferroni correction
6A_431196234	6A	431196234	Iron YTZN 2020 B5IR Rep 2	0.00045632	Not significant after Bonferroni correction
6A_497684885	6A	497684885	Zinc YTZN 2019 B5IR Rep 2	0.00031071	Not significant after Bonferroni correction
6A_497684885	6A	497684885	Zinc YTZN 2019 B5IR BLUEs	0.0006819	Not significant after Bonferroni correction
6A_556967794	6A	556967794	Zinc EYTBW 2021 B2IR Rep 2	0.00058581	Not significant after Bonferroni correction
6A_577020054	6A	577020054	Zinc EYTBW 2021 B2IR BLUEs	2.1326e-05	Not significant after Bonferroni correction
6A_597849089	6A	597849089	Iron EYTBW 2021 B5IR Rep 1	0.00015546	Not significant after Bonferroni correction
6A_599982368	6A	599982368	Iron combined panel B5IR % check	0.00051738	Not significant after Bonferroni correction
6A_601874040	6A	601874040	Iron EYTBW 2021 B2IR BLUEs	0.00059901	Not significant after Bonferroni correction
6A_608662054	6A	608662054	Iron YTZN 2020 B5IR Rep 3	0.00086074	Not significant after Bonferroni correction
6A_611557056	6A	611557056	Iron YTZN 2019 B5IR Rep 2	0.00028702	Not significant after Bonferroni correction
6A_617838589	6A	617838589	Iron YTZN 2019 B5IR Rep 2	0.00090335	Not significant after Bonferroni correction
6B_1960302	6B	1960302	Iron EYTBW 2021 SP Rep 1	0.00070695	Not significant after Bonferroni correction
6B_1960302	6B	1960302	Iron EYTBW 2021 SP BLUEs	0.00080504	Not significant after Bonferroni correction
6B_22270033	6B	22270033	Iron EYTBW 2021 B5IR Rep 2	0.00077497	Not significant after Bonferroni correction
6B_27582225	6B	27582225	Iron EYTBW 2021 B2IR Rep 2	0.00048136	Not significant after Bonferroni correction
6B_31876019	6B	31876019	Zinc EYTBW 2021 B5IR BLUEs	8.1901e-05	Not significant after Bonferroni correction
6B_32582643	6B	32582643	Zinc combined panel B5IR % check	0.00046154	Not significant after Bonferroni correction
6B_34340633	6B	34340633	Zinc combined panel B5IR % check	0.00066964	Not significant after Bonferroni correction
6B_34687372	6B	34687372	Zinc YTBW 2021 B5IR Rep 1	0.00033804	Not significant after Bonferroni correction
6B_38084613	6B	38084613	Zinc combined panel B5IR % check	0.00035529	Not significant after Bonferroni correction
6B_39197234	6B	39197234	Zinc combined panel B5IR % check	0.00062848	Not significant after Bonferroni correction
6B_39809253	6B	39809253	Zinc combined panel B5IR % check	0.00030255	Not significant after Bonferroni correction
6B_41706860	6B	41706860	Iron EYTBW 2021 B5IR BLUEs	0.00032449	Not significant after Bonferroni correction
6B_46396665	6B	46396665	Iron EYTBW 2021 B5IR Rep 1	0.00060593	Not significant after Bonferroni correction
6B_86672498	6B	86672498	Zinc EYTBW 2021 all environments BLUEs	0.00038203	Not significant after Bonferroni correction
6B_92231426	6B	92231426	Iron EYTBW 2021 B5IR Rep 1	6.4648e-05	Not significant after Bonferroni correction
6B_95496543	6B	95496543	Zinc EYTZN 2020 B5IR Rep 1	0.0008754	Not significant after Bonferroni correction
6B_121634545	6B	121634545	Zinc EYTBW 2021 B2IR Rep 1	0.00012098	Not significant after Bonferroni correction
6B_123209658	6B	123209658	Zinc EYTBW 2021 all environments BLUEs	0.00060925	Not significant after Bonferroni correction
6B_124647441	6B	124647441	Zinc EYTBW 2021 B2IR Rep 1	4.3954e-05	Not significant after Bonferroni correction
6B_124647441	6B	124647441	Zinc EYTBW 2021 B2IR BLUEs	0.00020144	Not significant after Bonferroni correction
6B_125036896	6B	125036896	Zinc EYTBW 2021 B2IR Rep 1	8.6713e-05	Not significant after Bonferroni correction
6B_125036896	6B	125036896	Zinc EYTBW 2021 B2IR BLUEs	0.00065927	Not significant after Bonferroni correction
6B_125052046	6B	125052046	Zinc EYTBW 2021 SP Rep 2	0.0004961	Not significant after Bonferroni correction
6B_126135062	6B	126135062	Zinc EYTBW 2021 B2IR Rep 1	0.00029347	Not significant after Bonferroni correction
6B_126135062	6B	126135062	Zinc EYTBW 2021 B2IR BLUEs	0.00072535	Not significant after Bonferroni correction
6B_128091270	6B	128091270	Zinc EYTBW 2021 B2IR Rep 1	0.00012544	Not significant after Bonferroni correction
6B_128193504	6B	128193504	Zinc EYTBW 2021 B2IR Rep 1	0.00041308	Not significant after Bonferroni correction
6B_128193504	6B	128193504	Zinc EYTBW 2021 B2IR BLUEs	0.00058575	Not significant after Bonferroni correction
6B_128491804	6B	128491804	Zinc EYTBW 2021 B2IR Rep 1	4.2658e-05	Not significant after Bonferroni correction
6B_128491804	6B	128491804	Zinc EYTBW 2021 B2IR BLUEs	0.00039664	Not significant after Bonferroni correction
6B_129478574	6B	129478574	Zinc EYTBW 2021 B2IR BLUEs	0.00010918	Not significant after Bonferroni correction
6B_129515294	6B	129515294	Zinc EYTBW 2021 B2IR Rep 1	0.00034196	Not significant after Bonferroni correction
6B_129856460	6B	129856460	Zinc EYTBW 2021 B2IR Rep 1	8.7771e-05	Not significant after Bonferroni correction
6B_147013096	6B	147013096	Zinc EYTBW 2021 B2IR Rep 1	5.2983e-05	Not significant after Bonferroni correction
6B_147013096	6B	147013096	Zinc EYTBW 2021 B2IR BLUEs	0.00068031	Not significant after Bonferroni correction
6B_151415082	6B	151415082	Zinc EYTBW 2021 all environments BLUEs	0.00024576	Not significant after Bonferroni correction
6B_151415082	6B	151415082	Zinc EYTBW 2021 B2IR BLUEs	0.00062526	Not significant after Bonferroni correction
6B_151894189	6B	151894189	Zinc EYTBW 2021 B2IR Rep 1	0.00091569	Not significant after Bonferroni correction
6B_151952859	6B	151952859	Zinc EYTBW 2021 B2IR BLUEs	0.00055075	Not significant after Bonferroni correction
6B_151952859	6B	151952859	Zinc EYTBW 2021 B2IR Rep 1	0.00088479	Not significant after Bonferroni correction
6B_153400506	6B	153400506	Zinc EYTBW 2021 B2IR Rep 1	0.00033119	Not significant after Bonferroni correction
6B_153532546	6B	153532546	Zinc EYTBW 2021 B2IR Rep 1	0.00023989	Not significant after Bonferroni correction
6B_153561917	6B	153561917	Zinc EYTBW 2021 B2IR BLUEs	0.00018862	Not significant after Bonferroni correction
6B_153561917	6B	153561917	Zinc EYTBW 2021 all environments BLUEs	0.00053052	Not significant after Bonferroni correction
6B_153561917	6B	153561917	Zinc EYTBW 2021 B2IR Rep 1	0.00055466	Not significant after Bonferroni correction
6B_157948354	6B	157948354	Zinc EYTBW 2021 all environments BLUEs	0.00013143	Not significant after Bonferroni correction
6B_158998340	6B	158998340	Zinc EYTBW 2021 all environments BLUEs	0.00049325	Not significant after Bonferroni correction
6B_158998340	6B	158998340	Zinc EYTBW 2021 SP Rep 2	0.00060611	Not significant after Bonferroni correction
6B_159380442	6B	159380442	Zinc EYTBW 2021 B5IR Rep 2	0.00095431	Not significant after Bonferroni correction
6B_172366330	6B	172366330	Zinc EYTBW 2021 all environments BLUEs	0.00012403	Not significant after Bonferroni correction
6B_172366330	6B	172366330	Zinc EYTBW 2021 B2IR Rep 1	0.00032567	Not significant after Bonferroni correction
6B_172366330	6B	172366330	Zinc EYTBW 2021 B2IR BLUEs	0.00034027	Not significant after Bonferroni correction
6B_173653415	6B	173653415	Zinc EYTBW 2021 all environments BLUEs	2.686e-05	Not significant after Bonferroni correction
6B_173653415	6B	173653415	Zinc EYTBW 2021 B2IR BLUEs	0.00016167	Not significant after Bonferroni correction
6B_173653415	6B	173653415	Zinc EYTBW 2021 B2IR Rep 1	0.00019189	Not significant after Bonferroni correction
6B_174550372	6B	174550372	Zinc EYTBW 2021 all environments BLUEs	0.00014512	Not significant after Bonferroni correction
6B_174550372	6B	174550372	Zinc EYTBW 2021 B2IR Rep 1	0.00028629	Not significant after Bonferroni correction
6B_174550372	6B	174550372	Zinc EYTBW 2021 B2IR BLUEs	0.00037735	Not significant after Bonferroni correction
6B_182643926	6B	182643926	Zinc EYTBW 2021 B2IR Rep 1	0.00011026	Not significant after Bonferroni correction
6B_182734179	6B	182734179	Zinc EYTBW 2021 all environments BLUEs	0.00057291	Not significant after Bonferroni correction
6B_182735343	6B	182735343	Zinc EYTBW 2021 all environments BLUEs	0.00059064	Not significant after Bonferroni correction
6B_182735343	6B	182735343	Zinc EYTBW 2021 B2IR Rep 1	0.0007102	Not significant after Bonferroni correction
6B_183278474	6B	183278474	Zinc EYTBW 2021 SP Rep 2	0.00029844	Not significant after Bonferroni correction
6B_183278474	6B	183278474	Zinc EYTBW 2021 all environments BLUEs	0.0004847	Not significant after Bonferroni correction
6B_183278496	6B	183278496	Zinc EYTBW 2021 B2IR BLUEs	5.2589e-05	Not significant after Bonferroni correction
6B_183278496	6B	183278496	Zinc EYTBW 2021 B2IR Rep 1	7.0774e-05	Not significant after Bonferroni correction
6B_183278496	6B	183278496	Zinc EYTBW 2021 B5IR BLUEs	0.00086741	Not significant after Bonferroni correction
6B_183294693	6B	183294693	Zinc EYTBW 2021 B2IR Rep 1	0.00094652	Not significant after Bonferroni correction
6B_183351745	6B	183351745	Zinc EYTBW 2021 B2IR Rep 1	0.00089583	Not significant after Bonferroni correction
6B_185568824	6B	185568824	Zinc EYTBW 2021 all environments BLUEs	0.00017807	Not significant after Bonferroni correction
6B_185568824	6B	185568824	Zinc EYTBW 2021 B5IR Rep 1	0.00093811	Not significant after Bonferroni correction
6B_188684286	6B	188684286	Zinc EYTBW 2021 B2IR BLUEs	7.3365e-05	Not significant after Bonferroni correction
6B_188684286	6B	188684286	Zinc EYTBW 2021 B2IR Rep 1	0.00033295	Not significant after Bonferroni correction
6B_188684286	6B	188684286	Zinc EYTBW 2021 B5IR Rep 1	0.00081415	Not significant after Bonferroni correction
6B_191252216	6B	191252216	Zinc EYTBW 2021 all environments BLUEs	0.00061639	Not significant after Bonferroni correction
6B_193334002	6B	193334002	Zinc EYTBW 2021 B2IR BLUEs	9.8623e-05	Not significant after Bonferroni correction
6B_193334002	6B	193334002	Zinc EYTBW 2021 B5IR Rep 1	0.00013373	Not significant after Bonferroni correction
6B_193334002	6B	193334002	Zinc EYTBW 2021 B2IR Rep 1	0.00022709	Not significant after Bonferroni correction
6B_193334002	6B	193334002	Zinc EYTBW 2021 B5IR BLUEs	0.00030677	Not significant after Bonferroni correction
6B_197761436	6B	197761436	Zinc EYTBW 2021 B2IR Rep 1	0.00069282	Not significant after Bonferroni correction
6B_204602976	6B	204602976	Zinc EYTBW 2021 B5IR BLUEs	0.00011904	Not significant after Bonferroni correction
6B_204602976	6B	204602976	Zinc EYTBW 2021 B2IR BLUEs	0.00028421	Not significant after Bonferroni correction
6B_204602976	6B	204602976	Zinc EYTBW 2021 B5IR Rep 1	0.00036202	Not significant after Bonferroni correction
6B_204602976	6B	204602976	Zinc EYTBW 2021 B2IR Rep 1	0.0006302	Not significant after Bonferroni correction
6B_207962829	6B	207962829	Zinc EYTBW 2021 B2IR Rep 1	0.00036415	Not significant after Bonferroni correction
6B_209953112	6B	209953112	Zinc EYTBW 2021 B2IR Rep 1	0.00011956	Not significant after Bonferroni correction
6B_209953112	6B	209953112	Zinc EYTBW 2021 B2IR BLUEs	0.0002922	Not significant after Bonferroni correction
6B_209953112	6B	209953112	Zinc EYTBW 2021 B5IR Rep 1	0.0004045	Not significant after Bonferroni correction
6B_209953112	6B	209953112	Zinc EYTBW 2021 all environments BLUEs	0.00052509	Not significant after Bonferroni correction
6B_213227721	6B	213227721	Zinc EYTBW 2021 SP Rep 2	0.00030924	Not significant after Bonferroni correction
6B_226747335	6B	226747335	Zinc EYTBW 2021 B2IR BLUEs	2.2828e-05	Not significant after Bonferroni correction
6B_226747335	6B	226747335	Zinc EYTBW 2021 all environments BLUEs	0.00098157	Not significant after Bonferroni correction
6B_229054447	6B	229054447	Zinc EYTBW 2021 all environments BLUEs	2.7557e-05	Not significant after Bonferroni correction
6B_229054447	6B	229054447	Zinc EYTBW 2021 B2IR BLUEs	0.00047148	Not significant after Bonferroni correction
6B_229054447	6B	229054447	Zinc EYTBW 2021 B5IR Rep 1	0.00049762	Not significant after Bonferroni correction
6B_229054447	6B	229054447	Zinc EYTBW 2021 B2IR Rep 1	0.0007931	Not significant after Bonferroni correction
6B_229054447	6B	229054447	Zinc EYTBW 2021 B5IR BLUEs	0.00099284	Not significant after Bonferroni correction
6B_229054471	6B	229054471	Iron YTBW 2020 B5IR BLUEs	4.4105e-05	Not significant after Bonferroni correction
6B_229054471	6B	229054471	Iron YTBW 2020 B5IR Rep 2	0.00033393	Not significant after Bonferroni correction
6B_233122036	6B	233122036	Zinc EYTBW 2021 B5IR Rep 1	0.00085363	Not significant after Bonferroni correction
6B_234107241	6B	234107241	Iron YTBW 2021 B5IR BLUEs	0.00080568	Not significant after Bonferroni correction
6B_234687547	6B	234687547	Zinc EYTBW 2021 B2IR Rep 1	0.00042165	Not significant after Bonferroni correction
6B_234687547	6B	234687547	Zinc EYTBW 2021 B5IR Rep 1	0.00050411	Not significant after Bonferroni correction
6B_235778775	6B	235778775	Zinc EYTBW 2021 all environments BLUEs	0.00016979	Not significant after Bonferroni correction
6B_235778775	6B	235778775	Zinc EYTBW 2021 B5IR Rep 1	0.00046713	Not significant after Bonferroni correction
6B_237914579	6B	237914579	Zinc EYTBW 2021 all environments BLUEs	0.00078432	Not significant after Bonferroni correction
6B_237914579	6B	237914579	Zinc EYTBW 2021 B2IR BLUEs	0.0008032	Not significant after Bonferroni correction
6B_237914579	6B	237914579	Zinc EYTBW 2021 B2IR Rep 1	0.00080867	Not significant after Bonferroni correction
6B_237914579	6B	237914579	Zinc EYTBW 2021 B5IR Rep 1	0.00096356	Not significant after Bonferroni correction
6B_245007329	6B	245007329	Zinc EYTBW 2021 B2IR Rep 1	9.5371e-05	Not significant after Bonferroni correction
6B_245007329	6B	245007329	Zinc EYTBW 2021 B2IR BLUEs	0.00081061	Not significant after Bonferroni correction
6B_280373992	6B	280373992	Zinc EYTBW 2021 B5IR BLUEs	0.00042624	Not significant after Bonferroni correction
6B_285305327	6B	285305327	Zinc EYTBW 2021 B5IR BLUEs	0.00034199	Not significant after Bonferroni correction
6B_349734610	6B	349734610	Zinc EYTBW 2021 B5IR Rep 1	0.00073098	Not significant after Bonferroni correction
6B_349734610	6B	349734610	Zinc EYTBW 2021 B5IR BLUEs	0.00088648	Not significant after Bonferroni correction
6B_408033582	6B	408033582	Zinc EYTBW 2021 B2IR BLUEs	7.1677e-05	Not significant after Bonferroni correction
6B_408033582	6B	408033582	Zinc EYTBW 2021 B2IR Rep 1	0.00014793	Not significant after Bonferroni correction
6B_408033582	6B	408033582	Zinc EYTBW 2021 all environments BLUEs	0.00022545	Not significant after Bonferroni correction
6B_413129908	6B	413129908	Zinc YTBW 2020 B5IR Rep 2	4.4508e-05	Not significant after Bonferroni correction
6B_413129908	6B	413129908	Zinc YTBW 2020 B5IR BLUEs	0.00016735	Not significant after Bonferroni correction
6B_441149819	6B	441149819	Iron YTBW 2021 B5IR Rep 2	0.00097081	Not significant after Bonferroni correction
6B_457216458	6B	457216458	Zinc EYTBW 2021 B2IR Rep 1	0.00080732	Not significant after Bonferroni correction
6B_467110683	6B	467110683	Zinc EYTBW 2021 all environments BLUEs	0.00078213	Not significant after Bonferroni correction
6B_469294813	6B	469294813	Zinc EYTBW 2021 all environments BLUEs	0.00015144	Not significant after Bonferroni correction
6B_469294813	6B	469294813	Zinc EYTBW 2021 B2IR BLUEs	0.00031209	Not significant after Bonferroni correction
6B_469706108	6B	469706108	Zinc EYTBW 2021 all environments BLUEs	0.00010078	Not significant after Bonferroni correction
6B_469706108	6B	469706108	Zinc EYTBW 2021 B5IR BLUEs	0.00040602	Not significant after Bonferroni correction
6B_469949181	6B	469949181	Zinc EYTBW 2021 all environments BLUEs	0.00078497	Not significant after Bonferroni correction
6B_470990355	6B	470990355	Zinc EYTBW 2021 all environments BLUEs	0.00065782	Not significant after Bonferroni correction
6B_471154484	6B	471154484	Zinc EYTBW 2021 B2IR Rep 1	0.00026589	Not significant after Bonferroni correction
6B_471154484	6B	471154484	Zinc EYTBW 2021 all environments BLUEs	0.0002832	Not significant after Bonferroni correction
6B_471154484	6B	471154484	Zinc EYTBW 2021 B2IR BLUEs	0.00063589	Not significant after Bonferroni correction
6B_507576953	6B	507576953	Zinc EYTBW 2021 all environments BLUEs	0.00039074	Not significant after Bonferroni correction
6B_507595454	6B	507595454	Zinc EYTBW 2021 all environments BLUEs	0.00092996	Not significant after Bonferroni correction
6B_537051386	6B	537051386	Zinc EYTBW 2021 B5IR Rep 1	0.00086965	Not significant after Bonferroni correction
6B_612219273	6B	612219273	Zinc YTZN 2021 B5IR Rep 2	0.00067068	Not significant after Bonferroni correction
6B_616437767	6B	616437767	Zinc combined panel B5IR % check	0.00048827	Not significant after Bonferroni correction
6B_624698891	6B	624698891	Zinc EYTBW 2021 all environments BLUEs	0.0003104	Not significant after Bonferroni correction
6B_663671036	6B	663671036	Iron combined panel B5IR % check	0.00084643	Not significant after Bonferroni correction
6B_663750758	6B	663750758	Iron combined panel B5IR % check	0.00076269	Not significant after Bonferroni correction
6B_664228336	6B	664228336	Iron EYTBW 2021 SP BLUEs	0.00022566	Not significant after Bonferroni correction
6B_664542210	6B	664542210	Iron YTZN 2020 B5IR BLUEs	0.0008524	Not significant after Bonferroni correction
6B_664647085	6B	664647085	Iron YTZN 2020 B5IR BLUEs	0.00030281	Not significant after Bonferroni correction
6B_664647085	6B	664647085	Iron YTZN 2020 B5IR Rep 2	0.00059428	Not significant after Bonferroni correction
6B_664647163	6B	664647163	Iron EYTBW 2021 SP BLUEs	0.00069399	Not significant after Bonferroni correction
6B_669333781	6B	669333781	Iron EYTBW 2021 SP BLUEs	0.00021307	Not significant after Bonferroni correction
6B_675246291	6B	675246291	Iron YTZN 2021 B5IR Rep 1	0.00057689	Not significant after Bonferroni correction
6B_677764952	6B	677764952	Iron EYTBW 2021 B2IR Rep 1	0.00038788	Not significant after Bonferroni correction
6B_696237388	6B	696237388	Zinc EYTBW 2021 B2IR Rep 2	0.00012106	Not significant after Bonferroni correction
6B_696237388	6B	696237388	Iron EYTBW 2021 B2IR Rep 2	0.00015219	Not significant after Bonferroni correction
6B_708228208	6B	708228208	Zinc YTZN 2021 B5IR Rep 1	0.00036668	Not significant after Bonferroni correction
6B_712110271	6B	712110271	Zinc EYTBW 2021 B5IR Rep 2	0.00085519	Not significant after Bonferroni correction
6B_714491604	6B	714491604	Iron EYTBW 2021 B5IR Rep 2	6.9746e-05	Not significant after Bonferroni correction
6B_715779968	6B	715779968	Iron YTBW 2020 B5IR Rep 2	4.4487e-05	Not significant after Bonferroni correction
6B_715779968	6B	715779968	Iron YTBW 2020 B5IR BLUEs	0.00026377	Not significant after Bonferroni correction
6B_716604534	6B	716604534	Iron YTZN 2020 B5IR Rep 2	0.00016297	Not significant after Bonferroni correction
6B_719425028	6B	719425028	Iron EYTBW 2021 all environments BLUEs	0.00044213	Not significant after Bonferroni correction
6B_720519123	6B	720519123	Iron YTBW 2020 B5IR BLUEs	0.00035259	Not significant after Bonferroni correction
6B_720519123	6B	720519123	Iron YTBW 2020 B5IR Rep 2	0.00038921	Not significant after Bonferroni correction
6D_2050201	6D	2050201	Iron EYTBW 2021 B5IR BLUEs	0.00069797	Not significant after Bonferroni correction
6D_2050201	6D	2050201	Zinc EYTBW 2021 B5IR BLUEs	0.00094946	Not significant after Bonferroni correction
6D_2282476	6D	2282476	Zinc combined panel B5IR % check	0.0008205	Not significant after Bonferroni correction
6D_2368311	6D	2368311	Iron EYTBW 2021 SP Rep 2	0.00046448	Not significant after Bonferroni correction
6D_2485933	6D	2485933	Zinc YTZN 2019 B5IR Rep 3	0.00083563	Not significant after Bonferroni correction
6D_2920351	6D	2920351	Zinc combined panel B5IR % check	7.0618e-05	Not significant after Bonferroni correction
6D_4726489	6D	4726489	Zinc EYTBW 2021 all environments BLUEs	2.2078e-05	Not significant after Bonferroni correction
6D_4726489	6D	4726489	Zinc EYTBW 2021 B2IR BLUEs	3.4903e-05	Not significant after Bonferroni correction
6D_4726489	6D	4726489	Zinc EYTBW 2021 B2IR Rep 1	0.00048625	Not significant after Bonferroni correction
6D_4726489	6D	4726489	Zinc EYTBW 2021 B2IR Rep 2	0.00070499	Not significant after Bonferroni correction
6D_5945276	6D	5945276	Zinc EYTBW 2021 B2IR BLUEs	4.4395e-05	Not significant after Bonferroni correction
6D_5945276	6D	5945276	Zinc combined panel B5IR % check	0.00023884	Not significant after Bonferroni correction
6D_5945276	6D	5945276	Zinc YTZN 2021 B5IR BLUEs	0.00058818	Not significant after Bonferroni correction
6D_6106319	6D	6106319	Zinc combined panel B5IR % check	0.00039575	Not significant after Bonferroni correction
6D_6232327	6D	6232327	Zinc combined panel B5IR % check	0.00068383	Not significant after Bonferroni correction
6D_6343707	6D	6343707	Zinc EYTBW 2021 B2IR Rep 1	0.0006261	Not significant after Bonferroni correction
6D_7989426	6D	7989426	Iron YTBW 2020 B5IR Rep 1	0.0005435	Not significant after Bonferroni correction
6D_8402608	6D	8402608	Zinc YTBW 2020 B5IR BLUEs	0.00028501	Not significant after Bonferroni correction
6D_8402608	6D	8402608	Zinc YTBW 2020 B5IR Rep 2	0.0004034	Not significant after Bonferroni correction
6D_8662162	6D	8662162	Zinc YTBW 2020 B5IR BLUEs	3.4045e-05	Not significant after Bonferroni correction
6D_8662162	6D	8662162	Zinc YTBW 2020 B5IR Rep 2	8.0153e-05	Not significant after Bonferroni correction
6D_8662162	6D	8662162	Zinc YTBW 2020 B5IR Rep 1	0.00049078	Not significant after Bonferroni correction
6D_8662162	6D	8662162	Iron EYTZN 2020 B5IR Rep 1	0.00084471	Not significant after Bonferroni correction
6D_8758611	6D	8758611	Zinc YTBW 2020 B5IR BLUEs	2.1295e-05	Not significant after Bonferroni correction
6D_8758611	6D	8758611	Zinc YTBW 2020 B5IR Rep 2	2.3804e-05	Not significant after Bonferroni correction
6D_8758611	6D	8758611	Zinc YTBW 2020 B5IR Rep 1	0.0008648	Not significant after Bonferroni correction
6D_8792178	6D	8792178	Zinc YTBW 2020 B5IR BLUEs	0.00066035	Not significant after Bonferroni correction
6D_10071479	6D	10071479	Zinc YTBW 2020 B5IR Rep 2	0.00021205	Not significant after Bonferroni correction
6D_10071479	6D	10071479	Zinc YTBW 2020 B5IR BLUEs	0.00021342	Not significant after Bonferroni correction
6D_12019189	6D	12019189	Zinc YTBW 2020 B5IR Rep 2	0.00062343	Not significant after Bonferroni correction
6D_24576789	6D	24576789	Iron EYTBW 2021 B2IR BLUEs	0.0006197	Not significant after Bonferroni correction
6D_28944411	6D	28944411	Zinc YTBW 2020 B5IR BLUEs	0.00046398	Not significant after Bonferroni correction
6D_28944411	6D	28944411	Zinc YTBW 2020 B5IR Rep 2	0.00086204	Not significant after Bonferroni correction
6D_82630628	6D	82630628	Zinc YTZN 2019 B5IR Rep 3	0.00043237	Not significant after Bonferroni correction
6D_82630628	6D	82630628	Zinc YTZN 2019 B5IR BLUEs	0.00064703	Not significant after Bonferroni correction
6D_91819972	6D	91819972	Iron EYTBW 2021 all environments BLUEs	0.00061053	Not significant after Bonferroni correction
6D_241296319	6D	241296319	Iron YTBW 2021 B5IR Rep 2	0.00011953	Not significant after Bonferroni correction
6D_241296319	6D	241296319	Iron YTBW 2021 B5IR BLUEs	0.00023605	Not significant after Bonferroni correction
6D_302152401	6D	302152401	Iron YTBW 2021 B5IR Rep 2	0.00013027	Not significant after Bonferroni correction
6D_302152401	6D	302152401	Iron YTBW 2021 B5IR BLUEs	0.00014226	Not significant after Bonferroni correction
6D_305272917	6D	305272917	Iron combined panel B5IR % check	0.00022392	Not significant after Bonferroni correction
6D_457270843	6D	457270843	Zinc EYTBW 2021 SP Rep 1	0.00016408	Not significant after Bonferroni correction
6D_463743125	6D	463743125	Iron EYTZN 2021 B5IR Rep 2	0.00056404	Not significant after Bonferroni correction
6D_463743125	6D	463743125	Iron EYTZN 2021 B5IR BLUEs	0.00094011	Not significant after Bonferroni correction
7A_289461	7A	289461	Zinc EYTZN 2020 B5IR BLUEs	0.00088519	Not significant after Bonferroni correction
7A_2974209	7A	2974209	Zinc YTZN 2019 B5IR Rep 2	0.00037898	Not significant after Bonferroni correction
7A_3542320	7A	3542320	Zinc YTBW 2021 B5IR Rep 1	4.8493e-05	Not significant after Bonferroni correction
7A_3578949	7A	3578949	Zinc YTZN 2019 B5IR Rep 2	0.00025415	Not significant after Bonferroni correction
7A_4013326	7A	4013326	Zinc YTZN 2019 B5IR Rep 2	0.00080026	Not significant after Bonferroni correction
7A_4630018	7A	4630018	Zinc YTZN 2019 B5IR Rep 2	0.0005106	Not significant after Bonferroni correction
7A_8289401	7A	8289401	Zinc EYTBW 2021 all environments BLUEs	0.00019523	Not significant after Bonferroni correction
7A_8289401	7A	8289401	Zinc EYTBW 2021 B5IR Rep 1	0.00026388	Not significant after Bonferroni correction
7A_8354993	7A	8354993	Zinc EYTBW 2021 all environments BLUEs	0.00063761	Not significant after Bonferroni correction
7A_8799491	7A	8799491	Zinc EYTBW 2021 all environments BLUEs	0.00087572	Not significant after Bonferroni correction
7A_9756596	7A	9756596	Zinc EYTBW 2021 all environments BLUEs	0.00077299	Not significant after Bonferroni correction
7A_12007575	7A	12007575	Zinc EYTBW 2021 all environments BLUEs	0.00095651	Not significant after Bonferroni correction
7A_16891973	7A	16891973	Iron EYTBW 2021 B2IR Rep 2	0.00054466	Not significant after Bonferroni correction
7A_22716737	7A	22716737	Zinc EYTBW 2021 B5IR Rep 1	0.00070187	Not significant after Bonferroni correction
7A_25860352	7A	25860352	Zinc EYTBW 2021 B5IR Rep 1	0.00013279	Not significant after Bonferroni correction
7A_25860352	7A	25860352	Iron EYTBW 2021 B5IR BLUEs	0.00046941	Not significant after Bonferroni correction
7A_25860352	7A	25860352	Iron EYTBW 2021 B5IR Rep 1	0.00053984	Not significant after Bonferroni correction
7A_34920099	7A	34920099	Zinc YTBW 2021 B5IR Rep 1	0.00084767	Not significant after Bonferroni correction
7A_49159068	7A	49159068	Zinc YTBW 2020 B5IR Rep 2	0.00078168	Not significant after Bonferroni correction
7A_49175278	7A	49175278	Zinc YTBW 2020 B5IR Rep 2	0.00061	Not significant after Bonferroni correction
7A_49175357	7A	49175357	Zinc YTBW 2020 B5IR Rep 2	7.3916e-05	Not significant after Bonferroni correction
7A_49184643	7A	49184643	Zinc YTBW 2020 B5IR Rep 2	2.6277e-05	Not significant after Bonferroni correction
7A_49486782	7A	49486782	Zinc YTBW 2020 B5IR Rep 2	0.00031835	Not significant after Bonferroni correction
7A_49507899	7A	49507899	Zinc YTBW 2020 B5IR Rep 2	0.00018727	Not significant after Bonferroni correction
7A_49560773	7A	49560773	Zinc YTBW 2020 B5IR Rep 2	0.0005901	Not significant after Bonferroni correction
7A_49592884	7A	49592884	Zinc YTBW 2020 B5IR Rep 2	0.00084735	Not significant after Bonferroni correction
7A_49592941	7A	49592941	Zinc YTBW 2020 B5IR Rep 2	7.2219e-05	Not significant after Bonferroni correction
7A_50028886	7A	50028886	Zinc YTBW 2020 B5IR Rep 2	0.00092764	Not significant after Bonferroni correction
7A_56377315	7A	56377315	Zinc EYTBW 2021 B2IR BLUEs	0.00075056	Not significant after Bonferroni correction
7A_56453894	7A	56453894	Zinc YTBW 2020 B5IR Rep 2	0.00068825	Not significant after Bonferroni correction
7A_56911623	7A	56911623	Zinc YTBW 2020 B5IR Rep 2	0.00071074	Not significant after Bonferroni correction
7A_56911625	7A	56911625	Zinc YTBW 2020 B5IR Rep 2	0.00071074	Not significant after Bonferroni correction
7A_56975201	7A	56975201	Zinc YTBW 2020 B5IR Rep 2	0.00067229	Not significant after Bonferroni correction
7A_56978504	7A	56978504	Zinc YTBW 2020 B5IR Rep 2	0.00083732	Not significant after Bonferroni correction
7A_57096804	7A	57096804	Zinc YTZN 2020 B5IR Rep 1	0.00073679	Not significant after Bonferroni correction
7A_57096804	7A	57096804	Zinc YTBW 2020 B5IR Rep 2	0.00092181	Not significant after Bonferroni correction
7A_57207040	7A	57207040	Zinc YTBW 2020 B5IR Rep 2	0.00087159	Not significant after Bonferroni correction
7A_57490928	7A	57490928	Zinc YTBW 2020 B5IR BLUEs	0.00029377	Not significant after Bonferroni correction
7A_57490928	7A	57490928	Zinc YTBW 2020 B5IR Rep 2	0.00058596	Not significant after Bonferroni correction
7A_57802535	7A	57802535	Zinc YTBW 2020 B5IR Rep 2	6.0081e-05	Not significant after Bonferroni correction
7A_57802535	7A	57802535	Zinc YTBW 2020 B5IR BLUEs	0.00029425	Not significant after Bonferroni correction
7A_61774265	7A	61774265	Iron EYTBW 2021 B5IR Rep 2	0.00089412	Not significant after Bonferroni correction
7A_65090371	7A	65090371	Iron YTZN 2019 B5IR Rep 3	0.00034464	Not significant after Bonferroni correction
7A_65360952	7A	65360952	Iron EYTBW 2021 all environments BLUEs	0.0003045	Not significant after Bonferroni correction
7A_65360952	7A	65360952	Iron EYTBW 2021 SP BLUEs	0.00031979	Not significant after Bonferroni correction
7A_65360952	7A	65360952	Iron EYTBW 2021 SP Rep 1	0.0007043	Not significant after Bonferroni correction
7A_66220298	7A	66220298	Iron EYTBW 2021 SP BLUEs	0.0004285	Not significant after Bonferroni correction
7A_68211963	7A	68211963	Iron EYTBW 2021 SP BLUEs	0.00015449	Not significant after Bonferroni correction
7A_68211963	7A	68211963	Iron EYTBW 2021 all environments BLUEs	0.00017846	Not significant after Bonferroni correction
7A_68211963	7A	68211963	Iron EYTBW 2021 SP Rep 1	0.00037178	Not significant after Bonferroni correction
7A_68344734	7A	68344734	Iron EYTBW 2021 all environments BLUEs	0.00026141	Not significant after Bonferroni correction
7A_68344734	7A	68344734	Iron EYTBW 2021 SP BLUEs	0.00033549	Not significant after Bonferroni correction
7A_68774152	7A	68774152	Iron EYTBW 2021 all environments BLUEs	0.0001601	Not significant after Bonferroni correction
7A_68774152	7A	68774152	Iron EYTBW 2021 SP BLUEs	0.00035728	Not significant after Bonferroni correction
7A_68774152	7A	68774152	Iron EYTBW 2021 SP Rep 1	0.00093115	Not significant after Bonferroni correction
7A_69311409	7A	69311409	Iron EYTBW 2021 all environments BLUEs	0.00036333	Not significant after Bonferroni correction
7A_69311409	7A	69311409	Iron EYTBW 2021 SP Rep 1	0.00058953	Not significant after Bonferroni correction
7A_69311409	7A	69311409	Iron EYTBW 2021 SP BLUEs	0.00061146	Not significant after Bonferroni correction
7A_69937982	7A	69937982	Iron EYTBW 2021 SP BLUEs	0.00029859	Not significant after Bonferroni correction
7A_69937982	7A	69937982	Iron EYTBW 2021 all environments BLUEs	0.00060859	Not significant after Bonferroni correction
7A_69975143	7A	69975143	Iron EYTBW 2021 all environments BLUEs	0.00020348	Not significant after Bonferroni correction
7A_69975143	7A	69975143	Iron EYTBW 2021 SP BLUEs	0.00026889	Not significant after Bonferroni correction
7A_70208197	7A	70208197	Iron EYTBW 2021 SP BLUEs	0.00023504	Not significant after Bonferroni correction
7A_70208197	7A	70208197	Iron EYTBW 2021 all environments BLUEs	0.00024413	Not significant after Bonferroni correction
7A_70208197	7A	70208197	Iron EYTBW 2021 SP Rep 1	0.00086816	Not significant after Bonferroni correction
7A_71591808	7A	71591808	Iron EYTBW 2021 SP BLUEs	0.00036572	Not significant after Bonferroni correction
7A_71591808	7A	71591808	Iron EYTBW 2021 all environments BLUEs	0.00087193	Not significant after Bonferroni correction
7A_76114512	7A	76114512	Iron EYTBW 2021 SP Rep 1	0.00088044	Not significant after Bonferroni correction
7A_77030667	7A	77030667	Zinc EYTBW 2021 B5IR Rep 1	0.00099082	Not significant after Bonferroni correction
7A_87822707	7A	87822707	Zinc EYTBW 2021 B5IR Rep 2	0.00034588	Not significant after Bonferroni correction
7A_99667766	7A	99667766	Iron EYTBW 2021 SP Rep 1	0.00062452	Not significant after Bonferroni correction
7A_127644646	7A	127644646	Iron YTZN 2021 B5IR Rep 2	7.7545e-05	Not significant after Bonferroni correction
7A_127644646	7A	127644646	Iron YTZN 2021 B5IR BLUEs	0.00095627	Not significant after Bonferroni correction
7A_127910397	7A	127910397	Iron YTBW 2020 B5IR BLUEs	0.00070479	Not significant after Bonferroni correction
7A_232330667	7A	232330667	Iron EYTBW 2021 B2IR BLUEs	0.00076504	Not significant after Bonferroni correction
7A_232331573	7A	232331573	Iron EYTBW 2021 B2IR BLUEs	0.0008665	Not significant after Bonferroni correction
7A_232523043	7A	232523043	Iron EYTBW 2021 B2IR Rep 2	0.00062017	Not significant after Bonferroni correction
7A_232523043	7A	232523043	Iron EYTBW 2021 B2IR Rep 1	0.00062152	Not significant after Bonferroni correction
7A_232532941	7A	232532941	Iron EYTBW 2021 B2IR BLUEs	0.00086933	Not significant after Bonferroni correction
7A_237957211	7A	237957211	Iron EYTBW 2021 B2IR BLUEs	0.00099196	Not significant after Bonferroni correction
7A_244602603	7A	244602603	Iron YTZN 2020 B5IR BLUEs	8.9457e-05	Not significant after Bonferroni correction
7A_244602603	7A	244602603	Iron YTZN 2020 B5IR Rep 3	0.00047613	Not significant after Bonferroni correction
7A_266640411	7A	266640411	Iron EYTBW 2021 B2IR BLUEs	0.00089908	Not significant after Bonferroni correction
7A_266640411	7A	266640411	Iron EYTBW 2021 B2IR Rep 2	0.00096869	Not significant after Bonferroni correction
7A_275746979	7A	275746979	Iron EYTBW 2021 B2IR BLUEs	0.00073096	Not significant after Bonferroni correction
7A_283915288	7A	283915288	Iron EYTBW 2021 B2IR BLUEs	0.00058512	Not significant after Bonferroni correction
7A_284113541	7A	284113541	Iron EYTBW 2021 B2IR BLUEs	0.00075299	Not significant after Bonferroni correction
7A_285435740	7A	285435740	Iron EYTBW 2021 B2IR BLUEs	0.00022336	Not significant after Bonferroni correction
7A_285435740	7A	285435740	Iron EYTBW 2021 B2IR Rep 2	0.00057589	Not significant after Bonferroni correction
7A_286518685	7A	286518685	Iron EYTBW 2021 B2IR BLUEs	0.00018992	Not significant after Bonferroni correction
7A_286518685	7A	286518685	Iron EYTBW 2021 B2IR Rep 2	0.00087771	Not significant after Bonferroni correction
7A_287007006	7A	287007006	Iron EYTBW 2021 B2IR Rep 2	5.3128e-05	Not significant after Bonferroni correction
7A_287007006	7A	287007006	Iron EYTBW 2021 B2IR BLUEs	0.00017337	Not significant after Bonferroni correction
7A_351568784	7A	351568784	Zinc EYTBW 2021 B5IR BLUEs	0.00019062	Not significant after Bonferroni correction
7A_423788368	7A	423788368	Iron EYTBW 2021 all environments BLUEs	0.0009647	Not significant after Bonferroni correction
7A_487636684	7A	487636684	Iron EYTBW 2021 B2IR BLUEs	0.00018544	Not significant after Bonferroni correction
7A_490273438	7A	490273438	Iron EYTBW 2021 B2IR BLUEs	6.3323e-05	Not significant after Bonferroni correction
7A_490273438	7A	490273438	Iron EYTBW 2021 B2IR Rep 2	0.00088389	Not significant after Bonferroni correction
7A_495536952	7A	495536952	Iron EYTBW 2021 B2IR BLUEs	6.09e-05	Not significant after Bonferroni correction
7A_495539751	7A	495539751	Iron EYTBW 2021 B2IR BLUEs	2.7924e-05	Not significant after Bonferroni correction
7A_495539751	7A	495539751	Iron EYTBW 2021 B2IR Rep 2	0.00014931	Not significant after Bonferroni correction
7A_495927542	7A	495927542	Iron EYTBW 2021 B2IR Rep 1	0.00017674	Not significant after Bonferroni correction
7A_495927542	7A	495927542	Iron EYTBW 2021 B2IR Rep 2	0.00018985	Not significant after Bonferroni correction
7A_496647841	7A	496647841	Iron EYTBW 2021 B2IR BLUEs	2.4887e-05	Not significant after Bonferroni correction
7A_496647841	7A	496647841	Iron EYTBW 2021 B2IR Rep 2	0.00013225	Not significant after Bonferroni correction
7A_501133261	7A	501133261	Iron EYTBW 2021 B2IR BLUEs	0.00035738	Not significant after Bonferroni correction
7A_506817995	7A	506817995	Iron EYTBW 2021 B2IR BLUEs	0.00090371	Not significant after Bonferroni correction
7A_512584237	7A	512584237	Iron EYTBW 2021 B2IR BLUEs	0.00069113	Not significant after Bonferroni correction
7A_514442496	7A	514442496	Iron EYTBW 2021 B2IR BLUEs	0.00055529	Not significant after Bonferroni correction
7A_516508921	7A	516508921	Iron EYTZN 2020 B5IR Rep 2	0.0002593	Not significant after Bonferroni correction
7A_519559148	7A	519559148	Iron EYTBW 2021 B2IR Rep 2	0.00033886	Not significant after Bonferroni correction
7A_519559148	7A	519559148	Iron EYTBW 2021 B2IR BLUEs	0.00076435	Not significant after Bonferroni correction
7A_529437855	7A	529437855	Iron EYTZN 2020 B5IR Rep 2	0.00046222	Not significant after Bonferroni correction
7A_529453972	7A	529453972	Iron EYTZN 2020 B5IR Rep 2	0.00027781	Not significant after Bonferroni correction
7A_530521601	7A	530521601	Iron EYTBW 2021 B2IR Rep 2	0.00021282	Not significant after Bonferroni correction
7A_533596187	7A	533596187	Iron EYTBW 2021 B2IR Rep 2	0.00042855	Not significant after Bonferroni correction
7A_533596187	7A	533596187	Iron EYTBW 2021 B2IR BLUEs	0.00057738	Not significant after Bonferroni correction
7A_538782522	7A	538782522	Zinc YTBW 2020 B5IR BLUEs	0.00074013	Not significant after Bonferroni correction
7A_539326120	7A	539326120	Iron EYTBW 2021 B2IR Rep 2	0.00090226	Not significant after Bonferroni correction
7A_539935254	7A	539935254	Iron EYTBW 2021 B2IR Rep 2	0.00055739	Not significant after Bonferroni correction
7A_540774684	7A	540774684	Iron EYTBW 2021 B2IR Rep 2	0.00043091	Not significant after Bonferroni correction
7A_540872124	7A	540872124	Iron EYTBW 2021 B2IR Rep 2	0.00069691	Not significant after Bonferroni correction
7A_549136148	7A	549136148	Zinc YTZN 2020 B5IR Rep 2	0.00066323	Not significant after Bonferroni correction
7A_562626215	7A	562626215	Iron EYTBW 2021 B2IR Rep 2	0.00087252	Not significant after Bonferroni correction
7A_563604700	7A	563604700	Iron EYTBW 2021 B2IR BLUEs	0.00023037	Not significant after Bonferroni correction
7A_567030080	7A	567030080	Iron EYTBW 2021 B2IR BLUEs	0.00052053	Not significant after Bonferroni correction
7A_567030080	7A	567030080	Iron EYTBW 2021 B2IR Rep 2	0.00072366	Not significant after Bonferroni correction
7A_573128811	7A	573128811	Zinc EYTBW 2021 SP Rep 2	0.00041504	Not significant after Bonferroni correction
7A_578984763	7A	578984763	Iron EYTBW 2021 B2IR BLUEs	0.00096697	Not significant after Bonferroni correction
7A_579648980	7A	579648980	Iron EYTBW 2021 B2IR Rep 1	4.6251e-05	Not significant after Bonferroni correction
7A_579648980	7A	579648980	Iron EYTBW 2021 B2IR BLUEs	0.00032372	Not significant after Bonferroni correction
7A_581035740	7A	581035740	Zinc EYTBW 2021 B5IR BLUEs	0.00063885	Not significant after Bonferroni correction
7A_583357234	7A	583357234	Zinc EYTBW 2021 B5IR BLUEs	0.00099543	Not significant after Bonferroni correction
7A_583872665	7A	583872665	Iron EYTBW 2021 B2IR BLUEs	0.00041712	Not significant after Bonferroni correction
7A_584268629	7A	584268629	Iron EYTBW 2021 B5IR Rep 2	0.00030415	Not significant after Bonferroni correction
7A_584268629	7A	584268629	Iron EYTBW 2021 all environments BLUEs	0.00081049	Not significant after Bonferroni correction
7A_585950363	7A	585950363	Iron EYTBW 2021 B5IR Rep 2	0.00051894	Not significant after Bonferroni correction
7A_596685453	7A	596685453	Iron EYTBW 2021 B2IR Rep 2	0.00069555	Not significant after Bonferroni correction
7A_596685453	7A	596685453	Iron EYTBW 2021 B2IR Rep 1	0.00072184	Not significant after Bonferroni correction
7A_600556352	7A	600556352	Iron EYTBW 2021 B2IR Rep 1	0.00012782	Not significant after Bonferroni correction
7A_600556352	7A	600556352	Iron EYTBW 2021 B2IR Rep 2	0.00077858	Not significant after Bonferroni correction
7A_603132473	7A	603132473	Zinc EYTBW 2021 all environments BLUEs	0.00045132	Not significant after Bonferroni correction
7A_603561751	7A	603561751	Zinc EYTBW 2021 B5IR BLUEs	0.00021293	Not significant after Bonferroni correction
7A_605112972	7A	605112972	Zinc EYTBW 2021 B5IR BLUEs	0.00081258	Not significant after Bonferroni correction
7A_610195384	7A	610195384	Iron EYTBW 2021 B5IR Rep 2	0.00070968	Not significant after Bonferroni correction
7A_642219073	7A	642219073	Zinc EYTBW 2021 SP Rep 2	0.00022375	Not significant after Bonferroni correction
7A_642394634	7A	642394634	Zinc EYTBW 2021 SP Rep 2	0.0009588	Not significant after Bonferroni correction
7A_642424915	7A	642424915	Zinc EYTBW 2021 SP Rep 2	0.00045602	Not significant after Bonferroni correction
7A_643966175	7A	643966175	Zinc EYTBW 2021 SP Rep 2	0.00059162	Not significant after Bonferroni correction
7A_652540761	7A	652540761	Iron YTZN 2020 B5IR Rep 2	0.00058008	Not significant after Bonferroni correction
7A_670016136	7A	670016136	Iron EYTBW 2021 B5IR Rep 1	6.8889e-05	Not significant after Bonferroni correction
7A_670016136	7A	670016136	Iron EYTBW 2021 B5IR BLUEs	7.5734e-05	Not significant after Bonferroni correction
7A_670289639	7A	670289639	Iron EYTBW 2021 B2IR Rep 2	0.00048065	Not significant after Bonferroni correction
7A_670716705	7A	670716705	Zinc EYTBW 2021 B2IR Rep 2	0.00033634	Not significant after Bonferroni correction
7A_675314594	7A	675314594	Iron EYTBW 2021 all environments BLUEs	0.00086777	Not significant after Bonferroni correction
7A_681971376	7A	681971376	Iron EYTBW 2021 B5IR Rep 1	0.00064082	Not significant after Bonferroni correction
7A_693692752	7A	693692752	Zinc YTZN 2019 B5IR Rep 1	0.00082548	Not significant after Bonferroni correction
7A_700055437	7A	700055437	Zinc EYTBW 2021 SP Rep 1	0.00050977	Not significant after Bonferroni correction
7A_700055459	7A	700055459	Iron EYTBW 2021 SP Rep 1	2.3505e-05	Not significant after Bonferroni correction
7A_701569874	7A	701569874	Iron YTBW 2020 B5IR Rep 1	0.00035538	Not significant after Bonferroni correction
7A_706670599	7A	706670599	Zinc EYTZN 2021 B5IR Rep 2	0.00090456	Not significant after Bonferroni correction
7A_707762298	7A	707762298	Zinc EYTBW 2021 B5IR Rep 2	0.00059445	Not significant after Bonferroni correction
7A_707834631	7A	707834631	Zinc EYTBW 2021 B5IR Rep 2	0.00074315	Not significant after Bonferroni correction
7A_709769485	7A	709769485	Zinc EYTBW 2021 B5IR Rep 2	0.00022569	Not significant after Bonferroni correction
7A_709825034	7A	709825034	Zinc EYTBW 2021 B5IR Rep 2	0.00044633	Not significant after Bonferroni correction
7A_711278852	7A	711278852	Zinc EYTBW 2021 B5IR Rep 2	1.8937e-05	Not significant after Bonferroni correction
7A_711921492	7A	711921492	Zinc EYTBW 2021 B5IR Rep 2	0.00078107	Not significant after Bonferroni correction
7A_712422217	7A	712422217	Zinc EYTBW 2021 B5IR Rep 2	0.00066154	Not significant after Bonferroni correction
7A_713737599	7A	713737599	Zinc EYTBW 2021 B5IR Rep 2	0.00031346	Not significant after Bonferroni correction
7A_714662345	7A	714662345	Zinc EYTBW 2021 B5IR Rep 2	0.00091614	Not significant after Bonferroni correction
7A_714981471	7A	714981471	Zinc EYTBW 2021 B5IR Rep 2	0.00028071	Not significant after Bonferroni correction
7A_715124244	7A	715124244	Zinc EYTBW 2021 B5IR Rep 2	0.00043828	Not significant after Bonferroni correction
7A_715784916	7A	715784916	Zinc EYTBW 2021 B5IR Rep 2	0.00026488	Not significant after Bonferroni correction
7A_715784970	7A	715784970	Zinc EYTBW 2021 B5IR Rep 2	0.00045037	Not significant after Bonferroni correction
7A_717137201	7A	717137201	Zinc EYTBW 2021 B5IR Rep 2	0.00032133	Not significant after Bonferroni correction
7A_717825109	7A	717825109	Zinc EYTBW 2021 B5IR Rep 2	0.00070491	Not significant after Bonferroni correction
7A_718262768	7A	718262768	Zinc EYTBW 2021 B5IR Rep 2	0.00058436	Not significant after Bonferroni correction
7A_718262768	7A	718262768	Zinc EYTBW 2021 B5IR BLUEs	0.00076182	Not significant after Bonferroni correction
7A_719497099	7A	719497099	Zinc EYTBW 2021 B5IR Rep 2	0.00045743	Not significant after Bonferroni correction
7A_720626443	7A	720626443	Zinc EYTBW 2021 B5IR Rep 2	0.00051281	Not significant after Bonferroni correction
7A_720909663	7A	720909663	Zinc EYTBW 2021 B5IR Rep 2	0.00026092	Not significant after Bonferroni correction
7A_721659571	7A	721659571	Iron EYTZN 2020 B5IR Rep 3	4.8187e-05	Not significant after Bonferroni correction
7A_721659571	7A	721659571	Zinc EYTZN 2020 B5IR Rep 3	0.00025529	Not significant after Bonferroni correction
7A_723279863	7A	723279863	Iron EYTZN 2021 B5IR Rep 2	0.0009929	Not significant after Bonferroni correction
7A_732898322	7A	732898322	Iron YTBW 2021 B5IR Rep 1	0.00068648	Not significant after Bonferroni correction
7B_6239399	7B	6239399	Zinc YTZN 2019 B5IR BLUEs	0.00034056	Not significant after Bonferroni correction
7B_23162173	7B	23162173	Zinc EYTZN 2021 B5IR Rep 1	0.00026272	Not significant after Bonferroni correction
7B_34172756	7B	34172756	Zinc EYTBW 2021 B2IR Rep 1	0.00054263	Not significant after Bonferroni correction
7B_40086434	7B	40086434	Iron EYTBW 2021 B2IR Rep 2	0.00086357	Not significant after Bonferroni correction
7B_40344840	7B	40344840	Zinc YTBW 2020 B5IR Rep 2	0.00023808	Not significant after Bonferroni correction
7B_42581873	7B	42581873	Iron EYTBW 2021 B2IR Rep 2	0.00017704	Not significant after Bonferroni correction
7B_46578025	7B	46578025	Iron YTZN 2020 B5IR Rep 2	0.00051223	Not significant after Bonferroni correction
7B_56377043	7B	56377043	Zinc EYTBW 2021 B2IR Rep 2	0.00084043	Not significant after Bonferroni correction
7B_57459710	7B	57459710	Zinc EYTBW 2021 B2IR Rep 2	0.00015144	Not significant after Bonferroni correction
7B_57679883	7B	57679883	Zinc EYTBW 2021 B2IR Rep 2	0.00058417	Not significant after Bonferroni correction
7B_58239136	7B	58239136	Zinc EYTBW 2021 B2IR Rep 2	0.00010016	Not significant after Bonferroni correction
7B_64390515	7B	64390515	Iron EYTBW 2021 B2IR Rep 1	0.0007218	Not significant after Bonferroni correction
7B_64417798	7B	64417798	Iron EYTBW 2021 B2IR Rep 1	0.00099658	Not significant after Bonferroni correction
7B_65351368	7B	65351368	Iron EYTBW 2021 B2IR Rep 1	0.00072098	Not significant after Bonferroni correction
7B_65376886	7B	65376886	Iron EYTBW 2021 B2IR Rep 1	0.00059354	Not significant after Bonferroni correction
7B_65592090	7B	65592090	Iron EYTBW 2021 B2IR BLUEs	0.00012895	Not significant after Bonferroni correction
7B_65870045	7B	65870045	Iron EYTBW 2021 B2IR Rep 1	0.000449	Not significant after Bonferroni correction
7B_66021438	7B	66021438	Iron EYTBW 2021 B2IR Rep 1	0.00012905	Not significant after Bonferroni correction
7B_66021438	7B	66021438	Iron EYTBW 2021 all environments BLUEs	0.00039327	Not significant after Bonferroni correction
7B_66021438	7B	66021438	Iron EYTBW 2021 B2IR BLUEs	0.00076145	Not significant after Bonferroni correction
7B_68246015	7B	68246015	Iron EYTBW 2021 B2IR Rep 1	0.0005806	Not significant after Bonferroni correction
7B_68340557	7B	68340557	Iron EYTBW 2021 B2IR Rep 1	0.00037528	Not significant after Bonferroni correction
7B_72278262	7B	72278262	Iron EYTBW 2021 B2IR Rep 1	0.00086217	Not significant after Bonferroni correction
7B_98980714	7B	98980714	Iron EYTBW 2021 B5IR Rep 1	5.5347e-05	Not significant after Bonferroni correction
7B_100330171	7B	100330171	Iron EYTBW 2021 B5IR Rep 1	0.00053596	Not significant after Bonferroni correction
7B_113197896	7B	113197896	Iron EYTBW 2021 B2IR BLUEs	0.00099309	Not significant after Bonferroni correction
7B_113769083	7B	113769083	Iron EYTBW 2021 all environments BLUEs	0.00010105	Not significant after Bonferroni correction
7B_115377252	7B	115377252	Zinc YTBW 2020 B5IR BLUEs	0.00030193	Not significant after Bonferroni correction
7B_115377252	7B	115377252	Zinc YTBW 2020 B5IR Rep 1	0.00030486	Not significant after Bonferroni correction
7B_115377252	7B	115377252	Iron EYTBW 2021 B2IR BLUEs	0.0003373	Not significant after Bonferroni correction
7B_115377252	7B	115377252	Iron EYTBW 2021 B2IR Rep 2	0.00086867	Not significant after Bonferroni correction
7B_115480504	7B	115480504	Zinc YTBW 2020 B5IR Rep 2	4.6918e-05	Not significant after Bonferroni correction
7B_115480504	7B	115480504	Zinc EYTBW 2021 B5IR Rep 1	0.00050535	Not significant after Bonferroni correction
7B_119368300	7B	119368300	Zinc EYTBW 2021 B2IR BLUEs	9.3646e-05	Not significant after Bonferroni correction
7B_119368300	7B	119368300	Zinc YTBW 2020 B5IR BLUEs	0.0004811	Not significant after Bonferroni correction
7B_119368300	7B	119368300	Zinc YTBW 2020 B5IR Rep 1	0.00072811	Not significant after Bonferroni correction
7B_119368300	7B	119368300	Zinc EYTBW 2021 B2IR Rep 2	0.0008662	Not significant after Bonferroni correction
7B_121570273	7B	121570273	Zinc YTBW 2020 B5IR Rep 1	3.3963e-05	Not significant after Bonferroni correction
7B_121570273	7B	121570273	Zinc YTBW 2020 B5IR BLUEs	3.5173e-05	Not significant after Bonferroni correction
7B_121570273	7B	121570273	Zinc YTBW 2020 B5IR Rep 2	0.00036912	Not significant after Bonferroni correction
7B_121570273	7B	121570273	Zinc EYTBW 2021 B5IR Rep 1	0.0009343	Not significant after Bonferroni correction
7B_121901182	7B	121901182	Zinc YTBW 2020 B5IR BLUEs	0.00034952	Not significant after Bonferroni correction
7B_121901182	7B	121901182	Zinc YTBW 2020 B5IR Rep 1	0.00067017	Not significant after Bonferroni correction
7B_125884505	7B	125884505	Zinc YTBW 2020 B5IR BLUEs	0.00038823	Not significant after Bonferroni correction
7B_126740591	7B	126740591	Iron EYTBW 2021 B2IR Rep 2	0.00022376	Not significant after Bonferroni correction
7B_126740591	7B	126740591	Iron EYTBW 2021 B2IR BLUEs	0.00039495	Not significant after Bonferroni correction
7B_126740591	7B	126740591	Iron EYTBW 2021 all environments BLUEs	0.00090161	Not significant after Bonferroni correction
7B_130863721	7B	130863721	Iron EYTBW 2021 B2IR Rep 2	0.0009578	Not significant after Bonferroni correction
7B_131073897	7B	131073897	Iron EYTBW 2021 B2IR BLUEs	0.00027525	Not significant after Bonferroni correction
7B_131073897	7B	131073897	Iron YTZN 2020 B5IR Rep 2	0.00044878	Not significant after Bonferroni correction
7B_131073897	7B	131073897	Iron EYTBW 2021 B2IR Rep 2	0.00064247	Not significant after Bonferroni correction
7B_131374909	7B	131374909	Iron EYTBW 2021 B2IR Rep 2	0.00021296	Not significant after Bonferroni correction
7B_131374909	7B	131374909	Iron EYTBW 2021 B2IR BLUEs	0.00032131	Not significant after Bonferroni correction
7B_131374909	7B	131374909	Iron EYTBW 2021 all environments BLUEs	0.00073972	Not significant after Bonferroni correction
7B_141804056	7B	141804056	Zinc YTBW 2020 B5IR BLUEs	0.00073677	Not significant after Bonferroni correction
7B_148945815	7B	148945815	Zinc YTZN 2019 B5IR Rep 1	0.00066609	Not significant after Bonferroni correction
7B_148945815	7B	148945815	Iron EYTBW 2021 B2IR BLUEs	0.00091046	Not significant after Bonferroni correction
7B_150561154	7B	150561154	Zinc YTBW 2020 B5IR BLUEs	0.00031488	Not significant after Bonferroni correction
7B_158934686	7B	158934686	Iron EYTBW 2021 all environments BLUEs	0.00086641	Not significant after Bonferroni correction
7B_164151731	7B	164151731	Iron EYTBW 2021 all environments BLUEs	0.00026513	Not significant after Bonferroni correction
7B_168075214	7B	168075214	Iron EYTBW 2021 B2IR BLUEs	0.00025765	Not significant after Bonferroni correction
7B_168075214	7B	168075214	Iron EYTBW 2021 all environments BLUEs	0.00042784	Not significant after Bonferroni correction
7B_168075214	7B	168075214	Iron EYTBW 2021 B2IR Rep 2	0.00097052	Not significant after Bonferroni correction
7B_171279317	7B	171279317	Iron EYTBW 2021 B2IR BLUEs	0.00028102	Not significant after Bonferroni correction
7B_171279317	7B	171279317	Iron EYTBW 2021 B2IR Rep 2	0.00091227	Not significant after Bonferroni correction
7B_177246492	7B	177246492	Zinc EYTZN 2021 B5IR Rep 1	0.00075312	Not significant after Bonferroni correction
7B_183914395	7B	183914395	Iron EYTBW 2021 B5IR BLUEs	0.00019117	Not significant after Bonferroni correction
7B_188973552	7B	188973552	Zinc EYTBW 2021 B5IR Rep 1	0.00039306	Not significant after Bonferroni correction
7B_196275863	7B	196275863	Iron EYTBW 2021 B2IR Rep 1	1.7575e-05	Not significant after Bonferroni correction
7B_196275863	7B	196275863	Iron EYTBW 2021 all environments BLUEs	0.0009717	Not significant after Bonferroni correction
7B_196382351	7B	196382351	Iron EYTBW 2021 B2IR BLUEs	0.00026684	Not significant after Bonferroni correction
7B_196382351	7B	196382351	Iron EYTBW 2021 all environments BLUEs	0.00078158	Not significant after Bonferroni correction
7B_196382351	7B	196382351	Zinc YTZN 2019 B5IR Rep 3	0.00078518	Not significant after Bonferroni correction
7B_223178621	7B	223178621	Zinc EYTBW 2021 all environments BLUEs	0.00043211	Not significant after Bonferroni correction
7B_223178621	7B	223178621	Iron EYTBW 2021 B2IR Rep 1	0.00072046	Not significant after Bonferroni correction
7B_223178621	7B	223178621	Zinc EYTBW 2021 B2IR BLUEs	0.00088	Not significant after Bonferroni correction
7B_223178621	7B	223178621	Zinc EYTBW 2021 B5IR Rep 1	0.0009369	Not significant after Bonferroni correction
7B_240325318	7B	240325318	Iron EYTBW 2021 B2IR BLUEs	4.3508e-05	Not significant after Bonferroni correction
7B_240325318	7B	240325318	Iron EYTBW 2021 B2IR Rep 2	0.00056934	Not significant after Bonferroni correction
7B_306829695	7B	306829695	Iron EYTBW 2021 B2IR BLUEs	0.0004516	Not significant after Bonferroni correction
7B_328548437	7B	328548437	Iron EYTBW 2021 all environments BLUEs	0.00050008	Not significant after Bonferroni correction
7B_329792071	7B	329792071	Iron EYTBW 2021 B2IR BLUEs	0.00044428	Not significant after Bonferroni correction
7B_329792071	7B	329792071	Iron EYTBW 2021 all environments BLUEs	0.00076449	Not significant after Bonferroni correction
7B_334456912	7B	334456912	Iron EYTBW 2021 B2IR Rep 1	0.00083366	Not significant after Bonferroni correction
7B_377008881	7B	377008881	Iron EYTBW 2021 B2IR BLUEs	4.8655e-05	Not significant after Bonferroni correction
7B_377008881	7B	377008881	Iron EYTBW 2021 B2IR Rep 2	0.00016866	Not significant after Bonferroni correction
7B_377008881	7B	377008881	Iron EYTBW 2021 all environments BLUEs	0.00021662	Not significant after Bonferroni correction
7B_385328659	7B	385328659	Zinc EYTBW 2021 B2IR Rep 2	0.00017451	Not significant after Bonferroni correction
7B_393314447	7B	393314447	Zinc EYTBW 2021 B2IR Rep 2	0.00013474	Not significant after Bonferroni correction
7B_393314447	7B	393314447	Zinc EYTBW 2021 B2IR Rep 1	0.00038686	Not significant after Bonferroni correction
7B_442353580	7B	442353580	Iron EYTBW 2021 all environments BLUEs	0.0001166	Not significant after Bonferroni correction
7B_442353580	7B	442353580	Iron EYTBW 2021 B5IR Rep 2	0.00062618	Not significant after Bonferroni correction
7B_480214096	7B	480214096	Zinc EYTBW 2021 B2IR BLUEs	0.00053341	Not significant after Bonferroni correction
7B_486028824	7B	486028824	Zinc EYTBW 2021 B5IR Rep 1	0.00060183	Not significant after Bonferroni correction
7B_486832938	7B	486832938	Zinc EYTBW 2021 B2IR BLUEs	0.0007135	Not significant after Bonferroni correction
7B_487175747	7B	487175747	Zinc EYTBW 2021 B2IR BLUEs	0.00010419	Not significant after Bonferroni correction
7B_495869463	7B	495869463	Iron EYTBW 2021 B2IR Rep 2	0.00085804	Not significant after Bonferroni correction
7B_495869463	7B	495869463	Iron EYTBW 2021 B2IR BLUEs	0.0009522	Not significant after Bonferroni correction
7B_514834568	7B	514834568	Zinc EYTBW 2021 B2IR BLUEs	0.00020315	Not significant after Bonferroni correction
7B_516450006	7B	516450006	Zinc EYTBW 2021 B2IR Rep 1	0.0001735	Not significant after Bonferroni correction
7B_516450006	7B	516450006	Zinc EYTBW 2021 all environments BLUEs	0.00018489	Not significant after Bonferroni correction
7B_516450006	7B	516450006	Zinc EYTBW 2021 B2IR Rep 2	0.00036551	Not significant after Bonferroni correction
7B_518018548	7B	518018548	Iron EYTBW 2021 B2IR BLUEs	9.4474e-05	Not significant after Bonferroni correction
7B_518018548	7B	518018548	Iron EYTBW 2021 B2IR Rep 2	0.00017051	Not significant after Bonferroni correction
7B_518835143	7B	518835143	Zinc EYTBW 2021 B2IR BLUEs	4.8703e-05	Not significant after Bonferroni correction
7B_518835143	7B	518835143	Zinc EYTBW 2021 B2IR Rep 2	0.00090034	Not significant after Bonferroni correction
7B_518835183	7B	518835183	Iron EYTBW 2021 B2IR BLUEs	0.00016389	Not significant after Bonferroni correction
7B_518835183	7B	518835183	Iron EYTBW 2021 B2IR Rep 2	0.00033324	Not significant after Bonferroni correction
7B_520632340	7B	520632340	Zinc EYTBW 2021 B2IR Rep 1	2.4799e-05	Not significant after Bonferroni correction
7B_520632340	7B	520632340	Zinc EYTBW 2021 all environments BLUEs	4.7752e-05	Not significant after Bonferroni correction
7B_520632340	7B	520632340	Zinc EYTBW 2021 B2IR Rep 2	5.5476e-05	Not significant after Bonferroni correction
7B_521279280	7B	521279280	Zinc EYTBW 2021 B2IR Rep 2	4.5641e-05	Not significant after Bonferroni correction
7B_521279280	7B	521279280	Zinc EYTBW 2021 all environments BLUEs	0.00021041	Not significant after Bonferroni correction
7B_523105384	7B	523105384	Zinc EYTBW 2021 all environments BLUEs	2.911e-05	Not significant after Bonferroni correction
7B_523105384	7B	523105384	Zinc EYTBW 2021 B2IR Rep 2	3.9604e-05	Not significant after Bonferroni correction
7B_524047086	7B	524047086	Zinc EYTBW 2021 B2IR BLUEs	8.5677e-05	Not significant after Bonferroni correction
7B_524524988	7B	524524988	Zinc EYTBW 2021 B2IR BLUEs	2.7892e-05	Not significant after Bonferroni correction
7B_528946179	7B	528946179	Zinc EYTBW 2021 B2IR Rep 2	9.842e-05	Not significant after Bonferroni correction
7B_528946179	7B	528946179	Zinc EYTBW 2021 all environments BLUEs	0.00010497	Not significant after Bonferroni correction
7B_529147819	7B	529147819	Zinc EYTBW 2021 B2IR Rep 2	4.2348e-05	Not significant after Bonferroni correction
7B_529147819	7B	529147819	Zinc EYTBW 2021 all environments BLUEs	0.0001759	Not significant after Bonferroni correction
7B_529147819	7B	529147819	Zinc EYTBW 2021 B2IR Rep 1	0.0005364	Not significant after Bonferroni correction
7B_529149098	7B	529149098	Zinc EYTBW 2021 B2IR BLUEs	0.00083824	Not significant after Bonferroni correction
7B_529832236	7B	529832236	Zinc EYTBW 2021 B2IR Rep 2	2.3946e-05	Not significant after Bonferroni correction
7B_529832236	7B	529832236	Zinc EYTBW 2021 B2IR Rep 1	0.00015882	Not significant after Bonferroni correction
7B_530459507	7B	530459507	Zinc EYTBW 2021 B2IR Rep 2	4.2007e-05	Not significant after Bonferroni correction
7B_530459507	7B	530459507	Zinc EYTBW 2021 B2IR Rep 1	9.3204e-05	Not significant after Bonferroni correction
7B_530585647	7B	530585647	Zinc EYTBW 2021 SP BLUEs	0.00074146	Not significant after Bonferroni correction
7B_530585647	7B	530585647	Zinc EYTBW 2021 SP Rep 2	0.00099925	Not significant after Bonferroni correction
7B_535456974	7B	535456974	Zinc PCZN 2018 SP Rep 1	0.00060287	Not significant after Bonferroni correction
7B_535491578	7B	535491578	Iron EYTBW 2021 B2IR BLUEs	0.00058315	Not significant after Bonferroni correction
7B_537385249	7B	537385249	Zinc EYTBW 2021 B2IR BLUEs	0.00023288	Not significant after Bonferroni correction
7B_537385249	7B	537385249	Zinc EYTBW 2021 B2IR Rep 1	0.00091854	Not significant after Bonferroni correction
7B_538052460	7B	538052460	Zinc EYTBW 2021 B2IR Rep 2	0.00089364	Not significant after Bonferroni correction
7B_538052460	7B	538052460	Zinc EYTBW 2021 B2IR BLUEs	0.00098471	Not significant after Bonferroni correction
7B_538052479	7B	538052479	Zinc EYTBW 2021 B2IR BLUEs	0.00081698	Not significant after Bonferroni correction
7B_539879402	7B	539879402	Zinc EYTBW 2021 B2IR Rep 1	2.2811e-05	Not significant after Bonferroni correction
7B_539879402	7B	539879402	Zinc EYTBW 2021 all environments BLUEs	0.00036757	Not significant after Bonferroni correction
7B_539879737	7B	539879737	Zinc EYTBW 2021 all environments BLUEs	0.00078134	Not significant after Bonferroni correction
7B_539929760	7B	539929760	Zinc EYTBW 2021 B2IR BLUEs	7.0816e-05	Not significant after Bonferroni correction
7B_539929760	7B	539929760	Zinc EYTBW 2021 B2IR Rep 2	0.00052883	Not significant after Bonferroni correction
7B_540057626	7B	540057626	Zinc EYTBW 2021 B2IR BLUEs	3.7208e-05	Not significant after Bonferroni correction
7B_540057626	7B	540057626	Zinc EYTBW 2021 B2IR Rep 2	0.00030225	Not significant after Bonferroni correction
7B_541485456	7B	541485456	Zinc EYTBW 2021 B2IR Rep 1	0.00051332	Not significant after Bonferroni correction
7B_541485456	7B	541485456	Zinc EYTBW 2021 B2IR Rep 2	0.00081236	Not significant after Bonferroni correction
7B_544032561	7B	544032561	Zinc EYTBW 2021 B2IR Rep 1	3.3814e-05	Not significant after Bonferroni correction
7B_544032561	7B	544032561	Zinc EYTBW 2021 all environments BLUEs	0.0003084	Not significant after Bonferroni correction
7B_545991219	7B	545991219	Zinc EYTBW 2021 all environments BLUEs	0.00010212	Not significant after Bonferroni correction
7B_546172988	7B	546172988	Zinc EYTBW 2021 B2IR Rep 2	0.00010914	Not significant after Bonferroni correction
7B_547714243	7B	547714243	Zinc EYTBW 2021 B2IR Rep 2	0.00019453	Not significant after Bonferroni correction
7B_547714243	7B	547714243	Zinc EYTBW 2021 B2IR Rep 1	0.00037607	Not significant after Bonferroni correction
7B_548166625	7B	548166625	Zinc EYTBW 2021 B2IR BLUEs	2.0655e-05	Not significant after Bonferroni correction
7B_548166625	7B	548166625	Zinc EYTBW 2021 B2IR Rep 2	0.00032126	Not significant after Bonferroni correction
7B_549230804	7B	549230804	Zinc EYTBW 2021 B2IR Rep 2	0.00012181	Not significant after Bonferroni correction
7B_549230804	7B	549230804	Zinc EYTBW 2021 B2IR Rep 1	0.00018442	Not significant after Bonferroni correction
7B_554402299	7B	554402299	Zinc EYTBW 2021 B2IR BLUEs	3.7196e-05	Not significant after Bonferroni correction
7B_554402299	7B	554402299	Zinc EYTBW 2021 B2IR Rep 2	0.00058823	Not significant after Bonferroni correction
7B_554757174	7B	554757174	Zinc EYTBW 2021 B2IR BLUEs	9.3906e-05	Not significant after Bonferroni correction
7B_554757174	7B	554757174	Zinc EYTBW 2021 B2IR Rep 2	0.0009052	Not significant after Bonferroni correction
7B_555712338	7B	555712338	Zinc EYTBW 2021 B2IR BLUEs	1.8758e-05	Not significant after Bonferroni correction
7B_555712338	7B	555712338	Zinc EYTBW 2021 B2IR Rep 2	8.4757e-05	Not significant after Bonferroni correction
7B_555712338	7B	555712338	Zinc YTBW 2021 B5IR BLUEs	0.00039862	Not significant after Bonferroni correction
7B_557354467	7B	557354467	Zinc EYTBW 2021 B2IR BLUEs	0.00010676	Not significant after Bonferroni correction
7B_557354467	7B	557354467	Zinc YTBW 2021 B5IR BLUEs	0.0002212	Not significant after Bonferroni correction
7B_557354467	7B	557354467	Zinc EYTBW 2021 B2IR Rep 2	0.00056575	Not significant after Bonferroni correction
7B_557542393	7B	557542393	Zinc EYTBW 2021 B2IR BLUEs	2.6386e-05	Not significant after Bonferroni correction
7B_557542393	7B	557542393	Zinc EYTBW 2021 B2IR Rep 2	0.00010724	Not significant after Bonferroni correction
7B_558326652	7B	558326652	Zinc EYTBW 2021 B2IR Rep 1	0.0008295	Not significant after Bonferroni correction
7B_558365236	7B	558365236	Zinc EYTBW 2021 B2IR BLUEs	5.0307e-05	Not significant after Bonferroni correction
7B_558365236	7B	558365236	Zinc EYTBW 2021 B2IR Rep 2	0.00097958	Not significant after Bonferroni correction
7B_559003857	7B	559003857	Zinc EYTBW 2021 B2IR BLUEs	0.0001183	Not significant after Bonferroni correction
7B_559003857	7B	559003857	Zinc EYTBW 2021 B2IR Rep 2	0.00023695	Not significant after Bonferroni correction
7B_559170258	7B	559170258	Zinc EYTBW 2021 B2IR BLUEs	0.00012318	Not significant after Bonferroni correction
7B_559170258	7B	559170258	Zinc YTBW 2021 B5IR BLUEs	0.00044505	Not significant after Bonferroni correction
7B_559631849	7B	559631849	Zinc EYTBW 2021 B2IR BLUEs	2.4945e-05	Not significant after Bonferroni correction
7B_559631849	7B	559631849	Zinc EYTBW 2021 B2IR Rep 2	0.00046249	Not significant after Bonferroni correction
7B_559631849	7B	559631849	Zinc YTBW 2021 B5IR BLUEs	0.00087397	Not significant after Bonferroni correction
7B_559924996	7B	559924996	Zinc EYTBW 2021 B2IR BLUEs	0.00015558	Not significant after Bonferroni correction
7B_559924996	7B	559924996	Zinc YTBW 2021 B5IR BLUEs	0.0004918	Not significant after Bonferroni correction
7B_559924996	7B	559924996	Zinc EYTBW 2021 B2IR Rep 2	0.000657	Not significant after Bonferroni correction
7B_560449860	7B	560449860	Zinc EYTBW 2021 B2IR BLUEs	0.00040859	Not significant after Bonferroni correction
7B_560802461	7B	560802461	Zinc YTBW 2021 B5IR BLUEs	0.00011148	Not significant after Bonferroni correction
7B_560802461	7B	560802461	Zinc EYTBW 2021 all environments BLUEs	0.00014015	Not significant after Bonferroni correction
7B_560802461	7B	560802461	Zinc EYTBW 2021 B2IR Rep 1	0.00021742	Not significant after Bonferroni correction
7B_560802461	7B	560802461	Zinc EYTBW 2021 B2IR Rep 2	0.00065253	Not significant after Bonferroni correction
7B_560802461	7B	560802461	Zinc EYTBW 2021 SP Rep 1	0.00076862	Not significant after Bonferroni correction
7B_560830080	7B	560830080	Zinc EYTBW 2021 B2IR BLUEs	2.816e-05	Not significant after Bonferroni correction
7B_560830080	7B	560830080	Zinc EYTBW 2021 B2IR Rep 2	0.00029789	Not significant after Bonferroni correction
7B_560920012	7B	560920012	Zinc YTBW 2021 B5IR BLUEs	0.00032495	Not significant after Bonferroni correction
7B_560920012	7B	560920012	Zinc EYTBW 2021 B2IR BLUEs	0.0003891	Not significant after Bonferroni correction
7B_561277280	7B	561277280	Zinc EYTBW 2021 B2IR BLUEs	5.3015e-05	Not significant after Bonferroni correction
7B_561277280	7B	561277280	Zinc EYTBW 2021 B2IR Rep 2	0.00066376	Not significant after Bonferroni correction
7B_561277280	7B	561277280	Zinc YTBW 2021 B5IR BLUEs	0.00070524	Not significant after Bonferroni correction
7B_561280142	7B	561280142	Zinc EYTBW 2021 B2IR BLUEs	0.00010234	Not significant after Bonferroni correction
7B_561280142	7B	561280142	Zinc YTBW 2021 B5IR BLUEs	0.00011186	Not significant after Bonferroni correction
7B_561280142	7B	561280142	Zinc EYTBW 2021 B2IR Rep 2	0.00023498	Not significant after Bonferroni correction
7B_562159307	7B	562159307	Zinc EYTBW 2021 B2IR Rep 2	9.5456e-05	Not significant after Bonferroni correction
7B_562835425	7B	562835425	Zinc EYTBW 2021 B2IR Rep 2	0.00028118	Not significant after Bonferroni correction
7B_564053220	7B	564053220	Zinc EYTBW 2021 B2IR BLUEs	6.5794e-05	Not significant after Bonferroni correction
7B_564053220	7B	564053220	Zinc YTBW 2021 B5IR BLUEs	0.00030119	Not significant after Bonferroni correction
7B_564053220	7B	564053220	Zinc EYTBW 2021 B2IR Rep 2	0.00075604	Not significant after Bonferroni correction
7B_565054902	7B	565054902	Zinc EYTBW 2021 B2IR Rep 2	0.00052438	Not significant after Bonferroni correction
7B_565054902	7B	565054902	Zinc YTBW 2021 B5IR BLUEs	0.0005751	Not significant after Bonferroni correction
7B_565359749	7B	565359749	Zinc EYTBW 2021 B2IR BLUEs	2.2156e-05	Not significant after Bonferroni correction
7B_565359749	7B	565359749	Zinc EYTBW 2021 B2IR Rep 2	0.0001568	Not significant after Bonferroni correction
7B_568039107	7B	568039107	Zinc YTBW 2021 B5IR BLUEs	0.00034814	Not significant after Bonferroni correction
7B_568088777	7B	568088777	Zinc EYTBW 2021 B2IR BLUEs	0.00016306	Not significant after Bonferroni correction
7B_568088777	7B	568088777	Zinc YTBW 2021 B5IR BLUEs	0.00024532	Not significant after Bonferroni correction
7B_568390408	7B	568390408	Zinc EYTBW 2021 B2IR BLUEs	5.1995e-05	Not significant after Bonferroni correction
7B_568390408	7B	568390408	Zinc EYTBW 2021 B2IR Rep 2	0.00044942	Not significant after Bonferroni correction
7B_568668310	7B	568668310	Zinc EYTBW 2021 B2IR Rep 2	7.0623e-05	Not significant after Bonferroni correction
7B_570182044	7B	570182044	Zinc EYTBW 2021 B2IR BLUEs	3.2005e-05	Not significant after Bonferroni correction
7B_570182044	7B	570182044	Zinc EYTBW 2021 B2IR Rep 2	0.00025552	Not significant after Bonferroni correction
7B_570182044	7B	570182044	Zinc YTBW 2021 B5IR BLUEs	0.00055405	Not significant after Bonferroni correction
7B_570342027	7B	570342027	Zinc YTBW 2021 B5IR BLUEs	6.1016e-05	Not significant after Bonferroni correction
7B_570342027	7B	570342027	Zinc EYTBW 2021 B2IR BLUEs	0.00020197	Not significant after Bonferroni correction
7B_571588916	7B	571588916	Zinc EYTBW 2021 B2IR BLUEs	7.4714e-05	Not significant after Bonferroni correction
7B_571588916	7B	571588916	Zinc YTBW 2021 B5IR BLUEs	0.00026226	Not significant after Bonferroni correction
7B_571588916	7B	571588916	Zinc EYTBW 2021 B2IR Rep 2	0.00055113	Not significant after Bonferroni correction
7B_572159107	7B	572159107	Zinc EYTBW 2021 SP BLUEs	1.7857e-05	Not significant after Bonferroni correction
7B_572159107	7B	572159107	Zinc EYTBW 2021 SP Rep 2	0.00010594	Not significant after Bonferroni correction
7B_572421910	7B	572421910	Zinc EYTBW 2021 B2IR Rep 1	0.0001732	Not significant after Bonferroni correction
7B_572421910	7B	572421910	Zinc EYTBW 2021 B2IR Rep 2	0.00025152	Not significant after Bonferroni correction
7B_572536779	7B	572536779	Zinc EYTBW 2021 B2IR BLUEs	1.8338e-05	Not significant after Bonferroni correction
7B_572536779	7B	572536779	Zinc EYTBW 2021 B2IR Rep 1	0.00013104	Not significant after Bonferroni correction
7B_588894439	7B	588894439	Iron YTZN 2021 B5IR BLUEs	0.00022374	Not significant after Bonferroni correction
7B_588894439	7B	588894439	Iron YTZN 2021 B5IR Rep 1	0.00034919	Not significant after Bonferroni correction
7B_590815214	7B	590815214	Iron YTZN 2021 B5IR Rep 2	0.0002868	Not significant after Bonferroni correction
7B_628775374	7B	628775374	Zinc EYTBW 2021 all environments BLUEs	0.0007814	Not significant after Bonferroni correction
7B_629564355	7B	629564355	Zinc EYTBW 2021 all environments BLUEs	0.0005153	Not significant after Bonferroni correction
7B_640905007	7B	640905007	Iron YTZN 2020 B5IR BLUEs	0.00078459	Not significant after Bonferroni correction
7B_641807142	7B	641807142	Iron EYTBW 2021 B2IR BLUEs	6.7674e-05	Not significant after Bonferroni correction
7B_641807142	7B	641807142	Iron EYTBW 2021 B2IR Rep 1	0.00033836	Not significant after Bonferroni correction
7B_650337671	7B	650337671	Zinc EYTBW 2021 B2IR Rep 2	0.00094276	Not significant after Bonferroni correction
7B_652256746	7B	652256746	Zinc EYTBW 2021 B2IR BLUEs	0.00093817	Not significant after Bonferroni correction
7B_653890524	7B	653890524	Zinc EYTBW 2021 SP Rep 2	0.00015642	Not significant after Bonferroni correction
7B_658124315	7B	658124315	Zinc EYTBW 2021 SP Rep 2	0.00051576	Not significant after Bonferroni correction
7B_661792423	7B	661792423	Zinc EYTBW 2021 B5IR Rep 2	0.00037672	Not significant after Bonferroni correction
7B_661792423	7B	661792423	Zinc EYTBW 2021 B5IR BLUEs	0.00070177	Not significant after Bonferroni correction
7B_667544662	7B	667544662	Zinc EYTBW 2021 B5IR Rep 1	0.00040797	Not significant after Bonferroni correction
7B_667544662	7B	667544662	Zinc YTBW 2020 B5IR Rep 2	0.00047052	Not significant after Bonferroni correction
7B_672989865	7B	672989865	Zinc EYTZN 2020 B5IR BLUEs	0.00017165	Not significant after Bonferroni correction
7B_672989865	7B	672989865	Zinc EYTZN 2020 B5IR Rep 1	0.00025328	Not significant after Bonferroni correction
7B_677452678	7B	677452678	Iron YTZN 2021 B5IR Rep 1	3.7545e-05	Not significant after Bonferroni correction
7B_678342529	7B	678342529	Iron EYTBW 2021 B2IR BLUEs	0.00084316	Not significant after Bonferroni correction
7B_680525990	7B	680525990	Iron EYTBW 2021 B5IR Rep 2	0.00094921	Not significant after Bonferroni correction
7B_683983712	7B	683983712	Zinc YTBW 2020 B5IR BLUEs	0.00071915	Not significant after Bonferroni correction
7B_683983712	7B	683983712	Zinc YTBW 2020 B5IR Rep 2	0.00076765	Not significant after Bonferroni correction
7B_685970717	7B	685970717	Iron YTZN 2021 B5IR Rep 1	0.00090862	Not significant after Bonferroni correction
7B_711427912	7B	711427912	Zinc YTBW 2021 B5IR BLUEs	0.00085489	Not significant after Bonferroni correction
7B_714892088	7B	714892088	Iron YTZN 2021 B5IR Rep 1	0.0002861	Not significant after Bonferroni correction
7B_719147579	7B	719147579	Zinc EYTBW 2021 B5IR Rep 1	0.00088699	Not significant after Bonferroni correction
7B_723442862	7B	723442862	Iron EYTBW 2021 B2IR Rep 2	0.00073466	Not significant after Bonferroni correction
7B_740032928	7B	740032928	Iron EYTBW 2021 all environments BLUEs	0.00039593	Not significant after Bonferroni correction
7B_749331965	7B	749331965	Iron YTZN 2019 B5IR BLUEs	0.00018121	Not significant after Bonferroni correction
7D_1537886	7D	1537886	Iron YTZN 2019 B5IR Rep 3	0.00018054	Not significant after Bonferroni correction
7D_1537886	7D	1537886	Iron YTZN 2019 B5IR BLUEs	0.00071714	Not significant after Bonferroni correction
7D_1559429	7D	1559429	Zinc YTZN 2020 B5IR BLUEs	0.00082139	Not significant after Bonferroni correction
7D_4186211	7D	4186211	Iron YTZN 2019 B5IR Rep 3	0.0009798	Not significant after Bonferroni correction
7D_16317036	7D	16317036	Zinc EYTBW 2021 B2IR Rep 1	0.00016871	Not significant after Bonferroni correction
7D_34042758	7D	34042758	Iron EYTBW 2021 SP BLUEs	0.00052156	Not significant after Bonferroni correction
7D_36611691	7D	36611691	Zinc YTZN 2020 B5IR BLUEs	0.00024954	Not significant after Bonferroni correction
7D_39517235	7D	39517235	Iron PCZN 2021 SP Rep 1	0.00017587	Not significant after Bonferroni correction
7D_47262577	7D	47262577	Iron EYTBW 2021 B5IR Rep 2	0.00021064	Not significant after Bonferroni correction
7D_57904794	7D	57904794	Zinc YTZN 2019 B5IR Rep 2	0.00018598	Not significant after Bonferroni correction
7D_57904794	7D	57904794	Zinc YTZN 2019 B5IR BLUEs	0.0005626	Not significant after Bonferroni correction
7D_58206696	7D	58206696	Zinc YTBW 2020 B5IR Rep 1	0.00040461	Not significant after Bonferroni correction
7D_58486999	7D	58486999	Zinc YTBW 2020 B5IR Rep 1	0.00048594	Not significant after Bonferroni correction
7D_58486999	7D	58486999	Iron EYTZN 2020 B5IR Rep 3	0.00051492	Not significant after Bonferroni correction
7D_58633321	7D	58633321	Iron EYTBW 2021 B5IR Rep 2	0.00082146	Not significant after Bonferroni correction
7D_58928964	7D	58928964	Iron EYTBW 2021 B5IR BLUEs	0.00019711	Not significant after Bonferroni correction
7D_58928964	7D	58928964	Iron EYTBW 2021 B5IR Rep 2	0.00058653	Not significant after Bonferroni correction
7D_68291897	7D	68291897	Iron EYTBW 2021 B2IR Rep 1	0.00011586	Not significant after Bonferroni correction
7D_68291897	7D	68291897	Iron EYTBW 2021 B2IR BLUEs	0.00093808	Not significant after Bonferroni correction
7D_86752457	7D	86752457	Zinc combined panel B5IR % check	0.00066651	Not significant after Bonferroni correction
7D_132199529	7D	132199529	Zinc YTBW 2020 B5IR Rep 2	0.00098354	Not significant after Bonferroni correction
7D_141874507	7D	141874507	Iron combined panel B5IR % check	0.00085065	Not significant after Bonferroni correction
7D_179180710	7D	179180710	Iron YTZN 2019 B5IR Rep 3	0.00063125	Not significant after Bonferroni correction
7D_181974079	7D	181974079	Iron combined panel B5IR % check	2.033e-05	Not significant after Bonferroni correction
7D_309728450	7D	309728450	Iron YTZN 2020 B5IR Rep 2	0.00066071	Not significant after Bonferroni correction
7D_349861804	7D	349861804	Iron YTZN 2020 B5IR Rep 2	0.00030903	Not significant after Bonferroni correction
7D_493464983	7D	493464983	Iron EYTZN 2021 B5IR Rep 2	0.00051709	Not significant after Bonferroni correction
7D_530035575	7D	530035575	Iron EYTBW 2021 B2IR Rep 1	0.00042402	Not significant after Bonferroni correction
7D_530035575	7D	530035575	Iron EYTBW 2021 B2IR BLUEs	0.00084383	Not significant after Bonferroni correction
7D_596179706	7D	596179706	Iron EYTBW 2021 B5IR BLUEs	0.0003268	Not significant after Bonferroni correction
7D_632833563	7D	632833563	Iron EYTBW 2021 B2IR Rep 1	4.4783e-05	Not significant after Bonferroni correction
UN_15906046	UN	15906046	Iron EYTBW 2021 B2IR Rep 2	0.0009505	Not significant after Bonferroni correction
UN_32255475	UN	32255475	Iron EYTBW 2021 B2IR Rep 1	3.8732e-05	Not significant after Bonferroni correction
UN_32255475	UN	32255475	Iron EYTBW 2021 B2IR BLUEs	8.1472e-05	Not significant after Bonferroni correction
UN_51341479	UN	51341479	Zinc PCZN 2018 SP Rep 1	0.00054763	Not significant after Bonferroni correction
UN_51488786	UN	51488786	Zinc YTBW 2020 B5IR Rep 2	0.00051178	Not significant after Bonferroni correction
UN_51488786	UN	51488786	Iron YTZN 2021 B5IR Rep 1	0.000885	Not significant after Bonferroni correction
UN_77393004	UN	77393004	Zinc EYTBW 2021 all environments BLUEs	0.00028111	Not significant after Bonferroni correction
UN_77393004	UN	77393004	Zinc EYTBW 2021 B5IR Rep 1	0.00087822	Not significant after Bonferroni correction
UN_82594959	UN	82594959	Iron EYTBW 2021 B2IR BLUEs	0.00069926	Not significant after Bonferroni correction
UN_262707615	UN	262707615	Zinc EYTBW 2021 B2IR Rep 1	0.00091231	Not significant after Bonferroni correction
UN_330934317	UN	330934317	Iron EYTBW 2021 all environments BLUEs	0.00095695	Not significant after Bonferroni correction
UN_332283174	UN	332283174	Zinc EYTBW 2021 SP Rep 2	0.00011951	Not significant after Bonferroni correction
UN_455669693	UN	455669693	Iron EYTBW 2021 B5IR BLUEs	8.7243e-05	Not significant after Bonferroni correction
UN_455669693	UN	455669693	Iron EYTBW 2021 B5IR Rep 1	0.00070055	Not significant after Bonferroni correction

## Sheet: Table S5
Marker	Chr	Pos	Dataset	p-value	Significant in number of datasets
1A_4159194	1A	4159194	Zinc YTBW 2020 B5IR BLUEs	0.000247	3
1A_4159194	1A	4159194	Zinc YTBW 2020 B5IR Rep 1	0.000654	3
1A_4159194	1A	4159194	Zinc YTBW 2020 B5IR Rep 2	0.000868	3
1A_89590707	1A	89590707	Zinc YTBW 2020 B5IR BLUEs	0.000134	3
1A_89590707	1A	89590707	Zinc YTBW 2020 B5IR Rep 1	0.00066	3
1A_89590707	1A	89590707	Zinc YTBW 2020 B5IR Rep 2	0.000194	3
1B_634242993	1B	634242993	Zinc EYTZN 2021 B5IR BLUEs	7.59e-05	3
1B_634242993	1B	634242993	Zinc EYTZN 2021 B5IR Rep 1	1.02e-05	3
1B_634242993	1B	634242993	Zinc YTBW 2020 B5IR BLUEs	0.000847	3
2A_428372781	2A	428372781	Zinc EYTBW 2021 B2IR Rep 1	0.000611	4
2A_428372781	2A	428372781	Zinc EYTZN 2021 B5IR BLUEs	0.000426	4
2A_428372781	2A	428372781	Zinc EYTZN 2021 B5IR Rep 1	0.000239	4
2A_428372781	2A	428372781	Zinc YTZN 2020 B5IR BLUEs	0.000429	4
2A_760579448	2A	760579448	Zinc EYTZN 2021 B5IR BLUEs	0.000608	3
2A_760579448	2A	760579448	Zinc EYTZN 2021 B5IR Rep 2	0.000521	3
2A_760579448	2A	760579448	Zinc YTZN 2020 B5IR Rep 2	0.000411	3
2D_19472162	2D	19472162	Zinc EYTBW 2021 all environments BLUEs	0.000718	3
2D_19472162	2D	19472162	Zinc EYTBW 2021 B2IR BLUEs	1.02e-06	3
2D_19472162	2D	19472162	Zinc EYTBW 2021 B2IR Rep 2	1.81e-06	3
3B_756626946	3B	756626946	Zinc YTBW 2020 B5IR BLUEs	9.45e-06	4
3B_756626946	3B	756626946	Zinc YTBW 2020 B5IR Rep 1	0.000298	4
3B_756626946	3B	756626946	Zinc YTBW 2020 B5IR Rep 2	2.73e-05	4
3B_756626946	3B	756626946	Zinc YTBW 2021 B5IR Rep 1	0.000161	4
4A_558059830	4A	558059830	Zinc EYTBW 2021 B2IR BLUEs	0.000487	3
4A_558059830	4A	558059830	Zinc EYTBW 2021 B2IR Rep 2	6.57e-05	3
4A_558059830	4A	558059830	Zinc EYTBW 2021 SP Rep 2	8.66e-05	3
4A_672877364	4A	672877364	Zinc YTBW 2021 B5IR BLUEs	0.000124	3
4A_672877364	4A	672877364	Zinc YTBW 2021 B5IR Rep 1	2.57e-05	3
4A_672877364	4A	672877364	Zinc YTBW 2021 B5IR Rep 2	0.000229	3
5A_585608055	5A	585608055	Zinc EYTBW 2021 all environments BLUEs	0.000147	3
5A_585608055	5A	585608055	Zinc EYTBW 2021 SP BLUEs	7.5e-05	3
5A_585608055	5A	585608055	Zinc EYTBW 2021 SP Rep 1	2.12e-05	3
5B_316011853	5B	316011853	Zinc PCZN 2018 SP Rep 1	2.11e-05	3
5B_316011853	5B	316011853	Zinc YTZN 2019 B5IR BLUEs	0.000342	3
5B_316011853	5B	316011853	Zinc YTZN 2019 B5IR Rep 1	0.00068	3
5B_571635082	5B	571635082	Zinc EYTBW 2021 SP BLUEs	1.47e-05	3
5B_571635082	5B	571635082	Zinc EYTBW 2021 SP Rep 1	0.000364	3
5B_571635082	5B	571635082	Zinc EYTBW 2021 SP Rep 2	0.000379	3
5B_586610468	5B	586610468	Zinc EYTBW 2021 SP BLUEs	0.000294	3
5B_586610468	5B	586610468	Zinc EYTBW 2021 SP Rep 1	0.000119	3
5B_586610468	5B	586610468	Zinc YTBW 2021 B5IR Rep 1	0.000102	3
5B_592792409	5B	592792409	Zinc EYTBW 2021 SP BLUEs	0.000782	3
5B_592792409	5B	592792409	Zinc EYTBW 2021 SP Rep 1	0.00074	3
5B_592792409	5B	592792409	Zinc YTZN 2021 B5IR Rep 1	0.000349	3
5D_385132035	5D	385132035	Zinc YTBW 2020 B5IR BLUEs	0.000126	3
5D_385132035	5D	385132035	Zinc YTBW 2020 B5IR Rep 1	0.000662	3
5D_385132035	5D	385132035	Zinc YTBW 2020 B5IR Rep 2	0.000439	3
6B_153561917	6B	153561917	Zinc EYTBW 2021 all environments BLUEs	0.000531	3
6B_153561917	6B	153561917	Zinc EYTBW 2021 B2IR BLUEs	0.000189	3
6B_153561917	6B	153561917	Zinc EYTBW 2021 B2IR Rep 1	0.000555	3
6B_172366330	6B	172366330	Zinc EYTBW 2021 all environments BLUEs	0.000124	3
6B_172366330	6B	172366330	Zinc EYTBW 2021 B2IR BLUEs	0.00034	3
6B_172366330	6B	172366330	Zinc EYTBW 2021 B2IR Rep 1	0.000326	3
6B_173653415	6B	173653415	Zinc EYTBW 2021 all environments BLUEs	2.69e-05	3
6B_173653415	6B	173653415	Zinc EYTBW 2021 B2IR BLUEs	0.000162	3
6B_173653415	6B	173653415	Zinc EYTBW 2021 B2IR Rep 1	0.000192	3
6B_174550372	6B	174550372	Zinc EYTBW 2021 all environments BLUEs	0.000145	3
6B_174550372	6B	174550372	Zinc EYTBW 2021 B2IR BLUEs	0.000377	3
6B_174550372	6B	174550372	Zinc EYTBW 2021 B2IR Rep 1	0.000286	3
6B_183278496	6B	183278496	Zinc EYTBW 2021 all environments BLUEs	4.81e-06	4
6B_183278496	6B	183278496	Zinc EYTBW 2021 B2IR BLUEs	5.26e-05	4
6B_183278496	6B	183278496	Zinc EYTBW 2021 B2IR Rep 1	7.08e-05	4
6B_183278496	6B	183278496	Zinc EYTBW 2021 B5IR BLUEs	0.000867	4
6B_188684286	6B	188684286	Zinc EYTBW 2021 all environments BLUEs	1.25e-05	4
6B_188684286	6B	188684286	Zinc EYTBW 2021 B2IR BLUEs	7.34e-05	4
6B_188684286	6B	188684286	Zinc EYTBW 2021 B2IR Rep 1	0.000333	4
6B_188684286	6B	188684286	Zinc EYTBW 2021 B5IR Rep 1	0.000814	4
6B_193334002	6B	193334002	Zinc EYTBW 2021 all environments BLUEs	3.58e-06	5
6B_193334002	6B	193334002	Zinc EYTBW 2021 B2IR BLUEs	9.86e-05	5
6B_193334002	6B	193334002	Zinc EYTBW 2021 B2IR Rep 1	0.000227	5
6B_193334002	6B	193334002	Zinc EYTBW 2021 B5IR BLUEs	0.000307	5
6B_193334002	6B	193334002	Zinc EYTBW 2021 B5IR Rep 1	0.000134	5
6B_204602976	6B	204602976	Zinc EYTBW 2021 all environments BLUEs	9.05e-06	5
6B_204602976	6B	204602976	Zinc EYTBW 2021 B2IR BLUEs	0.000284	5
6B_204602976	6B	204602976	Zinc EYTBW 2021 B2IR Rep 1	0.00063	5
6B_204602976	6B	204602976	Zinc EYTBW 2021 B5IR BLUEs	0.000119	5
6B_204602976	6B	204602976	Zinc EYTBW 2021 B5IR Rep 1	0.000362	5
6B_209953112	6B	209953112	Zinc EYTBW 2021 all environments BLUEs	0.000525	4
6B_209953112	6B	209953112	Zinc EYTBW 2021 B2IR BLUEs	0.000292	4
6B_209953112	6B	209953112	Zinc EYTBW 2021 B2IR Rep 1	0.00012	4
6B_209953112	6B	209953112	Zinc EYTBW 2021 B5IR Rep 1	0.000405	4
6B_226747335	6B	226747335	Zinc EYTBW 2021 all environments BLUEs	0.000982	3
6B_226747335	6B	226747335	Zinc EYTBW 2021 B2IR BLUEs	2.28e-05	3
6B_226747335	6B	226747335	Zinc EYTBW 2021 B2IR Rep 1	9.51e-06	3
6B_229054447	6B	229054447	Zinc EYTBW 2021 all environments BLUEs	2.76e-05	5
6B_229054447	6B	229054447	Zinc EYTBW 2021 B2IR BLUEs	0.000471	5
6B_229054447	6B	229054447	Zinc EYTBW 2021 B2IR Rep 1	0.000793	5
6B_229054447	6B	229054447	Zinc EYTBW 2021 B5IR BLUEs	0.000993	5
6B_229054447	6B	229054447	Zinc EYTBW 2021 B5IR Rep 1	0.000498	5
6B_235778775	6B	235778775	Zinc EYTBW 2021 all environments BLUEs	0.00017	4
6B_235778775	6B	235778775	Zinc EYTBW 2021 B2IR BLUEs	4.16e-06	4
6B_235778775	6B	235778775	Zinc EYTBW 2021 B2IR Rep 1	1.76e-06	4
6B_235778775	6B	235778775	Zinc EYTBW 2021 B5IR Rep 1	0.000467	4
6B_237914579	6B	237914579	Zinc EYTBW 2021 all environments BLUEs	0.000784	4
6B_237914579	6B	237914579	Zinc EYTBW 2021 B2IR BLUEs	0.000803	4
6B_237914579	6B	237914579	Zinc EYTBW 2021 B2IR Rep 1	0.000809	4
6B_237914579	6B	237914579	Zinc EYTBW 2021 B5IR Rep 1	0.000964	4
6B_408033582	6B	408033582	Zinc EYTBW 2021 all environments BLUEs	0.000225	3
6B_408033582	6B	408033582	Zinc EYTBW 2021 B2IR BLUEs	7.17e-05	3
6B_408033582	6B	408033582	Zinc EYTBW 2021 B2IR Rep 1	0.000148	3
6B_471154484	6B	471154484	Zinc EYTBW 2021 all environments BLUEs	0.000283	3
6B_471154484	6B	471154484	Zinc EYTBW 2021 B2IR BLUEs	0.000636	3
6B_471154484	6B	471154484	Zinc EYTBW 2021 B2IR Rep 1	0.000266	3
6D_4726489	6D	4726489	Zinc EYTBW 2021 all environments BLUEs	2.21e-05	4
6D_4726489	6D	4726489	Zinc EYTBW 2021 B2IR BLUEs	3.49e-05	4
6D_4726489	6D	4726489	Zinc EYTBW 2021 B2IR Rep 1	0.000486	4
6D_4726489	6D	4726489	Zinc EYTBW 2021 B2IR Rep 2	0.000705	4
6D_5945276	6D	5945276	Zinc combined panel B5IR % check	0.000239	4
6D_5945276	6D	5945276	Zinc EYTBW 2021 B2IR BLUEs	4.44e-05	4
6D_5945276	6D	5945276	Zinc EYTBW 2021 B2IR Rep 1	3.78e-07	4
6D_5945276	6D	5945276	Zinc YTZN 2021 B5IR BLUEs	0.000588	4
6D_8758611	6D	8758611	Zinc YTBW 2020 B5IR BLUEs	2.13e-05	3
6D_8758611	6D	8758611	Zinc YTBW 2020 B5IR Rep 1	0.000865	3
6D_8758611	6D	8758611	Zinc YTBW 2020 B5IR Rep 2	2.38e-05	3
7B_115480504	7B	115480504	Zinc EYTBW 2021 B5IR Rep 1	0.000505	4
7B_115480504	7B	115480504	Zinc YTBW 2020 B5IR BLUEs	2.27e-06	4
7B_115480504	7B	115480504	Zinc YTBW 2020 B5IR Rep 1	1.07e-05	4
7B_115480504	7B	115480504	Zinc YTBW 2020 B5IR Rep 2	4.69e-05	4
7B_119368300	7B	119368300	Zinc EYTBW 2021 B2IR BLUEs	9.36e-05	4
7B_119368300	7B	119368300	Zinc EYTBW 2021 B2IR Rep 2	0.000866	4
7B_119368300	7B	119368300	Zinc YTBW 2020 B5IR BLUEs	0.000481	4
7B_119368300	7B	119368300	Zinc YTBW 2020 B5IR Rep 1	0.000728	4
7B_121570273	7B	121570273	Zinc EYTBW 2021 B5IR Rep 1	0.000934	4
7B_121570273	7B	121570273	Zinc YTBW 2020 B5IR BLUEs	3.52e-05	4
7B_121570273	7B	121570273	Zinc YTBW 2020 B5IR Rep 1	3.4e-05	4
7B_121570273	7B	121570273	Zinc YTBW 2020 B5IR Rep 2	0.000369	4
7B_393314447	7B	393314447	Zinc EYTBW 2021 B2IR BLUEs	6.17e-06	3
7B_393314447	7B	393314447	Zinc EYTBW 2021 B2IR Rep 1	0.000387	3
7B_393314447	7B	393314447	Zinc EYTBW 2021 B2IR Rep 2	0.000135	3
7B_516450006	7B	516450006	Zinc EYTBW 2021 all environments BLUEs	0.000185	4
7B_516450006	7B	516450006	Zinc EYTBW 2021 B2IR BLUEs	5.15e-06	4
7B_516450006	7B	516450006	Zinc EYTBW 2021 B2IR Rep 1	0.000174	4
7B_516450006	7B	516450006	Zinc EYTBW 2021 B2IR Rep 2	0.000366	4
7B_520632340	7B	520632340	Zinc EYTBW 2021 all environments BLUEs	4.78e-05	4
7B_520632340	7B	520632340	Zinc EYTBW 2021 B2IR BLUEs	2.84e-07	4
7B_520632340	7B	520632340	Zinc EYTBW 2021 B2IR Rep 1	2.48e-05	4
7B_520632340	7B	520632340	Zinc EYTBW 2021 B2IR Rep 2	5.55e-05	4
7B_521279280	7B	521279280	Zinc EYTBW 2021 all environments BLUEs	0.00021	4
7B_521279280	7B	521279280	Zinc EYTBW 2021 B2IR BLUEs	1.79e-07	4
7B_521279280	7B	521279280	Zinc EYTBW 2021 B2IR Rep 1	1.3e-05	4
7B_521279280	7B	521279280	Zinc EYTBW 2021 B2IR Rep 2	4.56e-05	4
7B_523105384	7B	523105384	Zinc EYTBW 2021 all environments BLUEs	2.91e-05	4
7B_523105384	7B	523105384	Zinc EYTBW 2021 B2IR BLUEs	1.13e-07	4
7B_523105384	7B	523105384	Zinc EYTBW 2021 B2IR Rep 1	9.8e-06	4
7B_523105384	7B	523105384	Zinc EYTBW 2021 B2IR Rep 2	3.96e-05	4
7B_528946179	7B	528946179	Zinc EYTBW 2021 all environments BLUEs	0.000105	3
7B_528946179	7B	528946179	Zinc EYTBW 2021 B2IR BLUEs	3.51e-06	3
7B_528946179	7B	528946179	Zinc EYTBW 2021 B2IR Rep 2	9.84e-05	3
7B_529147819	7B	529147819	Zinc EYTBW 2021 all environments BLUEs	0.000176	4
7B_529147819	7B	529147819	Zinc EYTBW 2021 B2IR BLUEs	1.75e-06	4
7B_529147819	7B	529147819	Zinc EYTBW 2021 B2IR Rep 1	0.000536	4
7B_529147819	7B	529147819	Zinc EYTBW 2021 B2IR Rep 2	4.23e-05	4
7B_529832236	7B	529832236	Zinc EYTBW 2021 all environments BLUEs	8.81e-06	4
7B_529832236	7B	529832236	Zinc EYTBW 2021 B2IR BLUEs	3.91e-07	4
7B_529832236	7B	529832236	Zinc EYTBW 2021 B2IR Rep 1	0.000159	4
7B_529832236	7B	529832236	Zinc EYTBW 2021 B2IR Rep 2	2.39e-05	4
7B_530459507	7B	530459507	Zinc EYTBW 2021 all environments BLUEs	1.58e-05	4
7B_530459507	7B	530459507	Zinc EYTBW 2021 B2IR BLUEs	4.32e-07	4
7B_530459507	7B	530459507	Zinc EYTBW 2021 B2IR Rep 1	9.32e-05	4
7B_530459507	7B	530459507	Zinc EYTBW 2021 B2IR Rep 2	4.2e-05	4
7B_530585647	7B	530585647	Zinc EYTBW 2021 all environments BLUEs	3e-06	6
7B_530585647	7B	530585647	Zinc EYTBW 2021 B2IR BLUEs	9.11e-08	6
7B_530585647	7B	530585647	Zinc EYTBW 2021 B2IR Rep 1	1.32e-05	6
7B_530585647	7B	530585647	Zinc EYTBW 2021 B2IR Rep 2	1.49e-05	6
7B_530585647	7B	530585647	Zinc EYTBW 2021 SP BLUEs	0.000741	6
7B_530585647	7B	530585647	Zinc EYTBW 2021 SP Rep 2	0.000999	6
7B_539879402	7B	539879402	Zinc EYTBW 2021 all environments BLUEs	0.000368	4
7B_539879402	7B	539879402	Zinc EYTBW 2021 B2IR BLUEs	7.43e-08	4
7B_539879402	7B	539879402	Zinc EYTBW 2021 B2IR Rep 1	2.28e-05	4
7B_539879402	7B	539879402	Zinc EYTBW 2021 B2IR Rep 2	1.36e-05	4
7B_539879737	7B	539879737	Zinc EYTBW 2021 all environments BLUEs	0.000781	4
7B_539879737	7B	539879737	Zinc EYTBW 2021 B2IR BLUEs	4.48e-08	4
7B_539879737	7B	539879737	Zinc EYTBW 2021 B2IR Rep 1	1.24e-05	4
7B_539879737	7B	539879737	Zinc EYTBW 2021 B2IR Rep 2	1.12e-05	4
7B_541485456	7B	541485456	Zinc EYTBW 2021 B2IR BLUEs	1.05e-05	3
7B_541485456	7B	541485456	Zinc EYTBW 2021 B2IR Rep 1	0.000513	3
7B_541485456	7B	541485456	Zinc EYTBW 2021 B2IR Rep 2	0.000812	3
7B_541697492	7B	541697492	Zinc EYTBW 2021 B2IR BLUEs	3.08e-08	3
7B_541697492	7B	541697492	Zinc EYTBW 2021 B2IR Rep 1	1.12e-05	3
7B_541697492	7B	541697492	Zinc EYTBW 2021 B2IR Rep 2	5.86e-06	3
7B_544032561	7B	544032561	Zinc EYTBW 2021 all environments BLUEs	0.000308	4
7B_544032561	7B	544032561	Zinc EYTBW 2021 B2IR BLUEs	5.97e-08	4
7B_544032561	7B	544032561	Zinc EYTBW 2021 B2IR Rep 1	3.38e-05	4
7B_544032561	7B	544032561	Zinc EYTBW 2021 B2IR Rep 2	9.79e-06	4
7B_545991219	7B	545991219	Zinc EYTBW 2021 all environments BLUEs	0.000102	4
7B_545991219	7B	545991219	Zinc EYTBW 2021 B2IR BLUEs	1.79e-08	4
7B_545991219	7B	545991219	Zinc EYTBW 2021 B2IR Rep 1	5.85e-06	4
7B_545991219	7B	545991219	Zinc EYTBW 2021 B2IR Rep 2	6.48e-06	4
7B_547714243	7B	547714243	Zinc EYTBW 2021 B2IR BLUEs	6.34e-06	3
7B_547714243	7B	547714243	Zinc EYTBW 2021 B2IR Rep 1	0.000376	3
7B_547714243	7B	547714243	Zinc EYTBW 2021 B2IR Rep 2	0.000195	3
7B_549230804	7B	549230804	Zinc EYTBW 2021 B2IR BLUEs	2.01e-06	3
7B_549230804	7B	549230804	Zinc EYTBW 2021 B2IR Rep 1	0.000184	3
7B_549230804	7B	549230804	Zinc EYTBW 2021 B2IR Rep 2	0.000122	3
7B_555712338	7B	555712338	Zinc EYTBW 2021 B2IR BLUEs	1.88e-05	3
7B_555712338	7B	555712338	Zinc EYTBW 2021 B2IR Rep 2	8.48e-05	3
7B_555712338	7B	555712338	Zinc YTBW 2021 B5IR BLUEs	0.000399	3
7B_557354467	7B	557354467	Zinc EYTBW 2021 B2IR BLUEs	0.000107	3
7B_557354467	7B	557354467	Zinc EYTBW 2021 B2IR Rep 2	0.000566	3
7B_557354467	7B	557354467	Zinc YTBW 2021 B5IR BLUEs	0.000221	3
7B_558326652	7B	558326652	Zinc EYTBW 2021 B2IR BLUEs	5.37e-07	3
7B_558326652	7B	558326652	Zinc EYTBW 2021 B2IR Rep 1	0.00083	3
7B_558326652	7B	558326652	Zinc EYTBW 2021 B2IR Rep 2	1.54e-05	3
7B_559631849	7B	559631849	Zinc EYTBW 2021 B2IR BLUEs	2.49e-05	3
7B_559631849	7B	559631849	Zinc EYTBW 2021 B2IR Rep 2	0.000462	3
7B_559631849	7B	559631849	Zinc YTBW 2021 B5IR BLUEs	0.000874	3
7B_559924996	7B	559924996	Zinc EYTBW 2021 B2IR BLUEs	0.000156	3
7B_559924996	7B	559924996	Zinc EYTBW 2021 B2IR Rep 2	0.000657	3
7B_559924996	7B	559924996	Zinc YTBW 2021 B5IR BLUEs	0.000492	3
7B_560802461	7B	560802461	Zinc EYTBW 2021 all environments BLUEs	0.00014	6
7B_560802461	7B	560802461	Zinc EYTBW 2021 B2IR BLUEs	5.68e-06	6
7B_560802461	7B	560802461	Zinc EYTBW 2021 B2IR Rep 1	0.000217	6
7B_560802461	7B	560802461	Zinc EYTBW 2021 B2IR Rep 2	0.000653	6
7B_560802461	7B	560802461	Zinc EYTBW 2021 SP Rep 1	0.000769	6
7B_560802461	7B	560802461	Zinc YTBW 2021 B5IR BLUEs	0.000111	6
7B_561277280	7B	561277280	Zinc EYTBW 2021 B2IR BLUEs	5.3e-05	3
7B_561277280	7B	561277280	Zinc EYTBW 2021 B2IR Rep 2	0.000664	3
7B_561277280	7B	561277280	Zinc YTBW 2021 B5IR BLUEs	0.000705	3
7B_561280142	7B	561280142	Zinc EYTBW 2021 B2IR BLUEs	0.000102	3
7B_561280142	7B	561280142	Zinc EYTBW 2021 B2IR Rep 2	0.000235	3
7B_561280142	7B	561280142	Zinc YTBW 2021 B5IR BLUEs	0.000112	3
7B_564053220	7B	564053220	Zinc EYTBW 2021 B2IR BLUEs	6.58e-05	3
7B_564053220	7B	564053220	Zinc EYTBW 2021 B2IR Rep 2	0.000756	3
7B_564053220	7B	564053220	Zinc YTBW 2021 B5IR BLUEs	0.000301	3
7B_565054902	7B	565054902	Zinc EYTBW 2021 B2IR BLUEs	1.25e-05	3
7B_565054902	7B	565054902	Zinc EYTBW 2021 B2IR Rep 2	0.000524	3
7B_565054902	7B	565054902	Zinc YTBW 2021 B5IR BLUEs	0.000575	3
7B_570182044	7B	570182044	Zinc EYTBW 2021 B2IR BLUEs	3.2e-05	3
7B_570182044	7B	570182044	Zinc EYTBW 2021 B2IR Rep 2	0.000256	3
7B_570182044	7B	570182044	Zinc YTBW 2021 B5IR BLUEs	0.000554	3
7B_571588916	7B	571588916	Zinc EYTBW 2021 B2IR BLUEs	7.47e-05	3
7B_571588916	7B	571588916	Zinc EYTBW 2021 B2IR Rep 2	0.000551	3
7B_571588916	7B	571588916	Zinc YTBW 2021 B5IR BLUEs	0.000262	3
7B_572421910	7B	572421910	Zinc EYTBW 2021 B2IR BLUEs	5.91e-06	3
7B_572421910	7B	572421910	Zinc EYTBW 2021 B2IR Rep 1	0.000173	3
7B_572421910	7B	572421910	Zinc EYTBW 2021 B2IR Rep 2	0.000252	3

## Sheet: Table S6
Marker	p-values	Additive effects	Percentage variation explained
1A_4159194	2.5E-04 - 8.7E-04	0.83 - 0.88 ppm	1.3 - 1.6%
1A_89590707	1.3E-04 - 6.6E-04	1.39 - 1.54 ppm	1.4 - 1.7%
1B_634242993	1.0E-05 - 8.5E-04	0.53 - 0.53 ppm	1.3 - 7.3%
2A_428372781	2.4E-04 - 6.1E-04	0.09 - 1.74 ppm	1.4 - 6.2%
2A_760579448	4.1E-04 - 6.1E-04	0.84 - 1.1 ppm	5.5 - 5.8%
2D_19472162	1.0E-06 - 7.2E-04	0.43 - 0.85 ppm	1.3 - 2.7%
3B_756626946	9.5E-06 - 3.0E-04	1.3 - 1.61 ppm	1.6 - 2.2%
4A_558059830	6.6E-05 - 4.9E-04	0.22 - 0.46 ppm	1.5 - 1.9%
4A_672877364	2.6E-05 - 2.3E-04	0.51 - 0.71 ppm	1.6 - 2%
5A_585608055	2.1E-05 - 1.5E-04	0.09 - 0.32 ppm	1.6 - 2.1%
5B_316011853	2.1E-05 - 6.8E-04	0.18 - 0.56 ppm	1.4 - 2%
5B_571635082	1.5E-05 - 3.8E-04	0.66 - 0.76 ppm	1.5 - 2.1%
5B_586610468	1.0E-04 - 2.9E-04	0.46 - 0.64 ppm	1.5 - 1.7%
5B_592792409	3.5E-04 - 7.8E-04	0.4 - 1.01 ppm	1.3 - 3%
5D_385132035	1.3E-04 - 6.6E-04	1.02 - 1.1 ppm	1.4 - 1.7%
6B_153561917	1.9E-04 - 5.6E-04	0.3 - 0.4 ppm	1.4 - 1.6%
6B_172366330	1.2E-04 - 3.4E-04	0.33 - 0.44 ppm	1.5 - 1.6%
6B_173653415	2.7E-05 - 1.9E-04	0.36 - 0.45 ppm	1.7 - 1.9%
6B_174550372	1.5E-04 - 3.8E-04	0.34 - 0.44 ppm	1.5 - 1.6%
6B_183278496	4.8E-06 - 8.7E-04	0.37 - 0.44 ppm	1.3 - 2.2%
6B_188684286	1.3E-05 - 8.1E-04	0.36 - 0.52 ppm	1.4 - 2.1%
6B_193334002	3.6E-06 - 3.1E-04	0.38 - 0.58 ppm	1.5 - 2.3%
6B_204602976	9.1E-06 - 6.3E-04	0.36 - 0.55 ppm	1.4 - 2.1%
6B_209953112	1.2E-04 - 5.3E-04	0.29 - 0.54 ppm	1.4 - 1.8%
6B_226747335	9.5E-06 - 9.8E-04	0.26 - 0.42 ppm	1.3 - 2.3%
6B_229054447	2.8E-05 - 9.9E-04	0.35 - 0.52 ppm	1.3 - 1.9%
6B_235778775	1.8E-06 - 4.7E-04	0.28 - 0.55 ppm	1.5 - 2.6%
6B_237914579	7.8E-04 - 9.6E-04	0.27 - 0.48 ppm	1.3 - 1.4%
6B_408033582	7.2E-05 - 2.3E-04	0.25 - 0.29 ppm	1.5 - 1.8%
6B_471154484	2.7E-04 - 6.4E-04	0.32 - 0.39 ppm	1.4 - 1.6%
6D_4726489	2.2E-05 - 7.1E-04	0.27 - 0.57 ppm	1.4 - 2%
6D_5945276	3.8E-07 - 5.9E-04	0.51 - 0.95 ppm	0.6 - 2.9%
6D_8758611	2.1E-05 - 8.7E-04	0.87 - 1.11 ppm	1.4 - 2%
7B_115480504	2.3E-06 - 5.1E-04	0.07 - 0.71 ppm	1.5 - 2.5%
7B_119368300	9.4E-05 - 8.7E-04	0.39 - 0.96 ppm	1.4 - 1.8%
7B_121570273	3.4E-05 - 9.3E-04	0.66 - 1.08 ppm	1.3 - 2%
7B_393314447	6.2E-06 - 3.9E-04	0.39 - 0.53 ppm	1.5 - 2.3%
7B_516450006	5.2E-06 - 3.7E-04	0.6 - 0.86 ppm	1.5 - 2.4%
7B_520632340	2.8E-07 - 5.6E-05	0.46 - 0.68 ppm	1.8 - 2.9%
7B_521279280	1.8E-07 - 2.1E-04	0.44 - 0.71 ppm	1.5 - 3%
7B_523105384	1.1E-07 - 4.0E-05	0.46 - 0.71 ppm	1.9 - 3.1%
7B_528946179	3.5E-06 - 1.1E-04	0.64 - 0.93 ppm	1.7 - 2.4%
7B_529147819	1.8E-06 - 5.4E-04	0.59 - 1 ppm	1.5 - 2.6%
7B_529832236	3.9E-07 - 1.6E-04	0.71 - 0.98 ppm	1.7 - 2.9%
7B_530459507	4.3E-07 - 9.3E-05	0.72 - 1 ppm	1.8 - 2.8%
7B_530585647	9.1E-08 - 1.0E-03		1 - 2.8%
7B_539879402	7.4E-08 - 3.7E-04	0.42 - 0.71 ppm	1.4 - 3.2%
7B_539879737	4.5E-08 - 7.8E-04	0.39 - 0.72 ppm	1.3 - 3.3%
7B_541485456	1.1E-05 - 8.1E-04	0.51 - 0.53 ppm	1.4 - 2.2%
7B_541697492	3.1E-08 - 1.1E-05	0.69 - 0.7 ppm	2.2 - 3.4%
7B_544032561	6.0E-08 - 3.1E-04	0.39 - 0.72 ppm	1.5 - 3.2%
7B_545991219	1.8E-08 - 1.0E-04	0.41 - 0.72 ppm	1.7 - 3.5%
7B_547714243	6.3E-06 - 3.8E-04		1.2 - 2%
7B_549230804	2.0E-06 - 1.8E-04	0.54 - 0.6 ppm	1.7 - 2.5%
7B_555712338	1.9E-05 - 4.0E-04	0.88 - 0.88 ppm	1.5 - 1.8%
7B_557354467	1.1E-04 - 5.7E-04	0.57 - 0.89 ppm	1.5 - 1.8%
7B_558326652	5.4E-07 - 8.3E-04	0.5 - 0.64 ppm	1.4 - 2.8%
7B_559631849	2.5E-05 - 8.7E-04	0.58 - 0.84 ppm	1.3 - 2%
7B_559924996	1.6E-04 - 6.6E-04	0.57 - 0.86 ppm	1.4 - 1.7%
7B_560802461	5.7E-06 - 7.7E-04	0.27 - 0.97 ppm	1.4 - 2.3%
7B_561277280	5.3E-05 - 7.1E-04	0.62 - 0.84 ppm	1.4 - 1.9%
7B_561280142	1.0E-04 - 2.4E-04	0.54 - 0.93 ppm	1.6 - 1.8%
7B_564053220	6.6E-05 - 7.6E-04	0.62 - 0.87 ppm	1.4 - 1.9%
7B_565054902	1.3E-05 - 5.8E-04	0.58 - 0.87 ppm	1.4 - 2.2%
7B_570182044	3.2E-05 - 5.5E-04	0.62 - 0.79 ppm	1.4 - 2%
7B_571588916	7.5E-05 - 5.5E-04	0.6 - 0.85 ppm	1.5 - 1.8%
7B_572421910	5.9E-06 - 2.5E-04	0.49 - 0.51 ppm	1.6 - 2.3%

## Sheet: Table S7
Marker	Chr	Pos	Dataset	p-value	Significant in number of datasets
1A_551428126	1A	551428126	Iron EYTBW 2021 all environments BLUEs	0.00016	3
1A_551428126	1A	551428126	Iron EYTBW 2021 B5IR BLUEs	0.000112	3
1A_551428126	1A	551428126	Iron EYTBW 2021 B5IR Rep 1	6.18e-05	3
1A_557314695	1A	557314695	Iron EYTBW 2021 all environments BLUEs	0.00042	3
1A_557314695	1A	557314695	Iron YTBW 2020 B5IR BLUEs	0.000205	3
1A_557314695	1A	557314695	Iron YTBW 2020 B5IR Rep 1	4.65e-05	3
1A_558541135	1A	558541135	Iron combined panel B5IR % check	0.000749	3
1A_558541135	1A	558541135	Iron EYTBW 2021 B5IR BLUEs	0.000353	3
1A_558541135	1A	558541135	Iron YTBW 2020 B5IR Rep 1	0.000343	3
1B_625077030	1B	625077030	Iron EYTBW 2021 all environments BLUEs	8.55e-05	3
1B_625077030	1B	625077030	Iron EYTBW 2021 B2IR BLUEs	5.16e-05	3
1B_625077030	1B	625077030	Iron EYTBW 2021 B2IR Rep 2	0.000471	3
1B_625232015	1B	625232015	Iron EYTBW 2021 all environments BLUEs	1.97e-05	3
1B_625232015	1B	625232015	Iron EYTBW 2021 B2IR BLUEs	7.52e-06	3
1B_625232015	1B	625232015	Iron EYTBW 2021 B2IR Rep 2	0.00047	3
1B_631257174	1B	631257174	Iron EYTBW 2021 all environments BLUEs	0.000239	3
1B_631257174	1B	631257174	Iron EYTBW 2021 B2IR BLUEs	2.29e-10	3
1B_631257174	1B	631257174	Iron EYTBW 2021 B2IR Rep 1	1.56e-18	3
1B_636840957	1B	636840957	Iron EYTBW 2021 all environments BLUEs	0.000206	3
1B_636840957	1B	636840957	Iron EYTBW 2021 B5IR BLUEs	0.000999	3
1B_636840957	1B	636840957	Iron EYTBW 2021 B5IR Rep 1	6.98e-05	3
1B_637901362	1B	637901362	Iron EYTBW 2021 all environments BLUEs	2.13e-05	3
1B_637901362	1B	637901362	Iron EYTBW 2021 B2IR BLUEs	3.1e-05	3
1B_637901362	1B	637901362	Iron EYTBW 2021 B2IR Rep 2	0.00033	3
1B_638944475	1B	638944475	Iron EYTBW 2021 all environments BLUEs	6.52e-05	5
1B_638944475	1B	638944475	Iron EYTBW 2021 B2IR BLUEs	0.00015	5
1B_638944475	1B	638944475	Iron EYTBW 2021 B2IR Rep 2	0.000218	5
1B_638944475	1B	638944475	Iron EYTBW 2021 B5IR BLUEs	0.000877	5
1B_638944475	1B	638944475	Iron YTBW 2021 B5IR Rep 2	0.000935	5
1B_641131482	1B	641131482	Iron EYTBW 2021 all environments BLUEs	0.000855	3
1B_641131482	1B	641131482	Iron EYTBW 2021 B2IR BLUEs	0.000113	3
1B_641131482	1B	641131482	Iron EYTBW 2021 B2IR Rep 2	0.000375	3
1D_2430803	1D	2430803	Iron EYTBW 2021 all environments BLUEs	6.68e-05	4
1D_2430803	1D	2430803	Iron EYTBW 2021 B5IR Rep 1	0.000463	4
1D_2430803	1D	2430803	Iron EYTBW 2021 SP BLUEs	0.000186	4
1D_2430803	1D	2430803	Iron EYTBW 2021 SP Rep 2	6.38e-05	4
2A_755740567	2A	755740567	Iron EYTBW 2021 all environments BLUEs	7.69e-05	3
2A_755740567	2A	755740567	Iron EYTBW 2021 SP BLUEs	0.000149	3
2A_755740567	2A	755740567	Iron EYTBW 2021 SP Rep 1	0.000703	3
2A_770713812	2A	770713812	Iron EYTBW 2021 all environments BLUEs	0.000119	3
2A_770713812	2A	770713812	Iron EYTBW 2021 SP BLUEs	0.000236	3
2A_770713812	2A	770713812	Iron EYTBW 2021 SP Rep 1	1.6e-05	3
2B_242990335	2B	242990335	Iron EYTBW 2021 SP BLUEs	3.63e-08	3
2B_242990335	2B	242990335	Iron EYTBW 2021 SP Rep 1	4.9e-05	3
2B_242990335	2B	242990335	Iron EYTBW 2021 SP Rep 2	1.92e-06	3
2D_69242948	2D	69242948	Iron YTBW 2020 B5IR BLUEs	3.64e-06	3
2D_69242948	2D	69242948	Iron YTBW 2020 B5IR Rep 1	0.000197	3
2D_69242948	2D	69242948	Iron YTBW 2020 B5IR Rep 2	0.000158	3
2D_284570413	2D	284570413	Iron combined panel B5IR % check	1.5e-05	5
2D_284570413	2D	284570413	Iron EYTBW 2021 all environments BLUEs	0.000792	5
2D_284570413	2D	284570413	Iron EYTZN 2020 B5IR Rep 1	0.000292	5
2D_284570413	2D	284570413	Iron YTBW 2020 B5IR BLUEs	4.75e-06	5
2D_284570413	2D	284570413	Iron YTBW 2020 B5IR Rep 1	5.75e-06	5
2D_286384945	2D	286384945	Iron combined panel B5IR % check	0.000112	7
2D_286384945	2D	286384945	Iron EYTBW 2021 all environments BLUEs	0.000335	7
2D_286384945	2D	286384945	Iron YTBW 2020 B5IR BLUEs	2.19e-05	7
2D_286384945	2D	286384945	Iron YTBW 2020 B5IR Rep 1	5.34e-06	7
2D_286384945	2D	286384945	Iron YTBW 2021 B5IR Rep 1	0.000671	7
2D_286384945	2D	286384945	Iron YTZN 2019 B5IR BLUEs	7.81e-05	7
2D_286384945	2D	286384945	Iron YTZN 2019 B5IR Rep 1	8.97e-05	7
2D_290559279	2D	290559279	Iron EYTBW 2021 all environments BLUEs	0.000413	3
2D_290559279	2D	290559279	Iron YTBW 2020 B5IR BLUEs	9.95e-06	3
2D_290559279	2D	290559279	Iron YTBW 2020 B5IR Rep 1	3.66e-06	3
3B_794884822	3B	794884822	Iron EYTBW 2021 all environments BLUEs	0.000508	3
3B_794884822	3B	794884822	Iron EYTBW 2021 B2IR BLUEs	5.13e-06	3
3B_794884822	3B	794884822	Iron EYTBW 2021 B2IR Rep 2	0.000157	3
3D_177038832	3D	177038832	Iron EYTBW 2021 all environments BLUEs	0.0002	5
3D_177038832	3D	177038832	Iron EYTBW 2021 B2IR BLUEs	0.000128	5
3D_177038832	3D	177038832	Iron EYTBW 2021 B2IR Rep 1	0.000351	5
3D_177038832	3D	177038832	Iron YTBW 2020 B5IR BLUEs	7.45e-05	5
3D_177038832	3D	177038832	Iron YTBW 2020 B5IR Rep 1	0.000209	5
4A_646730848	4A	646730848	Iron EYTBW 2021 all environments BLUEs	0.000401	3
4A_646730848	4A	646730848	Iron EYTBW 2021 B5IR BLUEs	0.000364	3
4A_646730848	4A	646730848	Iron EYTBW 2021 B5IR Rep 2	0.000397	3
4B_20567798	4B	20567798	Iron combined panel B5IR % check	0.000293	3
4B_20567798	4B	20567798	Iron YTZN 2019 B5IR Rep 1	0.000685	3
4B_20567798	4B	20567798	Iron YTZN 2019 B5IR Rep 3	0.00043	3
4B_21378087	4B	21378087	Iron EYTBW 2021 all environments BLUEs	0.00034	4
4B_21378087	4B	21378087	Iron YTBW 2020 B5IR BLUEs	9.36e-07	4
4B_21378087	4B	21378087	Iron YTBW 2020 B5IR Rep 1	2.18e-05	4
4B_21378087	4B	21378087	Iron YTBW 2020 B5IR Rep 2	0.000182	4
4B_21379808	4B	21379808	Iron EYTBW 2021 all environments BLUEs	0.000647	6
4B_21379808	4B	21379808	Iron EYTBW 2021 B5IR BLUEs	0.00063	6
4B_21379808	4B	21379808	Iron EYTBW 2021 B5IR Rep 2	0.000595	6
4B_21379808	4B	21379808	Iron YTBW 2020 B5IR BLUEs	1.08e-06	6
4B_21379808	4B	21379808	Iron YTBW 2020 B5IR Rep 1	5.11e-05	6
4B_21379808	4B	21379808	Iron YTBW 2020 B5IR Rep 2	0.000102	6
4D_360914337	4D	360914337	Iron EYTBW 2021 all environments BLUEs	6.31e-05	3
4D_360914337	4D	360914337	Iron EYTBW 2021 B5IR BLUEs	0.000153	3
4D_360914337	4D	360914337	Iron EYTBW 2021 B5IR Rep 2	0.000878	3
5A_6960731	5A	6960731	Iron EYTBW 2021 all environments BLUEs	0.000251	3
5A_6960731	5A	6960731	Iron EYTBW 2021 B5IR BLUEs	7.77e-05	3
5A_6960731	5A	6960731	Iron EYTBW 2021 B5IR Rep 2	0.000292	3
5B_41097371	5B	41097371	Iron EYTBW 2021 all environments BLUEs	0.000391	3
5B_41097371	5B	41097371	Iron EYTBW 2021 B2IR BLUEs	0.000884	3
5B_41097371	5B	41097371	Iron EYTBW 2021 B2IR Rep 2	0.000289	3
5D_433017840	5D	433017840	Iron EYTZN 2021 B5IR BLUEs	3.46e-05	3
5D_433017840	5D	433017840	Iron EYTZN 2021 B5IR Rep 1	0.000483	3
5D_433017840	5D	433017840	Iron EYTZN 2021 B5IR Rep 2	0.000794	3
6A_61080142	6A	61080142	Iron EYTBW 2021 B5IR BLUEs	0.000587	3
6A_61080142	6A	61080142	Iron EYTBW 2021 B5IR Rep 1	0.000352	3
6A_61080142	6A	61080142	Iron YTZN 2020 B5IR Rep 2	0.000416	3
7A_65360952	7A	65360952	Iron EYTBW 2021 all environments BLUEs	0.000305	3
7A_65360952	7A	65360952	Iron EYTBW 2021 SP BLUEs	0.00032	3
7A_65360952	7A	65360952	Iron EYTBW 2021 SP Rep 1	0.000704	3
7A_68211963	7A	68211963	Iron EYTBW 2021 all environments BLUEs	0.000178	3
7A_68211963	7A	68211963	Iron EYTBW 2021 SP BLUEs	0.000154	3
7A_68211963	7A	68211963	Iron EYTBW 2021 SP Rep 1	0.000372	3
7A_68774152	7A	68774152	Iron EYTBW 2021 all environments BLUEs	0.00016	3
7A_68774152	7A	68774152	Iron EYTBW 2021 SP BLUEs	0.000357	3
7A_68774152	7A	68774152	Iron EYTBW 2021 SP Rep 1	0.000931	3
7A_69311409	7A	69311409	Iron EYTBW 2021 all environments BLUEs	0.000363	3
7A_69311409	7A	69311409	Iron EYTBW 2021 SP BLUEs	0.000611	3
7A_69311409	7A	69311409	Iron EYTBW 2021 SP Rep 1	0.00059	3
7A_70208197	7A	70208197	Iron EYTBW 2021 all environments BLUEs	0.000244	3
7A_70208197	7A	70208197	Iron EYTBW 2021 SP BLUEs	0.000235	3
7A_70208197	7A	70208197	Iron EYTBW 2021 SP Rep 1	0.000868	3
7A_232523043	7A	232523043	Iron EYTBW 2021 B2IR BLUEs	9.34e-06	3
7A_232523043	7A	232523043	Iron EYTBW 2021 B2IR Rep 1	0.000622	3
7A_232523043	7A	232523043	Iron EYTBW 2021 B2IR Rep 2	0.00062	3
7A_495927542	7A	495927542	Iron EYTBW 2021 B2IR BLUEs	5.82e-06	3
7A_495927542	7A	495927542	Iron EYTBW 2021 B2IR Rep 1	0.000177	3
7A_495927542	7A	495927542	Iron EYTBW 2021 B2IR Rep 2	0.00019	3
7A_596685453	7A	596685453	Iron EYTBW 2021 B2IR BLUEs	1.33e-05	3
7A_596685453	7A	596685453	Iron EYTBW 2021 B2IR Rep 1	0.000722	3
7A_596685453	7A	596685453	Iron EYTBW 2021 B2IR Rep 2	0.000696	3
7A_600556352	7A	600556352	Iron EYTBW 2021 B2IR BLUEs	9.61e-06	3
7A_600556352	7A	600556352	Iron EYTBW 2021 B2IR Rep 1	0.000128	3
7A_600556352	7A	600556352	Iron EYTBW 2021 B2IR Rep 2	0.000779	3
7B_66021438	7B	66021438	Iron EYTBW 2021 all environments BLUEs	0.000393	3
7B_66021438	7B	66021438	Iron EYTBW 2021 B2IR BLUEs	0.000761	3
7B_66021438	7B	66021438	Iron EYTBW 2021 B2IR Rep 1	0.000129	3
7B_126740591	7B	126740591	Iron EYTBW 2021 all environments BLUEs	0.000902	3
7B_126740591	7B	126740591	Iron EYTBW 2021 B2IR BLUEs	0.000395	3
7B_126740591	7B	126740591	Iron EYTBW 2021 B2IR Rep 2	0.000224	3
7B_131073897	7B	131073897	Iron EYTBW 2021 B2IR BLUEs	0.000275	3
7B_131073897	7B	131073897	Iron EYTBW 2021 B2IR Rep 2	0.000642	3
7B_131073897	7B	131073897	Iron YTZN 2020 B5IR Rep 2	0.000449	3
7B_131374909	7B	131374909	Iron EYTBW 2021 all environments BLUEs	0.00074	3
7B_131374909	7B	131374909	Iron EYTBW 2021 B2IR BLUEs	0.000321	3
7B_131374909	7B	131374909	Iron EYTBW 2021 B2IR Rep 2	0.000213	3
7B_168075214	7B	168075214	Iron EYTBW 2021 all environments BLUEs	0.000428	3
7B_168075214	7B	168075214	Iron EYTBW 2021 B2IR BLUEs	0.000258	3
7B_168075214	7B	168075214	Iron EYTBW 2021 B2IR Rep 2	0.000971	3
7B_196275863	7B	196275863	Iron EYTBW 2021 all environments BLUEs	0.000972	3
7B_196275863	7B	196275863	Iron EYTBW 2021 B2IR BLUEs	8.53e-06	3
7B_196275863	7B	196275863	Iron EYTBW 2021 B2IR Rep 1	1.76e-05	3
7B_377008881	7B	377008881	Iron EYTBW 2021 all environments BLUEs	0.000217	3
7B_377008881	7B	377008881	Iron EYTBW 2021 B2IR BLUEs	4.87e-05	3
7B_377008881	7B	377008881	Iron EYTBW 2021 B2IR Rep 2	0.000169	3

## Sheet: Table S8
Marker	p-values	Additive effects	Percentage variation explained
1A_551428126	6.2E-05 - 1.6E-04	0.19 - 0.3 ppm	1.6 - 1.9%
1A_557314695	4.7E-05 - 4.2E-04	0.2 - 0.38 ppm	1.4 - 1.9%
1A_558541135	3.4E-04 - 7.5E-04	0.27 - 1.26 ppm	0.6 - 1.5%
1B_625077030	5.2E-05 - 4.7E-04		1.2 - 1.6%
1B_625232015	7.5E-06 - 4.7E-04	0.53 - 0.76 ppm	1.5 - 2.3%
1B_631257174	1.6E-18 - 2.4E-04	0.19 - 0.36 ppm	1.5 - 8.3%
1B_636840957	7.0E-05 - 1.0E-03	0.11 - 0.15 ppm	1.3 - 1.8%
1B_637901362	2.1E-05 - 3.3E-04		1.3 - 1.7%
1B_638944475	6.5E-05 - 9.4E-04	0.44 - 0.84 ppm	1.3 - 1.8%
1B_641131482	1.1E-04 - 8.6E-04		1 - 1.4%
1D_2430803	6.4E-05 - 4.6E-04	0.4 - 0.8 ppm	1.5 - 1.9%
2A_755740567	7.7E-05 - 7.0E-04	0.24 - 0.42 ppm	1.4 - 1.7%
2A_770713812	1.6E-05 - 2.4E-04	0.3 - 0.7 ppm	1.6 - 2.1%
2B_242990335	3.6E-08 - 4.9E-05	0.04 - 0.28 ppm	1.9 - 3.3%
2D_69242948	3.6E-06 - 2.0E-04	0.26 - 0.35 ppm	1.6 - 2.3%
2D_284570413	4.8E-06 - 7.9E-04	0.87 - 0.87 ppm	0.9 - 5.7%
2D_286384945	5.3E-06 - 6.7E-04	0.27 - 0.79 ppm	0.7 - 2.3%
2D_290559279	3.7E-06 - 4.1E-04	0.22 - 0.45 ppm	1.4 - 2.4%
3B_794884822	5.1E-06 - 5.1E-04	0.14 - 0.24 ppm	1.4 - 2.4%
3D_177038832	7.5E-05 - 3.5E-04	0.22 - 0.4 ppm	1.6 - 1.8%
4A_646730848	3.6E-04 - 4.0E-04	0.16 - 0.41 ppm	1.4 - 1.5%
4B_20567798	2.9E-04 - 6.9E-04	0.44 - 0.95 ppm	0.6 - 1.4%
4B_21378087	9.4E-07 - 3.4E-04	0.21 - 0.42 ppm	1.5 - 2.6%
4B_21379808	1.1E-06 - 6.5E-04	0.19 - 0.43 ppm	1.4 - 2.6%
4D_360914337	6.3E-05 - 8.8E-04	0.19 - 0.29 ppm	1.4 - 1.8%
5A_6960731	7.8E-05 - 2.9E-04	0.21 - 0.41 ppm	1.5 - 1.8%
5B_41097371	2.9E-04 - 8.8E-04	0.25 - 0.39 ppm	1.4 - 1.6%
5D_433017840	3.5E-05 - 7.9E-04		4.2 - 6.4%
6A_61080142	3.5E-04 - 5.9E-04	0.49 - 0.62 ppm	1.4 - 4.7%
7A_65360952	3.1E-04 - 7.0E-04	0.28 - 0.51 ppm	1.4 - 1.5%
7A_68211963	1.5E-04 - 3.7E-04	0.28 - 0.53 ppm	1.5 - 1.7%
7A_68774152	1.6E-04 - 9.3E-04	0.27 - 0.52 ppm	1.3 - 1.6%
7A_69311409	3.6E-04 - 6.1E-04	0.26 - 0.49 ppm	1.4 - 1.5%
7A_70208197	2.4E-04 - 8.7E-04	0.28 - 0.52 ppm	1.4 - 1.6%
7A_232523043	9.3E-06 - 6.2E-04	0.28 - 0.31 ppm	1.4 - 2.2%
7A_495927542	5.8E-06 - 1.9E-04	0.35 - 0.4 ppm	1.7 - 2.3%
7A_596685453	1.3E-05 - 7.2E-04	0.21 - 0.27 ppm	1.4 - 2.2%
7A_600556352	9.6E-06 - 7.8E-04	0.2 - 0.3 ppm	1.4 - 2.2%
7B_66021438	1.3E-04 - 7.6E-04	0.17 - 0.37 ppm	1.4 - 1.8%
7B_126740591	2.2E-04 - 9.0E-04	0.34 - 0.6 ppm	1.3 - 1.6%
7B_131073897	2.8E-04 - 6.4E-04	0.5 - 0.6 ppm	1.4 - 5.8%
7B_131374909	2.1E-04 - 7.4E-04	0.34 - 0.63 ppm	1.3 - 1.7%
7B_168075214	2.6E-04 - 9.7E-04	0.39 - 0.6 ppm	1.4 - 1.6%
7B_196275863	8.5E-06 - 9.7E-04	0.31 - 0.46 ppm	1.3 - 2.3%
7B_377008881	4.9E-05 - 2.2E-04	0.43 - 0.77 ppm	1.6 - 1.9%

## Sheet: Table S9
Marker	Chr	Pos	Dataset	p-value	Significant in number of datasets
1A_536664231	1A	536664231	Iron EYTBW 2021 B2IR BLUEs	0.000837	3
1A_536664231	1A	536664231	Iron YTBW 2020 B5IR Rep 1	0.000958	3
1A_536664231	1A	536664231	Zinc EYTBW 2021 B5IR Rep 1	0.000445	3
1A_570615890	1A	570615890	Iron EYTBW 2021 all environments BLUEs	0.000844	4
1A_570615890	1A	570615890	Iron YTBW 2020 B5IR BLUEs	0.000884	4
1A_570615890	1A	570615890	Iron YTBW 2020 B5IR Rep 1	0.000383	4
1A_570615890	1A	570615890	Zinc EYTBW 2021 B5IR Rep 2	0.000407	4
1B_635977848	1B	635977848	Iron EYTBW 2021 all environments BLUEs	6.33e-06	5
1B_635977848	1B	635977848	Iron EYTBW 2021 B2IR BLUEs	1.28e-05	5
1B_635977848	1B	635977848	Iron EYTBW 2021 B2IR Rep 1	0.000152	5
1B_635977848	1B	635977848	Zinc YTZN 2021 B5IR BLUEs	0.00039	5
1B_635977848	1B	635977848	Zinc YTZN 2021 B5IR Rep 2	0.000443	5
1B_641218839	1B	641218839	Iron EYTBW 2021 all environments BLUEs	0.000544	4
1B_641218839	1B	641218839	Zinc EYTBW 2021 all environments BLUEs	5.02e-05	4
1B_641218839	1B	641218839	Zinc EYTBW 2021 B5IR BLUEs	0.000475	4
1B_641218839	1B	641218839	Zinc EYTBW 2021 B5IR Rep 1	0.000135	4
1D_2510391	1D	2510391	Iron EYTBW 2021 all environments BLUEs	0.000151	6
1D_2510391	1D	2510391	Iron EYTBW 2021 B5IR BLUEs	5.84e-05	6
1D_2510391	1D	2510391	Iron EYTBW 2021 B5IR Rep 1	6.57e-05	6
1D_2510391	1D	2510391	Zinc EYTBW 2021 all environments BLUEs	0.00023	6
1D_2510391	1D	2510391	Zinc EYTBW 2021 B5IR BLUEs	0.000343	6
1D_2510391	1D	2510391	Zinc EYTBW 2021 B5IR Rep 1	0.000536	6
1D_2531230	1D	2531230	Iron EYTBW 2021 all environments BLUEs	0.000428	5
1D_2531230	1D	2531230	Iron EYTBW 2021 B5IR BLUEs	0.000344	5
1D_2531230	1D	2531230	Iron EYTBW 2021 B5IR Rep 1	0.000735	5
1D_2531230	1D	2531230	Zinc EYTBW 2021 all environments BLUEs	0.000934	5
1D_2531230	1D	2531230	Zinc EYTBW 2021 B5IR BLUEs	0.000613	5
2B_16863488	2B	16863488	Iron EYTBW 2021 B5IR BLUEs	0.000274	4
2B_16863488	2B	16863488	Iron EYTBW 2021 B5IR Rep 2	8.32e-05	4
2B_16863488	2B	16863488	Zinc EYTBW 2021 all environments BLUEs	0.000585	4
2B_16863488	2B	16863488	Zinc EYTBW 2021 B5IR Rep 2	0.0001	4
2B_602765846	2B	602765846	Iron EYTBW 2021 all environments BLUEs	0.000317	5
2B_602765846	2B	602765846	Iron EYTBW 2021 B2IR Rep 2	0.000753	5
2B_602765846	2B	602765846	Iron EYTBW 2021 B5IR BLUEs	0.00046	5
2B_602765846	2B	602765846	Iron EYTBW 2021 B5IR Rep 1	6.89e-06	5
2B_602765846	2B	602765846	Zinc combined panel B5IR % check	0.000831	5
2B_667426036	2B	667426036	Iron YTBW 2020 B5IR BLUEs	5.58e-05	3
2B_667426036	2B	667426036	Iron YTBW 2020 B5IR Rep 1	1.97e-05	3
2B_667426036	2B	667426036	Zinc EYTZN 2021 B5IR Rep 1	0.000704	3
2D_135478757	2D	135478757	Iron EYTBW 2021 all environments BLUEs	0.000123	4
2D_135478757	2D	135478757	Iron EYTBW 2021 B5IR Rep 1	0.000189	4
2D_135478757	2D	135478757	Zinc EYTBW 2021 B5IR BLUEs	0.000826	4
2D_135478757	2D	135478757	Zinc EYTBW 2021 B5IR Rep 1	0.000892	4
3B_734497793	3B	734497793	Iron EYTBW 2021 B2IR Rep 1	0.000633	3
3B_734497793	3B	734497793	Zinc YTBW 2020 B5IR BLUEs	0.000276	3
3B_734497793	3B	734497793	Zinc YTBW 2020 B5IR Rep 2	0.000865	3
4A_703167907	4A	703167907	Iron YTBW 2020 B5IR BLUEs	0.000848	4
4A_703167907	4A	703167907	Zinc YTBW 2020 B5IR BLUEs	9.55e-05	4
4A_703167907	4A	703167907	Zinc YTBW 2020 B5IR Rep 1	0.000667	4
4A_703167907	4A	703167907	Zinc YTBW 2020 B5IR Rep 2	0.000298	4
4A_703167987	4A	703167987	Iron YTBW 2020 B5IR Rep 2	0.000733	3
4A_703167987	4A	703167987	Zinc YTBW 2020 B5IR BLUEs	0.00035	3
4A_703167987	4A	703167987	Zinc YTBW 2020 B5IR Rep 2	0.000499	3
4A_710177715	4A	710177715	Iron EYTBW 2021 all environments BLUEs	0.000621	3
4A_710177715	4A	710177715	Zinc YTBW 2020 B5IR BLUEs	0.000576	3
4A_710177715	4A	710177715	Zinc YTBW 2020 B5IR Rep 2	0.000721	3
4B_14396319	4B	14396319	Iron combined panel B5IR % check	0.000708	4
4B_14396319	4B	14396319	Iron YTBW 2020 B5IR BLUEs	3.22e-05	4
4B_14396319	4B	14396319	Iron YTBW 2020 B5IR Rep 1	4.27e-06	4
4B_14396319	4B	14396319	Zinc EYTZN 2021 B5IR Rep 2	0.000773	4
4B_665552172	4B	665552172	Iron EYTBW 2021 B5IR BLUEs	0.000924	3
4B_665552172	4B	665552172	Iron EYTBW 2021 B5IR Rep 1	0.000301	3
4B_665552172	4B	665552172	Zinc EYTBW 2021 B5IR Rep 1	8.95e-05	3
4D_438790257	4D	438790257	Iron combined panel B5IR % check	0.000442	3
4D_438790257	4D	438790257	Zinc combined panel B5IR % check	0.00023	3
4D_438790257	4D	438790257	Zinc EYTBW 2021 all environments BLUEs	0.000719	3
5A_510211856	5A	510211856	Iron EYTZN 2020 B5IR BLUEs	0.000905	3
5A_510211856	5A	510211856	Iron EYTZN 2020 B5IR Rep 2	0.000653	3
5A_510211856	5A	510211856	Zinc EYTZN 2020 B5IR Rep 3	0.000314	3
5A_607673246	5A	607673246	Iron EYTBW 2021 all environments BLUEs	7.32e-06	6
5A_607673246	5A	607673246	Iron EYTBW 2021 B2IR BLUEs	0.000102	6
5A_607673246	5A	607673246	Iron EYTBW 2021 B2IR Rep 1	0.000918	6
5A_607673246	5A	607673246	Iron YTBW 2020 B5IR BLUEs	0.000973	6
5A_607673246	5A	607673246	Zinc YTBW 2020 B5IR BLUEs	0.000814	6
5A_607673246	5A	607673246	Zinc YTBW 2020 B5IR Rep 2	0.00019	6
5A_608344326	5A	608344326	Iron EYTBW 2021 all environments BLUEs	2.2e-05	6
5A_608344326	5A	608344326	Iron EYTBW 2021 B2IR BLUEs	5.43e-05	6
5A_608344326	5A	608344326	Iron EYTBW 2021 B2IR Rep 1	0.000352	6
5A_608344326	5A	608344326	Iron YTBW 2020 B5IR BLUEs	0.000313	6
5A_608344326	5A	608344326	Zinc YTBW 2020 B5IR BLUEs	0.000531	6
5A_608344326	5A	608344326	Zinc YTBW 2020 B5IR Rep 2	3.49e-05	6
5A_608360107	5A	608360107	Iron EYTBW 2021 all environments BLUEs	9.72e-06	7
5A_608360107	5A	608360107	Iron EYTBW 2021 B2IR BLUEs	3.27e-05	7
5A_608360107	5A	608360107	Iron EYTBW 2021 B2IR Rep 1	0.000813	7
5A_608360107	5A	608360107	Iron YTBW 2020 B5IR BLUEs	6.8e-05	7
5A_608360107	5A	608360107	Iron YTBW 2020 B5IR Rep 1	5.91e-05	7
5A_608360107	5A	608360107	Zinc YTBW 2020 B5IR BLUEs	0.000133	7
5A_608360107	5A	608360107	Zinc YTBW 2020 B5IR Rep 2	3.21e-05	7
5A_618265845	5A	618265845	Iron EYTBW 2021 B5IR BLUEs	0.000112	5
5A_618265845	5A	618265845	Iron YTBW 2020 B5IR BLUEs	0.000191	5
5A_618265845	5A	618265845	Iron YTBW 2020 B5IR Rep 1	0.000635	5
5A_618265845	5A	618265845	Zinc YTBW 2020 B5IR BLUEs	0.000634	5
5A_618265845	5A	618265845	Zinc YTBW 2020 B5IR Rep 2	4.63e-05	5
5B_559726088	5B	559726088	Iron EYTBW 2021 B5IR BLUEs	0.000433	5
5B_559726088	5B	559726088	Zinc EYTBW 2021 all environments BLUEs	0.000336	5
5B_559726088	5B	559726088	Zinc EYTBW 2021 B5IR BLUEs	0.00032	5
5B_559726088	5B	559726088	Zinc EYTBW 2021 B5IR Rep 1	0.000999	5
5B_559726088	5B	559726088	Zinc EYTBW 2021 SP BLUEs	0.000731	5
5B_586715328	5B	586715328	Iron EYTBW 2021 all environments BLUEs	0.000932	4
5B_586715328	5B	586715328	Iron EYTBW 2021 B5IR BLUEs	0.000748	4
5B_586715328	5B	586715328	Zinc EYTBW 2021 SP BLUEs	0.000164	4
5B_586715328	5B	586715328	Zinc EYTBW 2021 SP Rep 1	0.000353	4
6D_8662162	6D	8662162	Iron EYTZN 2020 B5IR Rep 1	0.000845	4
6D_8662162	6D	8662162	Zinc YTBW 2020 B5IR BLUEs	3.4e-05	4
6D_8662162	6D	8662162	Zinc YTBW 2020 B5IR Rep 1	0.000491	4
6D_8662162	6D	8662162	Zinc YTBW 2020 B5IR Rep 2	8.02e-05	4
7A_25860352	7A	25860352	Iron EYTBW 2021 B5IR BLUEs	0.000469	3
7A_25860352	7A	25860352	Iron EYTBW 2021 B5IR Rep 1	0.00054	3
7A_25860352	7A	25860352	Zinc EYTBW 2021 B5IR Rep 1	0.000133	3
7B_115377252	7B	115377252	Iron EYTBW 2021 B2IR BLUEs	0.000337	4
7B_115377252	7B	115377252	Iron EYTBW 2021 B2IR Rep 2	0.000869	4
7B_115377252	7B	115377252	Zinc YTBW 2020 B5IR BLUEs	0.000302	4
7B_115377252	7B	115377252	Zinc YTBW 2020 B5IR Rep 1	0.000305	4
7B_196382351	7B	196382351	Iron EYTBW 2021 all environments BLUEs	0.000782	3
7B_196382351	7B	196382351	Iron EYTBW 2021 B2IR BLUEs	0.000267	3
7B_196382351	7B	196382351	Zinc YTZN 2019 B5IR Rep 3	0.000785	3
7B_223178621	7B	223178621	Iron EYTBW 2021 B2IR Rep 1	0.00072	4
7B_223178621	7B	223178621	Zinc EYTBW 2021 all environments BLUEs	0.000432	4
7B_223178621	7B	223178621	Zinc EYTBW 2021 B2IR BLUEs	0.00088	4
7B_223178621	7B	223178621	Zinc EYTBW 2021 B5IR Rep 1	0.000937	4

## Sheet: Table S10
Marker	p-values	Additive effects	Percentage variation explained
1A_536664231	4.5E-04 - 9.6E-04	0.03 - 0.4 ppm	1.3 - 1.5%
1A_570615890	3.8E-04 - 8.8E-04	0.2 - 0.5 ppm	1.3 - 1.5%
1B_635977848	6.3E-06 - 4.4E-04	0.56 - 1.78 ppm	1.7 - 3%
1B_641218839	5.0E-05 - 5.4E-04	0.04 - 0.16 ppm	1.4 - 1.8%
1D_2510391	5.8E-05 - 5.4E-04	0.31 - 0.65 ppm	1.4 - 1.9%
1D_2531230	3.4E-04 - 9.3E-04	0.28 - 0.56 ppm	1.3 - 1.5%
2B_16863488	8.3E-05 - 5.9E-04	0.17 - 0.29 ppm	1.4 - 1.8%
2B_602765846	6.9E-06 - 8.3E-04	0.2 - 1.11 ppm	0.5 - 2.3%
2B_667426036	2.0E-05 - 7.0E-04	0.03 - 0.35 ppm	1.8 - 5.4%
2D_135478757	1.2E-04 - 8.9E-04	0.04 - 0.13 ppm	1.3 - 1.7%
3B_734497793	2.8E-04 - 8.7E-04	0.31 - 0.46 ppm	1.3 - 1.6%
4A_703167907	9.6E-05 - 8.5E-04	0.34 - 0.84 ppm	1.3 - 1.8%
4A_703167987	3.5E-04 - 7.3E-04	0.35 - 0.88 ppm	1.4 - 1.5%
4A_710177715	5.8E-04 - 7.2E-04	0.24 - 0.84 ppm	1.4 - 1.4%
4B_14396319	4.3E-06 - 7.7E-04	0.38 - 1.42 ppm	0.6 - 5.3%
4B_665552172	9.0E-05 - 9.2E-04	0.29 - 0.6 ppm	1.3 - 1.8%
4D_438790257	2.3E-04 - 7.2E-04	0.45 - 1.43 ppm	0.6 - 1.3%
5A_510211856	3.1E-04 - 9.1E-04	0.17 - 0.84 ppm	6 - 7%
5A_607673246	7.3E-06 - 9.7E-04	0.32 - 0.82 ppm	1.3 - 2.2%
5A_608344326	2.2E-05 - 5.3E-04	0.31 - 0.9 ppm	1.4 - 2%
5A_608360107	9.7E-06 - 8.1E-04	0.32 - 0.91 ppm	1.4 - 2.1%
5A_618265845	4.6E-05 - 6.4E-04	0.26 - 0.67 ppm	1.4 - 1.9%
5B_559726088	3.2E-04 - 1.0E-03	0.04 - 0.97 ppm	1.3 - 1.5%
5B_586715328	1.6E-04 - 9.3E-04	0.26 - 0.68 ppm	1.3 - 1.6%
6D_8662162	3.4E-05 - 8.5E-04	0.03 - 1.08 ppm	1.5 - 6.1%
7A_25860352	1.3E-04 - 5.4E-04	0.14 - 0.41 ppm	1.4 - 1.7%
7B_115377252	3.0E-04 - 8.7E-04	0.23 - 0.69 ppm	1.4 - 1.6%
7B_196382351	2.7E-04 - 7.9E-04	0.09 - 0.5 ppm	1.3 - 1.6%
7B_223178621	4.3E-04 - 9.4E-04	0.38 - 0.49 ppm	1.3 - 1.4%
